# Supplementary material for: Maxent-directed field surveys identify new populations of narrowly endemic habitat specialists
Source: PeerJ. 2017 Jul 31;5:e3632. doi: 10.7717/peerj.3632 (PMC5541929; doi:10.7717/peerj.3632)
Supplement: Data S2 [file peerj-05-3632-s004.csv]

site	transect	quadrat	sedge	canopy	herb	stem	burrow	elevation	solar	water_dist	cti	max	sand	silt	clay
160	160	481	0	10	98	42	0	335.831665	6101.243949	128.794051	8.894318	0.713868	42.17	49.05	8.78
160	160	482	0	4	95	38	0	335.927734	6101.939607	131.335271	8.51748	0.713868	42.17	49.05	8.78
160	160	483	0	10	97	25	0	335.960602	6101.541661	134.195837	8.678315	0.697455	42.17	49.05	8.78
160	160	484	0	6	95	32	0	336.150818	6101.350286	137.131814	8.076916	0.697455	42.17	49.05	8.78
160	160	485	0	5	93	23	0	336.100861	6101.62091	140.067779	10.396005	0.697455	42.17	49.05	8.78
160	160	486	0	10	97	26	0	336.245789	6102.428264	142.935868	8.457247	0.713956	42.17	49.05	8.78
161	161	487	1	21	80	25	0	335.802673	6093.38584	251.314293	8.345062	0.692499	28.46	55.12	16.42
161	161	488	1	27	95	16	0	335.596436	6090.478152	244.186225	8.534409	0.680892	28.46	55.12	16.42
161	161	489	1	27	90	32	0	335.330719	6092.447317	237.413094	8.888464	0.680892	28.46	55.12	16.42
161	161	490	1	25	85	30	0	335.140778	6091.082962	230.72562	7.148596	0.680892	28.46	55.12	16.42
161	161	491	1	32	80	7	0	334.897736	6089.153272	224.432125	9.192875	0.646905	28.46	55.12	16.42
161	161	492	0	20	85	9	0	334.666626	6088.684517	218.26683	7.015775	0.646905	28.46	55.12	16.42
163	163	493	0	8	90	13	0	350.273987	6109.74142	96.257499	8.254737	0.655729	45.7	47.08	7.23
163	163	494	0	20	85	12	0	350.273987	6109.74142	105.460639	8.254737	0.655729	45.7	47.08	7.23
163	163	495	0	24	95	12	0	349.970795	6110.471826	114.753971	6.978174	0.655729	45.7	47.08	7.23
163	163	496	0	30	85	16	0	349.635223	6104.435838	124.195879	6.675474	0.655729	45.7	47.08	7.23
163	163	497	0	7	95	19	0	349.036957	6100.001359	133.669007	7.210742	0.722825	45.7	47.08	7.23
163	163	498	0	42	90	11	0	349.031647	6102.053885	143.185357	7.277254	0.722825	45.7	47.08	7.23
164	164	499	1	1	86	18	0	344.913757	6105.268748	137.809926	8.377774	0.734414	45.7	47.08	7.23
164	164	500	1	40	80	7	0	345.227509	6103.474916	139.031745	9.731148	0.734414	45.7	47.08	7.23
164	164	501	1	37	90	11	0	345.521332	6100.983061	140.86292	8.827486	0.734414	45.7	47.08	7.23
164	164	502	1	24	95	10	0	345.957825	6084.592106	143.262469	6.368054	0.699165	45.7	47.08	7.23
164	164	503	1	8	95	14	0	346.225128	6077.472829	145.983101	7.654665	0.699165	45.7	47.08	7.23
164	164	504	1	0	97	7	0	346.590027	6076.640487	149.333592	6.261667	0.699165	45.7	47.08	7.23
166	166	505	1	12	80	27	0	333.513611	6087.299557	108.983214	7.47561	0.799674	36.14	52.07	11.79
166	166	506	1	1	88	47	1	333.032288	6090.118715	99.038566	7.940438	0.799674	36.14	52.07	11.79
166	166	507	1	0	90	17	3	332.662354	6092.110631	89.201516	9.499108	0.799674	36.14	52.07	11.79
166	166	508	1	0	75	46	2	332.322266	6092.593459	79.305543	10.00996	0.789346	36.14	52.07	11.79
166	166	509	1	0	90	32	1	332.098785	6094.762051	69.490311	10.053204	0.789346	36.14	52.07	11.79
166	166	510	1	0	70	42	1	331.734528	6095.208081	59.783197	8.197398	0.789346	36.14	52.07	11.79
167	167	511	1	0	35	20	0	344.108551	6096.195593	105.093756	11.329021	0.683801	12.52	70.16	17.31
167	167	512	1	0	45	14	0	344.040741	6096.259984	107.1186	7.829884	0.685121	12.52	70.16	17.31
167	167	513	1	0	65	7	1	343.915161	6095.702256	109.823207	9.15203	0.685121	12.52	70.16	17.31
167	167	514	1	0	65	18	1	343.770721	6095.519907	113.295416	9.471855	0.685121	12.52	70.16	17.31
167	167	515	1	0	55	11	1	343.678009	6096.077292	117.117074	8.186368	0.719019	12.52	70.16	17.31
167	167	516	1	0	45	27	0	343.518341	6095.08696	121.512005	7.249547	0.719019	12.52	70.16	17.31
170	170	517	1	0	45	19	1	336.642944	6103.948602	139.868006	7.229389	0.765013	33.99	54.64	11.36
170	170	518	1	0	65	22	2	336.322754	6105.979318	143.953849	7.488668	0.765013	33.99	54.64	11.36
170	170	519	1	0	70	27	2	335.916718	6106.370176	148.477342	7.725529	0.727058	33.99	54.64	11.36
170	170	520	1	1	65	16	1	335.491028	6104.361787	153.175619	8.9224	0.727058	33.99	54.64	11.36
170	170	521	1	2	80	19	0	335.328674	6100.180413	157.873895	11.329687	0.727058	33.99	54.64	11.36
170	170	522	1	3	45	13	4	335.436676	6099.14629	162.593895	7.566055	0.598675	33.99	54.64	11.36
172	172	523	0	1	95	16	0	319.796844	6095.802045	403.495988	7.729194	0.67426	40.99	47.79	11.21
172	172	524	1	4	87	9	0	319.713074	6094.376706	408.568159	7.062517	0.720018	40.99	47.79	11.21
172	172	525	0	20	90	13	0	319.552521	6091.481119	413.680381	7.210325	0.720018	40.99	47.79	11.21
172	172	526	1	20	90	64	0	319.365753	6091.112768	418.896297	7.601082	0.720018	40.99	47.79	11.21
172	172	527	1	25	90	9	0	319.280853	6091.667512	424.017514	7.7264	0.727833	40.99	47.79	11.21
172	172	528	1	41	85	16	0	319.19165	6091.654178	429.338224	7.754888	0.727833	40.99	47.79	11.21
174	174	529	0	0	85	27	0	335.913208	6097.057294	102.727525	8.796441	0.678924	37.67	51.73	10.6
174	174	530	0	0	90	10	0	335.741486	6094.724808	92.774941	8.674921	0.678924	37.67	51.73	10.6
174	174	531	0	0	85	37	0	335.308441	6091.803769	82.83369	8.509633	0.678924	37.67	51.73	10.6
174	174	532	0	0	90	25	0	334.87973	6095.238706	72.908408	8.841334	0.702299	37.67	51.73	10.6
174	174	533	0	0	80	21	0	334.65625	6098.219513	63.006642	12.438843	0.702299	37.67	51.73	10.6
174	174	534	0	0	90	7	0	334.421417	6097.528626	53.127385	8.007724	0.702299	37.67	51.73	10.6
175	175	535	0	13	78	24	0	322.952148	6092.067543	492.637284	8.949616	0.717762	13.11	73.7	13.19
175	175	536	0	4	85	19	0	322.780029	6090.961584	483.709499	9.135856	0.717762	13.11	73.7	13.19
175	175	537	0	2	80	23	0	322.609406	6089.95168	474.775716	10.121181	0.708773	13.11	73.7	13.19
175	175	538	0	8	90	22	0	322.463348	6089.937339	466.018354	9.66438	0.708773	13.11	73.7	13.19
175	175	539	0	12	83	13	2	322.001648	6090.880109	457.175892	10.145459	0.708773	13.11	73.7	13.19
175	175	540	0	9	90	6	0	321.955109	6094.794931	448.435444	11.458797	0.747592	13.11	73.7	13.19
178	178	541	0	0	98	32	0	360.661133	6113.60558	263.945927	9.072332	0.648063	28.46	55.12	16.42
178	178	542	0	0	97	17	0	360.654602	6113.038619	263.912351	8.798585	0.648063	28.46	55.12	16.42
178	178	543	0	0	99	21	0	360.635803	6113.160653	263.878055	8.859703	0.648063	28.46	55.12	16.42
178	178	544	0	0	100	17	0	360.651611	6113.28447	263.844458	8.795536	0.654322	28.46	55.12	16.42
178	178	545	0	0	97	17	0	360.583893	6112.643785	263.921753	8.177061	0.654322	28.46	55.12	16.42
178	178	546	0	0	98	12	0	360.49707	6112.07809	263.888134	9.660854	0.654322	28.46	55.12	16.42
180	180	547	0	70	45	7	0	341.55719	6088.554335	67.764413	11.239694	0.772301	43.01	49.47	7.52
180	180	548	1	56	35	12	0	341.636505	6091.151264	74.525976	11.661415	0.748679	43.01	49.47	7.52
180	180	549	0	1	65	6	0	341.856018	6091.341286	81.501551	7.936897	0.748679	43.01	49.47	7.52
180	180	550	1	5	80	14	0	341.91803	6092.145489	88.712991	8.139699	0.748679	43.01	49.47	7.52
180	180	551	0	12	88	16	0	341.969849	6092.132605	96.093731	11.771007	0.748679	43.01	49.47	7.52
180	180	552	1	9	90	5	0	342.066071	6091.988419	103.405598	11.701464	0.806922	43.01	49.47	7.52
182	182	553	1	0	45	57	0	334.398682	6094.973311	230.523429	9.804123	0.793037	37.67	51.73	10.6
182	182	554	1	4	75	37	0	334.564484	6092.848471	235.499383	9.378074	0.778354	37.67	51.73	10.6
182	182	555	1	9	30	16	0	334.815674	6089.923107	229.679005	8.516319	0.778354	37.67	51.73	10.6
182	182	556	1	12	78	24	0	335.078461	6075.461419	223.969929	7.126553	0.778354	37.67	51.73	10.6
182	182	557	0	21	90	18	0	336.273895	6083.148033	218.498685	5.853015	0.742869	37.67	51.73	10.6
182	182	558	0	12	85	46	0	336.903046	6099.953964	213.357032	8.075933	0.742869	37.67	51.73	10.6
186	186	559	0	4	90	37	0	323.468353	6090.939252	90.137512	7.757706	0.693026	30.88	55.9	13.22
186	186	560	0	4	95	27	0	323.649811	6092.442785	93.934216	7.960812	0.693026	30.88	55.9	13.22
186	186	561	0	0	85	31	0	323.785187	6089.518823	98.127895	7.699677	0.693026	30.88	55.9	13.22
186	186	562	0	9	100	32	0	323.832367	6089.707173	103.036975	8.447345	0.693026	30.88	55.9	13.22
186	186	563	0	100	15	0	0	323.856659	6087.998927	106.319611	9.284009	0.701784	30.88	55.9	13.22
186	186	564	0	40	35	16	0	323.867065	6087.169335	96.265765	9.580938	0.701784	30.88	55.9	13.22
187	187	565	0	89	5	2	0	384.511871	6129.438194	142.543935	9.325797	0.703159	34	54.29	11.71
187	187	566	0	100	5	0	0	384.576874	6130.736312	138.677362	8.703361	0.703159	34	54.29	11.71
187	187	567	0	53	15	8	0	384.81958	6131.701704	135.457235	8.949089	0.71358	34	54.29	11.71
187	187	568	0	43	65	13	0	384.886841	6130.126445	132.900763	8.384408	0.711779	34	54.29	11.71
187	187	569	0	90	20	0	0	384.882446	6129.562832	130.991915	9.469666	0.711779	34	54.29	11.71
187	187	570	0	25	55	9	0	384.94632	6128.73334	129.964752	12.759858	0.711779	34	54.29	11.71
188	188	571	0	46	85	12	0	353.096558	6093.931903	38.946122	7.748919	0.753851	14.56	70.84	14.61
188	188	572	0	40	88	19	0	352.779236	6094.676017	40.831224	7.752078	0.748015	14.56	70.84	14.61
188	188	573	0	20	90	25	0	352.222168	6095.190436	42.980191	8.238698	0.748015	14.56	70.84	14.61
188	188	574	1	3	97	22	0	352.056335	6095.444825	46.004849	8.364479	0.748015	14.56	70.84	14.61
188	188	575	0	31	87	20	0	351.845001	6095.099906	49.04413	8.355546	0.805647	14.56	70.84	14.61
188	188	576	0	41	83	21	0	351.462891	6092.621986	53.080014	9.229454	0.805647	14.56	70.84	14.61
190	190	577	0	0	90	27	0	337.765717	6094.200035	78.646921	8.176095	0.692333	36.14	52.07	11.79
190	190	578	0	0	95	28	0	338.099731	6093.851993	88.635015	6.787716	0.692333	36.14	52.07	11.79
190	190	579	0	0	95	23	0	338.36438	6094.559885	98.622628	8.953138	0.692333	36.14	52.07	11.79
190	190	580	0	25	85	27	0	338.69104	6094.030658	89.498126	8.551737	0.693964	36.14	52.07	11.79
190	190	581	0	98	65	32	0	339.170227	6085.93201	79.701563	6.831268	0.693964	36.14	52.07	11.79
190	190	582	0	32	35	18	0	339.992889	6084.81587	69.930581	6.076808	0.693964	36.14	52.07	11.79
195	195	583	0	0	88	58	0	335.569733	6095.050222	600.168192	7.79719	0.67111	24.99	63.65	11.35
195	195	584	0	0	85	78	0	335.426727	6094.600609	601.732982	9.033625	0.67111	24.99	63.65	11.35
195	195	585	0	0	95	32	0	335.391083	6094.349216	603.350443	13.293953	0.67111	24.99	63.65	11.35
195	195	586	0	0	95	52	0	335.394073	6094.454782	605.128954	10.285293	0.675664	24.99	63.65	11.35
195	195	587	0	0	99	56	0	335.392487	6095.343399	606.999439	8.730141	0.675664	24.99	63.65	11.35
195	195	588	0	4	98	49	0	335.46524	6096.801119	608.870903	7.958614	0.675664	24.99	63.65	11.35
197	197	589	0	0	87	4	0	330.065887	6050.425385	630.763438	7.774987	0.727915	28.46	55.12	16.42
197	197	590	0	0	85	11	0	329.424622	6064.750553	624.01121	8.259037	0.727915	28.46	55.12	16.42
197	197	591	0	0	78	8	0	328.956573	6072.548468	617.48411	9.455788	0.727915	28.46	55.12	16.42
197	197	592	0	0	65	3	0	328.723877	6077.651866	610.913116	9.779036	0.754235	28.46	55.12	16.42
197	197	593	1	0	85	7	2	328.464783	6082.263055	604.517725	7.271524	0.754235	28.46	55.12	16.42
197	197	594	0	0	98	16	0	328.361298	6083.274118	598.194062	7.310325	0.754235	28.46	55.12	16.42
198	198	595	0	0	35	3	0	332.856171	6093.081339	90.907518	9.258149	0.723858	31.3	52.55	16.15
198	198	596	1	0	95	17	0	332.856171	6091.964548	88.454883	6.315522	0.723858	31.3	52.55	16.15
198	198	597	0	0	98	11	0	332.602264	6090.783875	87.175928	7.244197	0.741705	31.3	52.55	16.15
198	198	598	1	1	97	32	0	332.374908	6082.16153	86.621183	9.282095	0.741705	31.3	52.55	16.15
198	198	599	1	6	98	22	0	332.306091	6073.000613	87.192229	6.95266	0.741705	31.3	52.55	16.15
198	198	600	0	43	97	27	0	332.280121	6066.164175	88.150733	7.753346	0.672852	31.3	52.55	16.15
200	200	601	0	0	70	18	0	347.16449	6104.486619	281.876018	8.77484	0.514218	33.99	54.64	11.36
200	200	602	0	0	95	32	0	347.084625	6104.975259	287.834653	7.835484	0.495104	33.99	54.64	11.36
200	200	603	0	0	95	42	0	347.03363	6105.172737	293.938863	8.481802	0.495104	33.99	54.64	11.36
200	200	604	0	0	98	38	0	347.001892	6104.601712	300.322382	10.927662	0.495104	33.99	54.64	11.36
200	200	605	0	0	99	47	0	347.022461	6100.445057	306.899903	11.482981	0.462672	33.99	54.64	11.36
200	200	606	0	0	95	28	0	347.240845	6096.768429	313.659087	8.840675	0.462672	33.99	54.64	11.36
201	201	607	1	0	90	13	0	325.258453	6062.687026	128.033473	8.622702	0.593056	23.47	64.09	12.44
201	201	608	0	0	55	11	0	324.576721	6041.73246	134.265646	10.02735	0.585029	23.47	64.09	12.44
201	201	609	0	0	90	24	0	324.576721	6041.73246	140.930932	10.02735	0.585029	23.47	64.09	12.44
201	201	610	1	22	85	16	0	324.665405	6025.749223	147.919797	6.780858	0.50436	23.47	64.09	12.44
201	201	611	0	32	95	24	0	325.677521	6008.285061	155.289397	6.59373	0.50436	23.47	64.09	12.44
201	201	612	1	40	90	18	0	326.810669	6002.898249	162.830895	6.124462	0.50436	23.47	64.09	12.44
204	204	613	1	0	90	28	0	330.76181	6084.87109	89.817318	10.818177	0.445618	34	54.29	11.71
204	204	614	0	0	95	22	0	330.799591	6093.352267	85.615857	9.060587	0.445618	34	54.29	11.71
204	204	615	1	4	97	32	0	331.170044	6092.139777	82.411003	6.14776	0.445618	34	54.29	11.71
204	204	616	1	3	95	27	0	331.519867	6094.893091	78.894776	6.454546	0.6196	34	54.29	11.71
204	204	617	1	8	90	26	0	330.877686	6096.14289	73.554935	6.282699	0.6196	34	54.29	11.71
204	204	618	0	4	98	28	0	330.850433	6092.271066	68.113021	6.707495	0.564905	34	54.29	11.71
205	205	619	1	15	60	34	4	348.453278	6105.152683	180.404826	10.276037	0.632722	37.67	51.73	10.6
205	205	620	1	11	45	41	2	348.489807	6105.179171	183.177944	8.138199	0.615231	37.67	51.73	10.6
205	205	621	1	16	65	30	4	348.493134	6105.300868	186.329474	10.07907	0.615231	37.67	51.73	10.6
205	205	622	1	9	55	7	3	348.580414	6106.048174	187.883371	7.765124	0.615231	37.67	51.73	10.6
205	205	623	1	10	50	41	2	348.608398	6106.76876	188.340194	7.641668	0.586505	37.67	51.73	10.6
205	205	624	1	0	65	21	1	348.541168	6107.47778	189.214463	8.053189	0.586505	37.67	51.73	10.6
206	206	625	0	0	99	118	0	329.980042	6093.568737	171.487783	8.142288	0.499752	33.99	54.64	11.36
206	206	626	0	0	100	114	0	329.979248	6093.796637	164.219953	8.49843	0.499752	33.99	54.64	11.36
206	206	627	1	0	100	96	0	329.970093	6094.730066	157.317804	10.117518	0.544758	33.99	54.64	11.36
206	206	628	0	0	100	84	0	329.895416	6094.949502	150.614251	11.037224	0.544758	33.99	54.64	11.36
206	206	629	1	0	87	88	0	329.897156	6094.037623	143.87176	10.765496	0.544758	33.99	54.64	11.36
206	206	630	0	0	100	110	0	329.925842	6093.384082	137.566357	8.237115	0.594261	33.99	54.64	11.36
207	207	631	1	12	65	21	0	336.45224	6090.782653	186.584333	6.528373	0.559254	36.14	52.07	11.79
207	207	632	1	17	75	24	0	336.180481	6091.538374	176.59831	6.960785	0.559254	36.14	52.07	11.79
207	207	633	1	15	55	21	0	335.761658	6095.29607	166.642119	6.469773	0.579119	36.14	52.07	11.79
207	207	634	1	22	45	10	0	335.190399	6099.940262	156.569114	7.598014	0.579119	36.14	52.07	11.79
207	207	635	1	7	95	14	0	335.082977	6102.84381	146.585266	7.31333	0.579119	36.14	52.07	11.79
207	207	636	1	6	95	37	0	335.010864	6103.021466	136.602363	7.287177	0.51111	36.14	52.07	11.79
211	211	637	0	100	10	0	0	306.861176	6077.921336	47.254403	8.948861	0.494112	14.56	70.84	14.61
211	211	638	0	66	15	0	0	307.043427	6076.744722	54.482561	7.752464	0.494112	14.56	70.84	14.61
211	211	639	1	88	35	0	0	307.099884	6074.59114	62.148072	8.064959	0.494112	14.56	70.84	14.61
211	211	640	1	47	70	23	0	307.329712	6073.613124	70.343692	7.525713	0.578205	14.56	70.84	14.61
211	211	641	0	73	60	7	0	307.256592	6072.107668	78.907888	9.423744	0.578205	14.56	70.84	14.61
211	211	642	1	51	100	19	0	307.233673	6071.942526	87.741156	10.104345	0.578205	14.56	70.84	14.61
213	213	643	1	59	88	22	0	327.268158	6089.949671	56.883052	7.766025	0.55842	36.14	52.07	11.79
213	213	644	1	98	95	36	0	327.128265	6088.705989	60.279997	7.282383	0.55842	36.14	52.07	11.79
213	213	645	0	35	85	27	0	326.743073	6093.037537	55.909695	7.454488	0.55842	36.14	52.07	11.79
213	213	646	1	27	90	17	0	326.581543	6094.135895	48.499017	7.264338	0.503283	36.14	52.07	11.79
213	213	647	0	89	85	21	0	326.352112	6094.77371	39.323255	7.573945	0.503283	36.14	52.07	11.79
213	213	648	0	53	95	24	0	326.151428	6094.930938	30.554718	7.157956	0.503283	36.14	52.07	11.79
214	214	649	0	31	70	18	0	337.101227	6080.773766	162.083315	8.588701	0.53048	42.17	49.05	8.78
214	214	650	0	30	80	6	0	337.101227	6081.91984	153.271792	7.14692	0.583077	42.17	49.05	8.78
214	214	651	0	23	35	3	0	337.077271	6087.236676	144.614507	6.968278	0.583077	42.17	49.05	8.78
214	214	652	0	42	45	11	0	336.981262	6095.898596	136.086497	6.686318	0.583077	42.17	49.05	8.78
214	214	653	0	31	70	0	0	336.778534	6100.2075	127.829941	8.48914	0.538578	42.17	49.05	8.78
214	214	654	3	24	20	0	0	336.615082	6100.979632	119.838745	8.944603	0.538578	42.17	49.05	8.78
216	216	655	1	0	67	47	3	303.151184	6083.772987	258.034325	8.12682	0.573973	23.42	62.71	13.87
216	216	656	1	4	60	10	3	303.154572	6083.695926	261.411426	8.124338	0.573973	23.42	62.71	13.87
216	216	657	1	1	98	42	1	302.31546	6082.439278	264.599558	8.221967	0.573973	23.42	62.71	13.87
216	216	658	1	24	80	28	1	301.805267	6081.675241	267.93907	8.6058	0.573973	23.42	62.71	13.87
216	216	659	1	45	80	36	1	301.884338	6081.456428	271.52723	8.751167	0.601835	23.42	62.71	13.87
216	216	660	1	60	45	52	1	301.445221	6078.690629	275.56005	10.527562	0.601835	23.42	62.71	13.87
221	221	661	1	17	25	4	0	359.121033	6103.888075	126.754399	7.798376	0.556531	45.7	47.08	7.23
221	221	662	1	23	65	11	0	359.516357	6095.682792	123.287498	7.191134	0.556531	45.7	47.08	7.23
221	221	663	1	12	77	21	0	360.440979	6101.302478	120.580911	6.795263	0.556531	45.7	47.08	7.23
221	221	664	1	15	87	19	0	360.721283	6111.645947	118.631126	6.969295	0.566077	45.7	47.08	7.23
221	221	665	1	13	80	10	0	360.574951	6106.220746	117.13405	6.981376	0.566077	45.7	47.08	7.23
221	221	666	1	15	85	8	0	360.270813	6100.054598	115.65801	7.519566	0.566077	45.7	47.08	7.23
222	222	667	0	0	55	22	0	323.46286	6097.772799	379.347046	7.737962	0.607508	25.36	64.04	10.6
222	222	668	0	0	70	16	0	323.791992	6097.171093	370.915535	7.152822	0.607508	25.36	64.04	10.6
222	222	669	0	0	65	13	0	323.880402	6094.417673	362.565403	8.14486	0.607508	25.36	64.04	10.6
222	222	670	0	0	70	39	0	324.040985	6092.734869	354.139264	7.577029	0.607508	25.36	64.04	10.6
222	222	671	0	0	90	32	0	323.936218	6092.208627	345.789138	9.416626	0.610598	25.36	64.04	10.6
222	222	672	0	0	85	32	0	324.064117	6094.296902	337.401737	8.400758	0.610598	25.36	64.04	10.6
223	223	673	0	2	15	14	0	317.984436	6090.07538	35.018696	6.629354	0.241711	22.14	65.75	12.11
223	223	674	0	12	35	27	0	318.151459	6087.106812	36.123817	6.787138	0.43137	22.14	65.75	12.11
223	223	675	0	13	85	24	0	318.32782	6088.507632	37.320238	6.940227	0.43137	22.14	65.75	12.11
223	223	676	0	22	90	18	0	318.416016	6087.000545	38.425358	7.168248	0.43137	22.14	65.75	12.11
223	223	677	0	100	5	0	0	318.416809	6085.317173	39.83193	7.382863	0.587231	22.14	65.75	12.11
223	223	678	0	81	75	11	0	318.416809	6086.747731	41.637363	7.410805	0.587231	22.14	65.75	12.11
227	227	679	1	0	70	37	0	304.938873	6065.239701	13.504569	8.42651	0.514143	23.42	62.71	13.87
227	227	680	0	0	80	29	0	305.212952	6069.182539	23.477108	8.849796	0.514143	23.42	62.71	13.87
227	227	681	0	0	90	76	0	305.455902	6069.37792	33.449647	8.702894	0.514143	23.42	62.71	13.87
227	227	682	1	0	85	31	0	305.700836	6067.547535	43.422184	7.808123	0.534356	23.42	62.71	13.87
227	227	683	1	0	95	54	0	306.201447	6069.571779	53.303082	7.410701	0.534356	23.42	62.71	13.87
227	227	684	1	0	65	38	0	306.456451	6072.638285	63.275616	7.098444	0.534356	23.42	62.71	13.87
229	229	685	0	2	80	21	0	301.557922	6083.854606	281.250392	8.271011	0.424297	15.85	64.74	19.4
229	229	686	0	1	70	17	0	301.543365	6083.974794	280.186505	8.257486	0.424297	15.85	64.74	19.4
229	229	687	0	10	85	31	0	301.539276	6084.562072	279.185917	9.779537	0.424297	15.85	64.74	19.4
229	229	688	0	41	80	12	0	301.526611	6085.157992	278.51392	8.273355	0.586631	15.85	64.74	19.4
229	229	689	0	36	87	11	0	301.52771	6085.261853	278.066401	6.588331	0.586631	15.85	64.74	19.4
229	229	690	0	5	90	21	0	301.310028	6084.341404	277.733654	11.32318	0.586631	15.85	64.74	19.4
234	234	691	1	0	75	32	0	333.542267	6102.54624	172.793833	8.31531	0.517958	37.67	51.73	10.6
234	234	692	1	20	70	27	0	333.901917	6104.125893	164.802871	7.831678	0.517958	37.67	51.73	10.6
234	234	693	1	20	95	37	0	333.825134	6103.681441	156.867009	6.733022	0.517958	37.67	51.73	10.6
234	234	694	1	4	80	25	0	333.69101	6103.19349	148.796459	8.390323	0.622841	37.67	51.73	10.6
234	234	695	0	0	99	42	0	333.597839	6102.787079	140.805519	6.837335	0.622841	37.67	51.73	10.6
234	234	696	0	0	95	46	0	333.450348	6102.284247	132.814586	8.252886	0.622841	37.67	51.73	10.6
236	236	697	1	0	96	16	0	344.949432	6111.396431	168.012591	8.255168	0.595559	45.7	47.08	7.23
236	236	698	1	0	97	23	0	345.092377	6111.672446	166.144572	9.105472	0.595559	45.7	47.08	7.23
236	236	699	1	0	90	23	0	344.990692	6111.918709	164.982127	8.751564	0.596311	45.7	47.08	7.23
236	236	700	1	17	95	22	0	344.876068	6111.936399	164.304116	8.861344	0.596311	45.7	47.08	7.23
236	236	701	1	38	90	27	2	344.910095	6111.879858	164.230509	8.861645	0.596311	45.7	47.08	7.23
236	236	702	1	10	97	14	0	345.058655	6111.298354	164.880807	6.734993	0.588931	45.7	47.08	7.23
237	237	703	0	0	87	24	0	320.40387	6092.663198	387.88107	7.356137	0.504259	40.99	47.79	11.21
237	237	704	0	0	95	29	0	320.531219	6093.452887	383.915557	7.271402	0.504259	40.99	47.79	11.21
237	237	705	0	0	90	11	0	320.631561	6092.068768	379.849272	7.513714	0.504259	40.99	47.79	11.21
237	237	706	0	6	65	7	0	320.823578	6094.511082	375.883793	6.673557	0.426103	40.99	47.79	11.21
237	237	707	0	0	86	16	0	320.934296	6096.540618	371.817488	8.059916	0.426103	40.99	47.79	11.21
237	237	708	1	0	90	11	0	321.003052	6096.524333	367.85199	8.39631	0.426103	40.99	47.79	11.21
238	238	709	0	0	100	17	0	318.264862	6067.733406	80.813601	8.416087	0.478834	23.47	64.09	12.44
238	238	710	1	0	90	21	0	318.264862	6067.733406	74.328081	8.416087	0.498882	23.47	64.09	12.44
238	238	711	1	1	65	32	0	318.786621	6065.626916	68.577786	7.349107	0.498882	23.47	64.09	12.44
238	238	712	0	4	13	7	0	319.373566	6064.754108	62.973807	6.678784	0.514871	23.47	64.09	12.44
238	238	713	1	0	90	33	0	319.461426	6066.280692	58.066401	8.531046	0.531571	23.47	64.09	12.44
238	238	714	0	0	95	22	0	320.027893	6068.226497	54.11541	6.685971	0.531571	23.47	64.09	12.44
239	239	715	0	6	20	4	0	333.075043	6104.816765	392.313806	6.534351	0.492685	22.59	65.96	11.45
239	239	716	1	44	95	32	0	332.690002	6102.922811	396.724038	7.213207	0.564245	22.59	65.96	11.45
239	239	717	0	8	85	35	0	332.860748	6099.650565	401.266661	6.8413	0.606656	22.59	65.96	11.45
239	239	718	0	98	78	8	0	332.860748	6099.650565	406.072126	6.8413	0.606656	22.59	65.96	11.45
239	239	719	1	100	45	2	0	332.573151	6097.499707	411.000226	9.903128	0.606656	22.59	65.96	11.45
239	239	720	1	80	65	28	0	332.237671	6095.862775	416.158214	10.176539	0.606656	22.59	65.96	11.45
241	241	721	0	45	75	12	0	303.83197	6087.0251	43.849107	8.314578	0.340969	31.3	52.55	16.15
241	241	722	0	43	90	19	0	303.75293	6087.217577	52.167762	6.577941	0.340969	31.3	52.55	16.15
241	241	723	1	50	90	4	0	303.57309	6087.311148	60.935974	8.165245	0.340969	31.3	52.55	16.15
241	241	724	0	2	95	29	0	303.361633	6086.76826	69.88548	7.929341	0.338131	31.3	52.55	16.15
241	241	725	0	89	90	32	0	303.094025	6086.103391	78.851599	8.488749	0.338131	31.3	52.55	16.15
241	241	726	1	86	98	25	0	302.990662	6086.351638	87.99436	7.56319	0.338131	31.3	52.55	16.15
243	243	727	1	40	100	32	0	312.431915	6055.246585	121.949427	7.534337	0.270413	34	52.96	13.05
243	243	728	0	85	90	26	0	312.843201	6054.750992	129.033046	6.842154	0.270413	34	52.96	13.05
243	243	729	1	22	95	37	0	313.171478	6052.168499	136.180758	11.389017	0.270413	34	52.96	13.05
243	243	730	1	70	85	7	0	313.460205	6051.1704	143.343797	7.315944	0.278723	34	52.96	13.05
243	243	731	0	60	65	7	0	313.84375	6047.421143	150.427416	7.170257	0.278723	34	52.96	13.05
243	243	732	1	80	90	26	0	314.303833	6047.205768	157.511036	7.139368	0.278723	34	52.96	13.05
245	245	733	0	0	0	0	0	281.511078	6063.309106	19.49728	7.602736	0.292246	40.99	47.79	11.21
245	245	734	0	0	30	16	0	281.501038	6062.410388	28.108915	8.611166	0.292246	40.99	47.79	11.21
245	245	735	1	0	25	17	0	281.683685	6062.625358	37.332157	8.340773	0.292246	40.99	47.79	11.21
245	245	736	0	16	20	13	0	281.746582	6062.122204	46.907774	13.585337	0.292246	40.99	47.79	11.21
245	245	737	0	52	15	4	0	281.746582	6062.122204	56.464595	13.585337	0.264514	40.99	47.79	11.21
245	245	738	0	17	45	11	0	281.90683	6062.673458	65.944006	10.496339	0.290295	40.99	47.79	11.21
247	247	739	1	0	85	92	2	305.953125	6056.273193	134.584001	7.379195	0.327618	24.99	63.65	11.35
247	247	740	1	0	77	27	2	306.095734	6052.728848	141.856029	7.549043	0.327618	24.99	63.65	11.35
247	247	741	1	0	85	27	0	306.790466	6060.972625	149.434926	6.612746	0.327618	24.99	63.65	11.35
247	247	742	1	0	86	48	1	307.048645	6051.865675	157.127448	6.140651	0.265224	24.99	63.65	11.35
247	247	743	0	8	90	64	0	308.099274	6060.341781	164.83518	6.225956	0.265224	24.99	63.65	11.35
247	247	744	1	0	88	47	4	308.491669	6065.658745	172.764709	6.590945	0.265224	24.99	63.65	11.35
249	249	745	1	1	78	27	0	448.556915	6105.861829	68.993202	6.172216	0.406611	46.46	46.22	7.32
249	249	746	1	0	70	24	0	448.319855	6105.408113	70.917846	8.554636	0.406611	46.46	46.22	7.32
249	249	747	1	7	65	23	0	448.9039	6108.307138	72.737107	8.168712	0.406611	46.46	46.22	7.32
249	249	748	1	6	85	19	0	448.690857	6105.175022	74.152483	6.113674	0.363806	46.46	46.22	7.32
249	249	749	1	7	90	14	0	448.804199	6104.161929	75.604536	9.090086	0.388688	46.46	46.22	7.32
249	249	750	1	1	65	12	0	448.583282	6105.337286	75.938343	8.360524	0.388688	46.46	46.22	7.32
251	251	751	1	30	90	22	0	408.480652	6117.650315	61.975751	12.024559	0.40486	39.35	48.97	11.68
251	251	752	1	35	95	35	0	408.555054	6111.541583	59.019837	7.68067	0.400085	39.35	48.97	11.68
251	251	753	1	37	95	13	0	408.522766	6111.045219	56.170727	10.148463	0.400085	39.35	48.97	11.68
251	251	754	0	31	98	42	0	408.52478	6114.156282	53.397049	10.791736	0.400085	39.35	48.97	11.68
251	251	755	0	42	45	9	0	408.579193	6113.17974	51.241451	7.779433	0.082006	39.35	48.97	11.68
251	251	756	0	39	97	36	0	408.579193	6112.263779	49.124686	7.7718	0.082006	39.35	48.97	11.68
253	253	757	0	9	65	14	0	289.886047	6032.449605	63.43909	11.112135	0.263911	23.47	64.09	12.44
253	253	758	0	7	90	37	0	289.676239	6038.712117	57.873562	9.386322	0.263911	23.47	64.09	12.44
253	253	759	0	2	95	27	0	289.526611	6039.142135	52.67323	8.936153	0.263911	23.47	64.09	12.44
253	253	760	1	1	88	17	0	289.365112	6038.73673	48.436035	8.983562	0.276039	23.47	64.09	12.44
253	253	761	1	2	80	39	0	289.247162	6040.180298	44.986207	7.910119	0.276039	23.47	64.09	12.44
253	253	762	0	4	95	27	0	289.229279	6041.445361	42.855161	8.894673	0.276039	23.47	64.09	12.44
255	255	763	1	0	95	17	0	286.044159	6074.945906	78.020272	7.523345	0.257306	29.06	57.83	13.11
255	255	764	0	0	96	14	0	286.324524	6072.181345	78.37229	7.425933	0.277811	29.06	57.83	13.11
255	255	765	0	0	98	19	0	286.324524	6070.306118	79.364927	10.943672	0.277811	29.06	57.83	13.11
255	255	766	0	16	100	21	0	286.522461	6072.221492	81.253056	9.090222	0.277811	29.06	57.83	13.11
255	255	767	0	43	80	19	0	286.705719	6072.101272	84.330671	7.5583	0.358707	29.06	57.83	13.11
255	255	768	0	48	96	18	0	286.821655	6071.172478	88.255263	8.560716	0.358707	29.06	57.83	13.11
257	257	769	1	1	65	7	0	286.449249	6068.99372	78.799567	7.811217	0.296157	13.11	73.7	13.19
257	257	770	0	0	95	22	0	286.449249	6069.261036	79.474948	7.938426	0.296157	13.11	73.7	13.19
257	257	771	0	31	65	19	0	286.600739	6072.892533	75.617775	8.289071	0.296157	13.11	73.7	13.19
257	257	772	0	80	20	8	0	286.870178	6074.505365	71.793714	7.624618	0.30278	13.11	73.7	13.19
257	257	773	0	62	35	6	0	287.24353	6074.72182	68.010211	6.969331	0.30278	13.11	73.7	13.19
257	257	774	0	40	80	13	0	287.468353	6073.396625	65.362664	7.147516	0.30278	13.11	73.7	13.19
259	259	775	1	0	65	7	0	292.277252	6075.695159	67.535307	7.47632	0.363534	31.67	56.99	11.34
259	259	776	1	0	70	6	0	292.187927	6075.282467	64.474892	8.570809	0.362622	31.67	56.99	11.34
259	259	777	1	0	80	6	0	292.118317	6075.079009	62.874031	8.249175	0.362622	31.67	56.99	11.34
259	259	778	1	0	78	13	0	292.102386	6074.372653	62.305753	7.707961	0.362622	31.67	56.99	11.34
259	259	779	1	0	95	11	0	292.130493	6072.182581	62.254798	7.994272	0.357066	31.67	56.99	11.34
259	259	780	1	0	90	8	0	292.005035	6071.884392	61.690618	14.663987	0.357066	31.67	56.99	11.34
261	261	781	0	0	30	0	0	298.773407	6071.291896	159.458477	8.330038	0.335348	30.88	55.9	13.22
261	261	782	0	0	15	3	0	298.771729	6074.039012	158.234618	8.259103	0.314494	30.88	55.9	13.22
261	261	783	0	0	3	5	0	298.725281	6073.170281	157.142687	9.579293	0.314494	30.88	55.9	13.22
261	261	784	0	0	15	0	0	298.749451	6069.665346	156.764424	7.518246	0.314494	30.88	55.9	13.22
261	261	785	0	0	35	27	0	298.381653	6056.866195	156.94127	6.665674	0.314494	30.88	55.9	13.22
261	261	786	0	2	78	22	0	297.755005	6058.709696	157.894275	7.343888	0.336634	30.88	55.9	13.22
263	263	787	0	100	0	0	0	300.799744	6077.183304	103.880723	8.317343	0.294393	23.21	65.81	10.98
263	263	788	0	100	0	0	0	300.784088	6077.080247	104.924831	8.27993	0.294393	23.21	65.81	10.98
263	263	789	0	100	2	0	0	300.70993	6077.36356	106.898636	8.208435	0.294393	23.21	65.81	10.98
263	263	790	0	100	2	0	0	300.743927	6077.493386	109.160458	8.115622	0.318462	23.21	65.81	10.98
263	263	791	0	100	1	0	0	300.79953	6077.350697	111.469942	8.170989	0.318462	23.21	65.81	10.98
263	263	792	1	100	5	0	0	300.690735	6077.060715	114.351989	8.042172	0.318462	23.21	65.81	10.98
265	265	793	0	16	80	21	0	292.740356	6065.883148	81.113495	8.300889	0.317666	29.06	57.83	13.11
265	265	794	0	32	98	20	0	292.740356	6065.883148	91.000797	8.300889	0.308086	29.06	57.83	13.11
265	265	795	0	5	80	27	0	292.903412	6067.047647	100.838908	7.732368	0.282555	29.06	57.83	13.11
265	265	796	1	8	97	27	0	292.951324	6068.868973	110.726286	9.962738	0.282555	29.06	57.83	13.11
265	265	797	0	11	83	42	0	292.951202	6069.127626	120.684329	7.975056	0.282555	29.06	57.83	13.11
265	265	798	1	4	90	27	0	292.809021	6070.103404	130.576884	9.117072	0.247517	29.06	57.83	13.11
267	267	799	0	0	98	61	0	357.642395	6117.542119	171.936025	6.682189	0.400803	37.95	50.4	11.64
267	267	800	0	0	97	72	0	357.642395	6117.542119	181.894415	6.682189	0.400803	37.95	50.4	11.64
267	267	801	0	0	96	28	0	357.696564	6117.560623	191.897861	6.588633	0.332416	37.95	50.4	11.64
267	267	802	0	0	96	98	0	358.459869	6122.413872	201.859392	8.193563	0.332416	37.95	50.4	11.64
267	267	803	0	0	96	86	0	359.073029	6122.747618	211.865952	5.918868	0.332416	37.95	50.4	11.64
267	267	804	0	0	98	18	0	359.825928	6125.74578	221.829778	6.154291	0.332416	37.95	50.4	11.64
269	269	805	1	0	85	4	0	303.596405	6070.987125	171.453559	8.133931	0.410594	31.67	56.99	11.34
269	269	806	1	1	45	6	0	303.650818	6071.803019	170.672421	9.770468	0.410594	31.67	56.99	11.34
269	269	807	1	0	45	11	1	303.845459	6073.963242	170.475909	9.978191	0.410594	31.67	56.99	11.34
269	269	808	1	0	80	14	1	304.022034	6076.334107	170.866041	9.881886	0.378014	31.67	56.99	11.34
269	269	809	1	0	65	15	0	304.255035	6077.184882	171.83882	9.56485	0.378014	31.67	56.99	11.34
269	269	810	0	0	95	16	0	304.528717	6078.433958	173.384441	9.664837	0.378014	31.67	56.99	11.34
271	271	811	1	0	90	36	0	293.786438	6072.514169	138.351764	8.359248	0.292455	31.67	56.99	11.34
271	271	812	1	0	80	23	2	293.613739	6072.4081	128.403852	8.783099	0.292455	31.67	56.99	11.34
271	271	813	1	0	100	42	0	293.670715	6071.72326	118.382431	8.44628	0.292455	31.67	56.99	11.34
271	271	814	1	0	95	46	0	293.587555	6071.926403	108.345313	8.11496	0.314715	31.67	56.99	11.34
271	271	815	1	0	95	33	0	293.502625	6071.721126	98.376923	11.007443	0.340645	31.67	56.99	11.34
271	271	816	1	0	85	26	1	293.465363	6073.032967	88.408538	11.635386	0.340645	31.67	56.99	11.34
273	273	817	0	21	75	3	0	314.299896	6094.289252	271.100124	6.248909	0.390654	15.85	64.74	19.4
273	273	818	0	31	55	0	0	314.497223	6094.380652	264.657672	7.990469	0.390654	15.85	64.74	19.4
273	273	819	0	4	60	6	0	314.728729	6093.558468	258.071799	6.581495	0.359131	15.85	64.74	19.4
273	273	820	0	21	70	3	0	314.971283	6093.749371	251.629362	6.932011	0.359131	15.85	64.74	19.4
273	273	821	0	30	65	4	0	315.071289	6093.463496	245.19765	7.21303	0.359131	15.85	64.74	19.4
273	273	822	0	24	80	19	0	315.24118	6092.843894	238.900868	7.194937	0.375274	15.85	64.74	19.4
275	275	823	1	0	45	41	0	326.169373	6077.600641	117.141565	6.985987	0.375247	23.47	64.09	12.44
275	275	824	1	0	80	6	0	326.169373	6083.739742	116.694965	6.427202	0.375247	23.47	64.09	12.44
275	275	825	1	0	85	22	0	325.830475	6083.358061	117.169159	8.667662	0.375247	23.47	64.09	12.44
275	275	826	1	0	80	21	0	325.732452	6080.803472	118.51324	7.681414	0.294058	23.47	64.09	12.44
275	275	827	0	1	90	24	0	325.268768	6077.454301	120.671284	7.686241	0.294058	23.47	64.09	12.44
275	275	828	1	6	90	17	0	325.240509	6073.516048	123.600666	7.603699	0.294058	23.47	64.09	12.44
277	277	829	0	9	65	7	0	372.135254	6119.890249	289.443953	8.046944	0.289213	34	54.29	11.71
277	277	830	0	5	70	5	0	372.136108	6118.250597	282.792868	6.978931	0.289213	34	54.29	11.71
277	277	831	0	10	80	6	0	372.060364	6116.075056	276.3448	7.611362	0.289213	34	54.29	11.71
277	277	832	0	2	65	4	0	371.989685	6104.174294	270.191566	7.255971	0.336988	34	54.29	11.71
277	277	833	0	11	55	7	0	371.350708	6089.865686	264.195473	7.354566	0.336988	34	54.29	11.71
277	277	834	0	18	55	10	0	370.803497	6094.476239	258.448548	8.869534	0.336988	34	54.29	11.71
279	279	835	1	0	85	46	0	330.694489	6086.645721	260.7355	9.515977	0.263676	39.35	48.97	11.68
279	279	836	1	0	90	49	0	330.744629	6085.83038	263.739497	8.134652	0.263676	39.35	48.97	11.68
279	279	837	0	0	80	13	0	330.726318	6086.178979	263.123949	8.946903	0.263676	39.35	48.97	11.68
279	279	838	1	0	75	37	1	330.738403	6086.957757	261.43415	9.768907	0.350411	39.35	48.97	11.68
279	279	839	1	0	85	36	2	330.738403	6086.957757	259.969619	9.768907	0.350411	39.35	48.97	11.68
279	279	840	1	0	90	46	0	330.726959	6089.200147	258.01703	13.050261	0.350411	39.35	48.97	11.68
282	282	841	0	56	95	52	0	142.352844	5977.610166	99.53729	7.042553	0.000016	18.31	65.67	16.02
282	282	842	0	60	100	48	0	142.101288	5982.966014	89.572248	7.310338	0.000064	18.31	65.67	16.02
282	282	843	0	99	100	20	0	141.672729	5984.366262	79.607205	7.279441	0.000064	18.31	65.67	16.02
282	282	844	0	80	100	47	0	140.895126	5982.185553	69.531801	7.407862	0.000064	18.31	65.67	16.02
282	282	845	0	60	100	25	0	140.163834	5981.472934	59.557832	7.858665	0.000071	18.31	65.67	16.02
282	282	846	0	52	100	34	0	139.744019	5977.394364	49.593571	9.367687	0.000071	18.31	65.67	16.02
283	283	847	0	0	56	15	0	238.725769	6020.072285	165.609196	6.653395	0.058385	38.71	52.62	8.68
283	283	848	0	0	55	33	0	238.994614	6036.459554	157.849591	8.246748	0.058385	38.71	52.62	8.68
283	283	849	0	0	75	29	0	238.948685	6032.583151	150.449981	7.485986	0.058385	38.71	52.62	8.68
283	283	850	0	0	25	25	0	238.929626	6037.529793	143.245278	8.535413	0.007897	38.71	52.62	8.68
283	283	851	0	0	30	5	0	238.877731	6032.176465	136.424851	7.345728	0.007897	38.71	52.62	8.68
283	283	852	0	0	20	5	0	238.833313	6034.552298	130.108414	7.73034	0.028499	38.71	52.62	8.68
287	287	853	0	92	5	2	0	258.792511	6045.177649	522.975472	7.690655	0.000001	37.65	53.37	8.98
287	287	854	0	96	5	2	0	258.379791	6040.135164	523.917068	7.066829	0.000001	37.65	53.37	8.98
287	287	855	0	43	5	2	0	259.351593	6035.403089	525.047524	5.283185	0.000001	37.65	53.37	8.98
287	287	856	0	78	48	23	0	259.806305	6034.73952	526.365625	5.917046	0	37.65	53.37	8.98
287	287	857	0	76	10	0	0	258.544952	6030.425908	527.869965	6.554141	0	37.65	53.37	8.98
287	287	858	0	100	5	0	0	258.544952	6030.425908	529.558958	6.554141	0	37.65	53.37	8.98
288	288	859	1	0	80	33	0	179.889603	5992.966158	477.586227	7.604155	0.001321	26.65	62.37	10.98
288	288	860	0	0	80	57	0	179.094742	5989.427579	467.637255	7.066338	0.001321	26.65	62.37	10.98
288	288	861	1	0	90	33	0	178.764084	5993.016883	457.689713	6.81888	0.00011	26.65	62.37	10.98
288	288	862	1	0	80	28	0	178.488861	5992.695663	447.743697	6.939323	0.000312	26.65	62.37	10.98
288	288	863	0	0	95	54	0	178.250778	5985.046541	437.724442	7.304018	0.000312	26.65	62.37	10.98
288	288	864	0	0	85	22	0	177.956955	5981.672554	427.716928	7.261086	0.000312	26.65	62.37	10.98
290	290	865	1	52	30	0	0	206.764999	5995.24953	57.212335	6.975278	0.010042	10.29	74.76	14.95
290	290	866	1	28	100	36	0	206.73436	5992.44434	58.764702	7.97156	0.001272	10.29	74.76	14.95
290	290	867	1	20	80	6	0	206.73436	5992.44434	60.327311	7.97156	0.001272	10.29	74.76	14.95
290	290	868	1	8	100	26	0	206.859604	5988.721982	62.057778	7.912451	0.002475	10.29	74.76	14.95
290	290	869	1	16	80	7	0	207.491623	5986.002279	64.566797	7.798627	0.002475	10.29	74.76	14.95
290	290	870	1	4	75	14	0	207.319672	5986.140735	67.118844	6.275142	0.002475	10.29	74.76	14.95
292	292	871	0	44	100	39	0	162.848602	5966.66446	43.355953	7.184927	0.000897	29.7	56.02	14.28
292	292	872	0	52	80	42	0	163.526291	5970.013438	49.591695	6.572387	0.002789	29.7	56.02	14.28
292	292	873	0	52	60	25	0	163.654037	5983.745277	55.735589	7.069321	0.002789	29.7	56.02	14.28
292	292	874	0	16	100	37	0	163.424088	5979.59235	61.554591	8.670249	0.002789	29.7	56.02	14.28
292	292	875	0	12	90	12	0	163.76593	5982.098057	66.878233	10.604511	0.002789	29.7	56.02	14.28
292	292	876	0	44	100	7	0	163.995956	5981.970892	71.036434	6.491683	0.000418	29.7	56.02	14.28
294	294	877	0	0	65	0	0	204.641083	5936.699181	149.359267	7.044597	0.001886	21.14	67.09	11.78
294	294	878	0	0	55	6	0	203.8405	5939.489776	154.882653	7.758915	0.00074	21.14	67.09	11.78
294	294	879	0	0	20	32	0	203.003418	5948.065271	160.840768	7.379876	0.00074	21.14	67.09	11.78
294	294	880	0	0	65	13	0	203.434402	5951.59214	167.187138	6.511429	0.00074	21.14	67.09	11.78
294	294	881	0	0	70	12	0	203.021606	5953.23837	173.90028	6.549378	0.00074	21.14	67.09	11.78
294	294	882	0	0	65	22	0	203.363129	5954.66527	180.804231	5.873568	0.005843	21.14	67.09	11.78
296	296	883	1	0	85	37	0	192.444427	5988.879807	119.621088	7.293474	0.001192	46.9	47.11	5.99
296	296	884	1	0	45	12	0	193.234894	5960.092426	120.395185	6.199994	0.001192	46.9	47.11	5.99
296	296	885	0	0	70	7	0	194.992981	5972.724677	121.393138	5.584422	0.001166	46.9	47.11	5.99
296	296	886	1	1	25	5	0	195.494751	6009.040617	122.397158	6.44072	0.001166	46.9	47.11	5.99
296	296	887	1	1	55	27	0	195.756317	6014.065402	124.004312	6.466424	0.001166	46.9	47.11	5.99
296	296	888	1	2	80	3	0	195.859665	6014.862845	126.232851	6.395999	0.000354	46.9	47.11	5.99
297	297	889	0	80	35	3	0	234.772339	5871.494392	76.481876	6.681528	0.000165	9.07	73.41	17.52
297	297	890	0	100	15	1	0	235.744354	5961.320666	76.450113	7.940274	0.000165	9.07	73.41	17.52
297	297	891	0	96	45	16	0	234.814957	5957.267544	76.447465	6.630858	0.000202	9.07	73.41	17.52
297	297	892	0	94	15	0	0	234.797455	5970.32456	76.415679	6.773805	0.000202	9.07	73.41	17.52
297	297	893	0	80	5	0	0	234.764694	5972.850743	76.383881	6.714675	0.000146	9.07	73.41	17.52
297	297	894	0	76	8	12	0	233.647385	5981.140276	76.444206	5.769871	0.000146	9.07	73.41	17.52
300	300	895	0	0	70	7	0	217.90509	6020.780417	88.130495	7.108359	0.046599	29.07	59.14	11.79
300	300	896	1	1	45	62	0	217.775192	6023.958015	87.346404	7.827012	0.046599	29.07	59.14	11.79
300	300	897	1	0	30	42	0	217.624817	6023.66293	87.616548	10.37838	0.045793	29.07	59.14	11.79
300	300	898	1	9	70	56	0	217.624817	6023.66293	89.106918	10.37838	0.045793	29.07	59.14	11.79
300	300	899	1	25	80	27	0	217.494537	6021.716287	91.314641	7.137178	0.045793	29.07	59.14	11.79
300	300	900	1	21	68	7	0	217.042282	6020.641492	94.284295	7.198904	0.035339	29.07	59.14	11.79
301	301	901	1	0	100	36	0	138.338486	5968.422697	73.048453	9.89324	0.000982	17.79	64.94	17.27
301	301	902	1	0	100	52	0	138.338486	5968.422697	68.320395	9.89324	0.000982	17.79	64.94	17.27
301	301	903	1	24	85	55	0	138.684631	5969.530592	64.650896	6.689764	0.000448	17.79	64.94	17.27
301	301	904	1	100	100	42	0	138.391373	5970.81453	61.368052	7.196176	0.000448	17.79	64.94	17.27
301	301	905	1	75	100	38	0	138.542953	5969.521813	58.130877	7.935726	0.00067	17.79	64.94	17.27
301	301	906	0	76	100	47	0	138.352768	5968.426436	55.915451	9.806908	0.00067	17.79	64.94	17.27
302	302	907	1	85	5	0	0	287.097778	6064.500811	523.811509	8.068655	0.000041	18.77	71.83	9.4
302	302	908	1	100	3	0	0	286.95932	6063.327162	532.242918	7.504734	0.000006	18.77	71.83	9.4
302	302	909	0	86	3	0	0	286.832794	6055.166387	540.726258	6.880514	0.000006	18.77	71.83	9.4
302	302	910	1	55	15	12	0	286.279846	6035.588481	549.286346	6.17612	0.000006	18.77	71.83	9.4
302	302	911	0	30	5	0	0	285.985565	6037.015091	557.972821	6.087109	0.000023	18.77	71.83	9.4
302	302	912	1	0	65	11	0	284.61795	6031.334178	566.598506	6.724556	0.000004	18.77	71.83	9.4
307	307	913	1	12	65	9	0	189.565933	6011.368582	809.119415	8.996085	0	36.12	56.42	7.47
307	307	914	1	8	60	7	0	189.343872	6011.479574	810.980862	9.108013	0	36.12	56.42	7.47
307	307	915	1	32	85	5	0	189.096008	6011.471273	812.882145	9.127323	0	36.12	56.42	7.47
307	307	916	1	50	75	4	0	188.967056	6011.771825	814.915335	9.209479	0	36.12	56.42	7.47
307	307	917	1	24	90	17	0	188.533295	6009.382508	817.053354	8.704651	0	36.12	56.42	7.47
307	307	918	1	52	95	27	0	188.533295	6009.382508	819.385198	8.704651	0	36.12	56.42	7.47
308	308	919	1	50	70	0	0	123.974815	5965.627496	78.585982	8.860802	0.001064	34.51	58.9	6.59
308	308	920	1	21	35	0	0	124.176285	5965.790341	87.959436	7.862644	0.001064	34.51	58.9	6.59
308	308	921	1	9	35	2	0	124.656921	5965.62267	97.250826	7.42332	0.000665	34.51	58.9	6.59
308	308	922	1	32	15	3	0	124.886086	5960.193782	106.62428	8.798614	0.000023	34.51	58.9	6.59
308	308	923	0	68	5	4	0	125.871307	5962.588243	115.935788	7.934125	0.000023	34.51	58.9	6.59
308	308	924	1	2	60	3	0	126.096771	5967.802803	125.309244	8.346027	0.000014	34.51	58.9	6.59
309	309	925	0	0	100	34	0	115.580734	5941.036346	64.297659	8.052597	0.000427	16.45	63.52	20.03
309	309	926	0	0	100	37	0	115.335579	5943.558267	66.808916	5.997887	0.000427	16.45	63.52	20.03
309	309	927	0	0	100	48	0	114.897072	5944.794853	69.930056	7.686105	0.000439	16.45	63.52	20.03
309	309	928	0	0	100	42	0	115.100182	5948.001968	73.141522	5.711037	0.000439	16.45	63.52	20.03
309	309	929	0	0	100	35	0	115.100182	5948.001968	76.352998	5.711037	0.000439	16.45	63.52	20.03
309	309	930	0	0	100	72	0	114.243332	5952.597233	78.556027	7.149278	0.000259	16.45	63.52	20.03
310	310	931	1	97	8	0	0	109.384399	5957.508533	445.623074	7.738095	0.000001	53.07	40.18	6.75
310	310	932	0	98	7	0	0	109.401222	5957.058279	435.813417	8.851032	0	53.07	40.18	6.75
310	310	933	0	100	5	1	0	109.472969	5957.550603	425.98123	7.564918	0	53.07	40.18	6.75
310	310	934	0	99	12	1	0	109.442802	5955.818159	416.171573	7.515609	0	53.07	40.18	6.75
310	310	935	1	96	5	2	0	109.361092	5953.109962	406.339387	7.945736	0	53.07	40.18	6.75
310	310	936	0	78	7	0	0	109.175842	5947.268104	396.52973	6.924277	0	53.07	40.18	6.75
311	311	937	1	24	95	23	0	223.245819	6018.716879	259.107764	8.443979	0.000062	9.07	73.41	17.52
311	311	938	1	40	90	16	0	222.714279	6019.383426	265.967359	8.608643	0.000062	9.07	73.41	17.52
311	311	939	1	40	100	47	0	222.899109	6016.94303	261.230673	8.853511	0.000062	9.07	73.41	17.52
311	311	940	0	28	95	37	0	222.606384	6011.925265	256.750322	7.611282	0.000062	9.07	73.41	17.52
311	311	941	0	25	100	25	0	222.114624	5972.26066	252.634375	6.794131	0.000036	9.07	73.41	17.52
311	311	942	0	30	100	54	0	222.114624	5972.26066	248.850138	6.794131	0.004811	9.07	73.41	17.52
313	313	943	0	52	90	15	0	188.160461	5994.131944	259.630064	6.119433	0.00037	29.68	59.4	10.92
313	313	944	1	20	85	27	0	185.553116	5985.642353	251.298797	6.952227	0.000337	29.68	59.4	10.92
313	313	945	0	24	70	12	0	185.080948	5995.738241	242.946052	6.201953	0.000337	29.68	59.4	10.92
313	313	946	0	0	70	56	0	184.946228	6000.903303	234.87239	5.63392	0.000337	29.68	59.4	10.92
313	313	947	0	0	80	48	0	183.839233	6000.898694	226.85773	6.413075	0.000024	29.68	59.4	10.92
313	313	948	0	1	90	64	0	183.851273	6000.900022	219.04723	6.913889	0.000024	29.68	59.4	10.92
314	314	949	0	24	10	4	0	170.711456	5990.989768	257.482199	7.554934	0.000359	37.98	48.68	13.35
314	314	950	1	48	98	169	0	170.721725	5983.359207	256.275682	6.730087	0.000359	37.98	48.68	13.35
314	314	951	1	24	90	47	0	170.21405	5968.153872	255.358156	7.254629	0.000359	37.98	48.68	13.35
314	314	952	0	98	1	0	0	169.575455	5964.830182	254.928018	6.719133	0.000479	37.98	48.68	13.35
314	314	953	0	100	1	0	0	168.936707	5973.697528	254.781263	7.235895	0.000479	37.98	48.68	13.35
314	314	954	0	100	1	0	0	168.395752	5983.375565	255.139574	7.735313	0.000479	37.98	48.68	13.35
318	318	955	0	48	20	0	0	241.917969	6007.049754	88.00926	7.945836	0.00544	16.24	72.24	11.52
318	318	956	1	60	70	17	0	242.006042	6005.040264	86.389977	7.860901	0.00544	16.24	72.24	11.52
318	318	957	0	93	65	14	0	242.110306	6003.114067	85.393878	7.801653	0.001738	16.24	72.24	11.52
318	318	958	1	90	80	29	0	242.131744	6002.032603	84.932234	7.774542	0.001738	16.24	72.24	11.52
318	318	959	1	96	55	2	0	242.163849	6001.643423	84.36054	7.756054	0.001738	16.24	72.24	11.52
318	318	960	1	88	55	0	0	241.729706	5998.103566	84.061683	7.905554	0.000916	16.24	72.24	11.52
