# Supplementary material for: Maxent-directed field surveys identify new populations of narrowly endemic habitat specialists
Source: PubMed Central journal article supplement (PMC5541929; doi:10.7717/peerj.3632), 2017-07-31
Supplement: peerj-05-3632-s005.pdf [file peerj-05-3632-s005.pdf]

THE USE OF RIGHT OF WAYS BY PRIMARY BURROWING CRAYFISHES IN THE  
OUACHITA MOUNTAINS ECOREGION OF ARKANSAS

BY

CODY MARTIN RHODEN

THESIS

Submitted in partial fulfillment of the requirements  
for the degree of Master of Science in Natural Resources and Environmental Sciences  
in the Graduate College of the  
University of Illinois at Urbana-Champaign, 2016

Urbana, Illinois

Master's Committee:

Adjunct Assistant Professor Christopher A. Taylor, Adviser  
Associate Professor Robert L. Schooley  
Adjunct Assistant Professor Michael Dreslik  
Assistant Professor William E. Peterman, The Ohio State University

## ABSTRACT

Roadside ditches can harbor beneficial and detrimental attributes for animal persistence. I sought to determine if roadside ditches could be preferred by two narrowly endemic primary burrowing crayfish species, *Fallicambarus harpi* and *Procambarus reimeri*. To investigate this interaction, I collected habitat data, locality information, and tested computer generated habitat models for these two species in the Ouachita Mountains Ecoregion (OME) of western Arkansas in the spring of 2014 and 2015. My first objective was to determine the fine-scale habitat preferences of *F. harpi* and *P. reimeri* in relation to their occurrence in roadside ditches. My analysis revealed these species to be habitat specialists, preferring open habitat with a low-herbaceous, wet microhabitat; similar to habitat found in roadside ditches. My second objective was to determine the ability of habitat models to accurately predict the occurrence of these two crayfishes across the OME. To investigate this objective, I used the locality data gained in the first field season to construct species distribution models using the program Maxent. I then used the species distribution model as a guide to sample for both crayfish species across the OME. My analysis revealed that species distribution models, specifically Maxent, are a suitable tool for analyzing and discovering new populations of both *F. harpi* and *P. reimeri*. My concentrated search efforts resulted in a documented range expansion of both species in the OME. My third objective was to assess the conservation status of both *F. harpi* and *P. reimeri*. Using the locality data that I collected over the two years of study (2014 and 2015), I was able to determine *F. harpi* and *P. reimeri* are constrained geographically but relatively stable throughout their range. I discovered new populations of both species, moderately expanding the range of *F. harpi* (<100 km<sup>2</sup>) and *P. reimeri* by a larger distance (>1000 km<sup>2</sup>). I conclude that the microhabitat of roadside ditches can be beneficial to the persistence of these two narrowly endemic habitat specialists in the Ouachita Mountains Ecoregion in Arkansas.

*To my grandparents, Bill and Gloria Emrich, and my parents, Steve and Kara Rhoden, who gave me the gift of higher education*

## ACKNOWLEDGEMENTS

I would like to thank my advisor, Dr. Christopher Taylor for all of his guidance and support throughout my graduate studies. The knowledge and patience that he has shown me have been invaluable to my education and development as a biologist. I would also like to thank Dr. Bill Peterman for sharing his extensive knowledge in modeling and statistical analysis, without which my results would be much less informative. Also thanks to Drs. Mike Dreslik and Bob Schooley for assistance with the initial study design and statistical analysis. I am grateful for those who helped me in the field and with permitting, namely Brian Wagner, Josh Seagraves, Allison Fowler, Andrea Daniel, Benjamin Thesing, and Justin Stroman. Special thanks to Sarah Tomke and Dan Wylie for their relenting assistance in digging mudbugs in the ditches of Arkansas with me. Finally, I would like to thank my friends and family for their unwavering support and encouragement during my graduate research.

**TABLE OF CONTENTS**

**CHAPTER 1: GENERAL INTRODUCTION**..... 1

**CHAPTER 2: ROADSIDES AS PREFERRED HABITAT FOR TWO NARROWLY ENDEMIC CRAYFISHES** ..... 12

**CHAPTER 3: FIELD VALIDATION OF MAXENT MODELING OF TWO NARROWLY ENDEMIC CRAYFISHES** ..... 40

**CHAPTER 4: HABITAT ASSESSMENT AND RANGE UPDATES FOR TWO RARE ARKANSAS BURROWING CRAYFISHES: *FALLICAMBARUS HARPI* AND *PROCAMBARUS REIMERI*** ..... 69

**SUMMARY** ..... 85

**APPENDIX A: CRAYFISH SAMPLING SUPPLEMENTARY MATERIAL** ..... 87

**APPENDIX B: CRAYFISH CAPTURE SUPPLEMENTARY MATERIAL**..... 89

**APPENDIX C: *FALLICAMBARUS HARPI* SAMPLING SUPPLEMENTARY MATERIAL**..... 94

**APPENDIX D: *PROCAMBARUS REIMERI* SAMPLING SUPPLEMENTARY MATERIAL**..... 120

## CHAPTER 1: GENERAL INTRODUCTION

The conservation of rare species is critical for the continuation of ecosystem function. Species considered rare can have a larger role in ecosystems than other more common species (e.g. keystone species; Power et al. 1996). Rare species contribute to ecosystem function by influencing pathways of energy and material flows (Hooper et al. 2005), resisting invasion (Lyons and Schwartz 2001), and delivering more unusual and important functions than their abundance would suggest (Mouillot et al. 2013). Conservation of rare species also adds to the biodiversity of an ecosystem, which in turn maintains the health of the ecosystem (Lyons et al. 2005). Unfortunately, the very nature of rare species (i.e., low abundance, narrow endemism) makes them difficult to study comprehensively. One such taxon in which rare species remain understudied are North American crayfishes (Taylor et al. 2007).

Approximately two-thirds of the 500+ species of crayfish in the world occur in North America (Taylor et al. 2007). Within North America, the majority (99%) of species are assigned to the family Cambaridae (Taylor et al. 2007), which reaches its highest diversity in the southeastern United States. Increases in species diversity lead to an increase in ecosystem function across many taxa (see review by Hooper et al. 2005), and in particular, the diversity of crayfishes observed in North America results in species' playing multiple roles in ecosystems.

Throughout their range, crayfishes are vital to ecosystem function (Momot 1995). Crayfishes act as ecosystem engineers by consuming detritus (Usio and Townsend, 2002), creating terrestrial habitat (Carpenter, 1953; Horwitz and Knott, 1991; Kingsbury and Coppola, 2000; Seigel, 1986; Welch et al., 2008), modifying sediment layers (Harvey et al., 2011; Statzner et al., 2000), and breaking down leaf litter in streams (Creed and Reed, 2004; Schofield et al., 2001). Crayfishes serve as an important prey item for sport fish (Clady, 1974; Lewis et al.,

1961), rare herpetofauna (Penn, 1950; Peterson et al., 1989; Smith et al., 1948), and many other aquatic and terrestrial animal species. Crayfishes can also act as predators (Parkyn et al., 2001; Taylor and Soucek, 2010) by preying upon aquatic and terrestrial invertebrates, fish, and other crayfishes.

However, as the importance and number of roles crayfishes inhabit become clearer, so do the nature and breadth of the threats they face. Approximately one-third of the world's crayfish species are threatened with extinction (Richman et al. 2015). In the United States and Canada, 48% of all crayfishes are considered imperiled (Taylor et al. 2007). In fact, crayfishes in the United States trail only freshwater mussels and snails in their level of imperilment (Wilcove and Master 2005). The specific threats facing native species of crayfishes include modification of species' habitats or ranges, over-utilization, disease, and limited distributions (Taylor et al. 2007). Animals that are rare or possess a restricted range are more sensitive to these cumulative stresses than more common, widespread fauna. Intensifying these threats is the lack of natural history data for many crayfish species, particularly North American primary burrowing crayfishes (Moore et al. 2013).

It is hypothesized all crayfishes have the ability to construct refugia and access ground or atmospheric water for oxygen extraction by burrowing into the soil or substrate (Berrill and Chenoworth 1982; Hobbs 1981). Based on differences in natural history, Hobbs (1981) described three classes of burrowing crayfishes: tertiary, secondary, and primary burrowers. Tertiary burrowers dig shallow burrows only to escape frost, lay and brood eggs, or avoid desiccation. Secondary burrowers spend much of their lives in their burrows, which normally have a connection to an open, permanent water body; however they do move out into open water occasionally. In contrast, primary burrowing crayfishes spend their complete life cycle

underground. As primary burrowers only leave their burrows to forage and locate a burrow of the opposite sex for mating (Hobbs 1981), their burrows are rarely tied to permanent open water. Rather, primary burrowers use subsurface groundwater for moisture and oxygenation. Primary burrowing crayfishes reach a high level of diversity in the eastern United States.

The Ouachita Highlands Freshwater Ecoregion, which covers southeastern Oklahoma, northeastern Texas, southern Arkansas, and northwestern Louisiana, has the sixth highest diversity of native crayfishes in the United States and Canada (Moore et al. 2013). Arkansas has 13 endemic crayfish species (Robison et al. 2008), of which eight are primary burrowing crayfishes. Within the Ouachita Highlands Freshwater Ecoregion, the Ouachita Mountains Ecoregion (OME) of southwestern Arkansas (Woods et al. 2004) has six species (*Fallicambarus harpi*, *F. jeanae*, *F. strawni*, *Procambarus liberorum*, *P. parasimulans*, and *P. reimeri*), which represents the highest diversity of primary burrowing crayfishes in the state. Because these crayfish occur at such a constrained geographic scale, it is important to accurately describe their habitat preferences to ensure management of habitats appropriate for those species.

Two narrowly endemic, primary burrowing crayfishes found in the OME are *Fallicambarus harpi* and *Procambarus reimeri*. *Fallicambarus harpi* was discovered in 1985 by H.H. Hobbs, Jr. and H.W. Robison and was known from Montgomery, Hot Spring, Garland, and Pike counties in Arkansas before 2015. *Fallicambarus harpi* is categorized as a primary burrower and is known from wet seepage areas with abundant sedges such as roadside ditches and other right of ways (Robison and Crump 2004). However, since 2004, no new information has been published relating to the range or habitat requirements of *F. harpi*. *Procambarus reimeri* was first discovered in 1979 by H.H. Hobbs, Jr. and was known from only one county (Polk) in western Arkansas before 2015. This primary burrowing crayfish reportedly constructs



simple burrows in sandy clay soil in wet seepage areas as well as roadside ditches (Hobbs 1979, Robison 2008), though no information has been published relating to the range or habitat requirements of *P. reimeri* since 2008. Much of the information that does exist fails to address the relationships between the crayfishes and their habitat. The relevant studies lean heavily on descriptions of the habitat during sampling periods and lack empirical evidence of habitat suitability. However, the current habitat preferences of these animals can be used to make inferences about their historic suitable habitat, undisturbed by anthropogenic change.

Human-made, linear right of ways (ROWs) are known to have burrowing crayfish burrows. The habitat in which these animals occurred naturally, before human development, could have been functionally similar to a human-made linear ROW. There are multiple records of burrowing crayfishes occurring in ROWs. These records are from species descriptions and natural history research (Doran and Richards, 1996; Hobbs and Whiteman, 1991; Norrocky, 1991; Page, 1985; Robison and Crump, 2004), and several museum databases (Illinois Natural History Survey Crustacean Database, Arkansas Department of Natural Heritage Database, and National Museum of Natural History Invertebrate Zoology Collection). This association is potentially due to the ease of sampling, as the ROW is highly accessible and provides a sampling area that results in high detectability from roadway maintenance, such as mowing and spraying woody vegetation. This roadway maintenance also contributes to a wet, low-herbaceous microhabitat. There currently is a lack of understanding as to whether the observed occurrence of these species in ROWs is an artifact of the accessibility of these habitats or whether the actual habitat created by ROW activities is preferred.

To assess the possibility *F. harpi* and *P. reimeri* prefer the microhabitat of the ROW and to fill in the knowledge gaps associated with their habitat preferences and population statuses, I

developed a study with the following objectives: 1) to test *a priori* hypotheses about the habitat use of two primary burrowing crayfish species (*F. harpi* and *P. reimeri*) in relation to their occurrence in roadways, 2) to investigate the use of statistical modeling to predict the occurrence of individuals across the landscape and use these predictions to refine future sampling, and 3) to delineate the geographic distribution of both species using field-validated distribution models.

The body of this thesis is divided into three separate chapters. Chapter 2 describes the habitat preferences of *F. harpi* and *P. reimeri* in relation to their occurrence in ROWs. The use of computer modeling to predict the occurrence of both crayfishes is described in Chapter 3. The final chapter consists of range delineations for both species and a conservation assessment.

## LITERATURE CITED

- Berrill, M., and B. Chenoworth. 1982. The Burrowing Ability of Nonburrowing Crayfish. *American Midland Naturalist* 108:199–201.
- Carpenter, C. C. 1953. A Study of Hibernacula and Hibernating Associations of Snakes and Amphibians in Michigan. *Ecology* 34:74–80.
- Clady, M. D. 1974. Food Habits of Yellow Perch, Smallmouth Bass and Largemouth Bass in Two Unproductive Lakes in Northern Michigan. *American Midland Naturalist* 91(2):453–459.
- Creed Jr., R. P., and J. M. Reed. 2004. Ecosystem engineering by crayfish in a headwater stream community. *Journal of the North American Benthological Society* 23(2):224–236.
- Doran, N., and K. Richards. 1996. Management requirements for rare and threatened burrowing crayfish in Tasmania. Tasmanian Public Land Use Commission. Tasmania RFA Environment and Heritage Technical Committee. Hobart, Tasmania.
- Harvey, G. L., T. P. Moorhouse, N. J. Clifford, A. J. Henshaw, M. F. Johnson, D. W. Macdonald, I. Reid, and S. P. Rice. 2011. Evaluating the role of invasive aquatic species as drivers of fine sediment-related river management problems: The case of the signal crayfish (*Pacifastacus leniusculus*). *Progress in Physical Geography* 35(4):517–533.
- Hobbs, H. H., Jr. and M. Whiteman. 1991. Notes on the Burrows, Behavior, and Color of the Crayfish *Fallicambarus (F.) devastator* (Decapoda: Cambaridae). *The Southwestern Naturalist* 36:127–135.
- Hobbs, H. H., Jr. 1979. A new crayfish from the Ouachita River basin in Arkansas (Decapoda: Cambaridae). *Proceedings of the Biological Society of Washington* 92(4):804–811.

- Hobbs, H.H., Jr. and H.W. Robison. 1985. A new burrowing crayfish (Decapoda: Cambaridae) from southwestern Arkansas. *Proceedings of the Biological Society of Washington* 98(4):1035-1041.
- Hobbs, H. H., Jr. 1981. *The Crayfishes of Georgia*. Smithsonian Contributions to Zoology. Smithsonian Contributions to Zoology, Washington D.C.
- Hooper, D.U., F.S. Chapin III, J.J. Ewel, A. Hector, P. Inchausti, S. Lavorel, J.H. Lawton, D.M. Lodge, M. Loreau, S. Naeem, B. Schmid, H. Setälä, A.J. Symstad, J. Vandermeer, and D.A. Wardle. 2005. Effects of biodiversity on ecosystem functioning: a consensus of current knowledge. *Ecological Monographs* 75(1):3-35.
- Horwitz, P., and B. Knott. 1991. The faunal assemblage in freshwater crayfish burrows in sedgeland and forest at Lightning Plains, Western Tasmania. *Papers and Proceedings of the Royal Society of Tasmania* 125:29–32.
- Kingsbury, B. A., and C. J. Coppola. 2000. Hibernacula of the Copperbelly Water Snake (*Nerodia erythrogaster neglecta*) in Southern Indiana and Kentucky. *Journal of Herpetology* 34(2):294–298.
- Lewis, W. M., G. E. Gunning, E. Lyles, and W. L. Bridges. 1961. Food Choice of Largemouth Bass as a Function of Availability and Vulnerability of Food Items. *Transactions of the American Fisheries Society* 90(3):277–280.
- Lyons, K.G., M.W. Schwartz. 2001. Rare species loss alters ecosystem function – invasion resistance. *Ecology Letters* 4:358-365.
- Lyons, K. G., C. A. Brigham, B. H. Traut, and M. W. Schwartz. 2005. Rare Species and Ecosystem Functioning. *Conservation Biology* 19(4):1019–1024.

- Momot, W. T. 1995. Redefining the role of crayfish in aquatic ecosystems. *Reviews in Fisheries Science* 3:33-63.
- Moore, M. J., R. J. DiStefano, and E. R. Larson. 2013. An assessment of life-history studies for USA and Canadian crayfishes: identifying biases and knowledge gaps to improve conservation and management. *Freshwater Science* 32(4):1276–1287.
- Mouillot, D., D. R. Bellwood, C. Baraloto, J. Chave, R. Galzin, M. Harmelin-Vivien, M. Kulbicki, S. Lavergne, S. Lavorel, N. Mouquet, C. E. T. Paine, J. Renaud, and W. Thuiller. 2013. Rare Species Support Vulnerable Functions in High-Diversity Ecosystems. *PLoS Biology* 11(5):e1001569.
- Norrocky, M. J. 1991. Observations on the Ecology, Reproduction, and Growth of the Burrowing Crayfish *Fallicambarus (Creaserinus) fodiens* (Decapoda: Cambaridae) in North-central Ohio. *American Midland Naturalist* 125:75–86.
- Page, L. 1985. The crayfishes and shrimps (Decapoda) of Illinois. *Illinois Natural History Survey Bulletin*. 33(4):i-339.
- Parkyn, S., K. Collier, and B. Hicks. 2001. New Zealand stream crayfish: functional omnivores but trophic predators? *Freshwater Biology* 46:641–652.
- Penn, G. H. 1950. Utilization of crawfishes by cold-blooded vertebrates in the Eastern United States. *American Midland Naturalist* 44(3):643–658.
- Peterson, C. L., J. W. Reed, and R. F. Wilkinson. 1989. Seasonal Food Habits of *Cryptobranchus alleganiensis* (Caudata: Cryptobranchidae). *The Southwestern Naturalist* 34:438–441.
- Power, M. E., D. Tilman, J. A. Estes, B. A. Menge, W. J. Bond, L. S. Mills, G. Daily, J. C. Castilla, J. Lubchenco, and R. T. Paine. 1996. Challenges in the Quest for Keystones. *BioScience* 46(8):609–620.

- Richman, N. I., M. Böhm, S. B. Adams, F. Alvarez, E. A. Bergey, J. J. S. Bunn, Q. Burnham, J. Cordeiro, J. Coughran, K. A. Crandall, K. L. Dawkins, R. J. DiStefano, N. E. Doran, L. Edsman, A. G. Eversole, L. Füreder, J. M. Furse, F. Gherardi, P. Hamr, D. M. Holdich, P. Horwitz, K. Johnston, C. M. Jones, J. P. G. Jones, R. L. Jones, T. G. Jones, T. Kawai, S. Lawler, M. López-Mejía, R. M. Miller, C. Pedraza-Lara, J. D. Reynolds, A. M. M. Richardson, M. B. Schultz, G. A. Schuster, P. J. Sibley, C. Souty-Grosset, C. A. Taylor, R. F. Thoma, J. Walls, T. S. Walsh, and B. Collen. 2015. Multiple drivers of decline in the global status of freshwater crayfish (Decapoda: Astacidea). *Philosophical transactions of the Royal Society of London. Series B, Biological sciences* 370:20140060.
- Robison, H. W., and B. Crump. 2004. Distribution, natural history aspects, and status of the Arkansas endemic crayfish, *Fallicambarus harpi* Hobbs and Robison, 1985. *Journal of the Arkansas Academy of Science* 58:91–94.
- Robison, H. W., C. McAllister, C. Carlton, and G. Tucker. 2008. The Arkansas endemic biota: An update with additions and deletions. *Journal of the Arkansas Academy of Science* 62:84-96.
- Robison, H. W. 2008. Distribution, life history aspects, and conservation status of three Ouachita Mountain crayfishes: *Procambarus tenuis*, *P. reimeri*, and *Orconectes menae*. U.S.D.A. Forest Service, Ouachita National Forest. Hot Springs, Arkansas.
- Schofield, K. A., C. M. Pringle, J. L. Meyer, and A. B. Sutherland. 2001. The importance of crayfish in the breakdown of rhododendron leaf litter. *Freshwater Biology* 46:1191–1204.
- Seigel, R. A. 1986. Ecology and conservation of an endangered rattlesnake, *Sistrurus catenatus*, in Missouri, USA. *Biological Conservation* 35:333–346.

- Smith, H. M., C. W. Nixon, and P. E. Smith. 1948. A Partial Description of the Tadpole of *Rana areolata circumlosa* and Notes on the Natural History of the Race. *American Midland Naturalist* 39(3):608–614.
- Statzner, B., E. Fievet, J. Champagne, R. Morel, and E. Herouin. 2000. Crayfish as geomorphic agents and ecosystem engineers: biological behavior affects sand and gravel erosion in experimental streams. *Limnology and Oceanography* 45(5):1030–1040.
- Taylor, C. A., G. A. Schuster, J. E. Cooper, R. J. DiStefano, A. G. Eversole, P. Hamr, H. H. Hobbs III, H. W. Robison, C. E. Skelton, and R. F. Thoma. 2007. A reassessment of the conservation status of crayfishes of the United States and Canada after 10+ years of increased awareness. *Fisheries* 32(8):372–389.
- Taylor, C., and D. Soucek. 2010. Re-examining the importance of fish in the diets of stream-dwelling crayfishes: implications for food web analyses and conservation. *The American Midland Naturalist* 163:280–293.
- Usio, N., and C. R. Townsend. 2002. Functional significance of crayfish in stream food webs: roles of omnivory, substrate heterogeneity, and sex. *Oikos* 98:512–522.
- Welch, S. M., J. L. Waldron, A. G. Eversole, and J. C. Simoes. 2008. Seasonal Variation and Ecological Effects of Camp Shelby Burrowing Crayfish (*Fallicambarus gordonii*) Burrows. *The American Midland Naturalist* 159(2):378–384.
- Wilcove, D. S., and L. L. Master. 2005. How Many Endangered Species are there in the United States? *Frontiers in Ecology and the Environment* 3:414–420.
- Woods, A. J., T. L. Foti, S. S. Chapman, J. M. Omernik, J. A. Wise, E. O. Murray, W. L. Prior, J. B. J. Pagan, J. A. Comstock, and M. Radford. 2004. Ecoregions of Arkansas (color poster

with map, descriptive text, summary tables, and photographs). US Geological Survey map scale 1:1,000,000. U.S. Geological Survey, Reston, Virginia.



## **CHAPTER 2: ROADSIDES AS PREFERRED HABITAT FOR TWO NARROWLY ENDEMIC CRAYFISHES<sup>1</sup>**

### **INTRODUCTION**

Human-made linear right-of-ways (ROWs) such as roads, roadside ditches, public utility easements, and railroad lines, and their maintenance are dramatically altered landscape features that traditionally have been observed to have a negative effect on habitat and life-history attributes of animal populations (Rytwinski and Fahrig 2013). For example, ROWs can disrupt wildlife movements (Richardson et al. 1997), fragment habitat (Andrews 1990), and directly cause mortality (Ashley and Robinson 1996, Lode 2000). Roads can act as a physical barrier to movement as well as a behavioral barrier (Oxley et al. 1974, Riley et al. 2006). In addition, the particulate matter emissions from vehicles can be a negative attribute of roadside microhabitat environments (Thorpe and Harrison 2008). Conversely, roadsides can positively contribute to plant and animal persistence by acting as vectors for native and nonnative species dispersal (Gelbard and Belnap 2003) and have led to higher animal densities and diversity than in surrounding habitat (Adams and Geis 1983). Such interactions observed in these areas are directly contributable to the construction and maintenance of the linear ROW.

The objectives of roadside maintenance activities have changed very little since their conversion from dirt trails to paved roads and include maintaining hydraulic capacity of ditches, eliminating vegetative obstructions, and providing wildlife habitat where compatible with roadway traffic (Berger 2005). The ROW environment is disturbed constantly by roadside maintenance (e.g. mowing, spraying herbicide, tree cutting) and remains open, resulting in habitats that resemble early successional stages in natural landscapes. Thus, roadside

---

<sup>1</sup> This chapter includes material in press at the time of writing this thesis. Citation: Rhoden, C.M., C.A. Taylor, W.E. Peterman. 2016. Highway to Heaven? Roadsides as preferred habitat for two narrowly endemic crayfish. *Freshwater Science*. 35(3):XXXX

maintenance can lead to open habitat within a matrix of forested habitat (Watkins et al. 2003), an alteration that can be both beneficial and detrimental to the persistence of wildlife.

The characteristics of animal populations that are vulnerable to negative road effects have been documented as those having high intrinsic mobility, high migration potential, multiple resource needs, low density/large area requirements, and a low reproductive rate; being a forest interior species; and displaying a behavioral avoidance of roads (Forman et al. 2003). Animals that display these traits are inhibited by the physical presence of the road and influences associated with the ROW, such as edge effects. Investigators have studied the responses of various biotic communities to ROWs (see Spellerberg 1998), but the interaction of biotic communities and ROWs is still not fully understood. Fahrig and Rytwinski (2009) reviewed biotic communities and roadsides and found that 59% of interactions resulted in a negative effect on animal abundance. The minority of animal populations that experience some positive effects from roadsides have a small territory range, have a high reproductive rate, and are small bodied. Investigators have shown a positive response from fauna that exhibit these life-history characteristics (Peris and Pescador 2004, Rosa and Bissonette 2007, Ward et al. 2008). Small populations of endemic habitat specialists often experience negative effects from ROW construction and maintenance (e.g. Altrichter and Boaglio 2004, Pocock and Lawrence 2005, Semlitsch et al. 2007). However, construction and maintenance of ROWs could benefit directly some narrowly endemic habitat specialist taxa by creating suitable habitat (Forman et al. 2003). One such taxon experiencing these benefits could be North American primary burrowing crayfishes.

All crayfishes are hypothesized to have the ability to construct refugia by way of burrowing into the soil or substrate (Hobbs 1981, Berrill and Chenoworth 1982). Construction of

burrows and the open space within them allow access to ground or atmospheric water for O<sub>2</sub> extraction. Hobbs (1981) described three classes of burrowing crayfishes based on differences in natural history: tertiary, secondary, and primary burrowers. Tertiary burrowers dig shallow burrows only to escape frost or seek shelter when the body of water they are inhabiting dries up. Secondary burrowers spend much of their lives in their burrows; however, they do move out into open water occasionally, and their burrows normally have a connection to an open, permanent water body. Primary burrowing crayfishes spend their complete life cycle underground. As primary burrowers leave their burrows only to forage and locate a burrow of the opposite sex for mating (Hobbs 1981), their burrows are rarely tied to permanent open water. Rather, these species use subsurface groundwater for moisture and oxygenation.

Prior to the 20<sup>th</sup> century, the habitat in which some primary burrowing crayfishes occurred naturally could have been functionally similar to some human-made ROWs. Specifically, human-made ROWs, such as roadsides, could imitate the hypothesized natural habitat of these animals by creating a landscape that is void of trees, supports a perched water table, and maintains an open, low-herbaceous microhabitat. To study the relationship between crayfishes and ROWs, we examined two narrowly endemic habitat specialists, *Fallicambarus harpi* and *Procambarus reimeri*, known from the Ouachita Mountains Ecoregion (OME) of western Arkansas (Woods et al. 2004). These species are vulnerable to population declines and are currently listed as endangered (*P. reimeri*) and vulnerable (*F. harpi*) according to Taylor et al. 2007. The conservation categories of endangered and vulnerable are based upon the American Fisheries Society Endangered Species Committee, which follows Williams et al. 1993. In addition, these species were included in a recent petition filed by the privately funded Center for Biological Diversity for protection under the US Endangered Species Act.

Both species are known historically from <40 individual sampling sites in restricted areas of the OME. Robison and Crump (2004) reported *F. harpi* as occurring in wet grassy areas that often had abundant sedges and grasslands such as ditches and pastures. Robison (2008) reported the habitat in which *P. reimeri* was observed as wet seepage areas and roadside ditches. Based on historic accounts of both species, we predicted some habitat attributes would be more important than others, particularly the presence of sedges and open canopy. We also expected soil composition would be a strong driver of burrow placement. Soil cues are important for other burrowing crayfishes (e.g. Grow and Merchant 1980, Barbaresi et al. 2004, Helms et al. 2013). To evaluate whether *F. harpi* and *P. reimeri* could be experiencing a positive effect from the microhabitat in ROWs, we developed a study based on extensive field sampling and habitat modeling of multiple variables to determine the fine-scale habitat preferences of both *F. harpi* and *P. reimeri* in relation to ROWs.

## METHODS

### Study site

Our study sites were situated in the Ouachita and Caddo River drainages of southwestern Arkansas. We focused on five counties in the OME that encompassed the entire known range of *F. harpi* and *P. reimeri* (**Fig. 2.1**). The OME has the highest diversity of primary burrowing crayfishes in the state. Six species occur there: *Fallicambarus harpi*, *F. jeanae*, *F. strawni*, *Procambarus liberorum*, *P. parasimulans*, and *P. reimeri*.

The Ouachita Mountains are composed of parallel, folded, east–west ridges underlain by shale and sandstone (Miser 1929). The soils of this region are generally categorized as silty clay and silty loam (Hlass et al. 1998). The most common forest community is mixed pine–hardwood;

however, remnant pine-bluestem (*Pinus-Schizachyrium*) communities do exist (Phillips and Marion 2005). Logging and recreation make up the major land uses of this area, and pastureland and hay fields are found in the broader valleys (Woods et al. 2004). We focused our sampling effort in these broader valleys.

### **Field collections**

All sampling took place in April 2014 during the peak activity period for both species (Robison and Crump 2004, Robison 2008) and thus would result in highest species detection. The databases of the Illinois Natural History Survey Crustacean Collection, National Museum of Natural History Invertebrate Zoology Collection, and Arkansas Department of Natural Heritage were used to identify known historical locations for both *F. harpi* and *P. reimeri*. For each species, we selected historic localities that were accessible and could be validated with geographic positioning information. At each sampling site we positioned three to six 50 m transects  $\leq 100$  m from the initial transect. The initial transects were parallel to the road and within the ROW. We placed the initial transect at each sampling site where burrows were present, ensuring the initial transect was situated at the historical museum location. All transects were delineated with a fiberglass measuring tape. We laid out each transect and then checked for the presence or absence of burrows and standing water. After we obtained a global positioning system location and azimuth at the 0-m mark, we placed a 1-m<sup>2</sup> polyvinyl chloride quadrat over the tape every 10 m, which resulted in six 1-m<sup>2</sup> quadrats/50-m transect. After we completed the initial transect, we completed the remaining two to five transects in adjacent habitat in the same manner. We decided the number of transects to be sampled at each site based on habitat heterogeneity. If a site was homogenous, we sampled fewer transects to increase the number of sampling sites that could be visited during our sampling window. We defined adjacent habitat as

having significantly more or less canopy cover, seemingly different soil moisture content, higher or lower elevation, or a different dominant vegetation type compared with the initial transect. We excavated burrows at each sampling site and along each transect to ensure any burrows counted at a sampling site harbored the target species. We collected voucher specimens of each target species from all sites with burrows present and deposited them in the Illinois Natural History Survey Crustacean Collection.

### **Habitat variables**

We collected the following habitat variables within each 1-m<sup>2</sup> quadrat: percent tree canopy cover, percent herbaceous ground cover, stem density, number of burrows, and the presence or absence of hydrophilic sedges (**Appendix A; Table A.1**). We estimated percent tree canopy cover with a concave spherical densiometer (Spherical Densiometer, Model-C; Robert E. Lemmon, Forest Densiometers, Bartlesville, Oklahoma). We calculated percent herbaceous ground cover by inverting the concave spherical densiometer over the 1-m<sup>2</sup> quadrat. We calculated stem density by counting the stems within a smaller (100-cm<sup>2</sup>) quadrat placed within the upper right-hand corner of each 1-m<sup>2</sup> quadrat. We scored the presence vs absence of hydrophilic sedges by recording the presence or absence of herbaceous plants that had three-ranked leaves, an angular stem, and a spiked fruiting body. At each transect, we collected three evenly spaced soil samples with a soil probe (AMS 7/8 in. [2.2 cm] diameter open-end probe) at a minimum depth of 43 cm and a maximum depth of 66 cm. These depths reflect the column of soil the crayfishes are using for burrow construction (Robison and Crump 2004 and validated in the field). We analyzed the soil samples with laser diffraction on a Malvern Mastersizer 3000 (Malvern Instruments, Malvern, UK) to obtain a percent composition (sand, silt, and clay) for each sample. We computed the isometric log-ratio transformation for these soil data (Egozcue et

al. 2003). We constructed a soil texture plot with the package `soiltexture` in R (Fig. 4; Moeys 2015). The selected habitat variables reflect habitat characteristics associated with *F. harpi* (Robison and Crump 2004) and *P. reimeri* (Robison 2008), other primary burrowing crayfish species (Hobbs 1981, Welch and Eversole 2006, Loughman et al. 2012), and biological intuition. The habitat variables and a description of each model term used in the statistical analysis are shown in **Table 2.1**.

We mapped the quadrat locations in ArcGIS (version 10.2; Environmental System Research Institute, Redlands, California). We then calculated the following habitat variables for each quadrat with ArcGIS: elevation, distance to nearest waterbody, compound topographic index value (CTI), and solar radiation value. We measured elevation as the height in meters above sea level and distance to nearest waterbody as the Euclidean distance from all permanent waterbodies. We assessed CTI with the Geomorphometry and Gradient Metrics toolbox for ArcGIS (version 11.0; Evans et al. 2010). This metric is a function of both the slope and the upstream contributing area per unit width orthogonal to the flow direction. CTI is a steady state wetness index, where a larger CTI value represents areas that are topographically suitable for water accumulation. We measured solar radiation by calculating the watt-hour/m<sup>2</sup> of the delineated sampling area using the Area Solar Radiation tool in ArcMap. We calculated all ArcGIS values with digital elevation maps (National Elevation Dataset; <http://ned.usgs.gov/>) and surface water maps (National Hydrography Dataset; <http://nhd.usgs.gov/index.html>) at a resolution of 10 m in an attempt to minimize autocorrelation. We combined the habitat variables collected in the field and those calculated with ArcGIS into one data set for a fine-scale analysis of habitat features affecting crayfish burrow placement on the landscape.

## Modeling analysis

We conducted all fine-scale statistical analyses in R (version 3.1.1; R Project for Statistical Computing, Vienna, Austria). We made the isometric log-ratio transformations with the package *compositions* (van den Boogaart et al. 2014) and used generalized linear mixed models to analyze the data (package *lme4*; Bates et al. 2014). The response variable in each model was the number of burrows within each 1-m<sup>2</sup> quadrat and was modeled with a Poisson error distribution and log link. We modeled burrow counts separately for each species. To account for potential site effects, we modeled transects nested within sites as a random effect in each model. We scaled and centered all habitat variables by subtracting the variable mean from each respective value and dividing by the standard deviation of that variable. We tested for overdispersion for each model before comparison of all models. We assessed model convergence and fit and then adjusted the optimization algorithm as needed. We did not include covariates having a Spearman correlation coefficient of  $>0.60$  in the confined candidate model set in an attempt to avoid multicollinearity of our variables in the modeling suite. The full candidate model set and each hypothesis tested is shown in **Table 2.2**. We compared candidate models with Akaike's Information Criterion corrected for small sample sizes (AICc; Akaike 1974). We examined the relative support for each model and calculated unbiased model-averaged parameter estimates from the top models ( $\Delta\text{AICc} < 4$ ) with the package *MuMIn* (Barton 2014) by means of model selection and averaging methods described by Burnham and Anderson (2002) and Luckacs et al. (2009).



## RESULTS

### Field collections

Our search of museum databases resulted in 57 unique historic capture records (24 for *F. harpi* and 33 for *P. reimeri*). The records ranged from 1967 to 2008, and the oldest record we visited was from 1973. We sampled 11 of these localities (35 transects, 210 quadrats) for *F. harpi* and 9 of these localities (37 transects, 222 quadrats) for *P. reimeri*. Most (75%) of these localities were in the ROW of secondary, local, and private roads. Other sampling sites (25%) were situated in yards, pastures, and adjacent habitat farther from the ROW (up to 90 m). *Fallicambarus harpi* was present at all 11 sites (20 transects, 58 quadrats). *Procambarus reimeri* was present at 8 of the 9 sites sampled (23 transects, 52 quadrats). In total, we counted 143 burrows for *F. harpi* and 71 burrows for *P. reimeri*.

### Modeling analysis

*Fallicambarus harpi* and *P. reimeri* had similar patterns of habitat selection. For both species, canopy cover was the most important habitat variable, and it was present in all top models ( $\Delta\text{AICc} < 4$ , **Table 2.3**). Model-averaged parameter estimates for both species are shown in **Table 2.4**. The number of burrows in a quadrat was negatively associated with canopy cover (**Fig. 2.2A, 2.3A**) while the presence of hydrophilic sedges was positively associated with the number of burrows in a quadrat (**Fig 2.2B, 2.3B**). The transformed soil variables and stem density variable were also present in the top models. Burrows were generally present in quadrats with little to no canopy cover (mean  $\pm$  SD, 4.4%  $\pm$  17.7,  $n = 110$ ). No burrow was observed in a quadrat with complete canopy cover (100%). Sedges were present in 83% of the quadrats that harbored burrows of either species ( $n = 110$ ).

## DISCUSSION

We developed a suite of models to assess our predictions regarding the habitat preferences of *F. harpi* and *P. reimeri*. We found support for some of our predictions, whereas some results were counterintuitive. Open-canopy habitat and the presence of sedges were important for burrow placement across the sampled landscape. Our predictions that these variables would be preferred by both species of crayfish were supported by the models fitted with generalized linear mixed-model analysis. The presence of hydrophilic sedges is an indication of a seepage area or that the water table is relatively close to the ground surface (Schütz 2000). The absence of tree canopy cover also contributes to these wet seepage areas (Eastham et al. 1994). Our prediction that soil would be a strong predictor was not supported. This outcome was potentially a result of the way we spatially segregated our soil samples. We collected soil samples that fell into only three distinct soil textural classes (silt loam, loam, and sandy loam; **Fig. 2.4**), which did not capture the variation seen across the entire OME. Overall, however, our findings point to the preference of ROW-like habitat for *F. harpi* and *P. reimeri*. The habitat in which animals were most abundant was treeless, wet seepage areas with abundant low grasses and sedges. The soil composition at these occupied sites was primarily loam and silt loam (Soil Survey Division Staff 1993; 90% of *F. harpi* quadrats, 92% of *P. reimeri* quadrats). The burrows of *F. harpi* and *P. reimeri* were complex, 0.5–1 m in depth, and connected to groundwater. Our results highlight the specific importance of these wet, open-canopy habitats as a preferred environment for both species.

Previous studies of other primary burrowing crayfish species have revealed the existence of habitat specialists and habitat generalists. Specialist species occur in habitats ranging from pitcher plant bogs (*Fallicambarus gordonii* [Johnston and Figiel 1997]) to sand ridges

(*Distocambarus crokeri* [Welch and Eversole 2006]), whereas generalist species such as *Procambarus gracilis* (Hobbs and Rewolinski 1985), *Fallicambarus devastator* (Hobbs and Whiteman 1991), *Fallicambarus fodiens* (Norrocky 1991), *Cambarus catagius* (Mcgrath 1994), *Cambarus dubius* (Loughman 2010), and *Cambarus thomai* (Loughman et al. 2012) can be found in both forested floodplains and open habitat throughout their respective ranges. Based on the modeling and field observations, *F. harpi* and *P. reimeri* can be considered habitat specialists. They occur in wet, open herbaceous areas and not in the adjacent forested habitat. We believe the microhabitat of the roadside ditch is acting as suitable habitat for these specialists within a matrix of unsuitable habitat.

We sampled transects adjacent to known localities to better model habitat preference for each species. The habitats sampled by these transects generally differed in composition from the ROW (**Appendix A; Table A.1**) but were spatially proximate so as to be accessible to crayfishes. These sites composed 25% of the sampling locations and were not in the ROW. We designed this sampling scheme with the knowledge that it would be unnecessary and cost ineffective to sample the entirety of the OME randomly. Primary burrowing crayfishes rarely, if ever, inhabit permanent open water (Hobbs 1981) such as streams, lakes, and swamps, or high-gradient slopes found in the larger OME. A review of over 2000 freshwater crayfish collections made in the state of Arkansas (Illinois Natural History Survey Crustacean Collection and National Museum of Natural History Invertebrate Zoology Collection) revealed no observations of *F. harpi* or *P. reimeri* in either of these habitat types. Thus, we think the microhabitat available to primary burrowing crayfishes is spatially restricted because of their life-history characteristics (Hobbs 1981), and those available habitats were represented in our sampling design.

The microhabitat found in roadside ditches where these animals occur is a result of the physical presence of the road and roadside maintenance. The surface of the road is less permeable than the surrounding habitat, which diverts precipitation into the surrounding terrain (MacDonald et al. 2001). The roadside ditch also intercepts groundwater flow, adding more water to the roadside microhabitat (Forman et al. 2003). Roadside maintenance halts succession by removing woody stems and constantly disturbs the herbaceous community with mowing and herbicide application. The removal of woody stems also increases the soil moisture in the roadside habitat (Eastham et al. 1994) because woody stems have deeper root systems and are capable of transpiring more water from the soil than are herbaceous plants. Through these road-maintenance activities, the ROW habitat is uniformly distributed where the road occurs. These attributes of the roadside appear to have created suitable habitat for these two species of primary burrowing crayfishes.

The characteristics of animal populations vulnerable to negative road effects have been documented as having a high level of mobility, behaviorally avoiding roads, and being habitat generalist or forest interior species. The negative responses observed in the biota that have these characteristics are not seen in *F. harpi* or *P. reimeri*. These two species do not show a high level of mobility or a behavioral avoidance of roads: some of the ROW sites revisited in our study were first discovered >40 years ago. These animals are also not perceived as being habitat generalists or forest interior species. They were observed in open, wet, herbaceous areas, which suggests these species are habitat specialists within the broader matrix of forested habitat that dominates the OME. They may also be avoiding other direct negative effects of inhabiting ROWs by spending most of their life underground. Other species of burrowing crayfishes have

been observed evading the effects of pesticide use by occupying a buffer zone within their burrows during pesticide application (Sommer 1983).

Our findings add to the understanding of the interactions between ROWs and the biota that live within them. Previous research has shown positive and negative responses of biota to ROWs (e.g. Adams and Geis 1983, Forman et al. 2003, Fahrig and Rytwinski 2009). Our study is the first to show a positive interaction between a narrowly endemic habitat specialist and a ROW habitat that is commonly seen as highly altered and detrimental to endemic wildlife populations. We are confident that we captured different potential habitat types available to *F. harpi* and *P. reimeri* by sampling the adjacent habitat. The adjacent habitats were out of the ROW and generally did not have the habitat characteristics of the roadside ditch. We think these crayfishes prefer the ROW microhabitat because of the lack of canopy and presence of sedges, which presents a moist, low-herbaceous environment. These data support the benefit of ROWs to the persistence of these narrowly endemic habitat specialists. The use of this habitat by these species could also encourage dispersal along these linear corridors. Future work is needed to assess this possibility and to investigate locations within the OME within and well beyond the roadside ditch, where these animals are not known to occur.

## TABLES AND FIGURES

Figure 2.1. Sites sampled for *Fallicambarus harpi* and *Procambarus reimeri* in Arkansas

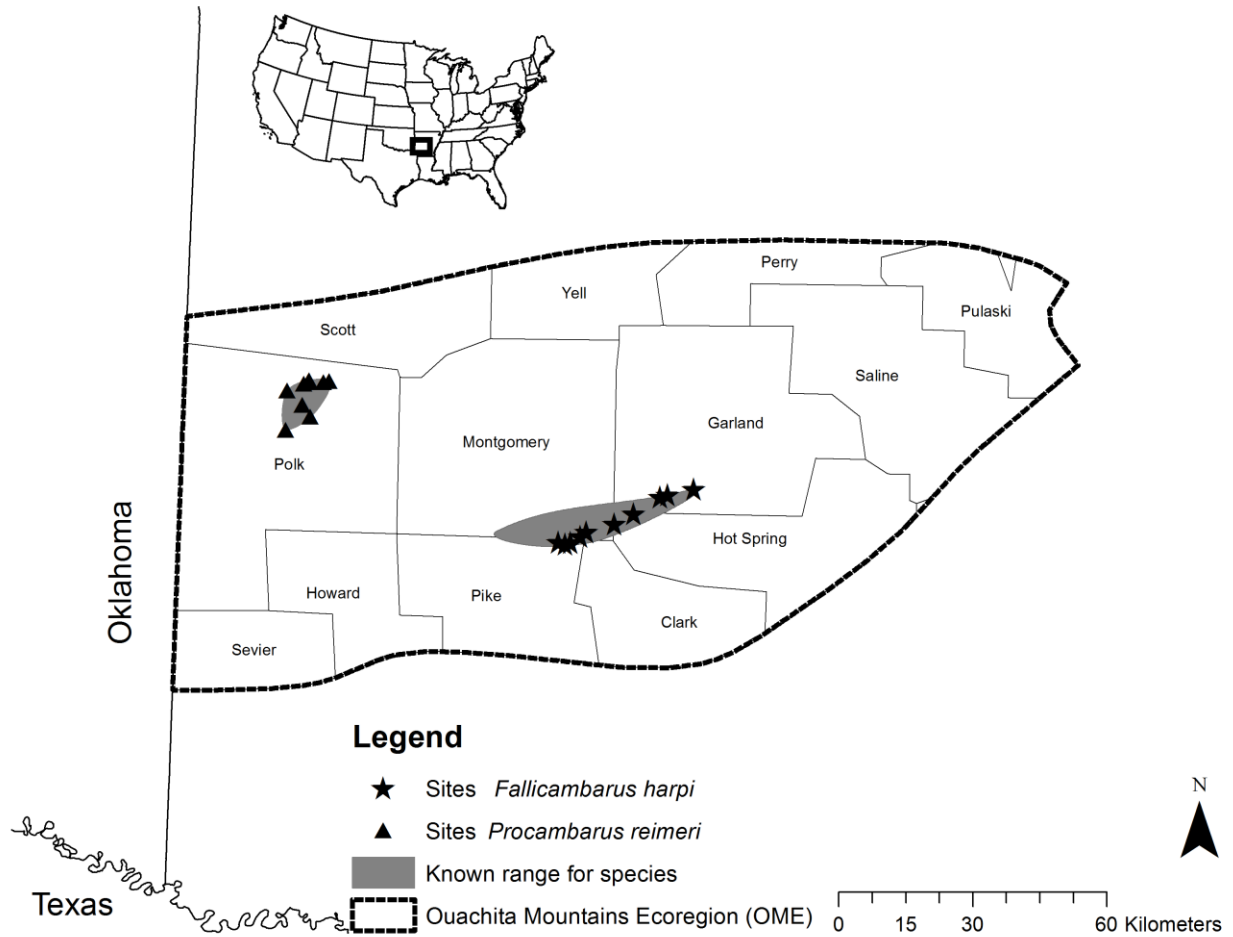

Figure 2.2: Estimated number of *Fallicambarus harpi* burrows/m<sup>2</sup> in relation to the percent tree canopy cover over a quadrat (A). The shaded area indicates the 95% confidence interval (CI) of burrow counts in relation to the variable canopy. Mean (95% CI) number of burrows in quadrats with and without sedges (B).

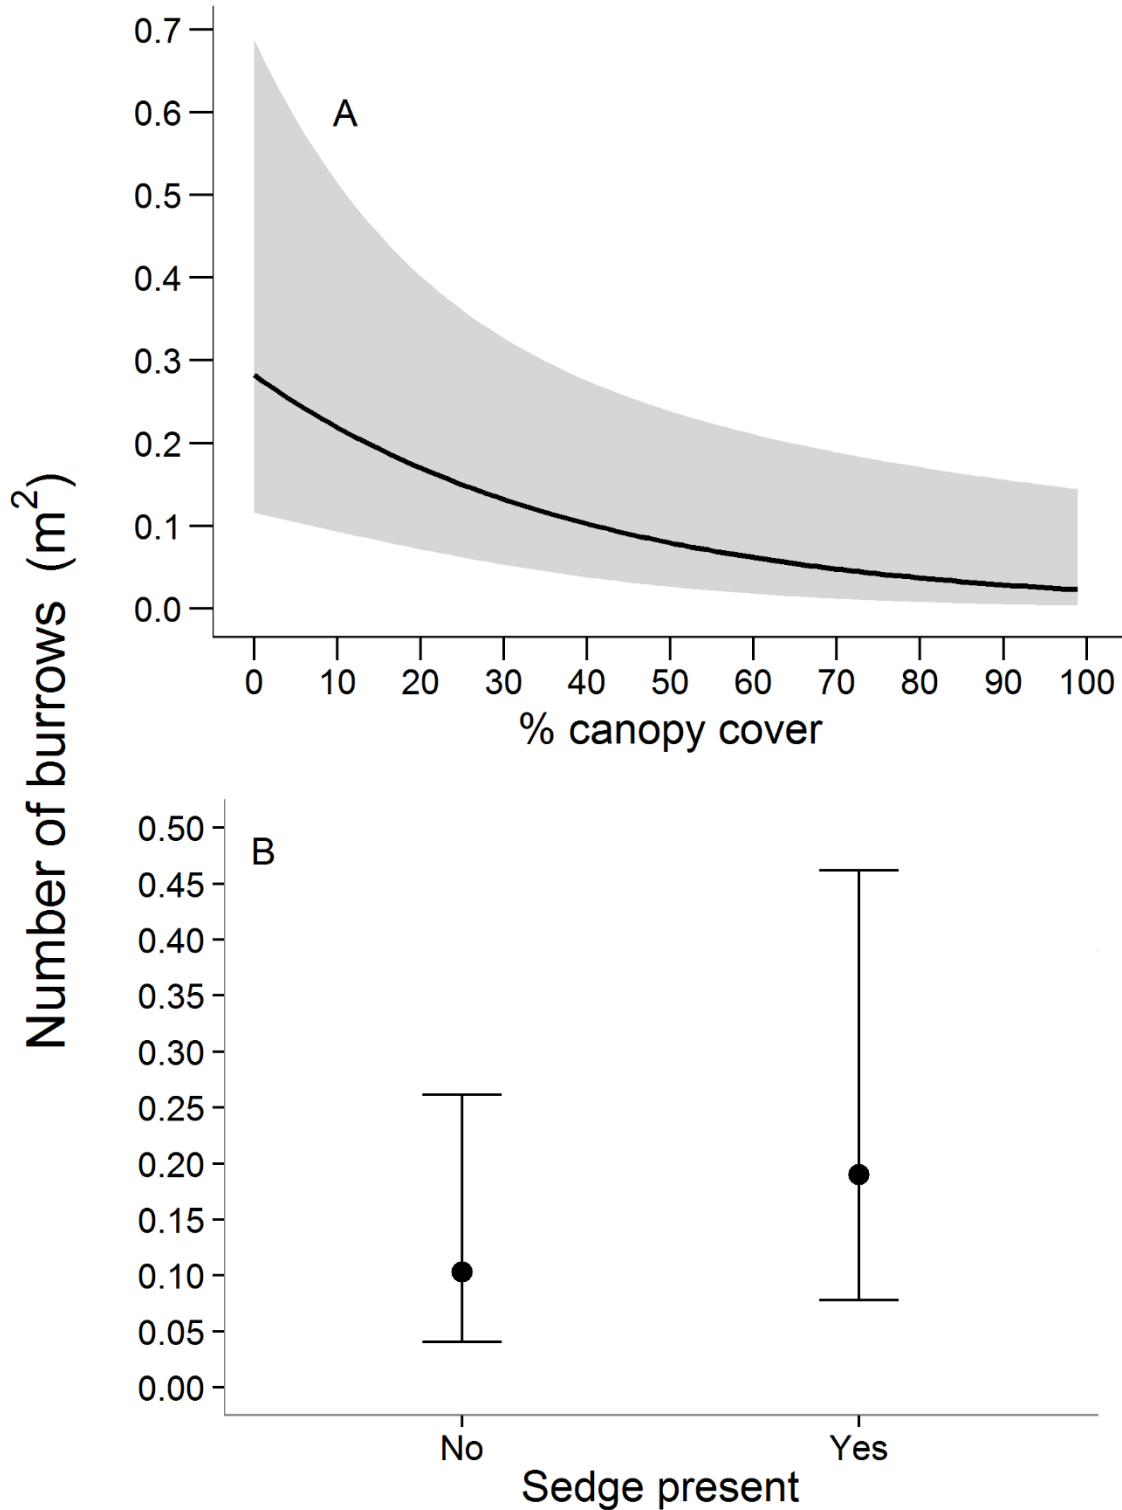

Figure 2.3: Estimated number of *Procambarus reimeri* burrows/m<sup>2</sup> in relation to the percent tree canopy cover over a quadrat (A). The shaded area indicates the 95% confidence interval (CI) of burrow counts in relation to the variable canopy. Mean (95% CI) number of burrows in quadrats with and without sedges (B).

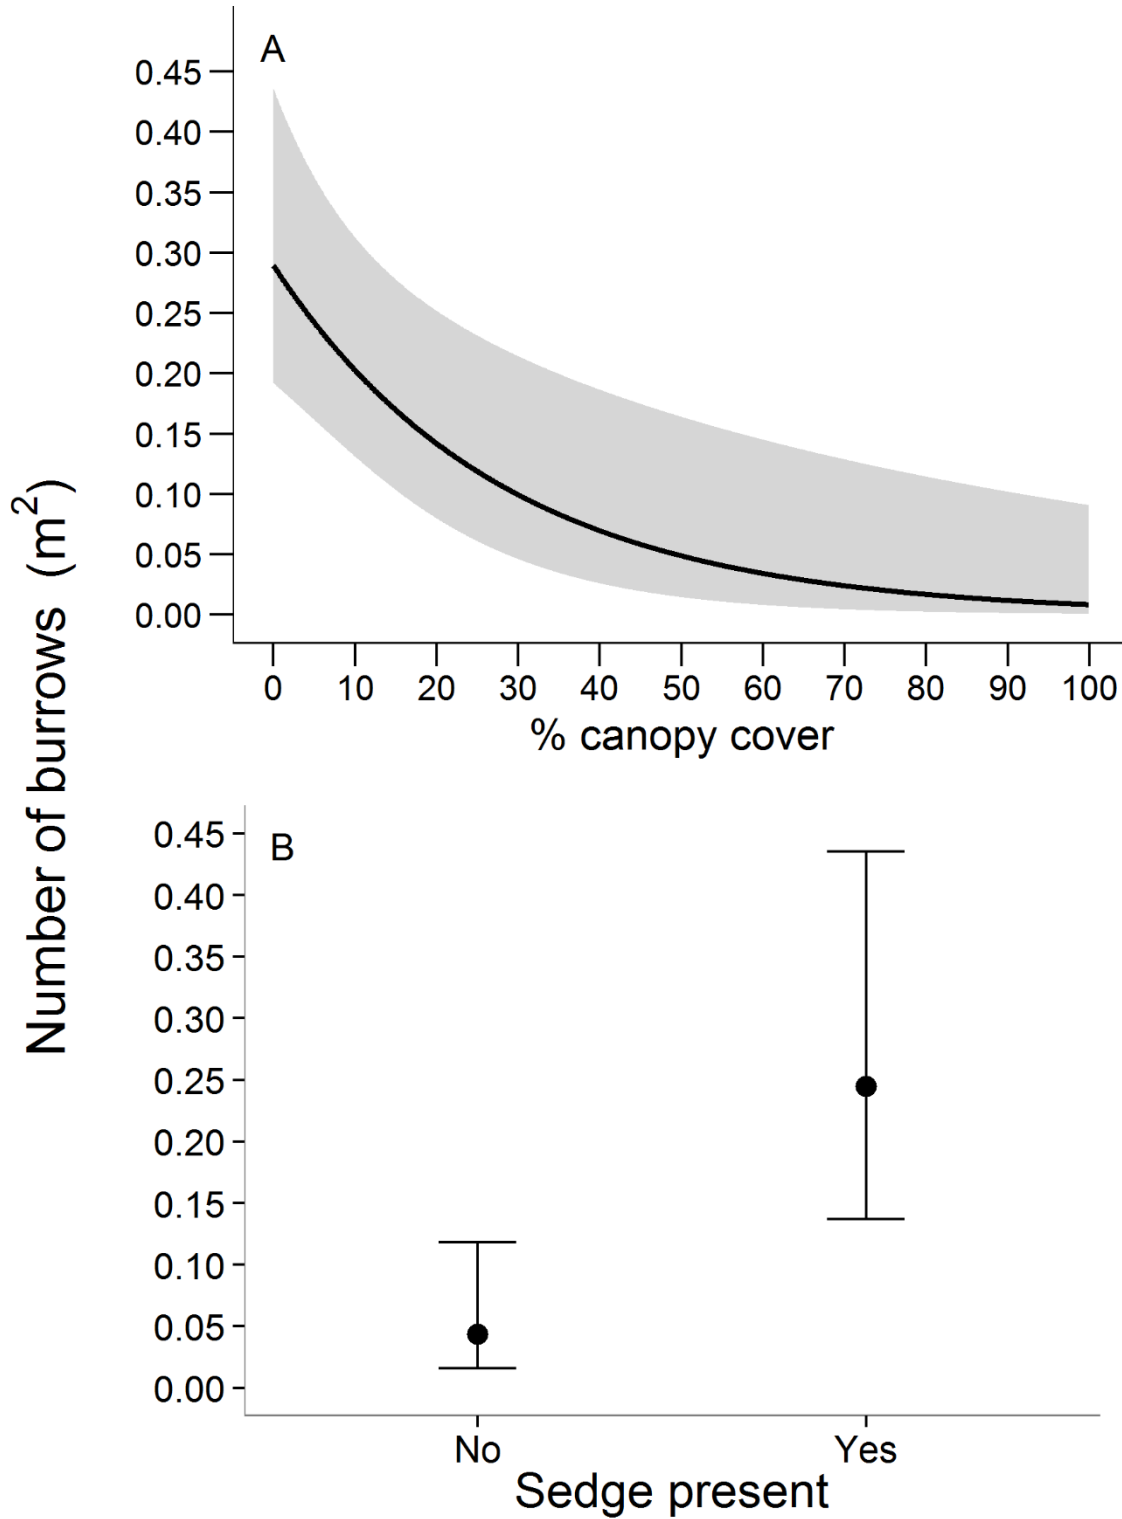



Figure 2.4: Soil texture plot for soil samples collected in the spring 2014. Cl = clay, SiCl = silty clay, SaCl = sandy clay, ClLo = clay loam, SiClLo = silty clay loam, SaClLo = sandy clay loam, Lo = loam, SiLo = silty loam, SaLo = sandy loam, Si = silt, Sa = sand, and LoSa = loamy sand. Texture classes follow those of US Department of Agriculture (Soil Survey Staff 1993). Classes obscured by data points are loam (lower center of figure) and silty loam (lower right of figure).

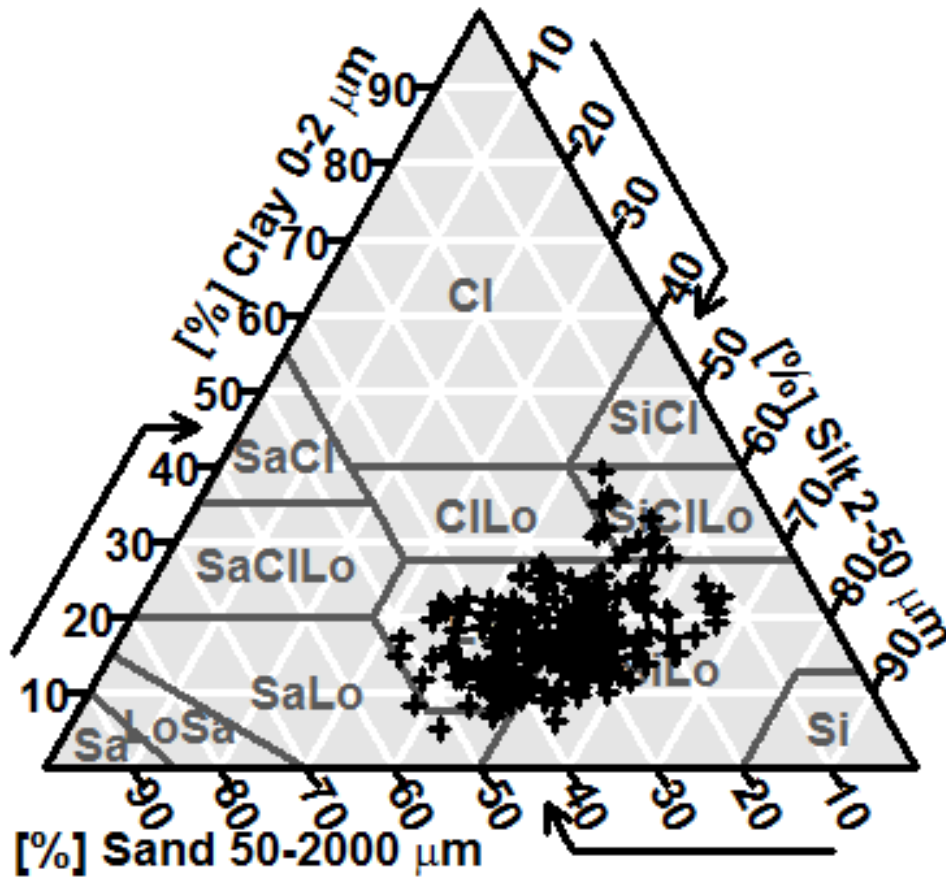

**Table 2.1: Variables and their descriptions for a generalized linear mixed-model analysis of the habitat of two primary burrowing crayfishes in Arkansas (*Fallicambarus harpi* and *Procambarus reimeri*). Quadrats were 1 m<sup>2</sup>.**

| <b>Variable</b>     | <b>Description</b>                                                                                                                                                                                                                                 |
|---------------------|----------------------------------------------------------------------------------------------------------------------------------------------------------------------------------------------------------------------------------------------------|
| <b>Water_trans</b>  | Presence of standing water in the length of the 50-m transect (binary: yes/no)                                                                                                                                                                     |
| <b>Sedge</b>        | Presence of hydrophilic sedge in quadrat (binary: yes/no)                                                                                                                                                                                          |
| <b>Canopy</b>       | % tree canopy cover taken at each quadrat                                                                                                                                                                                                          |
| <b>Herb</b>         | % herbaceous ground cover taken at each quadrat                                                                                                                                                                                                    |
| <b>Stem</b>         | Stem-density count taken at each quadrat                                                                                                                                                                                                           |
| <b>Elevation</b>    | Elevation calculated at each quadrat location (National Elevation Dataset, resolution 10 m; <a href="http://ned.usgs.gov/">http://ned.usgs.gov/</a> )                                                                                              |
| <b>Solar</b>        | Incoming solar radiation value (watt-hour/m <sup>2</sup> ) calculated at each quadrat location based on direct and diffuse insolation from the unobstructed sky directions (ArcGIS, Environmental System Research Institute, Redlands, California) |
| <b>Water_dist</b>   | Euclidean distance to nearest waterbody calculated for each quadrat location (National Hydrography Dataset; <a href="http://nhd.usgs.gov/index.html">http://nhd.usgs.gov/index.html</a> )                                                          |
| <b>CTI</b>          | Compound topographic index value calculated for each quadrat location (Evans et al. 2010)                                                                                                                                                          |
| <b>Soil1, Soil2</b> | Transformed soil composition (% sand, silt, clay) value calculated for each soil sample (van den Boogaart et al. 2014)                                                                                                                             |

**Table 2.2: Candidate models and hypotheses tested in the generalized linear mixed-model analysis for *Fallicambarus harpi* and *Procambarus reimeri* in Arkansas. The response variable used in each model was burrow abundance in each 1-m<sup>2</sup> quadrat. See Table 2.1 for variable names.**

| <b>Model name:</b>   | <b>Variables</b>                                                                                  | <b>Hypothesis</b>                                                                                                                                                           |
|----------------------|---------------------------------------------------------------------------------------------------|-----------------------------------------------------------------------------------------------------------------------------------------------------------------------------|
| <b>Mod 1(global)</b> | Water_trans + sedge + canopy + herb + stem + elevation + solar + water_dist + CTI + soil1 + soil2 | Crayfish selection based on transect- and quadrat-level wetness characteristics, canopy cover, herbaceous community, erosion potential, topographic position, and soil cues |
| <b>Mod 2</b>         | Canopy + sedge                                                                                    | Crayfish selection based on canopy cover and quadrat-level wetness                                                                                                          |
| <b>Mod 3</b>         | Water_trans + sedge + solar + water_dist                                                          | Crayfish selection based on transect- and quadrat-level wetness characteristics and topographic position                                                                    |
| <b>Mod 4</b>         | Water_trans + sedge + CTI                                                                         | Crayfish selection based on transect- and quadrat-level wetness characteristics and topographic position                                                                    |
| <b>Mod 5</b>         | Water_dist + CTI                                                                                  | Crayfish selection based on topographic position                                                                                                                            |
| <b>Mod 6</b>         | Solar + CTI                                                                                       | Crayfish selection based on topographic position                                                                                                                            |
| <b>Mod 7</b>         | Elevation + water_dist                                                                            | Crayfish selection based on topographic position                                                                                                                            |
| <b>Mod 8</b>         | Sedge + stem                                                                                      | Crayfish selection based on herbaceous community                                                                                                                            |
| <b>Mod 9</b>         | Canopy + herb                                                                                     | Crayfish selection based on canopy and herbaceous community                                                                                                                 |
| <b>Mod 10</b>        | Herb + soil1 + soil2                                                                              | Crayfish selection based on herbaceous community and soil cues                                                                                                              |
| <b>Mod 11</b>        | Canopy + soil1 + soil2 + sedge                                                                    | Crayfish selection based on canopy cover, soil cues, and quadrat-level wetness                                                                                              |
| <b>Mod 12</b>        | Canopy + solar + soil1 + soil2                                                                    | Crayfish selection based on canopy cover, solar radiation potential, and soil cues                                                                                          |
| <b>Mod 13</b>        | Canopy + sedge + stem                                                                             | Crayfish selection based on canopy cover, quadrat-level wetness, and erosion potential                                                                                      |
| <b>Mod 14</b>        | Soil1 + soil2 + water_trans                                                                       | Crayfish selection based on soil cues and transect-level wetness                                                                                                            |
| <b>Mod 15</b>        | Canopy                                                                                            | Crayfish selection based on canopy cover                                                                                                                                    |
| <b>Mod 16</b>        | Soil1 + soil2                                                                                     | Crayfish selection based on soil cues                                                                                                                                       |
| <b>Mod 17</b>        | Solar                                                                                             | Crayfish selection based on solar radiation potential                                                                                                                       |

**Table 2.3: Model name, number of model parameters (K), Akaike’s Information Criterion adjusted for small sample size (AICc), difference in AICc ( $\Delta$ AICc), Akaike weights ( $w_i$ ), and log likelihood (LL) for the top habitat models ( $\Delta$ AICc < 4) from a suite of variables modeled with a generalized linear mixed-model analysis for two primary burrowing crayfish species, *Fallicambarus harpi* ( $n = 210$  quadrats) and *Procambarus reimeri* ( $n = 222$  quadrats) in Arkansas. See Tables 2.1 and 2.2 for a description of each model and the variables included.**

| <b>Model</b>               | <b>K</b> | <b>AICc</b> | <b><math>\Delta</math>AICc</b> | <b><math>w_i</math></b> | <b>LL</b> |
|----------------------------|----------|-------------|--------------------------------|-------------------------|-----------|
| <i>Fallicambarus harpi</i> |          |             |                                |                         |           |
| <b>Mod 11</b>              | 7        | 374.63      | 0                              | 0.50                    | -180.04   |
| <b>Mod 2</b>               | 5        | 375.99      | 1.36                           | 0.26                    | -182.85   |
| <b>Mod 13</b>              | 6        | 377.92      | 3.29                           | 0.10                    | -182.76   |
| <i>Procambarus reimeri</i> |          |             |                                |                         |           |
| <b>Mod 2</b>               | 5        | 285.6       | 0                              | 0.67                    | -137.66   |
| <b>Mod 13</b>              | 6        | 287.7       | 2.11                           | 0.23                    | -137.66   |
| <b>Mod 11</b>              | 7        | 289.42      | 3.82                           | 0.1                     | -137.45   |

**Table 2.4: Unbiased model-averaged parameter estimates of the top models (Table 2.3) for two primary burrowing crayfishes species (*Fallicambarus harpi* and *Procambarus reimeri*) in Arkansas. See Table 2.1 for a description of the variables included. Sedge1 = presence of sedge in quadrat, CL = confidence limits.**

| Variable                   | Model-averaged estimate (SE) | 95% CL         | p >  z |
|----------------------------|------------------------------|----------------|--------|
| <i>Fallicambarus harpi</i> |                              |                |        |
| Canopy                     | -1.003 (0.3863)              | -1.761, -0.246 | 0.009  |
| Sedge1                     | 0.546 (0.239)                | 0.077, 1.015   | 0.071  |
| Stem                       | 0.045 (0.105)                | -0.161, 0.250  | 0.899  |
| Soil1                      | 0.1436 (0.125)               | -0.102, 0.388  | 0.509  |
| Soil2                      | -0.293 (0.127)               | -0.542, -0.044 | 0.364  |
| Intercept                  | -2.183 (0.485)               | -3.135, -1.232 | –      |
| <i>Procambarus reimeri</i> |                              |                |        |
| Canopy                     | -1.317 (0.468)               | -2.234, -0.401 | 0.005  |
| Sedge1                     | 1.727 (0.474)                | 0.797, 2.656   | 0.0002 |
| Stem                       | 0.003 (0.073)                | -0.281, 0.306  | 0.968  |
| Soil1                      | 0.003 (0.047)                | -0.258, 0.320  | 0.948  |
| Soil2                      | 0.007 (0.059)                | -0.272, 0.414  | 0.905  |
| Intercept                  | -3.135 (0.513)               | -4.140, -2.130 | –      |

## LITERATURE CITED

- Adams, L. W., and A. D. Geis. 1983. Effects of roads on small mammals. *Journal of Applied Ecology* 20:403–415.
- Akaike, H. 1974. A new look at the statistical model identification. *IEEE Transactions on Automatic Control* 19:716–723.
- Altrichter, M., and G. I. Boaglio. 2004. Distribution and relative abundance of peccaries in the Argentine Chaco: associations with human factors. *Biological Conservation* 116:217–225.
- Andrews, A. 1990. Fragmentation of habitat by roads and utility corridors: a review. *Australian Zoologist* 26:130–141.
- Ashley, E. P., and J. T. Robinson. 1996. Road mortality of amphibians, reptiles and other wildlife on the Long Point Causeway, Lake Erie, Ontario. *Canadian Field Naturalist* 110:403–412.
- Barbaresi, S., E. Tricarico, and F. Gherardi. 2004. Factors inducing the intense burrowing activity of the red-swamp crayfish, *Procambarus clarkii*, an invasive species. *Die Naturwissenschaften* 91:342–345.
- Barton, K. 2014. MuMIn: multi-model inference. R Project for Statistical Computing, Vienna, Austria. (Available from: <http://cran.r-project.org/package=MuMIn>)
- Bates, D., M. Maechler, B. Bolker, and S. Walker. 2014. lme4: linear mixed-effects models using ‘Eigen’ and S4. R Project for Statistical Computing, Vienna, Austria. (Available from: <http://cran.r-project.org/package=lme4>)

- Berger, R. L. 2005. Integrated roadside vegetation management: a synthesis of highway practice. NCHRP Synthesis 341. Transportation Research Board, Washington, DC. (Available from: <http://www.trb.org/Publications/Blurbs/155791.aspx>)
- Berrill, M., and B. Chenoworth. 1982. The burrowing ability of nonburrowing crayfish. *American Midland Naturalist* 108:199–201.
- Burnham, K. P., and D. R. Anderson. 2002. Model selection and multimodel inference: a practical information-theoretic approach. 2<sup>nd</sup> edition. Springer, New York.
- Eastham, J., P. R. Scott, and R. Steckis. 1994. Components of the water balance for tree species under evaluation for agroforestry to control salinity in the wheatbelt of Western Australia. *Agroforestry Systems* 26:157–169.
- Egozcue, J. J., V. Pawlowsky-Glahn, G. Mateu-Figueras, and C. Barceló-Vidal. 2003. Isometric logratio transformations for compositional data analysis. *Mathematical Geology* 35:279–300.
- Evans, J., J. Oakleaf, S. Cushman, and D. Theobald. 2010. An ArcGIS toolbox for surface gradient and geomorphic modeling, version a1.0. (Available from: <http://evansmurphy.wix.com/evansspatial#!arcgis-gradient-metrics-toolbox/crro>)
- Fahrig, L., and T. Rytwinski. 2009. Effects of roads on animal abundance: an empirical review and synthesis. *Ecology and Society* 14:397–405.
- Forman, R. T. T., D. Sperling, J. A. Bissonette, A. P. Clevenger, C. D. Cutshall, V. H. Dale, L. Fahrig, R. France, C. R. Goldman, K. Heanue, J. A. Jones, F. J. Swanson, T. Turrentine, and T. C. Winter. 2003. Road ecology: science and solutions. Island Press, Washington, DC.

- Gelbard, J. L., and J. Belnap. 2003. Roads as conduits for exotic plant invasions in a semiarid landscape. *Conservation Biology* 17:420–432.
- Grow, L., and H. Merchant. 1980. The burrow habitat of the crayfish, *Cambarus diogenes diogenes* (Girard). *American Midland Naturalist* 103:231–237.
- Helms, B., W. Budnick, P. Pecora, J. Skipper, E. Kosnicki, J. Feminella, and J. Stoeckel. 2013. The influence of soil type, congeneric cues, and floodplain connectivity on the local distribution of the devil crayfish (*Cambarus diogenes* Girard). *Freshwater Science* 32:1333–1344.
- Hlass, L. J., W. L. Fisher, and D. J. Turton. 1998. Use of the index of biotic integrity to assess water quality in forested streams of the Ouachita Mountains Ecoregion, Arkansas. *Journal of Freshwater Ecology* 13:181–192.
- Hobbs, H. H. 1981. The crayfishes of Georgia. *Smithsonian Contributions to Zoology* 318. Smithsonian Institution Press, Washington, DC.
- Hobbs, H. H., and S. A. Rewolinski. 1985. Notes on the burrowing crayfish *Procambarus (Girardiella) gracilis* (Bundy) (Decapoda, Cambaridae) from Southeastern Wisconsin, U.S.A. *Crustaceana* 48:26–33.
- Hobbs, H. H., and M. Whiteman. 1991. Notes on the burrows, behavior, and color of the crayfish *Fallicambarus (F.) devastator* (Decapoda: Cambaridae). *Southwestern Naturalist* 36:127–135.
- Johnston, C. E., and C. Figiel. 1997. Microhabitat parameters and life-history characteristics of *Fallicambarus gordonii* Fitzpatrick, a crayfish associated with pitcher-plant bogs in Southern Mississippi. *Journal of Crustacean Biology* 17:687–691.



- Lode, T. 2000. Effect of a motorway on mortality and isolation of wildlife populations. *AMBIO: A Journal of the Human Environment* 29:163–166.
- Loughman, Z. J. 2010. Ecology of *Cambarus dubius* (upland burrowing crayfish) in north-central West Virginia. *Southeastern Naturalist* 9:217–230.
- Loughman, Z. J., T. P. Simon, and S. A. Welsh. 2012. Occupancy rates of primary burrowing crayfish in natural and disturbed large river bottomlands. *Journal of Crustacean Biology* 32:557–564.
- Luckacs, P. M., K. P. Burnham, and D. R. Anderson. 2009. Model selection bias and Freedman's paradox. *Annals of the Institute of Statistical Mathematics* 62:117–125.
- MacDonald, L. H., R. W. Sampson, and D. M. Anderson. 2001. Runoff and road erosion at the plot and road segment scales, St John, US Virgin Islands. *Earth Surface Processes and Landforms* 26:251–272.
- Mcgrath, C. 1994. Status survey for the Greensboro burrowing crayfish. *Proceedings of the Annual Conference of the Southeastern Association of Fish and Wildlife Agencies* 48:343–349.
- Miser, H. D. 1929. Structure of the Ouachita Mountains of Oklahoma and Arkansas. *Oklahoma Geological Survey Bulletin* 50:1–30.
- Moeys, J. 2015. soiltexture: Functions for Soil Texture Plot, Classification and Transformation. R package version 1.3.3. <http://CRAN.R-project.org/package=soiltexture>
- Norrocky, M. J. 1991. Observations on the ecology, reproduction and growth of the burrowing crayfish *Fallicambarus (Creaserinus) fodiens* (Decapoda: Cambaridae) in north-central Ohio. *American Midland Naturalist* 125:75–86.

- Oxley, D. J., M. B. Fenton, and G. R. Carmody. 1974. The effects of roads on populations of small mammals. *Journal of Applied Ecology* 11:51–59.
- Peris, S. J., and M. Pescador. 2004. Effects of traffic noise on passerine populations in Mediterranean wooded pastures. *Applied Acoustics* 65:357–366.
- Phillips, J. D., and D. A. Marion. 2005. Biomechanical effects, lithological variations, and local pedodiversity in some forest soils of Arkansas. *Geoderma* 124:73–89.
- Pocock, Z., and R. E. Lawrence. 2005. How far into a forest does the effect of a road extend? Defining road edge effect in eucalypt forests of south-eastern Australia. Pages 397–405 in C. L. Irwin, P. Garrett, and K.P. McDermott (editors). *Proceedings of the 2005 International Conference on Ecology and Transportation*. Center for Transportation and the Environment, North Carolina State University, Raleigh, North Carolina.
- Richardson, J. H., R. F. Shore, and J. R. Treweek. 1997. Are major roads a barrier to small mammals? *Journal of Zoology* 243:840–846.
- Riley, S. P. D., J. P. Pollinger, R. M. Sauvajot, E. C. York, C. Bromley, T. K. Fuller, and R. K. Wayne. 2006. A southern California freeway is a physical and social barrier to gene flow in carnivores. *Molecular Ecology* 15:1733–1741.
- Robison, H. W. 2008. Distribution, life history aspects, and conservation status of three Ouachita Mountain crayfishes: *Procambarus tenuis*, *P. reimeri*, and *Orconectes menae*. U.S.D.A. Forest Service, Ouachita National Forest. Hot Springs, Arkansas.
- Robison, H. W., and B. Crump. 2004. Distribution, natural history aspects, and status of the Arkansas endemic crayfish, *Fallicambarus harpi* Hobbs and Robison, 1985. *Journal of the Arkansas Academy of Science* 58:91–94.

- Rosa, S., and J. Bissonette. 2007. Roads and desert small mammal communities: positive interaction? Pages 351–365 in C. L. Irwin, D. Nelson, and K.P. McDermott (editors). Proceedings of the 2007 International Conference on Ecology and Transportation. Center for Transportation and the Environment, North Carolina State University, Raleigh, North Carolina.
- Rytwinski, T., and L. Fahrig. 2013. Why are some animal populations unaffected or positively affected by roads? *Oecologia (Berlin)* 173:1143–1156.
- Schütz, W. 2000. Ecology of seed dormancy and germination in sedges (*Carex*). *Perspectives in Plant Ecology, Evolution, and Systematics* 3:67–89.
- Semlitsch, R. D., T. J. Ryan, K. Hamed, M. Chatfield, B. Drehman, N. Pekarek, M. Spath, and A. Watland. 2007. Salamander abundance along road edges and within abandoned logging roads in Appalachian forests. *Conservation Biology* 21:159–167.
- Soil Survey Division Staff. 1993. Soil survey manual. Handbook 1. Soil Conservation Service, US Department of Agriculture, Washington, DC. (Available from: [http://www.nrcs.usda.gov/Internet/FSE\\_DOCUMENTS/nrcs142p2\\_050993.pdf](http://www.nrcs.usda.gov/Internet/FSE_DOCUMENTS/nrcs142p2_050993.pdf))
- Sommer, T. R. 1983. Laboratory and field studies on the toxic effects of thiobencarb (Bolero) to the crawfish (*Procambarus clarkii*). *Journal of the World Mariculture Society* 14:434–440.
- Spellerberg, I. F. 1998. Ecological effects of roads and traffic: a literature review. *Global Ecology and Biogeography* 7:317–333.
- Taylor, C. A. , G. A. Schuster, J. E. Cooper , R. J. DiStefano, A. G. Eversole, P. Hamr, H. H. Hobbs III, H. W. Robison, C. E. Skelton, and R. F. Thoma. 2007. A Reassessment of the

- Conservation Status of Crayfishes of the United States and Canada after 10+ Years of Increased Awareness. *Fisheries* 32:8 372-389.
- Thorpe, A., and R. M. Harrison. 2008. Sources and properties of non-exhaust particulate matter from road traffic: a review. *Science of the Total Environment* 400:270–282.
- van den Boogaart, K. G., R. Tolosana, and M. Bren. 2014. *compositions: compositional data analysis*. R Project for Statistical Computing, Vienna, Austria. (Available from: <http://cran.r-project.org/package=compositions>)
- Ward, R. L., J. T. Anderson, and J. T. Petty. 2008. Effects of road crossings on stream and streamside salamanders. *Journal of Wildlife Management* 72:760–771.
- Watkins, R. Z., J. Chen, J. Pickens, and K. D. Brosofske. 2003. Effects of forest roads on understory plants in a managed hardwood landscape. *Conservation Biology* 17:411–419.
- Welch, S. M., and A. G. Eversole. 2006. The occurrence of primary burrowing crayfish in terrestrial habitat. *Biological Conservation* 130:458–464.
- Williams, J. D., M. L. Warren Jr., K. S. Cummings, J. L. Harris, and R. J. Neves. 1993. Conservation status of freshwater mussels of the United States and Canada. *Fisheries* 18(9):6-22.
- Woods, A. J., T. L. Foti, S. S. Chapman, J. M. Omernik, J. A. Wise, E. O. Murray, W. L. Prior, J. B. J. Pagan, J. A. Comstock, and M. Radford. 2004. Ecoregions of Arkansas (color poster with map, descriptive text, summary tables, and photographs). US Geological Survey map scale 1:1,000,000. US Geological Survey, Reston, Virginia. (Available from: [http://archive.epa.gov/wed/ecoregions/web/html/ar\\_eco.html](http://archive.epa.gov/wed/ecoregions/web/html/ar_eco.html))

## CHAPTER 3: FIELD VALIDATION OF MAXENT MODELING OF TWO NARROWLY ENDEMIC CRAYFISHES

### INTRODUCTION

Understanding the factors influencing species distributions and habitat selection are critical to researchers (Baldwin 2009). For example, rare or narrowly endemic plants and animals are difficult to monitor and conserve when their total distribution and habitat preferences are not completely known. One method used in this research is species distribution models (SDMs). SDMs are correlative models using environmental and/or geographic information to explain observed patterns of species occurrences (Elith and Graham 2009). SDMs can provide useful information for exploring and predicting species distributions across the landscape (Elith et al. 2011). Models estimated from species observations can also be applied to produce measures of habitat suitability (Franklin 2013). This information can be useful for detecting unknown populations of rare, endemic, or threatened species (e.g. Williams et al. 2009, Rebelo and Jones 2010, Peterman et al. 2013, Searcy and Shaffer 2014, Fois et al. 2015). Due to the wide range of applications and open-access spatial databases (e.g. National Elevation Dataset <http://ned.usgs.gov/> and National Hydrography Dataset <http://nhd.usgs.gov/index.html>), SDMs rank among the most widely reviewed topics in the ecological literature (Araújo and Peterson 2012). SDMs can also limit search efforts by selecting suitable sampling areas *a priori*, leading to a cost-effective and efficient use of sampling effort (Fois et al. 2015). One of the most widely used SDMs in recent years is the program Maxent (Kramer-Schadt et al. 2013).

Maxent is a presence-only modeling algorithm using a set of known occurrences together with predictor variables such as topographic, climatic, edaphic, biogeographic, and remotely sensed variables (Phillips et al. 2006, Phillips and Dudík 2008). These data are used to predict the relative occurrence rate of a focal species across a predefined landscape (Fithian and Hastie

2013). Recent studies focusing on the performance of Maxent have revealed it to perform well in comparison to other SDMs (Elith et al. 2006). Maxent also performs well with small sample sizes (e.g. Hernandez et al. 2006, Pearson et al. 2007, Wisz et al. 2008), rare species (e.g. Williams et al. 2009, Rebelo and Jones 2010), narrowly endemic species (e.g. Rinnhofer et al. 2012), and when used as a habitat suitability index (Latif et al. 2015).

In all of the above applications, the potential for the inaccurate execution and interpretation of an SDM is well documented (e.g. Araújo and Guisan 2006, Baldwin 2009, Yackulic et al. 2013, Guillera-Arroita et al. 2014). Specific issues surrounding the interpretation of Maxent analyses include sampling bias (Phillips and Dudík 2008, Boria et al. 2014) and the lack of techniques to assess model quality (Hijmans 2012), overfitting of model predictions (Elith et al. 2010, Warren and Seifert 2011), or assessment of detection probabilities (Lahoz-Monfort et al. 2014). With these issues in mind we created our models carefully: we used a null model approach to assess model quality (Raes and ter Steege 2007), we used the R package ENMeval (Muscarella et al. 2014) to balance model fit, and we sampled at the time of highest burrow detectability (spring 2015; Rhoden et al. *in press*). The utility of Maxent has also been burdened with issues of model validation (Hijmans 2012). Most model validation methods involve subsets of the input data with the predictions generated by the models (Rebelo and Jones 2010). Historically, validation of Maxent predictions has lacked an independent assessment of model performance (Greaves et al. 2006) such as a novel set of presence locations. The need for independent validation is especially important for rare species exhibiting a wider knowledge gap in distribution than more common species (Rebelo and Jones 2010). North American primary burrowing crayfishes are a group of poorly understood and understudied taxon for which SDMs

could provide novel insight into distributions and habitat relationships, and thus provide an excellent case study for validation.

North America has the highest diversity of crayfishes worldwide (Taylor et al. 2007). Within North America, 22% of the species listed as endangered or threatened in a recent conservation review of crayfishes were primary burrowing crayfishes (Taylor et al. 2007). These listings were based upon the American Fisheries Society Endangered Species Committee, which follows the criteria of Williams et al. (1993). It is hypothesized all crayfishes have the ability to construct refugia by way of burrowing down into the soil or substrate (Berrill and Chenoworth, 1982; Hobbs, 1981). Hobbs (1981) described three classes of burrowing crayfishes based on differences in natural history: tertiary, secondary, and primary burrowers. Tertiary burrowers dig shallow burrows only to escape frost or seek shelter and when the body of water they are inhabiting dries up. Secondary burrowers spend much of their lives in their burrows; however, they do move out into open water occasionally, and their burrows normally have a connection to an open, permanent water body. Primary burrowing crayfishes spend their complete life cycle underground. As primary burrowers leave their burrows only to forage and find a burrow of the opposite sex for mating (Hobbs 1981), their burrows are rarely tied to permanent open water.

Amongst the three types of burrowers, the least is known regarding the natural history of primary burrowing crayfishes (Moore et al. 2013; Taylor et al. 2007) due to the challenges in sampling these largely fossorial animals (Larson and Olden 2010). However, the narrowly endemic nature of North American crayfishes is well documented (Morehouse and Tobler, 2013; Page, 1985; Simmons and Fraley, 2010; Taylor et al. 2007). Primary burrowing crayfishes in Arkansas are no exception (Robison et al. 2008). Of the 12 species of primary burrowers in Arkansas (*Fallicambarus dissitus*, *F. fodiens*, *F. gilpini*, *F. harpi*, *F. jeanae*, *F. petilicarpus*, *F.*

*strawni*, *Procambarus curdi*, *P. liberorum*, *P. parasimulans*, *P. regalis*, and *P. reimeri*), ten (83%) are known from three or fewer ecoregions, with six (50%) known from only one ecoregion. The limited geographic distribution of any taxa makes them more vulnerable to localized extirpation. Because these animals occur at such a constrained geographic scale, it is important to understand and document the existing distribution to manage and preserve current populations.

The rarity of and difficulties surrounding the collection of natural history information, specifically habitat suitability, make primary burrowing crayfishes ideal candidates for SDM. To test the ability of SDMs to predict the distribution of suitable habitat for two narrowly endemic habitat specialists, we constructed SDMs for *F. harpi* and *P. reimeri* and validated the models using independent sampling data. These species are vulnerable to population declines and are currently recorded under the Endangered (*P. reimeri*) and Vulnerable (*F. harpi*) conservation status categories (Taylor et al. 2007) based on modifications to or reductions of habitat in their already restricted ranges. Additionally, these species were included in a recent petition filed by the privately funded Center for Biological Diversity for protection under the Federal Endangered Species Act.

## METHODS

### Study Area

Our study sites were located in the Ouachita and Caddo River drainages of southwestern Arkansas in the Ouachita Mountains Ecoregion (OME; Woods et al. 2004). The remnant pine-bluestem (*Pinus-Schizachyrium*) communities (Phillips and Marion 2005) and silty loam soil (Hlass et al. 1998) make this region of Arkansas ideal habitat for primary burrowing crayfishes



and in fact has the highest diversity of primary burrowing crayfishes in the entire state with six species (*Fallicambarus harpi*, *F. jeanae*, *F. strawni*, *Procambarus liberorum*, *P. parasimulans*, and *P. reimeri*). We sampled thirteen counties encompassing the known range of both species of primary burrowing crayfish: from east to west, those counties were Pulaski, Saline, Perry, Garland, Hot Spring, Clark, Yell, Montgomery, Pike, Scott, Howard, Polk, and Sevier (**Fig. 3.1**).

### **Presence data and environmental variables**

To determine habitat requirements of *F. harpi* and *P. reimeri*, we queried natural history museums or databases (Illinois Natural History Survey Crustacean Collection, the National Museum of Natural History Smithsonian Institution, and the Arkansas Department of Natural Heritage) for historic locations of both species, and a subset of those locations were visited (Rhoden et al. *in press*). At each location, we measured the following suite of habitat variables: percent tree canopy cover, percent herbaceous ground cover, stem density, the number of burrows, presence of standing water at the site, remotely sensed variables and the presence or absence of hydrophilic sedges. We found canopy cover and the presence of hydrophilic sedges were the most important factors in predicting crayfish abundance (Rhoden et al. *in press*).

The environmental variables used for the SDM analysis consisted of canopy cover, elevation, distance to nearest waterbody, compound topographic index value (CTI), and solar radiation value (**Table 3.1**). Canopy cover was estimated using a United States Forest Service percent canopy raster (National Land Cover Database 2011). Elevation was estimated using a United States Geological Survey digital elevation map (DEM; 10 m). Distance to nearest water body was estimated by constructing a raster of the Euclidean distance from all permanent waterbodies. Compound topographic index values were determined using the Geomorphometry and Gradient Metrics (version a1.0) toolbox; this metric is a function of both the slope and the

upstream contributing area per unit width orthogonal to the flow direction (Evans et al. 2010). CTI is a steady state wetness index, where a larger CTI value represents areas that are topographically suitable for water accumulation. We measured solar radiation by calculating the watt-hour/m<sup>2</sup> of the delineated sampling area using the Area Solar Radiation tool in ArcMap (**Table 3.1**). These habitat variables reflect habitat characteristics associated with *F. harpi* (Robison and Crump 2004) and *P. reimeri* (Robison 2008), and other primary burrowing crayfish species (Hobbs 1981, Welch and Eversole 2006, Loughman et al. 2012). These values were calculated using digital elevation maps (National Elevation Dataset <http://ned.usgs.gov/> accessed 07/21/2014) and surface water maps (National Hydrography Dataset <http://nhd.usgs.gov/index.html> accessed 07/21/2014). The entire OME was used as a delineation for both species of crayfish in the SDM analysis. Each surface was resampled to a common resolution of 30 m to match the resolution of the canopy surface.

### **Maxent analysis**

Upon gathering the presence localities and calculating rasters of pertinent habitat variables (canopy cover, CTI, elevation, solar radiation, and distance to nearest waterbody), we created our distribution models, refined our models, tested the models against a null model and generated two final SDMs. The SDM algorithm used was Maxent (version 3.3.3k; Phillips et al. 2006). Along with the presence localities of each species, we incorporated 2500 background points to create our models. These points were randomly generated within a 10 km<sup>2</sup> polygon situated around each historic museum locality sampled in the field. A 10 km<sup>2</sup> buffer was used due to the distance between sites and the relative size of the area in which we projected our Maxent predictions (the OME). This approach followed Peterman et al. (2013) and was

implemented to reduce model bias as described by Phillips (2008). The initial model fit was assessed using the area under the receiver operator curve (AUC).

Upon calculation of the initial Maxent models, a comparison of spatial predictions was conducted with the ENMeval package (Muscarella et al. 2014) in program R (R Development Core Team 2014). ENMeval analysis of *F. harpi* identified a betamultiplier of 2.5 and a linear quadratic hinge feature to provide the most parsimonious fit to our data. ENMeval analysis of *P. reimeri* identified a betamultiplier of 1.5 and a linear quadratic hinge feature to provide the most parsimonious fit to our data. Spatial predictions were then re-run using the refined regularization multiplier and feature classes to increase the rigor in building and evaluating our SDMs based on presence-only data.

The refined models' performance was determined using the null model approach of Raes and ter Steege (2007) using ENMtools (Warren et al. 2010). We generated two groups of 999 random data sets containing 56 and 50 samples, which corresponded to the number of presence locations used for *F. harpi* and *P. reimeri* (respectively) in the initial model. These points were drawn without replacement from the OME delineation used in the initial model. Both model AUC values were compared to the 95 percentile of the null AUC frequency distribution.

The final Maxent models were calculated with the maximum number of iterations set to 5000 and the analysis of variable importance was measured by jackknife and response curves. The bootstrap form of replication was used. These settings, the refined regularization multiplier and feature classes, and the recommended default values were used for our final Maxent model runs. Due to the narrowly endemic nature of both species and the small amount of presence locations in the initial model, we did not include a bias file or spatial filtering.

## Field sampling and validation

The refined Maxent models (one for *F. harpi* and one for *P. reimeri*) were used to select 80 semi-random sampling sites for each species within the OME. These sites were semi-random because we restricted our sampling to areas of public access (roadside ditches). The Maxent output for both species was placed into four categories based on the relative occurrence rate (ROR; Fithian and Hastie 2013). The first category ranged from 0 to the lowest presence threshold (LPT) of each species (Pearson et al. 2007). The LPT is the smallest logistic value associated with one of the observed species localities. The second class ranged from the LPT to 50% of the maximum ROR of each species. The third category ranged from 50% of the maximum ROR to 75% of the maximum ROR of each species. The fourth category ranged from 75% of the maximum ROR to the maximum ROR of each species.

The final Maxent model outputs for both species were placed into the described categories in ArcMap. A polygon in ArcMap represented each category. Any polygon representing a single pixel or island (one 30 m x 30 m area) was removed. All category polygons were then overlaid with a layer representing the public right of ways and other public areas (state parks, natural areas, etc.). We generated 40 random points in each category polygon using the final polygon layer. All points within each category polygon had a spatial buffer of 2 km and were checked before sampling to ensure accessibility. If a point was inaccessible in the field, the next closest accessible point within the respected category was chosen and sampled. To assess the accuracy of the Maxent predictions, we calculated the receiver operating characteristic (ROC) and the AUC for the ROR of occupied quadrats vs. the ROR of unoccupied quadrats (Fawcett 2006) with the pROC package in program R (Robin et al. 2011). A ROC graph is a technique for visualizing, organizing and selecting classifiers based on their performance

(Fawcett 2006). A ROC plot displays the performance of a binary classification method (presence/absence) with a continuous (Maxent prediction) ordinal output (Robin et al. 2011). Furthermore, the ROC plot shows the sensitivity (proportion of correctly classified positive observations) and specificity (the proportion of correctly classified negative observations) as the output threshold is moved over the range of all possible values (Robin et al. 2011).

Field sampling occurred in March and April of 2015, the period of peak activity for both *F. harpi* and *P. reimeri* (Robison and Crump 2004). At each sampling point, one 50-m linear transect was searched for the presence of burrows in six 1-m<sup>2</sup> quadrats placed at 10 m intervals along each transect. Within a sampling polygon, the area surrounding the transect was also thoroughly searched for burrows (**Fig. 3.2**). If burrows were present along the transect, quadrat, or within the vicinity of the transect, animals were captured by hand excavation using a hand shovel to slowly dig around the burrow entrance and inserting one's arm into the burrow feeling for the crayfish. This method was chosen over other methods due to the success rate and limited amount of time spent at each burrow location (Ridge et al. 2008). Voucher specimens of crayfishes collected were deposited into the Illinois Natural History Survey Crustacean Collection.

## RESULTS

### Presence data

The presence locations used for the Maxent analysis, based on the field surveys of 2014, consisted of 58 locations for *F. harpi* (of which 56 were used for the SDM analysis) and 53 locations for *P. reimeri* (of which 50 were used for the SDM analysis). To minimize spatial autocorrelation, a subset of the original presence data was used. All duplicate presence locations

falling within the same cell of a 30 m resolution raster were removed before the SDM analysis. The selected presence locations used for the SDM analysis were near (<90 m) primary and secondary roadways.

### **Maxent analysis**

The AUC converged to 0.959 and 0.976 for the final *F. harpi* and *P. reimeri* models, respectively. Both models were significantly better than the random AUC estimations from the null models ( $p < 0.001$ ). Of the parameters included in the model, canopy cover was the variable with the highest percent contribution for both species (48.8% and 47.2% *F. harpi* and *P. reimeri*, respectively; **Table 3.2**). Both species showed a steady decline in the probability of presence as canopy cover increased. The variable with the highest gain when used in isolation was elevation for both species (**Table 3.2**). An elevation between 150 m and 200 m was most suitable for *F. harpi* and between 300 m and 350 m was most suitable for *P. reimeri*. The concentration of the highest ROR was centered around the presence locations for both species (**Fig. 3.3**). The LPT was 0.07 for *F. harpi* and 0.26 for *P. reimeri*. In the *F. harpi* model, 10% of the area in the OME was predicted to be above the LPT. In the *P. reimeri* model, 2% of the OME was predicted to be above the LPT (**Table 3.3**).

### **Field sampling and validation**

Most (89% for *F. harpi* and 98% for *P. reimeri*) of the land area in the OME was in the first (lowest ROR) category (**Table 3.3**). No individuals of either species were caught in areas predicted below the LPT (category 1). Most (74%) of the presence locations for *F. harpi* were in category 4 (**Table 3.3**). The presence locations for *P. reimeri* were more evenly distributed between categories 2, 3, and 4 (**Table 3.3**). *Fallicambarus harpi* was captured in 19 of the 480

quadrats surveyed for the species (**Fig. 3.4**). *Procambarus reimeri* was captured in 41 of the 480 quadrats surveyed for the species (**Fig. 3.4**). We counted 70 burrows for each *F. harpi* and *P. reimeri*. The historic range of *F. harpi* was extended by 2.8 km to the north and 3.2 km to the south of its historic range while the historic range of *P. reimeri* was extended by 51.6 km to the east, 12.1 km to the south, and 19.2 km to the west of its historic range. Thus, the total range for both species was approximately 265 km<sup>2</sup> for *F. harpi* and 1467 km<sup>2</sup> for *P. reimeri* using a minimum convex polygon approach in ArcGIS encompassing all known capture localities from both years and historic museum data.

The AUC for the *F. harpi* field validation was 80.96 (73.94-87.98). The AUC for the *P. reimeri* field validation was 70.5 (63.33 – 77.67). The ROC plot, AUC, and 95% confidence intervals for each model are shown in **Figure 3.4**. The threshold values (prediction with the highest specificity and sensitivity) were 0.68 and 0.57 for *F. harpi* and *P. reimeri*, respectively.

## DISCUSSION

We found SDMs to be a useful tool to predict the occurrence and distribution of suitable habitat of two narrowly endemic, burrowing crayfish species in Arkansas. We used Maxent along with a suite of functions to assess model fit and safeguard against potential pitfalls associated with the Maxent program (Phillips and Dudík 2008, Elith et al. 2010, Warren and Seifert 2011, Hijmans 2012, Lahoz-Monfort et al. 2014). We also used biologically relative habitat information at a constrained geographic scale to increase the accuracy of our predictions (Guisan and Thuiller 2005). These habitat variables and the scale at which we delineated them were a result of previous field sampling and analysis of habitat preference of both species (Rhoden et al. *in press*), which revealed both crayfish to be microhabitat specialists; using open, low-herbaceous microhabitats. We validated the model through a stratified sampling of our

Maxent model predictions based on the LPT and the maximum ROR. We then equally sampled each category across the entire OME. This validation resulted in the range expansion of both species and the discovery of new populations. The models performed well by directing sampling efforts to treeless areas on the landscape that tended to have greater predicted probabilities of occurrence. However, the models did a poor job of identifying the wet, low-herbaceous microhabitats most frequently associated with occurrence in the field and previous studies (Robison and Crump 2004, Robison 2008, Rhoden et al. *in press*).

The use of the LPT to determine the threshold between the probability of presence or absence at any given predicted output location (Pearson et al. 2007) is well documented (Rinnhofer et al. 2012, Boria et al. 2014, Fois et al. 2015). We successfully used this value in our field validation techniques: no animal was captured in an area predicted below the LPT (**Table 3.3**). The land area above the LPT for the *F. harpi* model comprised 10% of the Ouachita Mountain Ecoregion (OME) and 2% for the *P. reimeri* model in Arkansas. The ROC analysis identified threshold values of 0.68 and 0.57 for the *F. harpi* and *P. reimeri* models, respectively, which optimized the sensitivity and specificity of our model (Robin et al. 2011). These values are far more conservative than the LPT and are based on the field validation results from both species. Using the threshold metrics, the area predicted as suitable habitat for *F. harpi* and *P. reimeri* is less than 1% of the OME. We recommend the use of this threshold based on the ROC analysis for a more fine-tuned sampling effort for high-quality habitat for both species in the future.

Our SDMs used fine-scale (30 m) rasters of relative biological variables (canopy cover, CTI, solar radiation, elevation, and distance to waterbody). In the past, it has been common to use coarse ( $\geq 1$  km) climatic data to construct models (e.g. Peterson 2001, Chunco et al. 2013,



Barnhart and Gillam 2014). The use of coarse-scale habitat variables in Maxent has been addressed in previous studies (Araújo and Guisan 2006, Jiménez-Alfaro et al. 2012). Others using fine-scale inputs have found new populations of other rare species such as the discovery of new breeding ponds for a salamander species in east central Illinois (*Ambystoma jeffersonianum*; Peterman et al. 2013). Using fine-scale rasters of specific habitat variables for narrowly endemic habitat specialists was more appropriate than the more general approach of coarse-scale climatic data due to the resolution one gains with specific habitat information and fine-scale inputs. We believe this resolution was necessary to capture elements of the microhabitat the crayfishes prefer, differentiating between suitable and unsuitable habitat at a scale to assess animals occurring within anthropogenically altered habitat situated in natural landscapes (roadside ditches).

The habitat attributes of sites in which animals were present consisted of treeless, wet, low-herbaceous microhabitats. The average canopy cover for the categories above the LPT (category 2, 3, and 4) was 17% for both species. The presence quadrats for both species had an average canopy cover of 5%. Hydrophilic sedges were present in over 90% of the quadrats having *F. harpi* and *P. reimeri*, however sedges were present in less than half of the quadrats predicted above the LPT (category 2, 3, and 4). The sites recorded as being above the LPT (categories 2, 3, and 4) not having the target species were treeless for the most part, however those sites did not exhibit a moist microhabitat. The Maxent models did not capture the perched water table observed across the landscape that has been associated with other primary burrowing crayfishes (Welch et al. 2007). It is likely the model did not capture these moist, low herbaceous habitats due to the variables chosen for the Maxent analysis (canopy cover, CTI, elevation, solar

radiation, and distance to nearest waterbody). Future studies could incorporate remotely sensed data to better identify these unique habitats.

Our study shows Maxent is an appropriate tool to analyze and discover populations of narrowly endemic species in the Ouachita Mountains of Arkansas. Our method of initially collecting habitat data using museum records in the spring of 2014 added precision to our presence locations used for analysis. Our initial surveys also added valuable information regarding the habitat preferences of both *F. harpi* and *P. reimeri*, which in turn guided the selection of our habitat variables for both models. Our concentrated search efforts resulted in the discovery of five new populations of *F. harpi* and 16 new populations of *P. reimeri* and range expansions of approximately 91 km<sup>2</sup> and 1404 km<sup>2</sup>, respectively. The discovery of new populations support the contention both species appear to be locally abundant where habitat is suitable for persistence will aid in the conservation of these rare species. This is accomplished by narrowing the knowledge gap in distribution information, adding localities for monitoring persistence in roadside ditches, and providing habitat preference information. All of these attributes are required for the refinement of conservation and management decisions. Constructing models followed by ground validation has added valuable habitat information to two spatially restricted, understudied species of primary burrowing crayfish in southwestern Arkansas and illustrates the effectiveness of such a strategy for other rare habitat specialists.

## TABLES AND FIGURES

**Table 3.1: Description, origin, resolution, general statistics, and units of environmental variables used in the Maxent analysis of two primary burrowing crayfish species (*Fallicambarus harpi* and *Procambarus reimeri*) in southwestern Arkansas.**

| <b>Variable</b>                      | <b>Description</b>                                                                                                                          | <b>Source</b>                                                                                            | <b>Resolution</b> | <b>Min/max(unit)</b>                           | <b>μ (sd)</b>   |
|--------------------------------------|---------------------------------------------------------------------------------------------------------------------------------------------|----------------------------------------------------------------------------------------------------------|-------------------|------------------------------------------------|-----------------|
| <b>Canopy cover</b>                  | Percent tree canopy cover                                                                                                                   | National Land Cover Database 2011 USFS                                                                   | 30 m              | 0/100<br>(% cover)                             | 52.23(43.48)    |
| <b>Elevation</b>                     | Digital elevation model of the study site                                                                                                   | USGS National Elevation Dataset                                                                          | 10 m              | 50.50/818.96<br>(m)                            | 229(100.85)     |
| <b>Distance to nearest waterbody</b> | Euclidean distance to nearest permanent waterbody across the study site                                                                     | ESRI Spatial Analyst Tools; National Hydrology Dataset composed of stream segments of study site         | 10 m              | 0/1740.26<br>(m)                               | 187.48(161.04)  |
| <b>Compound topographic index</b>    | A function of slope and the upstream contributing area per unit width orthogonal to the flow direction (Evans et al., 2010)                 | ArcGIS Geomorphometry and Gradient Metrics Toolbox 2.0 (Evans et. al., 2010); National Elevation Dataset | 10 m              | 2.67/27.58<br>(index value)                    | 7.58(1.94)      |
| <b>Solar radiation</b>               | Incoming solar radiation value (watt hours per m <sup>2</sup> ) based on direct and diffuse insolation from the unobstructed sky directions | ESRI Spatial Analyst Tools; National Elevation Dataset                                                   | 10 m              | 3542.41/6413.34<br>(watthours/m <sup>2</sup> ) | 5955.14(116.01) |

**Table 3.2: Percent contribution and permutation importance of each environmental variable analyzed in the final Maxent models for two primary burrowing crayfish species (*Fallicambarus harpi* and *Procambarus reimeri*) in southwestern Arkansas.**

| <i>Fallicambarus harpi</i>    |                      |                        |
|-------------------------------|----------------------|------------------------|
| Variable                      | Percent contribution | Permutation importance |
| Canopy                        | 48.8                 | 15.7                   |
| Elevation                     | 37.9                 | 56.3                   |
| CTI                           | 7.6                  | 2                      |
| Solar                         | 4                    | 25.4                   |
| Distance to nearest waterbody | 1.8                  | 0.6                    |
| <i>Procambarus reimeri</i>    |                      |                        |
| Variable                      | Percent contribution | Permutation importance |
| Canopy                        | 47.2                 | 27.5                   |
| Elevation                     | 39.8                 | 41.9                   |
| Distance to nearest waterbody | 7.1                  | 16.8                   |
| CTI                           | 5.5                  | 9                      |
| Solar                         | 0.4                  | 4.9                    |

**Table 3.3: (A) Threshold values (relative occurrence rate; ROR), land area (ha), and percentage of Ouachita Mountains Ecoregion (OME) of each relative occurrence category; and (B) number of presence and absence quadrats, average canopy cover (%) of quadrats sampled in each relative occurrence category, and percentage of quadrats in each relative occurrence category with sedges present from the field sampling based on Maxent models for two primary burrowing crayfish species (*Fallicambarus harpi* and *Procambarus reimeri*) in southwestern Arkansas.**

**A.**

| Species                    | Category 1  | Category 2  | Category 3  | Category 4  |
|----------------------------|-------------|-------------|-------------|-------------|
| <b>Thresholds (ROR)</b>    |             |             |             |             |
| <i>Fallicambarus harpi</i> | 0.00 – 0.07 | 0.07 – 0.44 | 0.44 – 0.66 | 0.66 – 0.88 |
| <i>Procambarus reimeri</i> | 0.00 – 0.26 | 0.26 – 0.42 | 0.42 – 0.64 | 0.64 – 0.85 |
| <b>Land area (ha)</b>      |             |             |             |             |
| <i>Fallicambarus harpi</i> | 1374105     | 143139      | 21894       | 4996        |
| <i>Procambarus reimeri</i> | 1515441     | 15209       | 9756        | 3728        |
| <b>Percentage of OME</b>   |             |             |             |             |
| <i>Fallicambarus harpi</i> | 89          | 9           | 1           | <1          |
| <i>Procambarus reimeri</i> | 98          | 1           | 1           | <1          |

**B.**

| Variable                   | Category 1 | Category 2 | Category 3 | Category 4 |
|----------------------------|------------|------------|------------|------------|
| <i>Fallicambarus harpi</i> |            |            |            |            |
| Present                    | 0          | 0          | 5          | 14         |
| Absent                     | 121        | 120        | 115        | 105        |
| Average Canopy Cover       | 34         | 26         | 16         | 7          |
| Percent Quad w/sedge       | 27         | 73         | 44         | 46         |
| <i>Procambarus reimeri</i> |            |            |            |            |
| Present                    | 0          | 12         | 14         | 15         |
| Absent                     | 122        | 106        | 106        | 105        |
| Average Canopy Cover       | 38         | 18         | 19         | 15         |
| Percent Quad w/sedge       | 51         | 55         | 63         | 45         |

**Figure 3.1: Map depicting the location of sites sampled in southwestern Arkansas in the spring of 2015 based on the predictions from a Maxent analysis of two primary burrowing crayfish species (*Fallicambarus harpi* and *Procambarus reimeri*).**

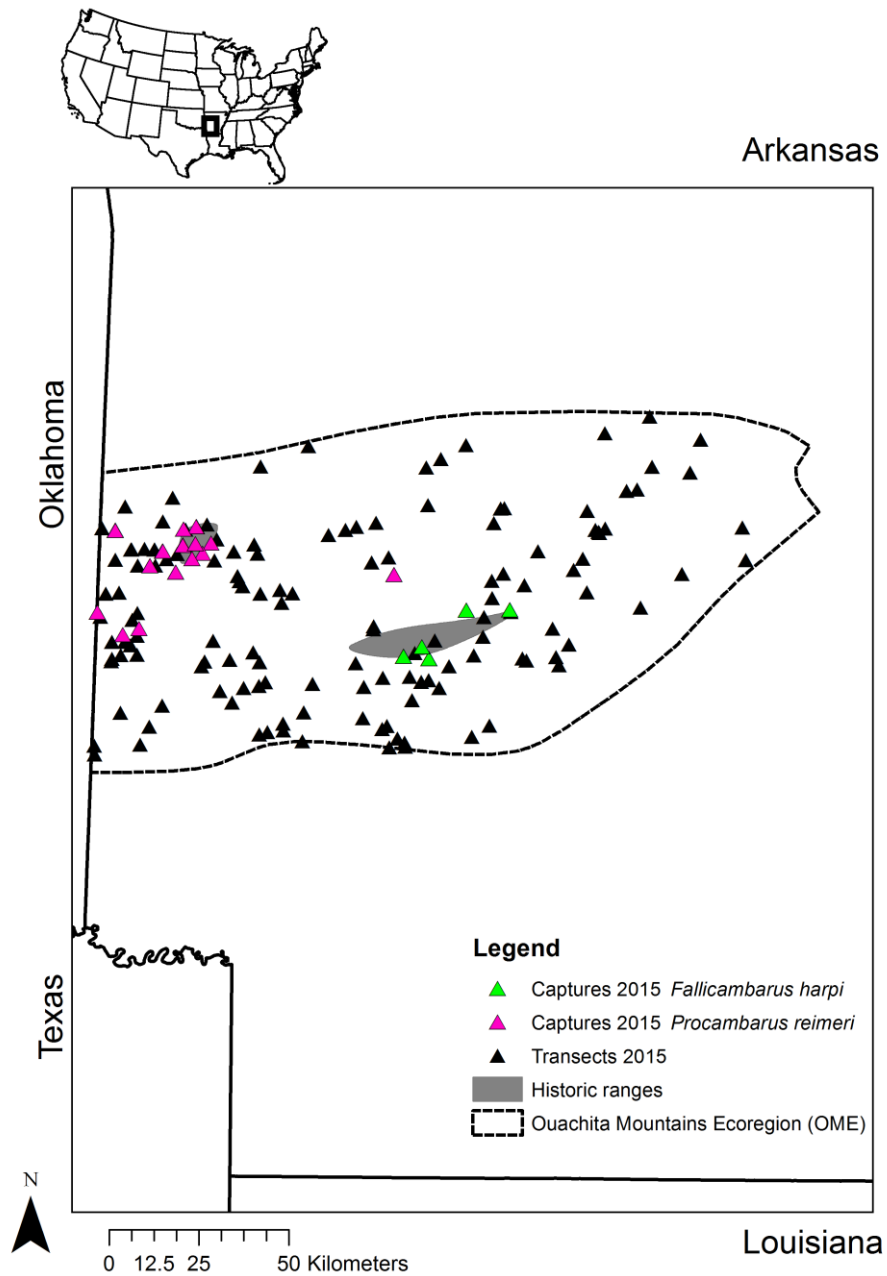

Figure 3.2: Map representing the sampling scheme based on the predictions from a Maxent analysis of two primary burrowing crayfish species (*Fallicambarus harpi* and *Procambarus reimeri*) in southwestern Arkansas in the spring of 2015. Each color (green, yellow, orange, and red) represents a relative occurrence category (1, 2, 3, 4) upon which the field validation sampling procedure was based. The black lines in the lower graphic depict 50-m transects used to assess presence or absence of the target species at each site. The linear, focused colors in the bottom graphic represent the accessible polygons in which the transect sampling was carried out.

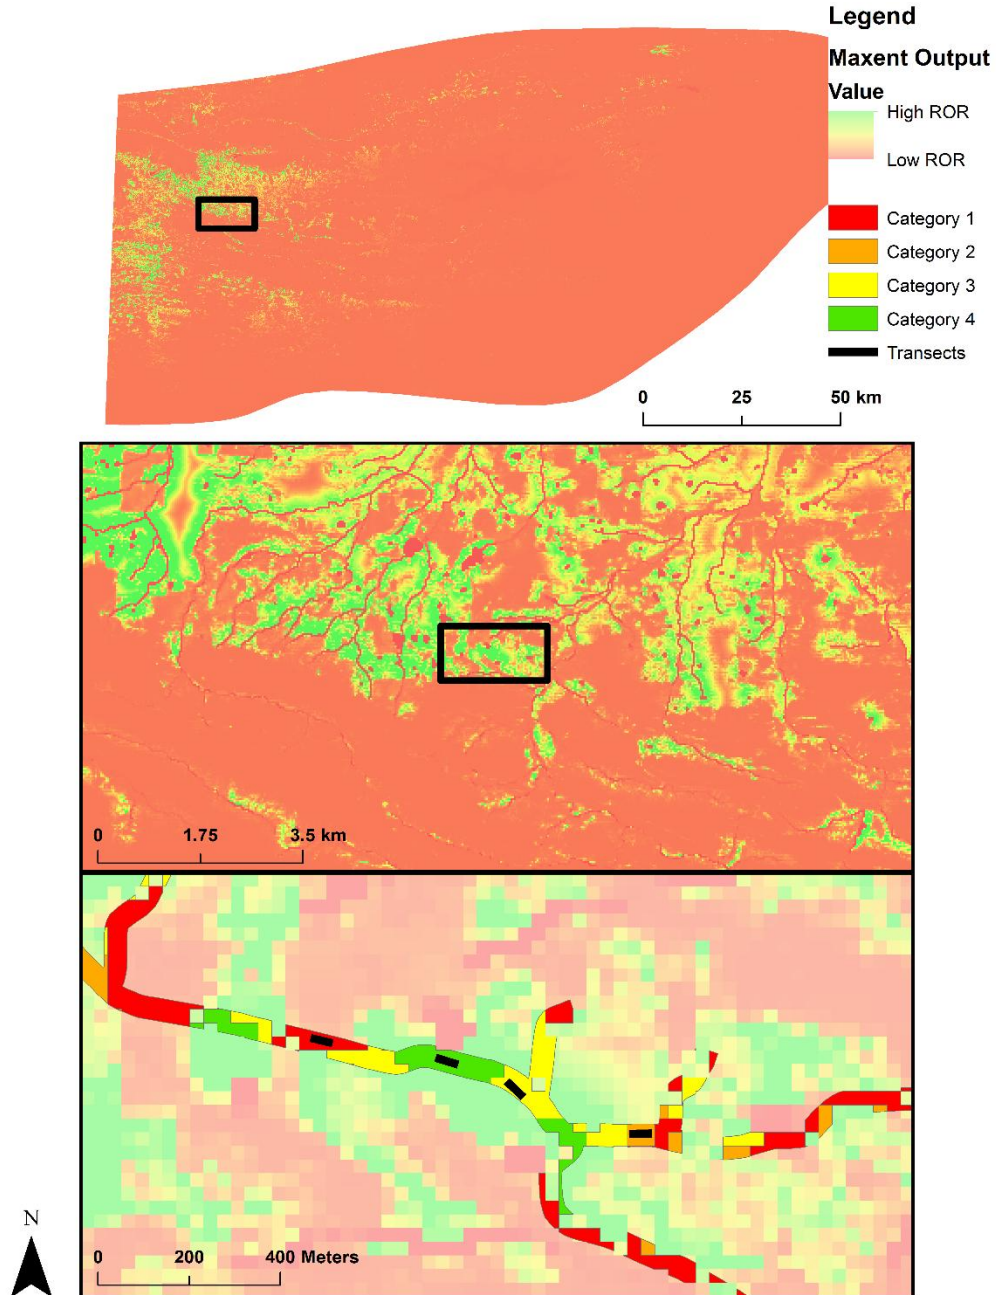

Figure 3.3: Projection of the Maxent models for (A) *Procambarus reimeri* and (B) *Fallicambarus harpi* onto the environmental variables (Table 3.1) used for analysis in southwestern Arkansas. The total shaded area represents the Ouachita Mountains Ecoregion (OME). Cooler colors show areas with better predicted conditions (relative occurrence rates [ROR]).

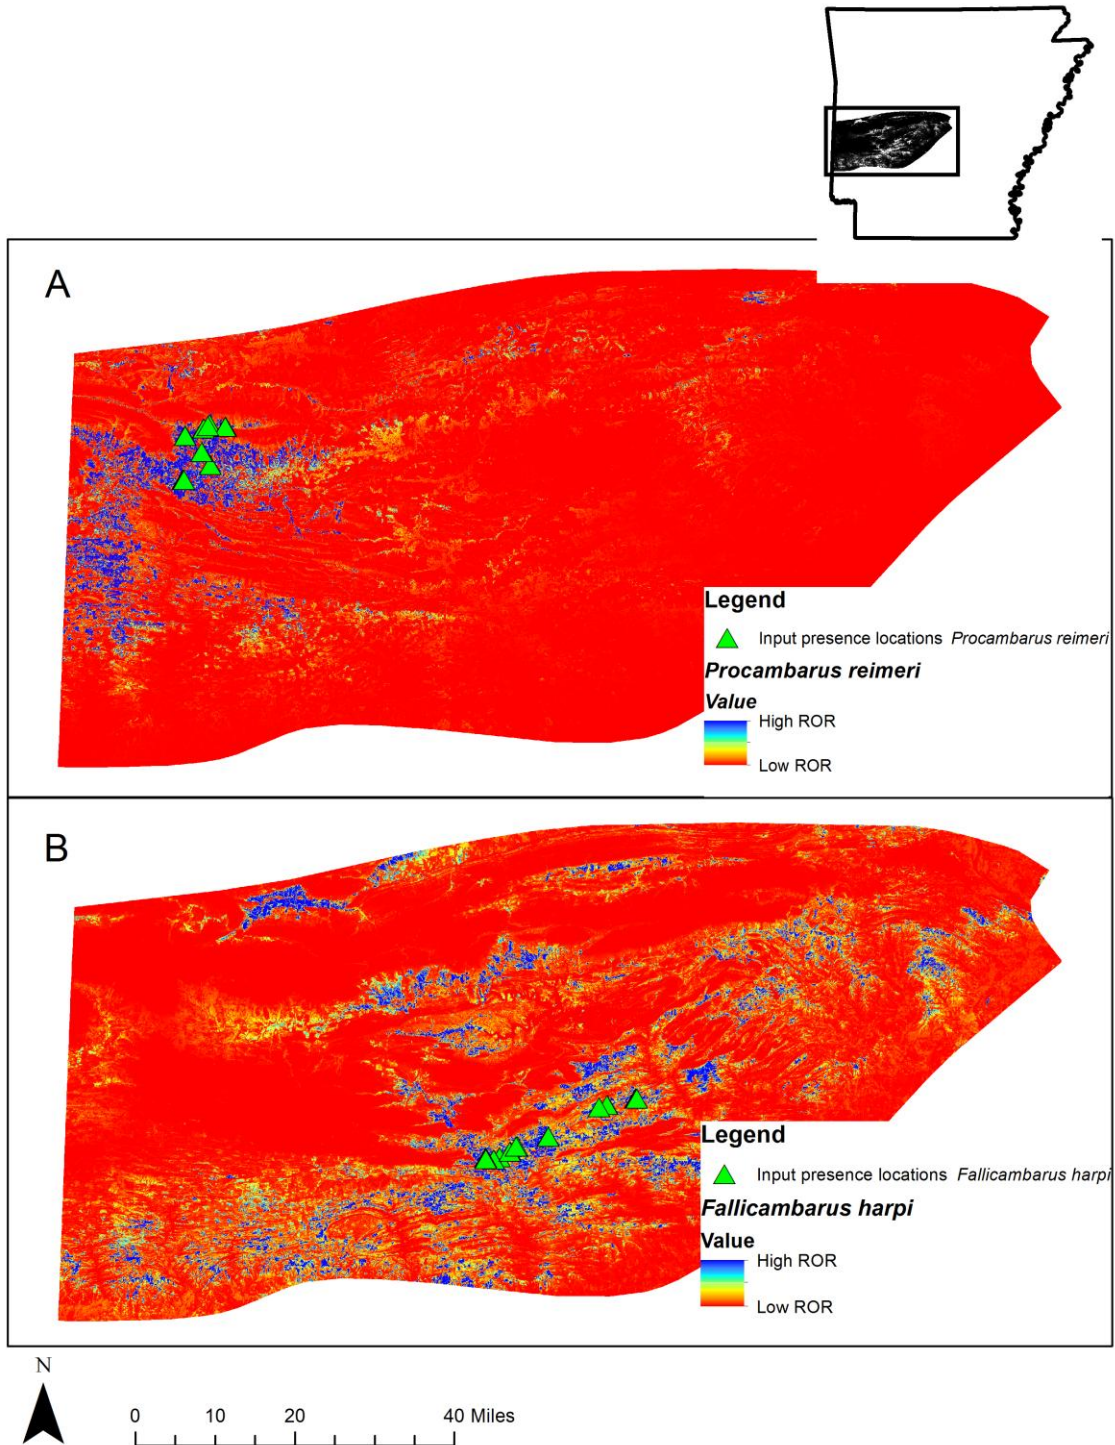



**Figure 3.4: ROC analysis for two primary burrowing crayfish species, *Fallicambarus harpi* (A) and *Procambarus reimeri* (B), in southwestern Arkansas. Input data derived from the predictions of two Maxent models and presence/absence data from field surveys conducted in the spring of 2015. The cross represents the 95% confidence interval and shaded bars represent the associated error for each ROC curve. AUC values are given with 95% confidence intervals in parenthesis. A higher AUC value depicts a better classification. Inset bar chart represents the percentage of quadrats (y-axis) in each category 1, 2, 3, and 4 (x-axis) that harbored each species of burrowing crayfish.**

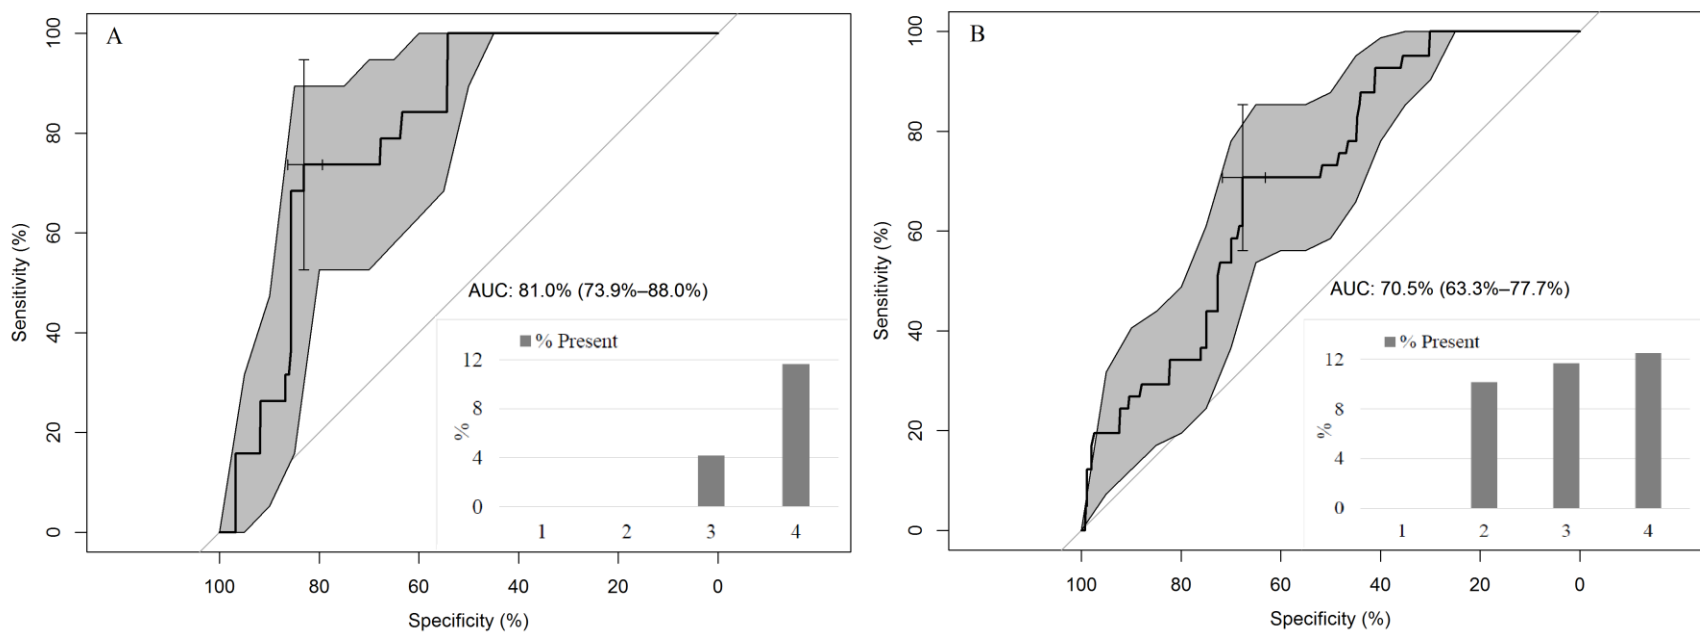

## LITERATURE CITED

- Araújo, M. B., and A. Guisan. 2006. Five (or so) challenges for species distribution modelling. *Journal of Biogeography* 33:1677–1688.
- Araújo, M. B., and A. T. Peterson. 2012. Uses and misuses of bioclimatic envelope modeling. *Ecology* 93(7):1527–1539.
- Baldwin, R. A. 2009. Use of maximum entropy modeling in wildlife research. *Entropy* 11:854–866.
- Barnhart, P. R., and E. H. Gillam. 2014. The Impact of Sampling Method on Maximum Entropy Species Distribution Modeling for Bats. *Acta Chiropterologica* 16:241–248.
- Berrill M. and B. Chenoweth. 1982. The burrowing ability of nonburrowing crayfish. *American Midland Naturalist* 108(1):199-201.
- Boria, R. A., L. E. Olson, S. M. Goodman, and R. P. Anderson. 2014. Spatial filtering to reduce sampling bias can improve the performance of ecological niche models. *Ecological Modelling* 275:73–77.
- Chunco, A. J., S. Phimmachak, N. Sivongxay, and B. L. Stuart. 2013. Predicting Environmental Suitability for a Rare and Threatened Species (Lao Newt, *Laotriton laoensis*) using Validated Species Distribution Models. *PLoS ONE* 8.
- Elith, J., C. H. Graham, R. P. Anderson, M. Dudík, S. Ferrier, A. Guisan, R. J. Hijmans, F. Huettmann, J. R. Leathwick, A. Lehmann, J. Li, L. G. Lohmann, B. A. Loiselle, G. Manion, C. Moritz, M. Nakamura, Y. Nakazawa, J. M. Overton, A. T. Peterson, S. J. Phillips, K. Richardson, R. E. Scachetti-Pereira, Ricardo S, Schapire, J. Soberon, S. Williams, M. S. Wisz, and N. E. Zimmermann. 2006. Novel methods improve prediction of species' distributions from occurrence data. *Ecography* 29:129–151.

- Elith, J., and C. H. Graham. 2009. Do they? How do they? Why do they differ? On finding reasons for differing performances of species distribution models. *Ecography* 32:66–77.
- Elith, J., M. Kearney, and S. Phillips. 2010. The art of modelling range-shifting species. *Methods in Ecology and Evolution* 1:330–342.
- Elith, J., S. J. Phillips, T. Hastie, M. Dudík, Y. E. Chee, and C. J. Yates. 2011. A statistical explanation of MaxEnt for ecologists. *Diversity and Distributions* 17:43–57.
- Evans, J., J. Oakleaf, S. Cushman, and D. Theobald. 2010. An ArcGIS toolbox for surface gradient and geomorphic modeling, version a1.0. (Available from: <http://evansmurphy.wix.com/evansspatial#!arcgis-gradient-metrics-toolbox/crro>)
- Fawcett, T. 2006. An introduction to ROC analysis. *Pattern Recognition Letters* 27:861–874.
- Fithian, W., and T. Hastie. 2013. Finite-sample equivalence in statistical models for presence-absence only data. *Annals of Applied Statistics* 7:1917–1939.
- Fois, M., G. Fenu, A. Cuenca Lombraña, D. Cogoni, and G. Bacchetta. 2015. A practical method to speed up the discovery of unknown populations using Species Distribution Models. *Journal for Nature Conservation* 24:42–48.
- Franklin, J. 2013. Species distribution models in conservation biogeography: developments and challenges. *Diversity and Distributions* 19:1217–1223.
- Greaves, G. J., R. Mathieu, and P. J. Seddon. 2006. Predictive modelling and ground validation of the spatial distribution of the New Zealand long-tailed bat (*Chalinolobus tuberculatus*). *Biological Conservation* 132:211–221.
- Guillera-Arroita, G., J. J. Lahoz-Monfort, and J. Elith. 2014. Maxent is not a presence-absence method: a comment on Thibaud et al. R. B. O’Hara, editor. *Methods in Ecology and Evolution* 5:1192–1197.

- Guisan, A., and W. Thuiller. 2005. Predicting species distribution: Offering more than simple habitat models. *Ecology Letters* 8:993–1009.
- Hernandez, P. A., C. H. Graham, L. L. Master, and D. L. Albert. 2006. The effect of sample size and species characteristics on performance of different species distribution modeling methods. *Ecography* 29:773–785.
- Hijmans, R. J. 2012. Cross-validation of species distribution models: Removing spatial sorting bias and calibration with a null model. *Ecology* 93:679–688.
- Hlass, L. J., W. L. Fisher, and D. J. Turton. 1998. Use of the Index of Biotic Integrity to Assess Water Quality in Forested Streams of the Ouachita Mountains Ecoregion, Arkansas. *Journal of Freshwater Ecology* 13:181–192.
- Hobbs, H. H., Jr. 1979. A new crayfish from the Ouachita River basin in Arkansas (Decapoda: Cambaridae). *Proceedings of the Biological Society of Washington* 92:804–811.
- Hobbs, H. H., Jr. 1981. *The Crayfishes of Georgia*. Smithsonian Contributions to Zoology 318. Smithsonian Institution Press, Washington, D. C.
- Hobbs, H. H., Jr. and H. W. Robison. 1985. A new burrowing crayfish (Decapoda: Cambaridae) from southwestern Arkansas. *Proceedings of the Biological Society of Washington* 98(4):1035-1041.
- Jiménez-Alfaro, B., D. Draper, and D. Nogués-Bravo. 2012. Modeling the potential area of occupancy at fine resolution may reduce uncertainty in species range estimates. *Biological Conservation* 147:190–196.
- Kramer-Schadt, S., J. Niedballa, J. D. Pilgrim, B. Schröder, J. Lindenborn, V. Reinfelder, M. Stillfried, I. Heckmann, A. K. Scharf, D. M. Augeri, S. M. Cheyne, A. J. Hearn, J. Ross, D. W. Macdonald, J. Mathai, J. Eaton, A. J. Marshall, G. Semiadi, R. Rustam, H.

- Bernard, R. Alfred, H. Samejima, J. W. Duckworth, C. Breitenmoser-Wuersten, J. L. Belant, H. Hofer, and A. Wilting. 2013. The importance of correcting for sampling bias in MaxEnt species distribution models. *Diversity and Distributions* 19:1366–1379.
- Lahoz-Monfort, J. J., G. Guillera-Arroita, and B. A. Wintle. 2014. Imperfect detection impacts the performance of species distribution models. *Global Ecology and Biogeography* 23:504–515.
- Larson, E. R., and J. D. Olden. 2010. Latent extinction and invasion risk of crayfishes in the southeastern United States. *Conservation Biology* 24:1099–1110.
- Latif, Q. S., V. A. Saab, K. Mellen-Mclean, and J. G. Dudley. 2015. Evaluating habitat suitability models for nesting white-headed woodpeckers in unburned forest. *The Journal of Wildlife Management* 79:263–273.
- Loughman, Z. J., T. P. Simon, and S. A. Welsh. 2012. Occupancy rates of primary burrowing crayfish in natural and disturbed large river bottomlands. *Journal of Crustacean Biology* 32:557–564.
- Moore, M. J., R. J. DiStefano, and E. R. Larson. 2013. An assessment of life-history studies for USA and Canadian crayfishes: knowledge gaps to improve conservation and management. *Freshwater Science* 32(3): 1276-1287.
- Morehouse, R. L., and M. Tobler. 2013. Crayfishes (Decapoda: Cambaridae) of Oklahoma: identification, distributions, and natural history. *Zootaxa* 3717:101–157.
- Muscarella, R., P. J. Galante, M. Soley-Guardia, R. A. Boria, J. M. Kass, M. Uriarte, and R. P. Anderson. 2014. ENMeval: An R package for conducting spatially independent evaluations and estimating optimal model complexity for Maxent ecological niche models. *Methods in Ecology and Evolution* 5:1198–1205.

- Page, L. 1985. The crayfishes and shrimps (Decapoda) of Illinois. Illinois Natural History Survey Bulletin 33(4):i-339.
- Pearson, R. G., C. J. Raxworthy, M. Nakamura, and A. Townsend Peterson. 2007. Predicting species distributions from small numbers of occurrence records: a test case using cryptic geckos in Madagascar. *Journal of Biogeography* 34:102–117.
- Peterman, W. E., J. A. Crawford, and A. R. Kuhns. 2013. Using species distribution and occupancy modeling to guide survey efforts and assess species status. *Journal for Nature Conservation* 21:114–121.
- Peterson, A. T. 2001. Predicting Species' Geographic Distributions Based on Ecological Niche Modeling. *The Condor* 103(3):599–605.
- Phillips, J. D., and D. A. Marion. 2005. Biomechanical effects, lithological variations, and local pedodiversity in some forest soils of Arkansas. *Geoderma* 124:73–89.
- Phillips, S. J., R. P. Anderson, and R. E. Schapire. 2006. Maximum entropy modeling of species geographic distributions. *Ecological Modelling* 190:231–259.
- Phillips, S. J., and M. Dudík. 2008. Modeling of species distributions with Maxent: new extensions and a comprehensive evaluation. *Ecography* 31:161–175.
- Phillips, S. J. 2008. Transferability, sample selection bias and background data in presence-only modelling: A response to Peterson et al. (2007). *Ecography* 31:272–278.
- R Development Core Team. 2014. R: A Language and Environment for Statistical Computing. R Foundation for Statistical Computing, Vienna, Austria. (<http://www.r-project.org>).
- Raes, N. and H. ter Steege. 2007. A null-model for significance testing of presence-only species distribution models. *Ecography* 30: 727-736.

- Rebelo, H., and G. Jones. 2010. Ground validation of presence-only modelling with rare species: A case study on barbastelles *Barbastella barbastellus* (Chiroptera: Vespertilionidae). *Journal of Applied Ecology* 47:410–420.
- Rhoden, C. M., C. A. Taylor, and W. E. Peterman. 2016. Highway to heaven? Roadsides as preferred habitat for two narrowly endemic crayfish. *Freshwater Science* 35:(in press).
- Ridge, J., T. P. Simon, D. Karns, and J. Robb. 2008. Comparison of Three Burrowing Crayfish Capture Methods Based on Relationships with Species Morphology, Seasonality, and Habitat Quality. *Journal of Crustacean Biology* 28:466–472.
- Rinnhofer, L. J., N. Roura-Pascual, W. Arthofer, T. Dejaco, B. Thaler-Knoflach, G. A. Wachter, E. Christian, F. M. Steiner, and B. C. Schlick-Steiner. 2012. Iterative species distribution modelling and ground validation in endemism research: an Alpine jumping bristletail example. *Biodiversity and Conservation* 21:2845–2863.
- Robin, X., N. Turck, A. Hainard, N. Tiberti, F. Lisacek, J.-C. Sanchez, and M. Müller. 2011. pROC: an open-source package for R and S+ to analyze and compare ROC curves. *BMC bioinformatics* 12:77.
- Robison, H. W., and B. Crump. 2004. Distribution, natural history aspects, and status of the Arkansas endemic crayfish, *Fallicambarus harpi* Hobbs and Robison, 1985. *Journal of the Arkansas Academy of Science* 58:91–94.
- Robison, H. W. 2008. Distribution, life history aspects, and conservation status of three Ouachita Mountain crayfishes: *Procambarus tenuis*, *P. reimeri*, and *Orconectes menae*. U.S.D.A. Forest Service, Ouachita National Forest. Hot Springs, Arkansas.

- Robison, H. W., C. McAllister, C. Carlton, and G. Tucker. 2008. The Arkansas endemic biota: An update with additions and deletions. *Journal of the Arkansas Academy of Science* 62: 84-96.
- Searcy, C. A., and H. B. Shaffer. 2014. Field validation supports novel niche modeling strategies in a cryptic endangered amphibian. *Ecography* 37:983-992.
- Simmons, J. W., and S. J. Fraley. 2010. Distribution, Status, and Life-History Observations of Crayfishes in Western North Carolina. *Southeastern Naturalist* 9:79–126.
- Taylor, C. A., G. A. Schuster, J. E. Cooper, R. J. DiStefano, A. G. Eversole, P. Hamr, H. H. Hobbs III, H. W. Robison, C. E. Skelton, and R. F. Thoma. 2007. A reassessment of the conservation status of crayfishes of the United States and Canada after 10+ years of increased awareness. *Fisheries* 32:372–389.
- Warren, D. L., R. E. Glor, and M. Turelli. 2010. ENMTools: A toolbox for comparative studies of environmental niche models. *Ecography* 33:607–611.
- Warren, D. L., and S. N. Seifert. 2011. Ecological niche modeling in Maxent: the importance of model complexity and the performance of model selection criteria. *Ecological Applications*. 21(2):335-342.
- Welch, S. M., A. G. Eversole, and J. Riley. 2007. Using the spatial information implicit in the habitat specificity of the burrowing crayfish *Distocambarus crockeri* to identify a lost landscape component. *Ecography* 30:349–358.
- Welch, S. M., and A. G. Eversole. 2006. The occurrence of primary burrowing crayfish in terrestrial habitat. *Biological Conservation* 130:458–464.



- Williams, J. N., C. Seo, J. Thorne, J. K. Nelson, S. Erwin, J. M. O'Brien, and M. W. Schwartz. 2009. Using species distribution models to predict new occurrences for rare plants. *Diversity and Distributions* 15:565–576.
- Williams, J. D., M. L. Warren Jr., K. S. Cummings, J. L. Harris, and R. J. Neves. 1993. Conservation status of freshwater mussels of the United States and Canada. *Fisheries* 18(9):6-22.
- Wisz, M. S., R. J. Hijmans, J. Li, A. T. Peterson, C. H. Graham, and A. Guisan. 2008. Effects of sample size on the performance of species distribution models. *Diversity and Distributions* 14:763–773.
- Woods, A. J., T. L. Foti, S. S. Chapman, J. M. Omernik, J. A. Wise, E. O. Murray, W. L. Prior, J. B. J. Pagan, J. A. Comstock, and M. Radford. 2004. Ecoregions of Arkansas (color poster with map, descriptive text, summary tables, and photographs). US Geological Survey map scale 1:1,000,000. US Geological Survey, Reston, Virginia. (Available from: [http://archive.epa.gov/wed/ecoregions/web/html/ar\\_eco.html](http://archive.epa.gov/wed/ecoregions/web/html/ar_eco.html))
- Yackulic, C. B., R. Chandler, E. F. Zipkin, J. A. Royle, J. D. Nichols, E. H. Campbell Grant, and S. Veran. 2013. Presence-only modelling using MAXENT: when can we trust the inferences? *Methods in Ecology and Evolution* 4:236–243.

## CHAPTER 4: HABITAT ASSESSMENT AND RANGE UPDATES FOR TWO RARE ARKANSAS BURROWING CRAYFISHES: *FALLICAMBARUS HARPI* AND *PROCAMBARUS REIMERI*

### INTRODUCTION

North America has the highest diversity of crayfishes worldwide (Taylor et al., 2007). Within North America, 22% of the species listed as endangered or threatened in a recent conservation review (Taylor et al., 2007) were primary burrowing crayfishes. Primary burrowing crayfishes differ from stream-dwelling crayfishes in their life history traits. They spend their complete life cycle underground, leaving their burrows only to forage and search for a burrow of the opposite sex for mating (Hobbs 1981). The Ouachita Highlands Freshwater Ecoregion is the 6<sup>th</sup> most diverse freshwater ecoregion for native crayfishes in the United States and Canada (Moore et al. 2013). Within the Ouachita Highlands Freshwater Ecoregion, the Ouachita Mountains Ecoregion (Woods et al. 2004; OME) of southwestern Arkansas harbors the highest diversity of primary burrowing crayfishes in the state with six species (*Fallicambarus harpi*, *F. jeanae*, *F. strawni*, *Procambarus liberorum*, *P. parasimulans*, and *P. reimeri*).

The narrowly endemic nature of North American crayfishes is well documented (Morehouse and Tobler, 2013; Page, 1985; Simmons and Fraley, 2010; Taylor et al., 2007), and primary burrowing crayfishes in Arkansas are no exception (Robison et al., 2008). The endemic nature of any taxa makes them more vulnerable to localized extirpation. Because these animals occur at such a constrained geographic scale, it is important to accurately describe their habitat preferences and range to ensure the persistence of local populations through the management of suitable habitat and monitoring of existing populations. Two such primary burrowing crayfishes in Arkansas in need of these conservation assessments are *Fallicambarus harpi* (Ouachita Burrowing Crayfish) and *Procambarus reimeri* (Irons Fork Burrowing Crayfish).

Since their formal descriptions, little information has been published regarding the habitat preferences and range assessments of *F. harpi* and *P. reimeri*. Both crayfishes are endemic to the OME in southwestern Arkansas. These species are vulnerable to population declines and are currently recorded under the Endangered (*P. reimeri*) and Vulnerable (*F. harpi*) conservation status categories based on modifications to or reductions in habitat in their already restricted ranges (Taylor et al. 2007). Also, these species were included in a recent petition filed by the privately funded Center for Biological Diversity for protection under the Federal Endangered Species Act. To assess these conservation concerns, we developed a study with the following objectives: 1) to determine the holistic range of both species (*F. harpi* and *P. reimeri*) within the OME of Arkansas and 2) to refine the description of suitable habitat for both *F. harpi* and *P. reimeri*.

### **TARGET SPECIES ACCOUNTS**

*Fallicambarus (Fallicambarus) harpi*- The Ouachita Burrowing Crayfish was described from two locations in Pike County, Arkansas, in 1985 by H.H. Hobbs, Jr. and H.W. Robison (Hobbs and Robison 1985). Robison and Crump (2004) reviewed and updated the status of this endemic crayfish, revealing 12 new populations in Montgomery, Hot Spring, Garland, and Pike counties in Arkansas. Since 2004, no other information has been published relating to the range or habitat requirements of this species. This primary burrowing crayfish is known from wet seepage areas with abundant sedges such as roadside ditches and other right of ways (Robison and Crump 2004). *Fallicambarus harpi* most closely resembles both *F. strawni* and *F. jeanae* but differs by possessing a free, never adnate, cephalic process on the first pleopod of the first form male (Hobbs and Robison 1985).

*Procambarus (Girardiella) reimeri*- The Irons Fork Burrowing Crayfish was described from six locations in Polk County, Arkansas, by H.H. Hobbs, Jr. in 1979 (Hobbs 1979). Robison (2008) most recently reviewed and updated the status of this Arkansas endemic, revealing the species only to occur in Polk County, in the vicinity of Mena, Arkansas. Since 2008, no other information has been published relating to the range or habitat requirements of this species. This primary burrowing crayfish reportedly constructs relatively simple burrows in sandy clay soil in wet seepage areas and roadside ditches (Hobbs 1979, Robison 2008). This species most closely resembles *P. gracilis* and *P. liberorum* but differs from both by possessing a broader areola and lacking tubercles on the annulus ventralis (Hobbs 1979).

## METHODS

Field surveys were conducted in the spring of 2014 and 2015 for these two primary burrowing crayfishes in southwestern Arkansas. We sampled in the spring of both years as this is the time of peak activity for both species, which correlates with the time of highest species detection. In 2014, we sampled historic localities from museum databases. Historical records for both species were queried from the Illinois Natural History Survey Crustacean Collection, National Museum of Natural History Invertebrate Zoology Collection, and Arkansas Department of Natural Heritage. In 2015, we based our sampling sites on species distribution models created from the previous year's capture records. We sampled 13 counties in western Arkansas encompassing the known range of both species of primary burrowing crayfish: Pulaski, Saline, Perry, Garland, Hot Spring, Clark, Yell, Montgomery, Pike, Scott, Howard, Polk, and Sevier (listed from east to west).

In 2014, three to six 50-m transects were positioned at and near the historical museum locality. The first transect at each sampling site was placed where burrows were present,

ensuring the first transect was indeed situated over the historical museum location. After a GPS location and azimuth were taken at the 0-m mark, a 1-m<sup>2</sup> PVC quadrat was placed over the linear transect every 10 m resulting in six 1-m<sup>2</sup> quadrats per 50-m transect. After the initial transect was completed over the historical location, two to five transects were completed in the same way in adjacent habitat at the sampling site. Habitat heterogeneity determined the number of transects sampled at each site. If a site was homogenous, fewer transects were sampled to increase the number of sampling sites to be visited during our sampling window.

In 2015, we sampled a semi-random group of sites based on two species distribution models, one for *F. harpi* and one for *P. reimeri*. These species distribution models were constructed with Maxent (Phillips et al. 2006). Maxent is a presence-only modeling algorithm using a set of known occurrences together with predictor variables such as topographic, climatic, edaphic, biogeographic, and remotely sensed variables (Phillips et al. 2006, Phillips and Dudík 2008). These data are used to predict the relative occurrence rate of a focal species across a predefined landscape (Fithian and Hastie 2013). At each sampling site, one 50-m transect was positioned at a GPS location selected *a priori* from the output of the Maxent model. After a GPS location and azimuth were taken at the 0-m mark, a 1-m<sup>2</sup> PVC quadrat was placed over the linear transect every 10 m resulting in six 1-m<sup>2</sup> quadrats per 50-m transect. In both years, supplemental sampling was conducted in the vicinity (<100 m) of each sampling site to confirm or deny the presence of each species.

The density of individuals per 1-m<sup>2</sup> quadrat was estimated with the following equation:

$$\left[ \frac{\left( \frac{\sum x}{z} \right)}{q} \pm \frac{\left( \frac{\sigma[x]}{\sigma[z]} \right)}{q} \right] \times n = \text{individuals per } m^2$$

Where:

*x = burrows per occupied quadrat of target species within transects occupied by only target species*

*z = average number of burrow openings per excavated burrow of target species*

*q = number of occupied quadrats of only target species*

*n = assumed population of single burrow*

In the case that two individuals were found in several burrows ( $n=3$ ), average quadrat density was calculated for burrow populations of  $n=1$  and  $n=2$ .

In both years (2014 and 2015) all quadrats along each transect were searched thoroughly for the presence of active burrows. A burrow was considered active if it had freshly deposited mud at the entrance or the presence of a chimney and lack of debris or spider webs at entrance (Simon 2004). We collected a suite of habitat variables at each quadrat, these variables were later analyzed using generalized linear mixed-models (version 3.1.1; R Project for Statistical Computing, Vienna, Austria; Bates et al. 2014; package lme4) to determine the fine-scale habitat preferences of both species of crayfish. The response variable in each model was the number of burrows within each 1-m<sup>2</sup> quadrat and was modeled with a Poisson error distribution and log link. We modeled burrow counts separately for each species. To account for potential site effects, we modeled transects nested within sites as a random effect in each model. We compared candidate models with Akaike's Information Criterion corrected for small sample sizes (AICc; Akaike 1974). A subset of active burrows were hand excavated at each sampling site and along each transect to ensure any burrow counted at a sampling site harbored the target species. Hand excavation consists of using a hand shovel to dig slowly around the burrow entrance and following the main burrow tunnel, feeling for the crayfish as one works their way through the burrow complex. This method was chosen over other methods due to the success rate and limited amount of time spent at each burrow location (Ridge et al. 2008). Voucher specimens of each

target species were collected and preserved in 70% ethanol from all sites with burrows present and deposited in the Illinois Natural History Survey Crustacean Collection.

## RESULTS

The field surveys from 2014 and 2015 resulted in the sampling of 690 quadrats across 91 sites for *F. harpi* and 702 quadrats across 89 sites for *P. reimeri* (**Fig. 4.1; Appendix C, D; Table C.1, D.1**) in western Arkansas. All of the historic localities sampled were near (<50 m) primary, secondary, and tertiary roadways. In 2014, we sampled adjacent habitat near (<100 m) the historic sites, out of the right of way in an attempt to survey different habitat types spatially available to individuals at each site. In 2015, all of the sites sampled were in the right of way of primary, secondary, and tertiary roadways. Based on these field surveys, *F. harpi* was found to be present in 79 quadrats across 15 sites, and *P. reimeri* was found to be present in 90 quadrats across 20 sites. During the field sampling we encountered 14 other species of crayfish (*Cambarus ludovicianus*, *F. fodiens*, *F. jeanae*, *F. jeanae x F. strawni*, *F. strawni*, *P. (Girardiella) sp.*, *P. acutus*, *P. curdi*, *P. liberorum*, *P. parasimulans*, *P. regalis*, *P. simulans*, *P. tenuis*, and *P. tulaneii*; **Appendix B; Table B.1**). Voucher specimens of these species were deposited in the Illinois Natural History Survey Crustacean Collection.

### *Fallicambarus harpi*

Of the 91 sites sampled for *F. harpi*, the species was found at all historical sites ( $n = 11$ ) and 5% of sites sampled in 2015 ( $n = 5$ ) (**Fig. 4.2**). We counted 214 active burrows in both years. The modeling analysis revealed the number of burrows in a quadrat was negatively associated with canopy cover, herbaceous ground cover, and percent clay composition of the soil. The presence of hydrophilic sedges and amount of solar radiation was positively associated with the

number of burrows in a quadrat. Burrows were generally present in quadrats with little to no canopy cover ( $n = 79$ ,  $\mu = 4.8\%$ ,  $\sigma = 18.7$ ). Sedges were present in 76% of the quadrats with burrows present ( $n = 60$ ) and present in 40% of quadrats where burrows were absent ( $n = 247$ ). Assuming a burrow population of one individual, the density of individuals per 1-m<sup>2</sup> quadrat harboring burrows of only *F. harpi* was 1.82 ( $\pm 0.06$ ) individuals per m<sup>2</sup> of occupied quadrat. Assuming a burrow population of two individuals the density of individuals per 1-m<sup>2</sup> quadrat harboring burrows of only *F. harpi* was 3.64 ( $\pm 0.12$ ) individuals per m<sup>2</sup> of occupied quadrat. *Fallicambarus harpi* was captured in one transect with *P. parasimulans* present and one transect with *P. simulans*.

### ***Procambarus reimeri***

Of the 89 sites sampled for *P. reimeri*, the species was found at all but one historical site sampled ( $n = 8$ ) and 14% of the sites sampled in 2015 ( $n = 16$ ) (**Fig. 4.2**). We counted 140 active burrows in both years. The modeling analysis revealed the number of burrows in a quadrat was negatively associated with canopy cover. The presence of hydrophilic sedges and amount of solar radiation was positively associated with the number of burrows in a quadrat. Burrows were generally present in quadrats with little to no canopy cover ( $n = 90$ ,  $\mu = 4.1\%$ ,  $\sigma = 12.8$ ). Sedges were present in 94% of the quadrats with burrows present ( $n = 85$ ) and present in 44% of quadrats where burrows were absent ( $n = 269$ ). Assuming a burrow population of one individual the density of individuals per 1-m<sup>2</sup> quadrat harboring burrows of only *P. reimeri* was 0.93 ( $\pm 0.01$ ) individuals per m<sup>2</sup> of occupied quadrat. Assuming a burrow population of two individuals the density of individuals per 1-m<sup>2</sup> quadrat harboring burrows of only *P. reimeri* was 1.86 ( $\pm 0.02$ ) individuals per m<sup>2</sup> of occupied quadrat. *Procambarus reimeri* was captured in one transect where *P. tenuis* was present.



## DISCUSSION

Our study assessed the range and habitat of two primary burrowing crayfish species in southwestern Arkansas. We recorded *F. harpi* at all of the historic sites sampled and *P. reimeri* at all but one historic site. Although we did not visit all historical locations, historic sites sampled encompassed the (then) known range of both species. Our sampling scheme resulted in most (91% and 93% for *F. harpi* and *P. reimeri*) of the sampling sites to be near or in the right of way of primary, secondary, and tertiary roadways. Although most of the sampling was conducted in these highly altered habitats, our field surveys revealed new populations of both species. Both species of primary burrowing crayfish showed common patterns of habitat preference, which correspond with early accounts of both species preferred habitat (Hobbs 1979, Hobbs and Robison 1985). Based on this study, we recommend *F. harpi* retain its conservation status category of Vulnerable and *P. reimeri* be downgraded to Vulnerable based on Taylor et al. 2007.

The range of *F. harpi* was expanded marginally by approximately 91 km<sup>2</sup> with five new populations, including one found in a county (Clark) not previously documented in its range (**Fig. 4.2**). The range of *P. reimeri* was expanded by a larger margin, approximately 1404 km<sup>2</sup>, including 16 new populations. Once again, one of these populations was discovered in a county (Montgomery) previously not known in its range (**Fig. 4.2**). The range of both species continues to be relatively small compared to most of the other primary burrowing crayfishes in the OME (e.g. *F. jeanae*, *F. strawni*, *P. liberorum*, and *P. parasimulans*). We are confident the ranges of *F. harpi* and *P. reimeri* are now accurately delineated in Arkansas. *P. reimeri* was captured near (<1 km) the state line of Oklahoma in Arkansas (**Fig. 4.2**), leading to the conclusion *P. reimeri* may occur in Oklahoma. We recommend more field surveys to assess this possibility.

Both *F. harpi* and *P. reimeri* showed common patterns of habitat use. The habitat we found animals to be most abundant in was composed of treeless, wet seepage areas with an abundance of low grasses and sedges. The soil composition at these occupied sites was primarily loam and silt loam (Soil Survey Division Staff 1993), present in 92% of *F. harpi* quadrats and 94% of *P. reimeri* quadrats. The burrows of *F. harpi* and *P. reimeri* excavated in the field were complex, 0.5 to 1 meter in depth, and connected to groundwater. Our results confirm the specific importance of these wet, open canopy habitats as a preferred environment for both species.

The success in finding *F. harpi* at all of the historical sites sampled and five new populations indicates this crayfish is geographically constrained but relatively stable. Its total range is estimated to be 265 km<sup>2</sup> using a minimum convex polygon encompassing all known populations. The area within this range deemed as suitable habitat is estimated as 109 km<sup>2</sup>. This area was calculated by summing the area predicted above the lowest relative occurrence rate associated with any one of the presence localities from 2014 and 2015 from the Maxent analysis. These results suggest this crayfish continue to be categorized as Vulnerable due to its restricted range in accordance with Taylor et al. 2007. The success of finding *P. reimeri* at all but one historical site and 16 new populations, one of which was greater than 50 km away from the previously known range, indicates this crayfish is somewhat geographically constrained but is more widespread than originally thought. Its total range is estimated to be 1467 km<sup>2</sup> using a minimum convex polygon encompassing all known populations. The area within this range deemed as suitable habitat is estimated as 178 km<sup>2</sup>. This area was calculated by summing the area predicted above the lowest relative occurrence rate associated with any one of the presence localities from 2014 and 2015 from the Maxent analysis. These results suggest *P. reimeri* should be categorized as Vulnerable as opposed to Endangered as dictated by Taylor et al. 2007.

## TABLES AND FIGURES

**Figure 4.1: Sampling locations for two species of primary burrowing crayfish, *Fallicambarus harpi* (top) and *Procambarus reimeri* (bottom), in western Arkansas in the spring of 2014 and 2015. Some triangles and squares represent more than one quadrat.**

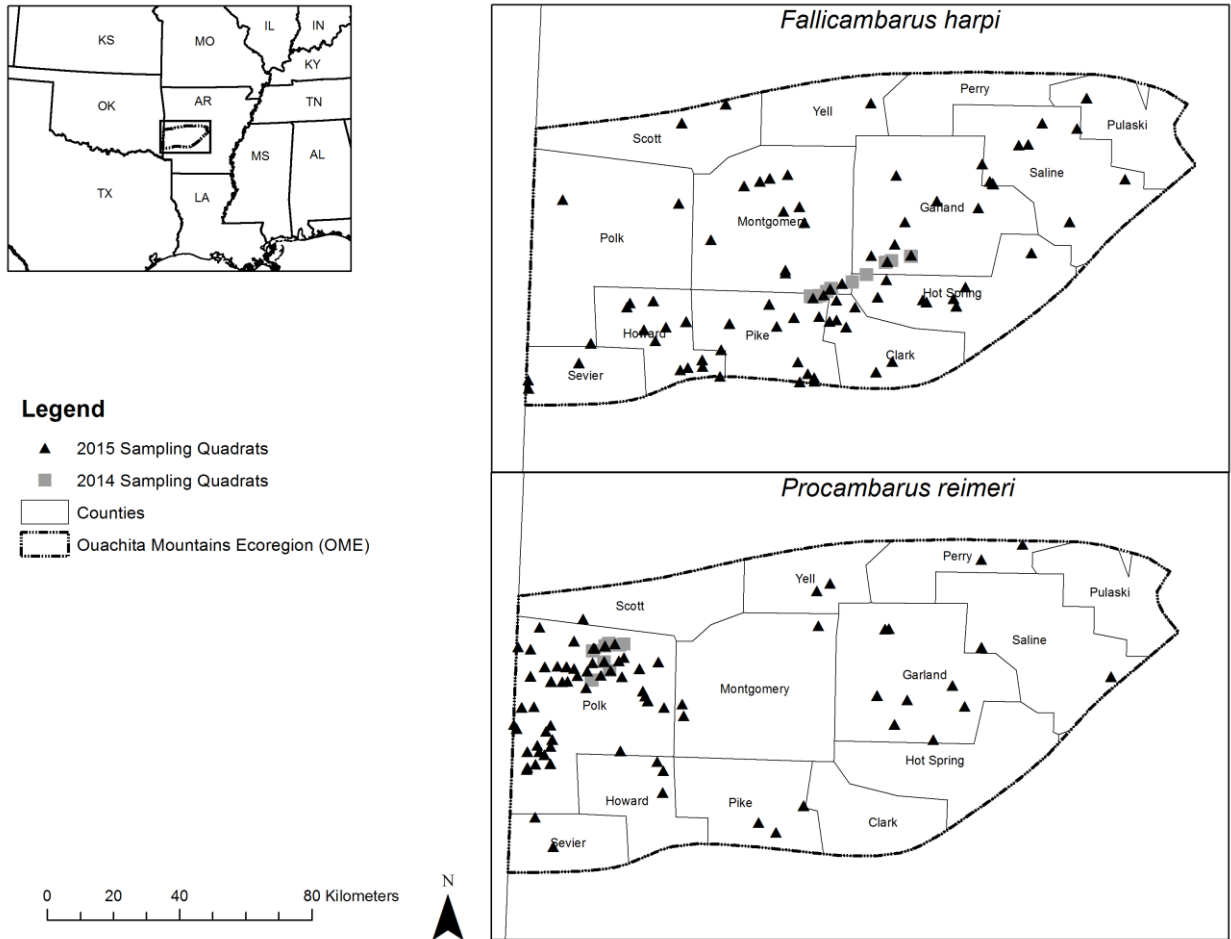

**Figure 4.2: Historical and current capture locations of *Fallicambarus harpi* (right) and *Procambarus reimeri* (left) in southwestern Arkansas. Some triangles and squares represent more than one presence location.**

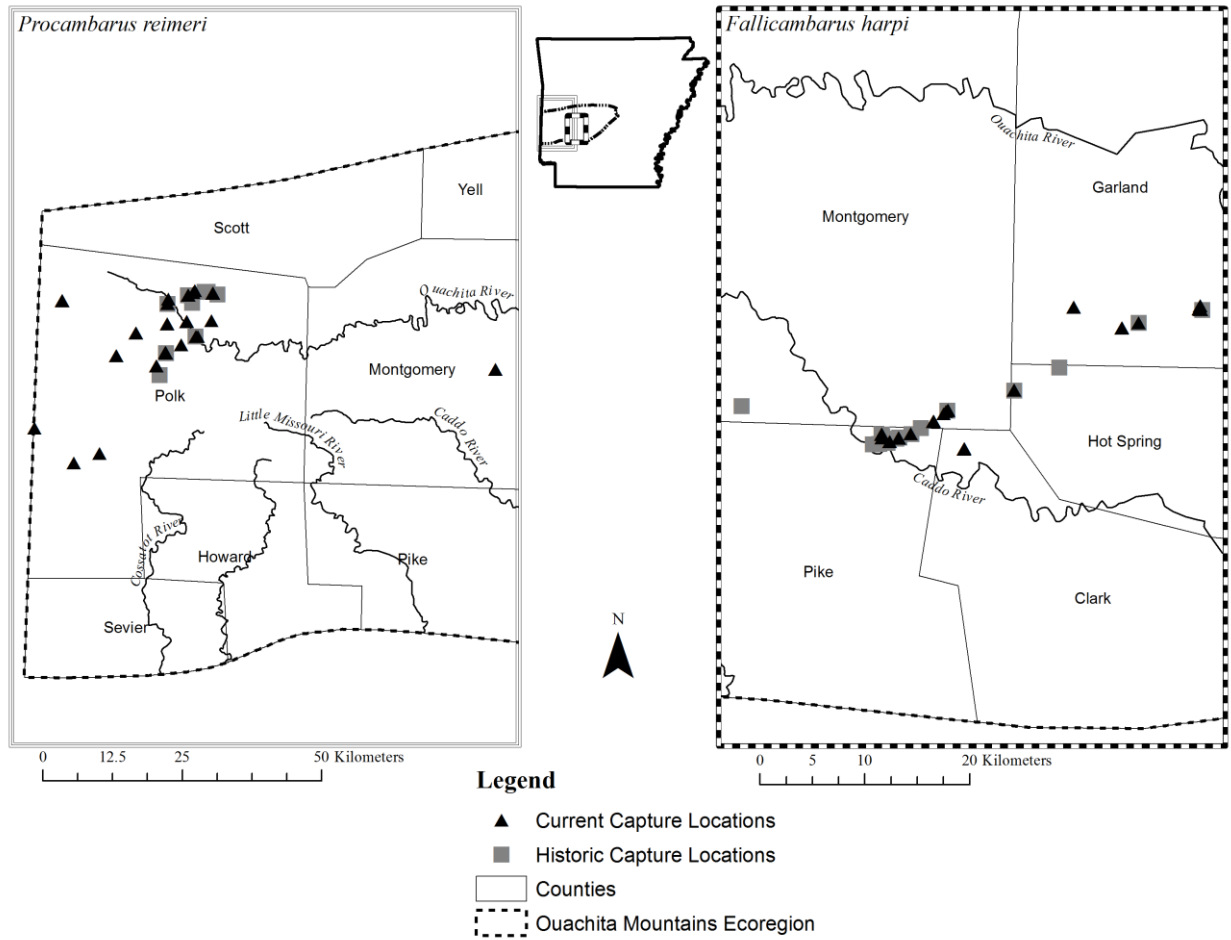

**Table 4.1: Capture information for *Fallicambarus harpi* in the spring of 2014 and 2015 in south-western Arkansas.**

| Date      | Drainage       | County     | Latitude | Longitude | Form I | Form II | Female | Total |
|-----------|----------------|------------|----------|-----------|--------|---------|--------|-------|
| 4/8/2014  | Ouachita River | Garland    | 34.44381 | -93.21650 | 3      | 0       | 3      | 6     |
| 4/8/2014  | Ouachita River | Garland    | 34.44020 | -93.21207 | 0      | 0       | 4      | 4     |
| 4/8/2014  | Ouachita River | Garland    | 34.44383 | -93.21063 |        | 1       |        | 1     |
| 4/8/2014  | Ouachita River | Garland    | 34.43239 | -93.27458 | 1      | 0       | 1      | 2     |
| 4/8/2014  | Ouachita River | Garland    | 34.43238 | -93.27550 | 1      | 1       | 1      | 3     |
| 4/8/2014  | Ouachita River | Garland    | 34.42776 | -93.29308 |        | 1       | 1      | 2     |
| 4/9/2014  | Ouachita River | Garland    | 34.42746 | -93.29530 | 1      | 2       |        | 3     |
| 4/9/2014  | Ouachita River | Hot Spring | 34.39401 | -93.35677 |        | 1       |        | 1     |
| 4/9/2014  | Ouachita River | Hot Spring | 34.39405 | -93.35772 |        |         | 1      | 1     |
| 4/9/2014  | Caddo River    | Pike       | 34.33596 | -93.51162 |        | 1       |        | 1     |
| 4/9/2014  | Caddo River    | Pike       | 34.33606 | -93.51176 |        |         | 1      | 1     |
| 4/9/2014  | Caddo River    | Pike       | 34.33268 | -93.52367 | 1      | 1       | 2      | 4     |
| 4/9/2014  | Caddo River    | Pike       | 34.33539 | -93.54180 | 1      |         | 2      | 3     |
| 4/10/2014 | Caddo River    | Montgomery | 34.34728 | -93.48791 | 2      | 1       | 0      | 3     |
| 4/10/2014 | Caddo River    | Montgomery | 34.35593 | -93.47363 | 1      | 1       |        | 2     |
| 4/10/2014 | Caddo River    | Montgomery | 34.35617 | -93.47311 |        |         | 1      | 1     |
| 4/10/2014 | Caddo River    | Montgomery | 34.35578 | -93.47449 | 1      |         | 1      | 2     |
| 4/10/2014 | Ouachita River | Hot Spring | 34.37383 | -93.40457 | 1      | 1       |        | 2     |
| 3/28/2015 | Ouachita River | Pike       | 34.32927 | -93.53305 |        |         | 4      | 4     |
| 3/28/2015 | Ouachita River | Garland    | 34.44567 | -93.34285 |        | 1       |        | 1     |
| 3/29/2015 | Ouachita River | Clark      | 34.32352 | -93.45580 | 2      |         | 2      | 4     |
| 3/28/2015 | Ouachita River | Montgomery | 34.35361 | -93.47739 | 1      |         |        | 1     |
| 3/26/2015 | Ouachita River | Garland    | 34.44689 | -93.21102 | 1      |         | 2      | 3     |

**Table 4.2: Capture information for *Procambarus reimeri* in the spring of 2014 and 2015 in south-western Arkansas.**

| Date      | Drainage       | County     | Latitude | Longitude | Form I | Form II | Female | Total |
|-----------|----------------|------------|----------|-----------|--------|---------|--------|-------|
| 4/21/2012 | Ouachita River | Polk       | 34.58384 | -94.14814 |        |         | 2      | 2     |
| 4/21/2012 | Ouachita River | Polk       | 34.58403 | -94.14822 | 1      |         | 1      | 2     |
| 4/21/2012 | Ouachita River | Polk       | 34.60709 | -94.16787 |        |         | 1      | 1     |
| 4/22/2014 | Ouachita River | Polk       | 34.65405 | -94.11627 | 1      |         |        | 1     |
| 4/22/2014 | Ouachita River | Polk       | 34.65777 | -94.15186 |        | 1       |        | 1     |
| 4/22/2014 | Ouachita River | Polk       | 34.65734 | -94.15216 |        |         | 1      | 1     |
| 4/22/2014 | Ouachita River | Polk       | 34.65041 | -94.16422 |        |         | 1      | 1     |
| 4/23/2014 | Ouachita River | Polk       | 34.63678 | -94.20505 | 1      |         | 3      | 4     |
| 4/23/2014 | Ouachita River | Polk       | 34.55721 | -94.20782 | 1      |         |        | 1     |
| 4/23/2014 | Ouachita River | Polk       | 34.55682 | -94.20712 |        |         | 4      | 4     |
| 4/23/2014 | Ouachita River | Polk       | 34.65411 | -94.11646 | 2      |         |        | 2     |
| 4/23/2014 | Ouachita River | Polk       | 34.65422 | -94.15506 |        |         | 2      | 2     |
| 3/31/2015 | Ouachita River | Montgomery | 34.53489 | -93.56304 | 1      |         | 1      | 2     |
| 4/14/2015 | Ouachita River | Polk       | 34.65025 | -94.16466 | 1      |         |        | 1     |
| 4/11/2015 | Ouachita River | Polk       | 34.53557 | -94.22560 |        | 1       |        | 1     |
| 4/15/2015 | Ouachita River | Polk       | 34.60364 | -94.20482 |        | 1       | 1      | 2     |
| 4/18/2015 | Red River      | Polk       | 34.43276 | -94.46193 |        |         | 3      | 3     |
| 4/18/2015 | Red River      | Polk       | 34.37649 | -94.38387 | 1      | 1       | 1      | 3     |
| 4/11/2015 | Red River      | Polk       | 34.58804 | -94.26631 |        | 1       | 6      | 7     |
| 4/10/2015 | Red River      | Polk       | 34.63903 | -94.41092 | 1      |         | 3      | 4     |
| 4/18/2015 | Red River      | Polk       | 34.39311 | -94.33360 | 2      |         |        | 2     |
| 4/15/2015 | Ouachita River | Polk       | 34.60993 | -94.11894 | 1      |         |        | 1     |
| 4/9/2015  | Red River      | Polk       | 34.55400 | -94.30660 | 1      |         | 1      | 2     |
| 4/15/2015 | Ouachita River | Polk       | 34.58384 | -94.14469 |        |         | 1      | 1     |
| 4/15/2015 | Ouachita River | Polk       | 34.57040 | -94.17729 | 2      |         |        | 2     |
| 4/14/2015 | Ouachita River | Polk       | 34.64380 | -94.20291 | 1      |         | 1      | 2     |
| 4/14/2015 | Ouachita River | Polk       | 34.65010 | -94.16549 | 1      |         |        | 1     |

## LITERATURE CITED

- Bates, D., M. Maechler, B. Bolker, and S. Walker. 2014. lme4: linear mixed-effects models using 'Eigen' and S4. R Project for Statistical Computing, Vienna, Austria. (Available from: <http://cran.r-project.org/package=lme4>)
- Fithian, W., and T. Hastie. 2013. Finite-sample equivalence in statistical models for presence-absence only data. *Annals of Applied Statistics* 7:1917–1939.
- Hobbs, H.H., Jr. and H.W. Robison. 1985. A new burrowing crayfish (Decapoda: Cambaridae) from southwestern Arkansas. *Proceedings of the Biological Society of Washington* 98(4):1035-1041.
- Hobbs, H. H., Jr. 1979. A new crayfish from the Ouachita River basin in Arkansas (Decapoda: Cambaridae). *Proceedings of the Biological Society of Washington* 92(4):804–811.
- Hobbs, H. H., Jr. 1981. *The Crayfishes of Georgia*. Smithsonian Contributions to Zoology. Smithsonian Contributions to Zoology, City of Washington.
- Moore, M. J., R. J. DiStefano, and E. R. Larson. 2013. An assessment of life-history studies for USA and Canadian crayfishes: identifying biases and knowledge gaps to improve conservation and management. *Freshwater Science* 32(4):1276–1287.
- Morehouse, R. L., and M. Tobler. 2013. Crayfishes (Decapoda: Cambaridae) of Oklahoma: identification, distributions, and natural history. *Zootaxa* 3717(2):101–157.
- Page, L. 1985. The crayfishes and shrimps (Decapoda) of Illinois. *Illinois Natural History Survey Bulletin*. 33(4):i-339.
- Phillips, S. J., R. P. Anderson, and R. E. Schapire. 2006. Maximum entropy modeling of species geographic distributions. *Ecological Modelling* 190:231–259.
- Phillips, S. J., and M. Dudík. 2008. Modeling of species distributions with Maxent: new extensions and a comprehensive evaluation. *Ecography* 31:161–175.

- Ridge, J., T. P. Simon, D. Karns, and J. Robb. 2008. Comparison of Three Burrowing Crayfish Capture Methods Based on Relationships with Species Morphology, Seasonality, and Habitat Quality. *Journal of Crustacean Biology* 28(3):466–472.
- Robison, H. W., and B. Crump. 2004. Distribution, natural history aspects, and status of the Arkansas endemic crayfish, *Fallicambarus harpi* Hobbs and Robison, 1985. *Journal of the Arkansas Academy of Science* 58:91–94.
- Robison, H. W., C. McAllister, C. Carlton, and G. Tucker. 2008. The Arkansas endemic biota: An update with additions and deletions. *Journal of the Arkansas Academy of Science* 62:84-96.
- Robison, H. W. 2008. Distribution, life history aspects, and conservation status of three Ouachita Mountain crayfishes: *Procambarus tenuis*, *P. reimeri*, and *Orconectes menae*. U.S.D.A. Forest Service, Ouachita National Forest. Hot Springs, Arkansas.
- Simmons, J. W., and S. J. Fraley. 2010. Distribution, Status, and Life-History Observations of Crayfishes in Western North Carolina. *Southeastern Naturalist* 9(3):79–126.
- Simon, T. P. 2004. Standard operating procedures for the collection and study of burrowing crayfish in Indiana. I. Methods for the collection of burrowing crayfish in streams and terrestrial habitats. Miscellaneous Papers of the Indiana Biological Survey Aquatic Research Center Number 2.
- Soil Survey Division Staff. 1993. Soil survey manual. Handbook 1. Soil Conservation Service, US Department of Agriculture, Washington, DC. (Available from: [http://www.nrcs.usda.gov/Internet/FSE\\_DOCUMENTS/nrcs142p2\\_050993.pdf](http://www.nrcs.usda.gov/Internet/FSE_DOCUMENTS/nrcs142p2_050993.pdf))
- Taylor, C. A., G. A. Schuster, J. E. Cooper, R. J. DiStefano, A. G. Eversole, P. Hamr, H. H. Hobbs III, H. W. Robison, C. E. Skelton, and R. F. Thoma. 2007. A reassessment of the



conservation status of crayfishes of the United States and Canada after 10+ years of increased awareness. *Fisheries* 32:372–389.

Woods, A. J., T. L. Foti, S. S. Chapman, J. M. Omernik, J. A. Wise, E. O. Murray, W. L. Prior, J. B. J. Pagan, J. A. Comstock, and M. Radford. 2004. Ecoregions of Arkansas (color poster with map, descriptive text, summary tables, and photographs). US Geological Survey map scale 1:1,000,000. U.S. Geological Survey, Reston, Virginia.

## SUMMARY

Rare species are important to ecosystem function and are frequently the target of conservation priorities. The very nature of rare species makes them difficult to study comprehensively. A group of rare understudied species are North American primary burrowing crayfishes, which reach their highest diversity in the southeastern United States. Within the southeast, primary burrowing crayfishes reach high diversity in the Ouachita Mountains Ecoregion of Arkansas. Two species of primary burrowing crayfish, *Fallicambarus harpi*, and *Procambarus reimeri*, endemic to this ecoregion had a large knowledge gap in basic natural history. To address this knowledge gap, my research assessed the habitat preferences, distribution, and conservation statuses of both crayfishes.

My study of the habitat preferences *F. harpi* and *P. reimeri* revealed both to be habitat specialists, keying in on the open canopy, wet microhabitats. These habitats were similar to or within roadside ditches, and field observations showed the animals largely did not occur in the adjacent habitat. I conclude that these results support the benefit of the right of ways (ROWs) to the persistence of these narrowly endemic habitat specialists. My study on the ability of species distribution models to predict suitable habitat outside of the historically known range of both species revealed Maxent to be a suitable tool for this endeavor. The results of my study revealed new populations of both species, expanding the range of *F. harpi* marginally (<100 km<sup>2</sup>) and the range of *P. reimeri* by a larger margin (>1000 km<sup>2</sup>), both into counties from which they were not previously known. The conservation status of both crayfishes can be assessed with my data, and it revealed that while both *F. harpi* and *P. reimeri* are geographically constrained, they are locally stable in many roadside ditches. I conclude that the roadside ditch is functioning as

suitable and preferred habitat within a matrix of unsuitable habitat for these two species within the Ouachita Mountains Ecoregion.

## APPENDIX A: CRAYFISH SAMPLING SUPPLEMENTARY MATERIAL

**Table A.1: General statistics of habitat covariates and counts measured at each quadrat sampled for two crayfish species (*Fallicambarus harpi* and *Procambarus reimeri*) in western Arkansas in the spring of 2014 and 2015. See Table 2.1 in main body of thesis for a description of each variable.**

| 2014 General Statistics                 |     |       |            |            |             |          |             |              |              |          |            |            |           |
|-----------------------------------------|-----|-------|------------|------------|-------------|----------|-------------|--------------|--------------|----------|------------|------------|-----------|
|                                         | n   | Sedge | Canopy     | Herb       | Stem        | Burrow   | Elevation   | Solar        | Water_dist   | CTI      | Sand       | Silt       | Clay      |
| <i>Fallicambarus harpi</i> average(std) |     |       |            |            |             |          |             |              |              |          |            |            |           |
| All quadrats                            | 210 | 126   | 25.8(39.9) | 67.2(35.2) | 17.9(15.7)  | 0.7(1.4) | 186.1(12.7) | 6213(15.9)   | 142.1(100.4) | 8.4(1.6) | 36(8.2)    | 49.2(6.3)  | 14.8(5.3) |
| Quadrats with burrows present           | 58  | 43    | 6.6(21.8)  | 82(22.9)   | 23.5(16.81) | 2.5(1.7) | 183.4(10.4) | 6215.9(8.3)  | 159.2(81.6)  | 8.5(1.6) | 33.3(8.6)  | 40.6(6.5)  | 16.1(6.7) |
| Quadrats with burrows absent            | 152 | 83    | 33.2(42.9) | 61.6(37.5) | 15.7(14.9)  | 0(0)     | 187.1(13.4) | 6211.3(17.8) | 135.6(106.5) | 8.3(1.7) | 37.0(7.9)  | 48.6(6.2)  | 16.1(6.7) |
| Quadrats in ROW                         | 150 | 98    | 5.6(16.4)  | 80.9(24.4) | 22.7(15.4)  | 0.9(1.6) | 184.9(12.3) | 6211.6(17.5) | 162.8(109.0) | 8.4(1.5) | 35.6(8.0)  | 49.1(5.8)  | 15.3(5.7) |
| Quadrats scored as adjacent             | 60  | 28    | 76.5(36.3) | 33.1(34.8) | 5.7(8.4)    | 0.1(0.3) | 189.0(13.3) | 6214.9(10.5) | 90.3(42.7)   | 8.2(1.8) | 36.8(8.7)  | 49.5(7.5)  | 13.6(3.9) |
| <i>Procambarus reimeri</i> average(std) |     |       |            |            |             |          |             |              |              |          |            |            |           |
| All quadrats                            | 222 | 142   | 22.5(37.2) | 71.4(36.1) | 31(21.4)    | 0.3(0.7) | 325.6(17.0) | 6089(10.7)   | 93.9(48.6)   | 8.9(1.6) | 29.6(8.6)  | 50.6(7.4)  | 19.8(5.5) |
| Quadrats with burrows present           | 52  | 48    | 2.3(12.0)  | 83.9(22.3) | 37.0(18.2)  | 1.4(0.7) | 326.6(15.8) | 6087.5(9.7)  | 105.4(54.9)  | 8.7(1.6) | 28.2(9.4)  | 50.8(7.9)  | 20.9(4.6) |
| Quadrats with burrows absent            | 170 | 94    | 28.7(40.1) | 67.5(38.7) | 29.2(22.0)  | 0(0)     | 325.3(14.4) | 6089.1(11.0) | 90.3(46.3)   | 9.0(1.6) | 30.0(8.4)  | 50.5(7.24) | 19.5(5.8) |
| Quadrats in ROW                         | 174 | 121   | 6.6(20.4)  | 84.6(23.1) | 38.2(18.1)  | 0.4(0.7) | 323.9(16.8) | 6087.0(10.2) | 95.9(53.8)   | 9.0(1.6) | 28.8(8.9)  | 50.7(7.6)  | 20.5(5.5) |
| Quadrats scored as adjacent             | 48  | 21    | 80.4(24.7) | 22.4(31.9) | 4.9(7.6)    | 0(0)     | 331.8(16.3) | 6095.2(9.9)  | 86.5(19.4)   | 8.8(1.5) | 32.3(7.2)  | 50.3(6.7)  | 17.4(4.9) |
| 2015 General Statistics                 |     |       |            |            |             |          |             |              |              |          |            |            |           |
|                                         | n   | Sedge | Canopy     | Herb       | Stem        | Burrow   | Elevation   | Solar        | Water_dist   | CTI      | Sand       | Silt       | Clay      |
| <i>Fallicambarus harpi</i> average(std) |     |       |            |            |             |          |             |              |              |          |            |            |           |
| All quadrats                            | 480 | 220   | 21(28.5)   | 66.5(31.6) | 24.7(30.9)  | 0.1(1)   | 190.7(38.3) | 5997.4(41.7) | 191.3(122.7) | 8.4(1.8) | 32(12.3)   | 56.3(10)   | 11.7(4.3) |
| Quadrats with burrows present           | 21  | 17    | 0(0)       | 63(24.5)   | 23.7(11.6)  | 3.3(3.5) | 182.8(11.8) | 6000.7(6)    | 219.6(82.9)  | 8.8(1.9) | 36.4(6.3)  | 51.9(2.5)  | 11.6(4.8) |
| Quadrats with burrows absent            | 459 | 203   | 22(28.8)   | 66.6(31.9) | 24.7(21.2)  | 0(0)     | 191.1(39.0) | 5997.3(42.6) | 190(124)     | 8.4(1.8) | 31.8(12.5) | 56.5(10.1) | 11.7(4.3) |
| <i>Procambarus reimeri</i> average(std) |     |       |            |            |             |          |             |              |              |          |            |            |           |
| All quadrats                            | 480 | 214   | 22.4(30.6) | 71.8(28.4) | 22.8(19.9)  | 0.1(0.6) | 294.6(69.1) | 6063.3(48.2) | 186.6(155.1) | 8.1(1.4) | 30.2(10.2) | 57.7(8.2)  | 12.1(3.1) |
| Quadrats with burrows present           | 38  | 37    | 6.6(13.5)  | 71.1(15.2) | 29.3(16.9)  | 1.8(1)   | 325.2(18.5) | 6089(15.6)   | 187.1(102.5) | 8.7(1.2) | 30.2(8.3)  | 57.6(6.7)  | 12.2(2.1) |
| Quadrats with burrows absent            | 442 | 177   | 23.8(31.3) | 71.9(29.2) | 22.2(20)    | 0(0)     | 292(71.2)   | 6061.1(49.4) | 186.5(158.8) | 8.1(1.4) | 30.2(10.3) | 57.7(8.3)  | 12.1(3.2) |

**Table A.1 cont'd**

| 2014 and 2015 General Statistics |     |       |              |            |            |          |             |               |              |          |            |           |           |
|----------------------------------|-----|-------|--------------|------------|------------|----------|-------------|---------------|--------------|----------|------------|-----------|-----------|
|                                  | n   | Sedge | Canopy       | Herb       | Stem       | Burrow   | Elevation   | Solar         | Water_dist   | CTI      | Sand       | Silt      | Clay      |
| <i>Fallicambarus harpi</i>       |     |       |              |            |            |          |             |               |              |          |            |           |           |
|                                  |     |       | average(std) |            |            |          |             |               |              |          |            |           |           |
| All quadrats                     | 690 | 346   | 22.5(32.5)   | 66.6(32.4) | 22.7(19.7) | 0.5(1.4) | 189.3(32.8) | 6062.9(105.3) | 176.3(118.5) | 8.4(1.7) | 33.2(11.4) | 54.1(9.6) | 12.6(4.8) |
| Quadrats with burrows present    | 79  | 60    | 4.8(18.7)    | 77.0(24.7) | 23.5(15.5) | 2.6(2.1) | 183.2(10.7) | 6158.7(95.3)  | 175.3(85.7)  | 8.6(1.6) | 34.1(8.1)  | 50.9(5.7) | 14.9(6.5) |
| Quadrats with burrows absent     | 611 | 286   | 24.7(33.2)   | 65.2(33.0) | 22.6(20.2) | 0        | 190.1(34.5) | 6050.5(100.0) | 176.4(122.1) | 4(1.7)   | 33.1(11.7) | 54.5(9.9) | 12.3(4.5) |
| <i>Procambarus reimeri</i>       |     |       |              |            |            |          |             |               |              |          |            |           |           |
|                                  |     |       | average(std) |            |            |          |             |               |              |          |            |           |           |
| All quadrats                     | 702 | 356   | 22.5(32.8)   | 71.7(31.0) | 25.4(20.7) | 0.2(0.6) | 304.4(59.7) | 6071.3(42.0)  | 157.2(138.0) | 8.4(1.5) | 30.0(9.7)  | 55.5(8.6) | 14.6(5.4) |
| Quadrats with burrows present    | 90  | 85    | 4.1(12.8)    | 78.5(20.4) | 33.7(18.0) | 1.6(0.9) | 326.0(16.9) | 6088.1(12.5)  | 139.9(88.2)  | 8.7(1.4) | 29.1(9.0)  | 53.7(8.1) | 17.3(5.7) |
| Quadrats with burrows absent     | 612 | 271   | 25.2(34.0)   | 70.7(32.2) | 24.2(20.8) | 0        | 301.3(63.0) | 6068.9(44.2)  | 159.8(143.8) | 8.3(1.5) | 30.1(9.8)  | 55.7(8.7) | 14.2(5.2) |

## APPENDIX B: CRAYFISH CAPTURE SUPPLEMENTARY MATERIAL

**Table B.1: Capture information for all crayfishes captured during the spring of 2014 and 2015 in western Arkansas during a study to assess the habitat preferences of two primary burrowing crayfish species (*Fallicambarus harpi* and *Procambarus reimeri*). “# of openings” refers to the number of burrow openings counted during the excavation of each captured individual.**

| Transect # | Date      | Latitude | Longitude | Species                    | Form I | Form II | Female | County     | # of openings |
|------------|-----------|----------|-----------|----------------------------|--------|---------|--------|------------|---------------|
| 1          | 8-Apr-14  | 34.44381 | -93.2165  | <i>Fallicambarus harpi</i> | 1      |         | 1      | Garland    | 1             |
| 1          | 8-Apr-14  | 34.44381 | -93.2165  | <i>Fallicambarus harpi</i> | 2      |         | 2      | Garland    | 2             |
| 2          | 8-Apr-14  | 34.4402  | -93.21207 | <i>Fallicambarus harpi</i> |        |         | 2      | Garland    | 1             |
| 2          | 8-Apr-14  | 34.4402  | -93.21207 | <i>Fallicambarus harpi</i> |        |         | 2      | Garland    | 2             |
| 3          | 8-Apr-14  | 34.44383 | -93.21063 | <i>Fallicambarus harpi</i> |        | 1       |        | Garland    | 1             |
| 4          | 8-Apr-14  | 34.43239 | -93.27458 | <i>Fallicambarus harpi</i> |        |         | 1      | Garland    | 2             |
| 4          | 8-Apr-14  | 34.43239 | -93.27458 | <i>Fallicambarus harpi</i> | 1      |         |        | Garland    | 1             |
| 6          | 8-Apr-14  | 34.43238 | -93.2755  | <i>Fallicambarus harpi</i> | 1      |         | 1      | Garland    | 1             |
| 6          | 8-Apr-14  | 34.43238 | -93.2755  | <i>Fallicambarus harpi</i> |        | 1       |        | Garland    | 2             |
| 8          | 8-Apr-14  | 34.42776 | -93.29308 | <i>Fallicambarus harpi</i> |        | 1       | 1      | Garland    | 2             |
| 10         | 8-Apr-14  | 34.42746 | -93.2953  | <i>Fallicambarus harpi</i> | 1      | 2       |        | Garland    | Unknown       |
| 11         | 9-Apr-14  | 34.39401 | -93.35677 | <i>Fallicambarus harpi</i> |        | 1       |        | Hot Spring | 2             |
| 14         | 9-Apr-14  | 34.39405 | -93.35772 | <i>Fallicambarus harpi</i> |        |         | 1      | Hot Spring | 1             |
| 15         | 9-Apr-14  | 34.33596 | -93.51162 | <i>Fallicambarus harpi</i> |        | 1       |        | Pike       | 1             |
| 16         | 9-Apr-14  | 34.33606 | -93.51176 | <i>Fallicambarus harpi</i> |        |         | 1      | Pike       | 1             |
| 18         | 9-Apr-14  | 34.33268 | -93.52367 | <i>Fallicambarus harpi</i> | 1      | 1       | 1      | Pike       | 1             |
| 18         | 9-Apr-14  | 34.33268 | -93.52367 | <i>Fallicambarus harpi</i> |        |         | 1      | Pike       | 2             |
| 21         | 9-Apr-14  | 34.33539 | -93.5418  | <i>Fallicambarus harpi</i> | 1      |         | 2      | Pike       | 1             |
| 26         | 10-Apr-14 | 34.34728 | -93.48791 | <i>Fallicambarus harpi</i> | 1      |         |        | Montgomery | 2             |
| 26         | 10-Apr-14 | 34.34728 | -93.48791 | <i>Fallicambarus harpi</i> | 1      | 1       |        | Montgomery | 1             |
| 29         | 10-Apr-14 | 34.35593 | -93.47363 | <i>Fallicambarus harpi</i> | 1      | 1       |        | Montgomery | 1             |
| 30         | 10-Apr-14 | 34.35617 | -93.47311 | <i>Fallicambarus harpi</i> |        |         | 1      | Montgomery | 1             |
| 31         | 10-Apr-14 | 34.35578 | -93.47449 | <i>Fallicambarus harpi</i> | 1      |         | 1      | Montgomery | Unknown       |
| 35         | 10-Apr-14 | 34.37383 | -93.40457 | <i>Fallicambarus harpi</i> | 1      |         |        | Hot Spring | 1             |
| 35         | 10-Apr-14 | 34.37383 | -93.40457 | <i>Fallicambarus harpi</i> |        | 1       |        | Hot Spring | 2             |

**Table B.1 cont'd**

| Transect # | Date      | Latitude | Longitude | Species                         | Form I | Form II | Female | County     | # of openings |
|------------|-----------|----------|-----------|---------------------------------|--------|---------|--------|------------|---------------|
| 36         | 21-Apr-12 | 34.58384 | -94.14814 | <i>Procambarus reimeri</i>      |        |         | 2      | Polk       | 1             |
| 38         | 21-Apr-12 | 34.58403 | -94.14822 | <i>Procambarus reimeri</i>      | 1      |         | 1      | Polk       | 3             |
| 39         | 21-Apr-12 | 34.60709 | -94.16787 | <i>Procambarus reimeri</i>      |        |         | 1      | Polk       | 1             |
| 45         | 22-Apr-14 | 34.65405 | -94.11627 | <i>Procambarus reimeri</i>      | 1      |         |        | Polk       | 1             |
| 50         | 22-Apr-14 | 34.65777 | -94.15186 | <i>Procambarus reimeri</i>      |        | 1       |        | Polk       | 2             |
| 51         | 22-Apr-14 | 34.65734 | -94.15216 | <i>Procambarus reimeri</i>      |        |         | 1      | Polk       | 3             |
| 54         | 22-Apr-14 | 34.65041 | -94.16422 | <i>Procambarus reimeri</i>      |        |         | 1      | Polk       | 1             |
| 56         | 23-Apr-14 | 34.63678 | -94.20505 | <i>Procambarus reimeri</i>      |        |         | 1      | Polk       | 1             |
| 56         | 23-Apr-14 | 34.63678 | -94.20505 | <i>Procambarus reimeri</i>      |        |         | 2      | Polk       | 2             |
| 56         | 23-Apr-14 | 34.63678 | -94.20505 | <i>Procambarus reimeri</i>      | 1      |         |        | Polk       | 3             |
| 63         | 23-Apr-14 | 34.55721 | -94.20782 | <i>Procambarus reimeri</i>      | 1      |         |        | Polk       | 2             |
| 65         | 23-Apr-14 | 34.55682 | -94.20712 | <i>Procambarus reimeri</i>      |        |         | 2      | Polk       | 1             |
| 65         | 23-Apr-14 | 34.55682 | -94.20712 | <i>Procambarus reimeri</i>      |        |         | 1      | Polk       | 2             |
| 65         | 23-Apr-14 | 34.55682 | -94.20712 | <i>Procambarus reimeri</i>      |        |         | 1      | Polk       | 3             |
| 68         | 23-Apr-14 | 34.65411 | -94.11646 | <i>Procambarus reimeri</i>      | 2      |         |        | Polk       | 1             |
| 70         | 23-Apr-14 | 34.65422 | -94.15506 | <i>Procambarus reimeri</i>      |        |         | 2      | Polk       | 1             |
| 9          | 23-Mar-15 | 34.74965 | -92.82456 | <i>Fallicambarus fodiens</i>    | 1      |         |        | Saline     | Unknown       |
| 12         | 23-Apr-15 | 34.6647  | -93.26058 | <i>Procambarus liberorum</i>    | 1      | 1       | 2      | Garland    | 2             |
| 14         | 28-Mar-15 | 34.32955 | -93.53259 | <i>Fallicambarus harpi</i>      |        |         | 4      | Pike       | 3             |
| 14         | 28-Mar-15 | 34.32955 | -93.53259 | <i>Procambarus parasimulans</i> | 1      | 1       |        | Pike       | 2             |
| 16         | 28-Mar-15 | 34.4465  | -93.34284 | <i>Fallicambarus harpi</i>      |        | 1       |        | Garland    | 2             |
| 18         | 29-Mar-15 | 34.32352 | -93.4558  | <i>Fallicambarus harpi</i>      | 2      |         | 2      | Clark      | 2             |
| 25         | 1-Apr-15  | 34.13671 | -93.94329 | <i>Procambarus parasimulans</i> | 1      | 1       |        | Howard     | Unknown       |
| 32         | 26-Mar-15 | 34.32851 | -93.07111 | <i>Fallicambarus jeanae</i>     | 1      | 1       | 3      | Hot Spring | 3             |
| 45         | 28-Mar-15 | 34.47732 | -93.26605 | <i>Fallicambarus sp.</i>        |        | 1       | 1      | Garland    | 2             |

**Table B.1 cont'd**

| Transect # | Date      | Latitude  | Longitude    | Species                         | Form I | Form II | Female | County     | # of openings |
|------------|-----------|-----------|--------------|---------------------------------|--------|---------|--------|------------|---------------|
| 48         | 23-Mar-15 | 34.80642  | -92.77906344 | <i>Fallicambarus fodiens</i>    |        | 2       | 1      | Saline     | 1             |
| 49         | 1-Apr-15  | 34.18689  | -93.83407    | <i>Fallicambarus strawni</i>    | 2      |         | 3      | Pike       | 2             |
| 51         | 31-Mar-15 | 34.53489  | -93.56304    | <i>Procambarus reimeri</i>      | 1      |         | 1      | Montgomery | 3             |
| 52         | 29-Mar-15 | 34.40977  | -93.624246   | <i>Procambarus parasimulans</i> |        | 1       | 1      | Montgomery | Unknown       |
| 53         | 28-Mar-15 | 34.35356  | -93.47742    | <i>Fallicambarus harpi</i>      | 1      |         |        | Montgomery | 1             |
| 58         | 1-Apr-15  | 34.130704 | -93.967227   | <i>Fallicambarus strawni</i>    | 2      | 2       | 2      | Howard     | 2             |
| 68         | 26-Mar-15 | 34.44689  | -93.211023   | <i>Fallicambarus harpi</i>      | 1      |         | 2      | Garland    | 1             |
| 70         | 31-Mar-15 | 34.65402  | -93.6782     | <i>Procambarus liberorum</i>    | 1      | 3       | 1      | Montgomery | Unknown       |
| 77         | 2-Apr-15  | 34.24662  | -94.01553    | <i>Fallicambarus strawni</i>    |        | 3       | 2      | Howard     | 2             |
| 87         | 27-Mar-15 | 34.1227   | -93.55003    | <i>Fallicambarus strawni</i>    |        | 2       |        | Pike       | 3             |
| 90         | 31-Mar-15 | 34.25821  | -93.80802    | <i>Fallicambarus jeanae</i>     | 1      | 2       | 2      | Pike       | 3             |
| 92         | 26-Mar-15 | 34.30846  | -93.06246    | <i>Fallicambarus jeanae</i>     |        |         | 2      | Hot Spring | Unknown       |
| 93         | 16-Apr-15 | 34.58444  | -93.97327    | <i>Procambarus liberorum</i>    | 1      | 2       |        | Polk       | 2             |
| 94         | 26-Mar-15 | 34.31986  | -93.16096    | <i>Fallicambarus jeanae</i>     | 1      |         | 1      | Hot Spring | 3             |
| 97         | 27-Mar-15 | 34.15429  | -93.58212    | <i>Cambarus ludovicianus</i>    |        |         | 1      | Pike       | 1             |
| 97         | 27-Mar-15 | 34.15429  | -93.58212    | <i>Fallicambarus jeanae</i>     |        | 1       | 1      | Pike       | 2             |
| 97         | 27-Mar-15 | 34.15429  | -93.58212    | <i>Procambarus tulanei</i>      |        | 1       |        | Pike       | 2             |
| 104        | 25-Mar-15 | 34.64087  | -92.93977    | <i>Fallicambarus fodiens</i>    |        |         | 1      | Saline     | 1             |
| 109        | 1-Apr-15  | 34.15819  | -93.8943     | <i>Procambarus tenuis</i>       |        | 9       |        | Howard     | Unknown       |
| 117        | 2-Apr-15  | 34.09761  | -94.46558    | <i>Procambarus regalis</i>      |        | 1       | 1      | Sevier     | Unknown       |
| 120        | 23-Mar-15 | 34.74667  | -92.85654    | <i>Fallicambarus fodiens</i>    |        | 5       |        | Saline     | Unknown       |
| 132        | 29-Mar-15 | 34.26529  | -93.47874    | <i>Fallicambarus jeanae</i>     | 1      |         |        | Clark      | 2             |
| 140        | 1-Apr-15  | 34.1141   | -93.83714    | <i>Fallicambarus strawni</i>    |        | 1       |        | Howard     | Unknown       |
| 166        | 14-Apr-15 | 34.650252 | -94.164662   | <i>Procambarus reimeri</i>      | 1      |         |        | Polk       | Unknown       |
| 167        | 11-Apr-15 | 34.53557  | -94.2256     | <i>Procambarus reimeri</i>      |        | 1       |        | Polk       | 1             |
| 170        | 15-Apr-15 | 34.60364  | -94.20482    | <i>Procambarus reimeri</i>      |        | 1       | 1      | Polk       | 1             |



**Table B.1 cont'd**

| Transect # | Date      | Latitude  | Longitude  | Species                                  | Form I | Form II | Female | County     | # of openings |
|------------|-----------|-----------|------------|------------------------------------------|--------|---------|--------|------------|---------------|
| 175        | 18-Apr-15 | 34.43276  | -94.46193  | <i>Procambarus reimeri</i>               |        |         | 3      | Polk       | 1             |
| 197        | 18-Apr-15 | 34.37649  | -94.38387  | <i>Procambarus reimeri</i>               | 1      | 1       | 1      | Polk       | 2             |
| 205        | 11-Apr-15 | 34.58804  | -94.26631  | <i>Procambarus reimeri</i>               |        | 1       | 6      | Polk       | 1             |
| 216        | 10-Apr-15 | 34.63903  | -94.41092  | <i>Procambarus reimeri</i>               | 1      |         | 3      | Polk       | 3             |
| 221        | 19-Apr-15 | 34.3512   | -94.35957  | <i>Procambarus liberorum</i>             | 1      |         | 1      | Polk       | 1             |
| 236        | 18-Apr-15 | 34.39311  | -94.3336   | <i>Procambarus reimeri</i>               | 2      |         |        | Polk       | 2             |
| 239        | 2-Apr-15  | 34.36409  | -94.10996  | <i>Fallicambarus strawni</i>             |        | 1       | 1      | Polk       | 6             |
| 241        | 15-Apr-15 | 34.609934 | -94.118939 | <i>Procambarus reimeri</i>               | 1      |         |        | Polk       | 1             |
| 247        | 9-Apr-15  | 34.554    | -94.3066   | <i>Procambarus reimeri</i>               | 1      |         | 1      | Polk       | 1             |
| 259        | 15-Apr-15 | 34.58384  | -94.14469  | <i>Procambarus reimeri</i>               |        |         | 1      | Polk       | 2             |
| 269        | 15-Apr-15 | 34.570403 | -94.17729  | <i>Procambarus reimeri</i>               | 2      |         |        | Polk       | 1             |
| 279        | 14-Apr-15 | 34.643799 | -94.202914 | <i>Procambarus reimeri</i>               | 1      |         | 1      | Polk       | 2             |
| 279        | 14-Apr-15 | 34.643799 | -94.202914 | <i>Procambarus sp.</i>                   |        | 1       | 10     | Polk       | Unknown       |
| 296        | 28-Mar-15 | 34.17333  | -93.65472  | <i>Fallicambarus strawni</i>             |        | 1       |        | Pike       | Unknown       |
| 300        | 30-Mar-15 | 34.70973  | -93.46104  | <i>Procambarus sp.</i>                   |        | 11      |        | Montgomery | Unknown       |
| 307        | 27-Mar-15 | 34.14621  | -93.59632  | <i>Fallicambarus strawni</i>             |        | 1       | 3      | Pike       | 3             |
| 308        | 29-Mar-15 | 34.21942  | -93.50683  | <i>Fallicambarus jeanae x F. strawni</i> | 1      |         | 2      | Pike       | 2             |
| 318        | 30-Mar-15 | 34.8255   | -93.42265  | <i>Procambarus liberorum</i>             |        |         | 1      | Yell       | Unknown       |
| 182/234    | 10-Apr-15 | 34.59201  | -94.28992  | <i>Procambarus (Girardiella) sp.</i>     |        | 1       | 6      | Polk       | 1             |
| 207/166    | 14-Apr-15 | 34.6501   | -94.16549  | <i>Procambarus reimeri</i>               | 1      |         |        | Polk       | 1             |
|            | 7-Apr-15  | 34.25258  | -93.809908 | <i>Fallicambarus jeanae</i>              | 1      |         | 1      | Pike       | 2             |
|            | 29-Mar-15 | 34.26569  | -93.45975  | <i>Fallicambarus jeanae</i>              | 1      |         | 1      | Clark      | Unknown       |
|            | 7-Apr-15  | 34.05919  | -93.69859  | <i>Fallicambarus fodiens</i>             |        |         | 2      | Pike       | 1             |
|            | 7-Apr-15  | 34.05919  | -93.69859  | <i>Procambarus acutus</i>                |        | 3       | 1      | Pike       | 0             |
|            | 8-Apr-15  | 34.248893 | -93.628901 | <i>Fallicambarus jeanae</i>              | 1      |         | 3      | Pike       | 1             |
|            | 7-Apr-15  | 34.310806 | -93.746535 | <i>Fallicambarus sp.</i>                 |        |         | 1      | Pike       | 2             |
|            | 7-Apr-15  | 34.224156 | -93.896305 | <i>Cambarus ludovicianus</i>             |        |         | 2      | Pike       | 2             |

**Table B.1 cont'd**

| Transect # | Date     | Latitude  | Longitude  | Species                      | Form I | Form II | Female | County | # of openings |
|------------|----------|-----------|------------|------------------------------|--------|---------|--------|--------|---------------|
|            | 7-Apr-15 | 34.224156 | -93.896305 | <i>Fallicambarus strawni</i> |        |         | 2      | Pike   | 2             |
|            | 8-Apr-15 | 34.106697 | -93.879246 | <i>Fallicambarus fodiens</i> |        | 1       | 7      | Howard | 2             |
|            | 8-Apr-15 | 34.106697 | -93.879246 | <i>Fallicambarus jeanae</i>  |        | 1       | 6      | Howard | 2             |
|            | 8-Apr-15 | 34.042506 | -93.737006 | <i>Fallicambarus jeanae</i>  | 1      | 1       | 1      | Pike   | 2             |
|            | 7-Apr-15 | 34.05585  | -93.7023   | <i>Fallicambarus sp.</i>     |        |         | 14     | Pike   | 1             |
|            | 7-Apr-15 | 34.05585  | -93.7023   | <i>Procambarus sp.</i>       |        | 2       | 16     | Pike   | 0             |
|            | 7-Apr-15 | 34.073844 | -93.676618 | <i>Fallicambarus jeanae</i>  | 1      |         | 3      | Pike   |               |
|            | 8-Apr-15 | 34.23484  | -93.51176  | <i>Fallicambarus jeanae</i>  |        |         | 1      | Pike   | 1             |
|            | 8-Apr-15 | 34.08532  | -93.70537  | <i>Fallicambarus jeanae</i>  | 1      | 1       | 9      | Pike   | 2             |
|            | 7-Apr-15 | 34.08194  | -93.66749  | <i>Fallicambarus sp.</i>     |        |         | 2      | Pike   |               |

### APPENDIX C: *FALLICAMBARUS HARPI* SAMPLING SUPPLEMENTARY MATERIAL

**Table C.1: Habitat covariates and counts measured at each quadrat for *Fallicambarus harpi* in western Arkansas in the spring of 2014 and 2015. See Table 2.1 in main body of thesis for a description of each variable. The water\_trns corresponds to the water\_trans covariate in the main body, this variable was not measured in 2015. The burrow ownership column depicts the assumed ownership of each burrow counted in the corresponding quadrat.**

| Site | Transect | Quadrat | Date     | Latitude  | Longitude  | Canopy | Herb | Sedge | Stem | Burrow | Elevation | Solar   | Water_dist | CTI   | Sand  | Silt  | Clay  | Burrow ownership | Water_trns |
|------|----------|---------|----------|-----------|------------|--------|------|-------|------|--------|-----------|---------|------------|-------|-------|-------|-------|------------------|------------|
| 1    | 1        | 1       | 4/8/2014 | 34.444382 | -93.212699 | 0      | 96   | 1     | 14   | 1      | 172.07    | 6215.49 | 327.01     | 6.55  | 29.55 | 51.43 | 19.02 | <i>F. harpi</i>  | N          |
| 1    | 1        | 2       | 4/8/2014 | 34.44436  | -93.212593 | 0      | 90   | 0     | 20   | 0      | 172.03    | 6214.54 | 317.12     | 6.53  | 29.55 | 51.43 | 19.02 |                  | N          |
| 1    | 1        | 3       | 4/8/2014 | 34.444338 | -93.212486 | 0      | 70   | 0     | 33   | 4      | 171.40    | 6212.66 | 307.15     | 7.63  | 36.13 | 49.16 | 14.71 | <i>F. harpi</i>  | N          |
| 1    | 1        | 4       | 4/8/2014 | 34.444315 | -93.212379 | 0      | 95   | 1     | 8    | 4      | 171.08    | 6211.40 | 297.18     | 7.65  | 36.13 | 49.16 | 14.71 | <i>F. harpi</i>  | N          |
| 1    | 1        | 5       | 4/8/2014 | 34.444293 | -93.212272 | 0      | 91   | 0     | 26   | 3      | 170.85    | 6211.70 | 287.22     | 8.34  | 35.01 | 48.22 | 16.63 | <i>F. harpi</i>  | N          |
| 1    | 1        | 6       | 4/8/2014 | 34.444271 | -93.212165 | 1      | 87   | 0     | 9    | 0      | 170.76    | 6211.81 | 277.29     | 9.40  | 35.01 | 48.22 | 16.63 |                  | N          |
| 1    | 2        | 7       | 4/8/2014 | 34.444024 | -93.212069 | 0      | 92   | 0     | 7    | 0      | 170.12    | 6210.04 | 268.56     | 8.20  | 27.85 | 59.98 | 12.17 |                  | N          |
| 1    | 2        | 8       | 4/8/2014 | 34.444002 | -93.211962 | 0      | 97   | 0     | 15   | 1      | 170.17    | 6210.01 | 258.90     | 8.03  | 27.85 | 59.98 | 12.17 | <i>F. harpi</i>  | N          |
| 1    | 2        | 9       | 4/8/2014 | 34.44398  | -93.211855 | 0      | 96   | 1     | 35   | 5      | 170.12    | 6209.98 | 249.27     | 8.03  | 28.36 | 57.53 | 14.11 | <i>F. harpi</i>  | N          |
| 1    | 2        | 10      | 4/8/2014 | 34.443958 | -93.211748 | 0      | 99   | 0     | 11   | 2      | 170.23    | 6209.73 | 239.68     | 8.04  | 28.36 | 57.53 | 14.11 | <i>F. harpi</i>  | N          |
| 1    | 2        | 11      | 4/8/2014 | 34.443936 | -93.211641 | 0      | 98   | 0     | 22   | 1      | 170.36    | 6210.38 | 230.14     | 7.27  | 33.03 | 53.27 | 13.37 | <i>F. harpi</i>  | N          |
| 1    | 2        | 12      | 4/8/2014 | 34.443914 | -93.211534 | 0      | 97   | 1     | 21   | 4      | 170.42    | 6210.70 | 220.65     | 8.06  | 33.03 | 53.27 | 13.37 | <i>F. harpi</i>  | N          |
| 1    | 3        | 13      | 4/8/2014 | 34.443901 | -93.210743 | 71     | 100  | 0     | 26   | 0      | 170.66    | 6209.84 | 148.87     | 8.30  | 34.17 | 52.68 | 13    |                  | Y          |
| 1    | 3        | 14      | 4/8/2014 | 34.443879 | -93.210636 | 5      | 97   | 0     | 34   | 0      | 170.66    | 6210.26 | 139.60     | 7.56  | 34.17 | 52.68 | 13    |                  | Y          |
| 1    | 3        | 15      | 4/8/2014 | 34.443857 | -93.210529 | 1      | 100  | 0     | 36   | 0      | 170.65    | 6209.95 | 130.45     | 8.79  | 26.02 | 52.88 | 21.1  |                  | Y          |
| 1    | 3        | 16      | 4/8/2014 | 34.443835 | -93.210422 | 0      | 97   | 1     | 0    | 1      | 170.65    | 6209.91 | 121.47     | 8.81  | 26.02 | 52.88 | 21.1  | <i>F. harpi</i>  | Y          |
| 1    | 3        | 17      | 4/8/2014 | 34.443813 | -93.210315 | 0      | 96   | 1     | 10   | 0      | 170.66    | 6210.07 | 112.68     | 9.60  | 31.4  | 53.16 | 15.44 |                  | Y          |
| 1    | 3        | 18      | 4/8/2014 | 34.443791 | -93.210209 | 30     | 97   | 1     | 9    | 0      | 170.50    | 6209.33 | 104.21     | 9.47  | 31.4  | 53.16 | 15.44 |                  | Y          |
| 2    | 4        | 19      | 4/8/2014 | 34.43239  | -93.27458  | 0      | 25   | 1     | 9    | 0      | 178.64    | 6213.54 | 131.09     | 8.12  | 26.32 | 50.83 | 22.85 |                  | Y          |
| 2    | 4        | 20      | 4/8/2014 | 34.432372 | -93.274688 | 0      | 22   | 1     | 9    | 0      | 178.42    | 6211.96 | 135.81     | 8.14  | 26.32 | 50.83 | 22.85 |                  | Y          |
| 2    | 4        | 21      | 4/8/2014 | 34.432355 | -93.274796 | 0      | 96   | 0     | 23   | 0      | 178.08    | 6210.38 | 141.18     | 9.40  | 34.92 | 51    | 14.08 |                  | Y          |
| 2    | 4        | 22      | 4/8/2014 | 34.432337 | -93.274904 | 0      | 82   | 1     | 32   | 0      | 177.73    | 6210.74 | 146.97     | 9.67  | 34.92 | 51    | 14.08 |                  | Y          |
| 2    | 4        | 23      | 4/8/2014 | 34.43232  | -93.275012 | 0      | 95   | 1     | 28   | 1      | 177.04    | 6214.75 | 153.28     | 10.48 | 47.4  | 44.48 | 8.12  | <i>F. harpi</i>  | Y          |

Table C.1 cont'd

| Site | Transect | Quadrat | Date     | Latitude  | Longitude  | Canopy | Herb | Sedge | Stem | Burrow | Elevation | Solar   | Water_dist | CTI   | Sand  | Silt  | Clay  | Burrow ownership | Water_trns |
|------|----------|---------|----------|-----------|------------|--------|------|-------|------|--------|-----------|---------|------------|-------|-------|-------|-------|------------------|------------|
| 2    | 4        | 24      | 4/8/2014 | 34.432302 | -93.275119 | 1      | 32   | 1     | 17   | 0      | 176.75    | 6213.06 | 159.82     | 12.71 | 47.4  | 44.48 | 8.12  |                  | Y          |
| 2    | 5        | 25      | 4/8/2014 | 34.43214  | -93.27487  | 84     | 2    | 0     | 0    | 0      | 177.53    | 6209.28 | 130.73     | 7.84  | 26.46 | 57.32 | 16.22 |                  | N          |
| 2    | 5        | 26      | 4/8/2014 | 34.432123 | -93.274978 | 3      | 1    | 0     | 0    | 0      | 177.12    | 6210.34 | 137.67     | 7.64  | 26.46 | 57.32 | 16.22 |                  | N          |
| 2    | 5        | 27      | 4/8/2014 | 34.432105 | -93.275086 | 92     | 21   | 0     | 0    | 0      | 176.83    | 6209.64 | 144.93     | 7.34  | 53.44 | 38.24 | 8.32  |                  | N          |
| 2    | 5        | 28      | 4/8/2014 | 34.432087 | -93.275194 | 97     | 3    | 0     | 0    | 0      | 176.56    | 6213.28 | 152.51     | 9.05  | 53.44 | 38.24 | 8.32  |                  | N          |
| 2    | 5        | 29      | 4/8/2014 | 34.43207  | -93.275302 | 98     | 23   | 0     | 1    | 0      | 176.52    | 6214.63 | 160.42     | 12.38 | 43.09 | 45.6  | 10.92 |                  | N          |
| 2    | 5        | 30      | 4/8/2014 | 34.432052 | -93.275409 | 100    | 7    | 1     | 0    | 0      | 176.63    | 6215.16 | 168.44     | 7.90  | 43.09 | 45.6  | 10.92 |                  | N          |
| 2    | 6        | 31      | 4/8/2014 | 34.43238  | -93.2755   | 29     | 85   | 0     | 8    | 1      | 177.42    | 6217.43 | 169.37     | 8.01  | 44    | 43.68 | 12.32 | <i>F. harpi</i>  | Y          |
| 2    | 6        | 32      | 4/8/2014 | 34.432363 | -93.275608 | 6      | 52   | 1     | 50   | 0      | 177.48    | 6216.95 | 162.50     | 8.92  | 44    | 43.68 | 12.32 |                  | Y          |
| 2    | 6        | 33      | 4/8/2014 | 34.432345 | -93.275716 | 1      | 84   | 1     | 3    | 0      | 177.57    | 6215.81 | 155.84     | 8.40  | 43.67 | 46.69 | 9.64  |                  | Y          |
| 2    | 6        | 34      | 4/8/2014 | 34.432327 | -93.275824 | 28     | 56   | 1     | 32   | 0      | 177.64    | 6214.15 | 149.18     | 8.72  | 43.67 | 46.69 | 9.64  |                  | Y          |
| 2    | 6        | 35      | 4/8/2014 | 34.43231  | -93.275932 | 74     | 94   | 1     | 12   | 0      | 177.67    | 6212.30 | 142.71     | 8.02  | 40.8  | 46.37 | 12.48 |                  | Y          |
| 2    | 6        | 36      | 4/8/2014 | 34.432292 | -93.276039 | 32     | 84   | 1     | 5    | 0      | 177.63    | 6211.04 | 136.82     | 9.41  | 40.8  | 46.37 | 12.48 |                  | Y          |
| 3    | 7        | 37      | 4/8/2014 | 34.427891 | -93.293133 | 0      | 100  | 0     | 33   | 0      | 181.99    | 6217.31 | 181.44     | 7.60  | 46.85 | 41.14 | 12.01 |                  | N          |
| 3    | 7        | 38      | 4/8/2014 | 34.427913 | -93.293024 | 0      | 100  | 0     | 30   | 0      | 182.08    | 6216.44 | 191.17     | 7.83  | 46.85 | 41.14 | 12.01 |                  | N          |
| 3    | 7        | 39      | 4/8/2014 | 34.427934 | -93.292915 | 0      | 100  | 0     | 25   | 0      | 182.19    | 6215.59 | 184.09     | 7.94  | 41.78 | 45.85 | 12.37 |                  | N          |
| 3    | 7        | 40      | 4/8/2014 | 34.427956 | -93.292806 | 0      | 93   | 0     | 22   | 0      | 182.26    | 6215.39 | 177.23     | 7.94  | 41.78 | 45.85 | 12.37 |                  | N          |
| 3    | 7        | 41      | 4/8/2014 | 34.427977 | -93.292697 | 0      | 100  | 0     | 21   | 0      | 182.45    | 6216.07 | 170.82     | 7.85  | 41.5  | 47.53 | 10.97 |                  | N          |
| 3    | 7        | 42      | 4/8/2014 | 34.427999 | -93.292588 | 0      | 100  | 0     | 26   | 0      | 182.54    | 6216.19 | 164.70     | 8.82  | 41.5  | 47.53 | 10.97 |                  | N          |
| 3    | 8        | 43      | 4/8/2014 | 34.42776  | -93.29308  | 26     | 100  | 0     | 12   | 0      | 181.63    | 6211.70 | 179.84     | 8.78  | 40.81 | 50    | 9.19  |                  | Y          |
| 3    | 8        | 44      | 4/8/2014 | 34.427781 | -93.292971 | 36     | 99   | 0     | 12   | 0      | 181.85    | 6214.96 | 190.01     | 8.01  | 40.81 | 50    | 9.19  |                  | Y          |
| 3    | 8        | 45      | 4/8/2014 | 34.427803 | -93.292862 | 0      | 94   | 1     | 22   | 2      | 182.09    | 6215.04 | 194.72     | 8.59  | 29    | 58.82 | 12.18 | <i>F. Harpi</i>  | Y          |
| 3    | 8        | 46      | 4/8/2014 | 34.427824 | -93.292753 | 0      | 86   | 0     | 5    | 0      | 182.18    | 6214.39 | 188.42     | 8.21  | 29    | 58.82 | 12.18 |                  | Y          |
| 3    | 8        | 47      | 4/8/2014 | 34.427846 | -93.292644 | 0      | 88   | 1     | 20   | 3      | 182.27    | 6213.52 | 182.38     | 8.32  | 35.65 | 54.13 | 10.22 | <i>F. Harpi</i>  | Y          |
| 3    | 8        | 48      | 4/8/2014 | 34.427867 | -93.292535 | 0      | 94   | 1     | 6    | 1      | 182.32    | 6212.88 | 176.84     | 11.49 | 35.65 | 54.13 | 10.22 | <i>F. Harpi</i>  | Y          |
| 3    | 9        | 49      | 4/8/2014 | 34.428028 | -93.293175 | 72     | 69   | 1     | 14   | 0      | 182.14    | 6215.92 | 185.50     | 11.15 | 43.73 | 45.48 | 10.79 |                  | N          |

**Table C.1 cont'd**

| Site | Transect | Quadrat | Date     | Latitude  | Longitude  | Canopy | Herb | Sedge | Stem | Burrow | Elevation | Solar   | Water_dist | CTI   | Sand  | Silt  | Clay  | Burrow ownership | Water trns |
|------|----------|---------|----------|-----------|------------|--------|------|-------|------|--------|-----------|---------|------------|-------|-------|-------|-------|------------------|------------|
| 3    | 9        | 50      | 4/8/2014 | 34.428    | -93.293282 | 85     | 52   | 0     | 15   | 0      | 182.01    | 6216.40 | 175.52     | 11.86 | 43.73 | 45.48 | 10.79 |                  | N          |
| 3    | 9        | 51      | 4/8/2014 | 34.427972 | -93.293389 | 98     | 66   | 1     | 3    | 0      | 181.85    | 6217.58 | 165.58     | 7.33  | 45.61 | 38.49 | 15.9  |                  | N          |
| 3    | 9        | 52      | 4/8/2014 | 34.427944 | -93.293497 | 0      | 80   | 1     | 3    | 0      | 181.47    | 6216.37 | 155.61     | 7.34  | 45.61 | 38.49 | 15.9  |                  | N          |
| 3    | 9        | 53      | 4/8/2014 | 34.427916 | -93.293604 | 91     | 90   | 0     | 10   | 0      | 181.43    | 6216.85 | 145.78     | 11.99 | 45.84 | 29.4  | 19.63 |                  | N          |
| 3    | 9        | 54      | 4/8/2014 | 34.427888 | -93.293711 | 95     | 3    | 0     | 4    | 0      | 181.30    | 6218.55 | 136.02     | 7.19  | 45.84 | 29.4  | 19.63 |                  | N          |
| 3    | 10       | 55      | 4/8/2014 | 34.42746  | -93.2953   | 0      | 77   | 0     | 19   | 0      | 176.32    | 6214.39 | 32.16      | 7.83  | 33.19 | 46.42 | 20.4  |                  | Y          |
| 3    | 10       | 56      | 4/8/2014 | 34.427429 | -93.295405 | 0      | 96   | 1     | 34   | 0      | 176.30    | 6214.07 | 30.80      | 7.76  | 33.19 | 46.42 | 20.4  |                  | Y          |
| 3    | 10       | 57      | 4/8/2014 | 34.427399 | -93.295511 | 0      | 93   | 1     | 36   | 0      | 175.72    | 6213.40 | 30.18      | 7.25  | 37.78 | 47.93 | 14.29 |                  | Y          |
| 3    | 10       | 58      | 4/8/2014 | 34.427368 | -93.295616 | 0      | 95   | 1     | 17   | 0      | 175.64    | 6213.92 | 29.70      | 11.55 | 37.78 | 47.93 | 14.29 |                  | Y          |
| 3    | 10       | 59      | 4/8/2014 | 34.427338 | -93.295722 | 0      | 97   | 1     | 19   | 0      | 175.58    | 6214.33 | 29.36      | 6.87  | 40.25 | 45.18 | 14.42 |                  | Y          |
| 3    | 10       | 60      | 4/8/2014 | 34.427307 | -93.295827 | 0      | 89   | 0     | 22   | 0      | 175.07    | 6213.32 | 29.73      | 6.84  | 40.25 | 45.18 | 14.42 |                  | Y          |
| 4    | 11       | 61      | 4/9/2014 | 34.393746 | -93.357599 | 8      | 90   | 1     | 18   | 0      | 214.37    | 6227.02 | 49.42      | 6.71  | 43.58 | 44.6  | 11.81 |                  | N          |
| 4    | 11       | 62      | 4/9/2014 | 34.393709 | -93.357699 | 0      | 88   | 1     | 21   | 0      | 214.29    | 6228.65 | 52.85      | 6.73  | 43.58 | 44.6  | 11.81 |                  | N          |
| 4    | 11       | 63      | 4/9/2014 | 34.393673 | -93.3578   | 1      | 88   | 1     | 11   | 0      | 213.92    | 6237.21 | 56.13      | 6.79  | 46.35 | 41.83 | 11.82 |                  | N          |
| 4    | 11       | 64      | 4/9/2014 | 34.393637 | -93.3579   | 4      | 100  | 1     | 22   | 0      | 213.77    | 6236.50 | 57.93      | 9.01  | 46.35 | 41.83 | 11.82 |                  | N          |
| 4    | 11       | 65      | 4/9/2014 | 34.393601 | -93.358001 | 0      | 100  | 1     | 33   | 0      | 213.52    | 6233.49 | 57.99      | 7.77  | 45.54 | 41.34 | 13.12 |                  | N          |
| 4    | 11       | 66      | 4/9/2014 | 34.393565 | -93.358101 | 6      | 100  | 1     | 16   | 0      | 213.52    | 6232.51 | 58.09      | 9.98  | 45.54 | 41.34 | 13.12 |                  | N          |
| 4    | 12       | 67      | 4/9/2014 | 34.393711 | -93.357577 | 1      | 84   | 0     | 4    | 0      | 214.48    | 6223.65 | 53.34      | 6.91  | 35.69 | 47.53 | 16.78 |                  | Y          |
| 4    | 12       | 68      | 4/9/2014 | 34.393675 | -93.357678 | 5      | 96   | 1     | 7    | 0      | 214.37    | 6230.82 | 56.75      | 6.73  | 35.69 | 47.53 | 16.78 |                  | Y          |
| 4    | 12       | 69      | 4/9/2014 | 34.39364  | -93.357778 | 2      | 96   | 1     | 3    | 0      | 213.92    | 6237.21 | 59.96      | 8.08  | 27.7  | 55.81 | 16.49 |                  | Y          |
| 4    | 12       | 70      | 4/9/2014 | 34.393604 | -93.357879 | 1      | 10   | 0     | 0    | 0      | 213.51    | 6234.70 | 62.05      | 9.01  | 27.7  | 55.81 | 16.49 |                  | Y          |
| 4    | 12       | 71      | 4/9/2014 | 34.393568 | -93.357979 | 3      | 80   | 1     | 4    | 0      | 213.52    | 6233.49 | 62.15      | 12.17 | 45.45 | 40.59 | 13.96 |                  | Y          |
| 4    | 12       | 72      | 4/9/2014 | 34.393532 | -93.35808  | 24     | 68   | 1     | 6    | 0      | 213.52    | 6232.51 | 62.22      | 9.98  | 45.45 | 40.59 | 13.96 |                  | Y          |
| 4    | 13       | 73      | 4/9/2014 | 34.39364  | -93.357531 | 98     | 3    | 0     | 0    | 0      | 214.67    | 6224.49 | 60.83      | 7.81  | 39.41 | 48.79 | 11.8  |                  | N          |
| 4    | 13       | 74      | 4/9/2014 | 34.393606 | -93.357632 | 96     | 15   | 0     | 0    | 0      | 214.32    | 6226.25 | 64.69      | 6.54  | 39.41 | 48.79 | 11.8  |                  | N          |
| 4    | 13       | 75      | 4/9/2014 | 34.393571 | -93.357734 | 97     | 3    | 0     | 1    | 0      | 213.83    | 6231.00 | 67.88      | 7.78  | 38.3  | 55.6  | 6.1   |                  | N          |
| 4    | 13       | 76      | 4/9/2014 | 34.393537 | -93.357835 | 99     | 10   | 0     | 5    | 0      | 213.54    | 6234.55 | 70.39      | 12.18 | 38.3  | 55.6  | 6.1   |                  | N          |

Table C.1 cont'd

| Site | Transect | Quadrat | Date     | Latitude  | Longitude  | Canopy | Herb | Sedge | Stem | Burrow | Elevation | Solar   | Water_dist | CTI   | Sand  | Silt  | Clay  | Burrow ownership | Water trns |
|------|----------|---------|----------|-----------|------------|--------|------|-------|------|--------|-----------|---------|------------|-------|-------|-------|-------|------------------|------------|
| 4    | 13       | 77      | 4/9/2014 | 34.393503 | -93.357936 | 100    | 15   | 0     | 5    | 0      | 213.52    | 6230.65 | 70.33      | 12.17 | 41.3  | 46.31 | 12.39 |                  | N          |
| 4    | 13       | 78      | 4/9/2014 | 34.393469 | -93.358038 | 96     | 35   | 0     | 2    | 0      | 213.52    | 6230.88 | 70.15      | 11.15 | 41.3  | 46.31 | 12.39 |                  | N          |
| 4    | 14       | 79      | 4/9/2014 | 34.39405  | -93.35772  | 100    | 8    | 1     | 9    | 0      | 213.08    | 6201.24 | 15.00      | 6.75  | 31.6  | 55.12 | 13.27 |                  | Y          |
| 4    | 14       | 80      | 4/9/2014 | 34.394016 | -93.357821 | 98     | 3    | 1     | 0    | 0      | 212.76    | 6202.52 | 18.09      | 6.83  | 31.6  | 55.12 | 13.27 |                  | Y          |
| 4    | 14       | 81      | 4/9/2014 | 34.393982 | -93.357923 | 96     | 3    | 0     | 0    | 0      | 212.50    | 6204.66 | 20.56      | 6.90  | 25.76 | 55.96 | 18.28 |                  | Y          |
| 4    | 14       | 82      | 4/9/2014 | 34.393947 | -93.358024 | 98     | 8    | 1     | 0    | 0      | 212.75    | 6201.97 | 21.83      | 6.54  | 25.76 | 55.96 | 18.28 |                  | Y          |
| 4    | 14       | 83      | 4/9/2014 | 34.393913 | -93.358126 | 100    | 1    | 0     | 0    | 0      | 212.41    | 6199.01 | 21.65      | 6.53  | 40.07 | 49.53 | 9.83  |                  | Y          |
| 4    | 14       | 84      | 4/9/2014 | 34.393879 | -93.358227 | 100    | 1    | 1     | 0    | 0      | 212.82    | 6193.76 | 21.51      | 9.65  | 40.07 | 49.53 | 9.83  |                  | Y          |
| 5    | 15       | 85      | 4/9/2014 | 34.33596  | -93.51162  | 0      | 100  | 1     | 43   | 0      | 183.21    | 6167.98 | 432.27     | 7.20  | 36.81 | 44.37 | 18.82 |                  | N          |
| 5    | 15       | 86      | 4/9/2014 | 34.335998 | -93.511521 | 0      | 100  | 0     | 31   | 0      | 183.77    | 6158.19 | 423.47     | 6.73  | 36.81 | 44.37 | 18.82 |                  | N          |
| 5    | 15       | 87      | 4/9/2014 | 34.336036 | -93.511422 | 0      | 100  | 0     | 27   | 0      | 183.75    | 6170.86 | 414.72     | 7.40  | 32.81 | 41.86 | 25.33 |                  | N          |
| 5    | 15       | 88      | 4/9/2014 | 34.336074 | -93.511323 | 0      | 100  | 1     | 34   | 0      | 184.33    | 6172.15 | 406.04     | 7.20  | 32.81 | 41.86 | 25.33 |                  | N          |
| 5    | 15       | 89      | 4/9/2014 | 34.336112 | -93.511224 | 0      | 100  | 1     | 33   | 0      | 184.25    | 6179.89 | 397.42     | 12.18 | 39.27 | 45.86 | 14.87 |                  | N          |
| 5    | 15       | 90      | 4/9/2014 | 34.33615  | -93.511124 | 0      | 100  | 0     | 20   | 0      | 184.75    | 6178.99 | 388.81     | 12.05 | 39.27 | 45.86 | 14.87 |                  | N          |
| 5    | 16       | 91      | 4/9/2014 | 34.33606  | -93.51176  | 0      | 28   | 1     | 3    | 0      | 182.18    | 6198.48 | 431.30     | 8.17  | 16.6  | 56.1  | 27.3  |                  | Y          |
| 5    | 16       | 92      | 4/9/2014 | 34.336098 | -93.511661 | 0      | 76   | 1     | 16   | 0      | 182.67    | 6184.76 | 422.39     | 7.56  | 16.6  | 56.1  | 27.3  |                  | Y          |
| 5    | 16       | 93      | 4/9/2014 | 34.336136 | -93.511562 | 0      | 80   | 1     | 37   | 0      | 182.77    | 6189.36 | 413.51     | 12.35 | 20.49 | 57.79 | 21.72 |                  | Y          |
| 5    | 16       | 94      | 4/9/2014 | 34.336174 | -93.511463 | 0      | 88   | 1     | 32   | 0      | 183.25    | 6180.86 | 404.62     | 12.15 | 20.49 | 57.79 | 21.72 |                  | Y          |
| 5    | 16       | 95      | 4/9/2014 | 34.336212 | -93.511364 | 0      | 88   | 1     | 39   | 2      | 183.33    | 6184.74 | 395.79     | 6.18  | 14.12 | 53.03 | 32.85 | <i>F. harpi</i>  | Y          |
| 5    | 16       | 96      | 4/9/2014 | 34.33625  | -93.511264 | 0      | 97   | 1     | 44   | 2      | 183.85    | 6186.10 | 386.97     | 6.24  | 14.12 | 53.03 | 32.85 | <i>F. harpi</i>  | Y          |
| 5    | 17       | 97      | 4/9/2014 | 34.33521  | -93.51141  | 0      | 100  | 0     | 44   | 0      | 188.69    | 6193.52 | 395.74     | 5.79  | 38.87 | 43.1  | 17.95 |                  | N          |
| 5    | 17       | 98      | 4/9/2014 | 34.335248 | -93.511311 | 0      | 98   | 0     | 26   | 0      | 189.39    | 6169.24 | 402.76     | 7.24  | 38.87 | 43.1  | 17.95 |                  | N          |
| 5    | 17       | 99      | 4/9/2014 | 34.335286 | -93.511212 | 0      | 96   | 0     | 30   | 0      | 189.51    | 6181.50 | 399.62     | 6.29  | 30.32 | 58.05 | 11.63 |                  | N          |
| 5    | 17       | 100     | 4/9/2014 | 34.335324 | -93.511113 | 0      | 100  | 0     | 27   | 0      | 190.80    | 6146.43 | 394.09     | 7.12  | 30.32 | 58.05 | 11.63 |                  | N          |
| 5    | 17       | 101     | 4/9/2014 | 34.335362 | -93.511014 | 0      | 98   | 0     | 36   | 0      | 193.05    | 6130.11 | 388.74     | 6.35  | 37.47 | 43.46 | 18.78 |                  | N          |

Table C.1 cont'd

| Site | Transect | Quadrat | Date     | Latitude  | Longitude  | Canopy | Herb | Sedge | Stem | Burrow | Elevation | Solar   | Water_dist | CTI   | Sand  | Silt  | Clay  | Burrow ownership | Water trns |
|------|----------|---------|----------|-----------|------------|--------|------|-------|------|--------|-----------|---------|------------|-------|-------|-------|-------|------------------|------------|
| 5    | 17       | 102     | 4/9/2014 | 34.3354   | -93.510914 | 0      | 76   | 0     | 29   | 0      | 192.70    | 6140.15 | 383.50     | 6.50  | 37.47 | 43.46 | 18.78 |                  | N          |
| 6    | 18       | 103     | 4/9/2014 | 34.33268  | -93.52367  | 0      | 92   | 1     | 0    | 0      | 170.71    | 6202.88 | 75.38      | 8.13  | 42.28 | 49.33 | 8.39  |                  | Y          |
| 6    | 18       | 104     | 4/9/2014 | 34.332713 | -93.523568 | 0      | 20   | 1     | 8    | 0      | 170.69    | 6197.48 | 72.25      | 7.33  | 42.28 | 49.33 | 8.39  |                  | Y          |
| 6    | 18       | 105     | 4/9/2014 | 34.332745 | -93.523466 | 0      | 28   | 1     | 7    | 0      | 170.68    | 6197.36 | 69.61      | 8.31  | 31.8  | 56.21 | 11.99 |                  | Y          |
| 6    | 18       | 106     | 4/9/2014 | 34.332778 | -93.523364 | 0      | 16   | 1     | 0    | 0      | 170.43    | 6193.91 | 67.62      | 7.67  | 31.8  | 56.21 | 11.99 |                  | Y          |
| 6    | 18       | 107     | 4/9/2014 | 34.332811 | -93.523262 | 0      | 100  | 1     | 19   | 0      | 170.51    | 6195.86 | 67.10      | 8.25  | 33.27 | 56.02 | 10.7  |                  | Y          |
| 6    | 18       | 108     | 4/9/2014 | 34.332844 | -93.52316  | 0      | 92   | 1     | 12   | 0      | 170.59    | 6197.12 | 68.08      | 10.78 | 33.27 | 56.02 | 10.7  |                  | Y          |
| 6    | 19       | 109     | 4/9/2014 | 34.33297  | -93.52381  | 0      | 2    | 1     | 3    | 1      | 169.97    | 6198.11 | 44.48      | 11.08 | 25.02 | 57.76 | 17.22 | <i>F. harpi</i>  | Y          |
| 6    | 19       | 110     | 4/9/2014 | 34.333003 | -93.523708 | 0      | 2    | 1     | 0    | 0      | 170.02    | 6199.57 | 39.76      | 9.01  | 25.02 | 57.76 | 17.22 |                  | Y          |
| 6    | 19       | 111     | 4/9/2014 | 34.333035 | -93.523606 | 0      | 60   | 1     | 4    | 0      | 170.09    | 6200.88 | 36.37      | 11.74 | 20.34 | 64.64 | 15.02 |                  | Y          |
| 6    | 19       | 112     | 4/9/2014 | 34.333068 | -93.523504 | 0      | 16   | 1     | 4    | 0      | 170.05    | 6200.84 | 33.62      | 8.07  | 20.34 | 64.64 | 15.02 |                  | Y          |
| 6    | 19       | 113     | 4/9/2014 | 34.333101 | -93.523402 | 0      | 40   | 1     | 4    | 0      | 170.06    | 6201.19 | 32.46      | 9.82  | 16.64 | 65.95 | 17.41 |                  | Y          |
| 6    | 19       | 114     | 4/9/2014 | 34.333134 | -93.5233   | 0      | 100  | 1     | 22   | 0      | 170.15    | 6201.42 | 34.35      | 9.15  | 16.64 | 65.95 | 17.41 |                  | Y          |
| 6    | 20       | 115     | 4/9/2014 | 34.33226  | -93.52361  | 0      | 100  | 0     | 28   | 1      | 170.15    | 6211.00 | 122.06     | 8.01  | 33.93 | 56.6  | 9.47  | <i>F. harpi</i>  | N          |
| 6    | 20       | 116     | 4/9/2014 | 34.332237 | -93.523715 | 0      | 32   | 1     | 19   | 1      | 170.32    | 6211.58 | 118.35     | 7.89  | 33.93 | 56.6  | 9.47  | <i>F. harpi</i>  | N          |
| 6    | 20       | 117     | 4/9/2014 | 34.332214 | -93.523821 | 0      | 96   | 0     | 9    | 1      | 170.14    | 6210.91 | 110.23     | 8.01  | 45.32 | 48.02 | 6.66  | <i>F. harpi</i>  | N          |
| 6    | 20       | 118     | 4/9/2014 | 34.332191 | -93.523926 | 0      | 84   | 0     | 22   | 0      | 170.20    | 6211.34 | 102.23     | 8.82  | 45.32 | 48.02 | 6.66  |                  | N          |
| 6    | 20       | 119     | 4/9/2014 | 34.332168 | -93.524032 | 0      | 38   | 1     | 4    | 0      | 170.28    | 6211.69 | 94.53      | 7.52  | 44.78 | 44.54 | 10.68 |                  | N          |
| 6    | 20       | 120     | 4/9/2014 | 34.332145 | -93.524137 | 0      | 38   | 0     | 14   | 0      | 170.29    | 6212.02 | 87.36      | 7.89  | 44.78 | 44.54 | 10.68 |                  | N          |
| 7    | 21       | 121     | 4/9/2014 | 34.33539  | -93.5418   | 92     | 40   | 1     | 3    | 1      | 186.43    | 6222.50 | 110.75     | 7.32  | 32.47 | 50.97 | 16.56 | <i>F. harpi</i>  | N          |
| 7    | 21       | 122     | 4/9/2014 | 34.335298 | -93.541801 | 100    | 3    | 0     | 0    | 0      | 186.04    | 6222.62 | 101.65     | 7.64  | 32.47 | 50.97 | 16.56 |                  | N          |
| 7    | 21       | 123     | 4/9/2014 | 34.335206 | -93.541803 | 100    | 1    | 0     | 0    | 0      | 185.70    | 6221.54 | 92.82      | 8.68  | 33.76 | 52.09 | 14.14 |                  | N          |
| 7    | 21       | 124     | 4/9/2014 | 34.335114 | -93.541804 | 99     | 1    | 1     | 3    | 0      | 185.47    | 6221.48 | 84.24      | 7.46  | 33.76 | 52.09 | 14.14 |                  | N          |
| 7    | 21       | 125     | 4/9/2014 | 34.335022 | -93.541805 | 100    | 1    | 0     | 1    | 0      | 185.18    | 6221.79 | 76.07      | 8.33  | 32.77 | 51.86 | 15.37 |                  | N          |
| 7    | 21       | 126     | 4/9/2014 | 34.33493  | -93.541806 | 100    | 1    | 0     | 0    | 0      | 184.89    | 6222.16 | 68.45      | 7.35  | 32.77 | 51.86 | 15.37 |                  | N          |
| 7    | 22       | 127     | 4/9/2014 | 34.33554  | -93.54141  | 98     | 3    | 0     | 0    | 1      | 187.39    | 6219.12 | 115.74     | 9.19  | 38.83 | 49.76 | 11.41 | <i>F. harpi</i>  | N          |
| 7    | 22       | 128     | 4/9/2014 | 34.335448 | -93.541411 | 96     | 84   | 1     | 8    | 0      | 187.15    | 6221.01 | 105.75     | 6.81  | 38.83 | 49.76 | 11.41 |                  | N          |

Table C.1 cont'd

| Site | Transect | Quadrat | Date      | Latitude  | Longitude  | Canopy | Herb | Sedge | Stem | Burrow | Elevation | Solar   | Water_dist | CTI   | Sand  | Silt  | Clay  | Burrow ownership | Water trns |
|------|----------|---------|-----------|-----------|------------|--------|------|-------|------|--------|-----------|---------|------------|-------|-------|-------|-------|------------------|------------|
| 7    | 22       | 129     | 4/9/2014  | 34.335356 | -93.541413 | 95     | 94   | 0     | 11   | 0      | 186.75    | 6222.62 | 95.82      | 7.15  | 36.19 | 54.03 | 9.78  |                  | N          |
| 7    | 22       | 130     | 4/9/2014  | 34.335264 | -93.541414 | 99     | 28   | 0     | 1    | 0      | 186.31    | 6223.44 | 85.94      | 7.69  | 36.19 | 54.03 | 9.78  |                  | N          |
| 7    | 22       | 131     | 4/9/2014  | 34.335172 | -93.541415 | 100    | 28   | 0     | 3    | 0      | 185.88    | 6224.29 | 76.14      | 7.94  | 39.14 | 50.59 | 10.27 |                  | N          |
| 7    | 22       | 132     | 4/9/2014  | 34.33508  | -93.541417 | 96     | 12   | 0     | 0    | 0      | 185.37    | 6224.57 | 66.45      | 10.53 | 39.14 | 50.59 | 10.27 |                  | N          |
| 7    | 23       | 133     | 4/9/2014  | 34.33562  | -93.54108  | 7      | 100  | 0     | 24   | 0      | 188.81    | 6217.87 | 108.60     | 6.36  | 34.23 | 50.43 | 15.34 |                  | N          |
| 7    | 23       | 134     | 4/9/2014  | 34.335528 | -93.541081 | 30     | 90   | 1     | 26   | 1      | 188.67    | 6219.66 | 112.51     | 7.73  | 34.23 | 50.43 | 15.34 | <i>F. harpi</i>  | N          |
| 7    | 23       | 135     | 4/9/2014  | 34.335436 | -93.541083 | 67     | 95   | 1     | 13   | 0      | 188.43    | 6222.29 | 102.31     | 6.31  | 32.64 | 47.67 | 19.69 |                  | N          |
| 7    | 23       | 136     | 4/9/2014  | 34.335344 | -93.541084 | 97     | 85   | 1     | 2    | 1      | 188.01    | 6223.87 | 92.11      | 6.83  | 32.64 | 47.67 | 19.69 | <i>F. harpi</i>  | N          |
| 7    | 23       | 137     | 4/9/2014  | 34.335252 | -93.541085 | 96     | 1    | 0     | 0    | 0      | 187.42    | 6223.32 | 81.90      | 7.08  | 27.98 | 51.44 | 20.59 |                  | N          |
| 7    | 23       | 138     | 4/9/2014  | 34.33516  | -93.541086 | 90     | 1    | 0     | 0    | 0      | 186.56    | 6222.22 | 71.70      | 5.75  | 27.98 | 51.44 | 20.59 |                  | N          |
| 8    | 24       | 139     | 4/9/2014  | 34.33228  | -93.54092  | 0      | 90   | 1     | 9    | 0      | 178.19    | 6215.64 | 220.47     | 7.68  | 36.03 | 48.51 | 15.46 |                  | N          |
| 8    | 24       | 140     | 4/9/2014  | 34.332371 | -93.540924 | 0      | 90   | 1     | 22   | 4      | 178.39    | 6216.04 | 210.39     | 12.53 | 36.03 | 48.51 | 15.46 | <i>F. harpi</i>  | N          |
| 8    | 24       | 141     | 4/9/2014  | 34.332461 | -93.540928 | 0      | 85   | 1     | 3    | 4      | 178.61    | 6216.34 | 200.41     | 8.69  | 29.65 | 57.6  | 12.75 | <i>F. harpi</i>  | N          |
| 8    | 24       | 142     | 4/9/2014  | 34.332552 | -93.540932 | 0      | 80   | 1     | 4    | 2      | 178.86    | 6216.77 | 190.32     | 8.49  | 29.65 | 57.6  | 12.75 | <i>F. harpi</i>  | N          |
| 8    | 24       | 143     | 4/9/2014  | 34.332642 | -93.540935 | 0      | 90   | 1     | 6    | 1      | 179.06    | 6216.22 | 180.36     | 8.30  | 29    | 56.65 | 14.35 | <i>F. harpi</i>  | N          |
| 8    | 24       | 144     | 4/9/2014  | 34.332733 | -93.540939 | 0      | 99   | 1     | 32   | 3      | 179.23    | 6216.57 | 170.27     | 7.95  | 29    | 56.65 | 14.35 | <i>F. harpi</i>  | N          |
| 8    | 25       | 145     | 4/9/2014  | 34.33235  | -93.54105  | 0      | 99   | 1     | 11   | 2      | 178.49    | 6215.51 | 212.10     | 12.59 | 27.14 | 47.94 | 24.85 | <i>F. harpi</i>  | N          |
| 8    | 25       | 146     | 4/9/2014  | 34.332441 | -93.541054 | 0      | 80   | 1     | 28   | 4      | 178.66    | 6216.22 | 202.01     | 9.63  | 27.14 | 47.94 | 24.85 | <i>F. harpi</i>  | N          |
| 8    | 25       | 147     | 4/9/2014  | 34.332531 | -93.541058 | 0      | 100  | 1     | 25   | 4      | 178.90    | 6216.49 | 192.02     | 8.53  | 37.1  | 54.46 | 8.44  | <i>F. harpi</i>  | N          |
| 8    | 25       | 148     | 4/9/2014  | 34.332622 | -93.541062 | 0      | 90   | 0     | 33   | 8      | 179.07    | 6215.93 | 181.93     | 8.40  | 37.1  | 54.46 | 8.44  | <i>F. harpi</i>  | N          |
| 8    | 25       | 149     | 4/9/2014  | 34.332712 | -93.541065 | 0      | 95   | 1     | 24   | 2      | 179.25    | 6216.77 | 171.94     | 7.84  | 30.28 | 58.29 | 11.43 | <i>F. harpi</i>  | N          |
| 8    | 25       | 150     | 4/9/2014  | 34.332803 | -93.541069 | 0      | 95   | 0     | 11   | 4      | 179.50    | 6216.47 | 161.85     | 7.64  | 30.28 | 58.29 | 11.43 | <i>F. harpi</i>  | N          |
| 9    | 26       | 151     | 4/10/2014 | 34.34728  | -93.48791  | 0      | 76   | 1     | 11   | 0      | 185.40    | 6220.87 | 143.32     | 6.62  | 27.34 | 54.77 | 17.89 |                  | N          |
| 9    | 26       | 152     | 4/10/2014 | 34.347333 | -93.48782  | 1      | 34   | 1     | 27   | 0      | 185.65    | 6221.29 | 143.99     | 6.76  | 27.34 | 54.77 | 17.89 |                  | N          |
| 9    | 26       | 153     | 4/10/2014 | 34.347386 | -93.487729 | 8      | 64   | 1     | 17   | 0      | 185.54    | 6221.09 | 138.38     | 6.54  | 39.22 | 46.4  | 14.38 |                  | N          |
| 9    | 26       | 154     | 4/10/2014 | 34.347438 | -93.487639 | 1      | 55   | 1     | 6    | 0      | 185.87    | 6220.05 | 133.20     | 9.77  | 39.22 | 46.4  | 14.38 |                  | N          |
| 9    | 26       | 155     | 4/10/2014 | 34.347491 | -93.487549 | 0      | 55   | 1     | 22   | 0      | 185.68    | 6221.11 | 128.58     | 10.37 | 43.38 | 44.77 | 11.85 |                  | N          |



Table C.1 cont'd

| Site | Transect | Quadrat | Date      | Latitude  | Longitude  | Canopy | Herb | Sedge | Stem | Burrow | Elevation | Solar   | Water_dist | CTI   | Sand  | Silt  | Clay  | Burrow ownership | Water trns |
|------|----------|---------|-----------|-----------|------------|--------|------|-------|------|--------|-----------|---------|------------|-------|-------|-------|-------|------------------|------------|
| 9    | 26       | 156     | 4/10/2014 | 34.347544 | -93.487459 | 1      | 3    | 0     | 24   | 0      | 186.14    | 6219.99 | 124.02     | 7.38  | 43.38 | 44.77 | 11.85 |                  | N          |
| 9    | 27       | 157     | 4/10/2014 | 34.346806 | -93.487963 | 8      | 77   | 1     | 27   | 2      | 183.47    | 6218.94 | 99.37      | 7.45  | 30.29 | 45.02 | 24.69 | <i>F. harpi</i>  | N          |
| 9    | 27       | 158     | 4/10/2014 | 34.346859 | -93.487872 | 3      | 97   | 1     | 31   | 0      | 183.79    | 6218.92 | 99.73      | 7.45  | 30.29 | 45.02 | 24.69 |                  | N          |
| 9    | 27       | 159     | 4/10/2014 | 34.346912 | -93.487782 | 1      | 98   | 1     | 27   | 1      | 183.78    | 6218.57 | 101.16     | 10.54 | 36.84 | 46.9  | 16.26 | <i>F. harpi</i>  | N          |
| 9    | 27       | 160     | 4/10/2014 | 34.346965 | -93.487692 | 6      | 81   | 1     | 19   | 7      | 184.09    | 6218.65 | 103.58     | 8.92  | 36.84 | 46.9  | 16.26 | <i>F. harpi</i>  | N          |
| 9    | 27       | 161     | 4/10/2014 | 34.347017 | -93.487601 | 12     | 76   | 0     | 6    | 4      | 184.01    | 6217.83 | 106.39     | 8.62  | 43.79 | 46.01 | 10.2  | <i>F. harpi</i>  | N          |
| 9    | 27       | 162     | 4/10/2014 | 34.34707  | -93.487511 | 13     | 90   | 0     | 21   | 0      | 184.23    | 6218.33 | 106.95     | 8.35  | 43.79 | 46.01 | 10.2  |                  | N          |
| 9    | 28       | 163     | 4/10/2014 | 34.346718 | -93.488097 | 1      | 95   | 1     | 35   | 0      | 183.11    | 6218.19 | 99.21      | 7.23  | 41.21 | 44.65 | 14.14 |                  | N          |
| 9    | 28       | 164     | 4/10/2014 | 34.346665 | -93.488186 | 0      | 90   | 1     | 17   | 0      | 182.97    | 6216.82 | 100.17     | 7.40  | 41.21 | 44.65 | 14.14 |                  | N          |
| 9    | 28       | 165     | 4/10/2014 | 34.346612 | -93.488275 | 0      | 95   | 0     | 20   | 0      | 183.22    | 6216.90 | 97.96      | 9.20  | 40.76 | 47.5  | 11.73 |                  | N          |
| 9    | 28       | 166     | 4/10/2014 | 34.346559 | -93.488363 | 0      | 95   | 1     | 29   | 0      | 183.09    | 6216.91 | 96.71      | 9.20  | 40.76 | 47.5  | 11.73 |                  | N          |
| 9    | 28       | 167     | 4/10/2014 | 34.346506 | -93.488452 | 8      | 90   | 1     | 19   | 1      | 183.35    | 6216.91 | 96.23      | 8.16  | 29.19 | 45.57 | 25.24 | <i>F. harpi</i>  | N          |
| 9    | 28       | 168     | 4/10/2014 | 34.346453 | -93.488541 | 32     | 74   | 0     | 25   | 0      | 183.20    | 6217.05 | 96.74      | 7.94  | 29.19 | 45.57 | 25.24 |                  | N          |
| 10   | 29       | 169     | 4/10/2014 | 34.35593  | -93.47363  | 0      | 79   | 1     | 40   | 0      | 200.31    | 6227.26 | 119.84     | 8.12  | 18.86 | 46.51 | 34.57 |                  | Y          |
| 10   | 29       | 170     | 4/10/2014 | 34.355975 | -93.473534 | 0      | 76   | 1     | 45   | 2      | 200.56    | 6223.26 | 117.98     | 8.22  | 18.86 | 46.51 | 34.57 | <i>F. harpi</i>  | Y          |
| 10   | 29       | 171     | 4/10/2014 | 34.35602  | -93.473437 | 0      | 72   | 1     | 51   | 1      | 200.64    | 6221.10 | 116.93     | 7.81  | 40.82 | 44.82 | 14.36 | <i>F. harpi</i>  | Y          |
| 10   | 29       | 172     | 4/10/2014 | 34.356065 | -93.473341 | 26     | 75   | 1     | 38   | 0      | 200.70    | 6217.43 | 116.80     | 8.42  | 40.82 | 44.82 | 14.36 |                  | Y          |
| 10   | 29       | 173     | 4/10/2014 | 34.35611  | -93.473245 | 0      | 15   | 1     | 3    | 1      | 200.79    | 6214.29 | 117.56     | 8.58  | 39.37 | 40.85 | 19.78 | <i>F. harpi</i>  | Y          |
| 10   | 29       | 174     | 4/10/2014 | 34.356155 | -93.473149 | 0      | 83   | 1     | 15   | 1      | 200.76    | 6216.73 | 119.01     | 7.22  | 39.37 | 40.85 | 19.78 | <i>F. harpi</i>  | Y          |
| 10   | 30       | 175     | 4/10/2014 | 34.35617  | -93.47311  | 0      | 79   | 1     | 47   | 0      | 200.84    | 6213.47 | 119.44     | 8.73  | 50.82 | 37.56 | 11.56 |                  | Y          |
| 10   | 30       | 176     | 4/10/2014 | 34.356215 | -93.473014 | 0      | 53   | 1     | 27   | 4      | 200.76    | 6218.14 | 121.91     | 10.68 | 50.82 | 37.56 | 11.56 | <i>F. harpi</i>  | Y          |
| 10   | 30       | 177     | 4/10/2014 | 34.35626  | -93.472917 | 0      | 65   | 1     | 20   | 6      | 200.90    | 6217.26 | 125.14     | 10.30 | 44.15 | 47.95 | 7.9   | <i>F. harpi</i>  | Y          |
| 10   | 30       | 178     | 4/10/2014 | 34.356305 | -93.472821 | 0      | 53   | 0     | 55   | 1      | 201.17    | 6222.77 | 129.09     | 7.07  | 44.15 | 47.95 | 7.9   | <i>F. harpi</i>  | Y          |
| 10   | 30       | 179     | 4/10/2014 | 34.35635  | -93.472725 | 0      | 80   | 1     | 45   | 1      | 201.43    | 6219.79 | 129.38     | 6.88  | 36.31 | 43.63 | 20.05 | <i>F. harpi</i>  | Y          |
| 10   | 30       | 180     | 4/10/2014 | 34.356395 | -93.472629 | 0      | 74   | 1     | 46   | 4      | 201.43    | 6207.14 | 122.90     | 11.91 | 36.31 | 43.63 | 20.05 | <i>F. harpi</i>  | Y          |
| 10   | 31       | 181     | 4/10/2014 | 34.35578  | -93.47449  | 0      | 20   | 1     | 38   | 0      | 199.55    | 6231.24 | 146.61     | 7.34  | 36.57 | 46.45 | 16.98 |                  | Y          |
| 10   | 31       | 182     | 4/10/2014 | 34.355728 | -93.474581 | 0      | 80   | 1     | 19   | 0      | 199.40    | 6230.16 | 140.66     | 7.29  | 36.57 | 46.45 | 16.98 |                  | Y          |

Table C.1 cont'd

| Site | Transect | Quadrat | Date      | Latitude  | Longitude  | Canopy | Herb | Sedge | Stem | Burrow | Elevation | Solar   | Water_dist | CTI   | Sand  | Silt  | Clay  | Burrow ownership | Water_trns |
|------|----------|---------|-----------|-----------|------------|--------|------|-------|------|--------|-----------|---------|------------|-------|-------|-------|-------|------------------|------------|
| 10   | 31       | 183     | 4/10/2014 | 34.355675 | -93.474671 | 0      | 69   | 1     | 13   | 0      | 199.64    | 6230.65 | 135.33     | 7.69  | 41.1  | 47.45 | 11.45 |                  | Y          |
| 10   | 31       | 184     | 4/10/2014 | 34.355623 | -93.474762 | 0      | 95   | 1     | 66   | 0      | 199.53    | 6230.52 | 130.45     | 8.01  | 41.1  | 47.45 | 11.45 |                  | Y          |
| 10   | 31       | 185     | 4/10/2014 | 34.355571 | -93.474852 | 0      | 90   | 0     | 30   | 1      | 199.77    | 6229.81 | 126.28     | 7.68  | 27.28 | 61.34 | 11.38 | <i>F. harpi</i>  | Y          |
| 10   | 31       | 186     | 4/10/2014 | 34.355519 | -93.474943 | 0      | 85   | 1     | 12   | 1      | 199.78    | 6232.06 | 122.72     | 6.54  | 27.28 | 61.34 | 11.38 | <i>F. harpi</i>  | Y          |
| 11   | 32       | 187     | 4/10/2014 | 34.373446 | -93.404412 | 97     | 90   | 0     | 31   | 0      | 186.94    | 6220.37 | 83.71      | 10.22 | 41.93 | 47.71 | 10.37 |                  | N          |
| 11   | 32       | 188     | 4/10/2014 | 34.373394 | -93.404502 | 26     | 89   | 1     | 20   | 0      | 186.85    | 6219.65 | 85.36      | 6.47  | 41.93 | 47.71 | 10.37 |                  | N          |
| 11   | 32       | 189     | 4/10/2014 | 34.373341 | -93.404592 | 97     | 40   | 1     | 3    | 0      | 187.42    | 6206.59 | 88.26      | 5.57  | 48.16 | 37.4  | 14.44 |                  | N          |
| 11   | 32       | 190     | 4/10/2014 | 34.373289 | -93.404683 | 24     | 20   | 1     | 7    | 0      | 188.16    | 6201.65 | 92.06      | 5.89  | 48.16 | 37.4  | 14.44 |                  | N          |
| 11   | 32       | 191     | 4/10/2014 | 34.373236 | -93.404773 | 97     | 55   | 1     | 15   | 0      | 187.95    | 6208.07 | 96.90      | 6.28  | 41.54 | 48.38 | 10.08 |                  | N          |
| 11   | 32       | 192     | 4/10/2014 | 34.373183 | -93.404863 | 32     | 3    | 0     | 0    | 0      | 188.66    | 6220.47 | 102.52     | 6.72  | 41.54 | 48.38 | 10.08 |                  | N          |
| 11   | 33       | 193     | 4/10/2014 | 34.373349 | -93.404349 | 95     | 73   | 1     | 12   | 0      | 186.62    | 6222.02 | 95.92      | 7.44  | 52.2  | 42.68 | 5.1   |                  | N          |
| 11   | 33       | 194     | 4/10/2014 | 34.373296 | -93.404439 | 92     | 100  | 1     | 38   | 0      | 186.31    | 6222.05 | 97.62      | 9.97  | 52.2  | 42.68 | 5.1   |                  | N          |
| 11   | 33       | 195     | 4/10/2014 | 34.373244 | -93.404529 | 84     | 45   | 1     | 12   | 0      | 186.34    | 6220.83 | 100.21     | 8.15  | 42.73 | 44.41 | 12.86 |                  | N          |
| 11   | 33       | 196     | 4/10/2014 | 34.373191 | -93.404619 | 97     | 3    | 1     | 2    | 0      | 186.10    | 6212.33 | 103.83     | 6.77  | 42.73 | 44.41 | 12.86 |                  | N          |
| 11   | 33       | 197     | 4/10/2014 | 34.373139 | -93.404709 | 99     | 20   | 0     | 0    | 0      | 186.60    | 6188.38 | 108.18     | 8.15  | 31.94 | 50.28 | 17.77 |                  | N          |
| 11   | 33       | 198     | 4/10/2014 | 34.373086 | -93.404799 | 95     | 35   | 0     | 0    | 0      | 187.60    | 6195.96 | 113.37     | 8.26  | 31.94 | 50.28 | 17.77 |                  | N          |
| 11   | 34       | 199     | 4/10/2014 | 34.37373  | -93.40442  | 13     | 75   | 1     | 3    | 0      | 187.70    | 6223.65 | 57.11      | 11.41 | 32.63 | 55.63 | 11.74 |                  | N          |
| 11   | 34       | 200     | 4/10/2014 | 34.373683 | -93.404513 | 58     | 100  | 1     | 68   | 0      | 187.48    | 6221.14 | 56.39      | 11.31 | 32.63 | 55.63 | 11.74 |                  | N          |
| 11   | 34       | 201     | 4/10/2014 | 34.373635 | -93.404607 | 100    | 15   | 1     | 0    | 0      | 187.64    | 6219.12 | 56.98      | 9.42  | 39.32 | 46.19 | 14.49 |                  | N          |
| 11   | 34       | 202     | 4/10/2014 | 34.373588 | -93.4047   | 100    | 0    | 0     | 0    | 0      | 187.90    | 6208.41 | 59.25      | 9.88  | 39.32 | 46.19 | 14.49 |                  | N          |
| 11   | 34       | 203     | 4/10/2014 | 34.37354  | -93.404793 | 51     | 40   | 0     | 12   | 0      | 188.15    | 6204.61 | 63.15      | 6.82  | 37.41 | 52.27 | 10.32 |                  | N          |
| 11   | 34       | 204     | 4/10/2014 | 34.373493 | -93.404886 | 0      | 95   | 0     | 68   | 0      | 188.76    | 6198.55 | 68.21      | 8.72  | 37.41 | 52.27 | 10.32 |                  | N          |
| 11   | 35       | 205     | 4/10/2014 | 34.374093 | -93.404119 | 0      | 99   | 1     | 53   | 5      | 188.30    | 6223.63 | 40.05      | 11.24 | 31.75 | 50.31 | 17.94 | <i>F. harpi</i>  | N          |
| 11   | 35       | 206     | 4/10/2014 | 34.374041 | -93.404209 | 0      | 90   | 1     | 22   | 6      | 188.16    | 6224.43 | 40.24      | 8.58  | 31.75 | 50.31 | 17.94 | <i>F. harpi</i>  | N          |
| 11   | 35       | 207     | 4/10/2014 | 34.373988 | -93.4043   | 0      | 81   | 1     | 61   | 4      | 188.60    | 6225.94 | 42.37      | 9.32  | 51.91 | 33.3  | 14.79 | <i>F. harpi</i>  | N          |
| 11   | 35       | 208     | 4/10/2014 | 34.373935 | -93.40439  | 0      | 90   | 1     | 80   | 3      | 189.14    | 6226.69 | 46.59      | 9.16  | 51.91 | 33.3  | 14.79 | <i>F. harpi</i>  | N          |
| 11   | 35       | 209     | 4/10/2014 | 34.373883 | -93.40448  | 0      | 100  | 1     | 26   | 2      | 189.11    | 6226.79 | 52.29      | 7.19  | 14.74 | 55.11 | 30.15 | <i>F. harpi</i>  | N          |

**Table C.1 cont'd**

| Site | Transect | Quadrat | Date      | Latitude | Longitude | Canopy | Herb | Sedge | Stem | Burrow | Elevation | Solar   | Water_dist | CTI   | Sand  | Silt  | Clay  | Burrow ownership | Water_trns |
|------|----------|---------|-----------|----------|-----------|--------|------|-------|------|--------|-----------|---------|------------|-------|-------|-------|-------|------------------|------------|
| 11   | 35       | 210     | 4/10/2014 | 34.37383 | -93.40457 | 0      | 100  | 0     | 33   | 1      | 189.70    | 6227.28 | 58.91      | 6.77  | 14.74 | 55.11 | 30.15 | <i>F. harpi</i>  | N          |
| 3    | 3        | 432     | 3/29/2015 | 34.25165 | -93.6528  | 28     | 55   | 0     | 22   | 0      | 187.99    | 6003.80 | 179.58     | 6.60  | 23.25 | 58.88 | 17.87 |                  |            |
| 3    | 3        | 433     | 3/29/2015 | 34.25165 | -93.6528  | 76     | 80   | 0     | 12   | 0      | 187.50    | 6005.23 | 170.75     | 8.66  | 23.25 | 58.88 | 17.87 |                  |            |
| 3    | 3        | 434     | 3/29/2015 | 34.25165 | -93.6528  | 11     | 90   | 0     | 9    | 0      | 187.27    | 6008.10 | 161.98     | 9.07  | 23.25 | 58.88 | 17.87 |                  |            |
| 3    | 3        | 435     | 3/29/2015 | 34.25165 | -93.6528  | 11     | 90   | 0     | 21   | 0      | 187.05    | 6008.75 | 153.36     | 13.52 | 23.25 | 58.88 | 17.87 |                  |            |
| 3    | 3        | 436     | 3/29/2015 | 34.25165 | -93.6528  | 31     | 55   | 0     | 37   | 0      | 186.94    | 6009.33 | 145.00     | 6.89  | 23.25 | 58.88 | 17.87 |                  |            |
| 3    | 3        | 437     | 3/29/2015 | 34.25165 | -93.6528  | 40     | 85   | 0     | 42   | 0      | 186.78    | 6009.73 | 136.83     | 8.99  | 23.25 | 58.88 | 17.87 |                  |            |
| 6    | 6        | 438     | 3/26/2015 | 34.37954 | -93.29277 | 0      | 80   | 0     | 17   | 0      | 183.82    | 6002.75 | 131.36     | 10.56 | 17.95 | 62.35 | 19.70 |                  |            |
| 6    | 6        | 439     | 3/26/2015 | 34.37954 | -93.29277 | 1      | 200  | 1     | 20   | 0      | 183.90    | 6002.51 | 136.38     | 8.33  | 17.95 | 62.35 | 19.70 |                  |            |
| 6    | 6        | 440     | 3/26/2015 | 34.37954 | -93.29277 | 5      | 98   | 0     | 27   | 0      | 183.88    | 6001.79 | 141.90     | 8.49  | 17.95 | 62.35 | 19.70 |                  |            |
| 6    | 6        | 441     | 3/26/2015 | 34.37954 | -93.29277 | 2      | 95   | 0     | 12   | 0      | 183.83    | 6000.97 | 147.80     | 8.42  | 17.95 | 62.35 | 19.70 |                  |            |
| 6    | 6        | 442     | 3/26/2015 | 34.37954 | -93.29277 | 0      | 100  | 0     | 58   | 0      | 183.82    | 6001.96 | 141.19     | 8.82  | 17.95 | 62.35 | 19.70 |                  |            |
| 6    | 6        | 443     | 3/26/2015 | 34.37954 | -93.29277 | 0      | 100  | 0     | 62   | 0      | 183.71    | 6000.30 | 133.67     | 7.14  | 17.95 | 62.35 | 19.70 |                  |            |
| 8    | 8        | 444     | 3/26/2015 | 34.32465 | -93.173   | 0      | 95   | 0     | 39   | 0      | 185.93    | 6015.41 | 200.60     | 8.03  | 23.63 | 62.74 | 13.63 |                  |            |
| 8    | 8        | 445     | 3/26/2015 | 34.32465 | -93.173   | 0      | 90   | 0     | 58   | 0      | 186.63    | 6016.66 | 195.39     | 8.01  | 23.63 | 62.74 | 13.63 |                  |            |
| 8    | 8        | 446     | 3/26/2015 | 34.32465 | -93.173   | 0      | 70   | 0     | 46   | 0      | 187.33    | 6017.00 | 190.63     | 7.87  | 23.63 | 62.74 | 13.63 |                  |            |
| 8    | 8        | 447     | 3/26/2015 | 34.32465 | -93.173   | 0      | 40   | 0     | 7    | 0      | 188.00    | 6017.15 | 186.21     | 7.72  | 23.63 | 62.74 | 13.63 |                  |            |
| 8    | 8        | 448     | 3/26/2015 | 34.32465 | -93.173   | 0      | 55   | 0     | 46   | 0      | 188.64    | 6015.19 | 182.31     | 7.21  | 23.63 | 62.74 | 13.63 |                  |            |
| 8    | 8        | 449     | 3/26/2015 | 34.32465 | -93.173   | 0      | 28   | 0     | 39   | 0      | 189.77    | 6018.45 | 178.75     | 6.99  | 23.63 | 62.74 | 13.63 |                  |            |
| 9    | 9        | 450     | 3/23/2015 | 34.7494  | -92.82497 | 0      | 35   | 0     | 12   | 0      | 193.82    | 6012.11 | 154.52     | 9.11  | 18.28 | 61.07 | 20.65 |                  |            |
| 9    | 9        | 451     | 3/23/2015 | 34.7494  | -92.82497 | 0      | 15   | 1     | 5    | 0      | 194.01    | 6012.26 | 164.36     | 8.93  | 18.28 | 61.07 | 20.65 |                  |            |
| 9    | 9        | 452     | 3/23/2015 | 34.7494  | -92.82497 | 0      | 85   | 1     | 18   | 0      | 194.03    | 6011.79 | 174.29     | 11.22 | 18.28 | 61.07 | 20.65 |                  |            |
| 9    | 9        | 453     | 3/23/2015 | 34.7494  | -92.82497 | 0      | 85   | 1     | 13   | 0      | 193.99    | 6011.46 | 184.24     | 12.06 | 18.28 | 61.07 | 20.65 |                  |            |
| 9    | 9        | 454     | 3/23/2015 | 34.7494  | -92.82497 | 0      | 90   | 1     | 20   | 0      | 194.06    | 6010.29 | 194.11     | 9.92  | 18.28 | 61.07 | 20.65 |                  |            |
| 9    | 9        | 455     | 3/23/2015 | 34.7494  | -92.82497 | 0      | 2    | 0     | 0    | 0      | 194.16    | 6009.09 | 204.02     | 9.59  | 18.28 | 61.07 | 20.65 |                  |            |
| 10   | 10       | 456     | 3/31/2015 | 34.56465 | -93.63181 | 0      | 65   | 0     | 13   | 0      | 194.15    | 6009.33 | 129.30     | 10.94 | 11.81 | 76.57 | 11.62 |                  |            |
| 10   | 10       | 457     | 3/31/2015 | 34.56465 | -93.63181 | 0      | 80   | 1     | 22   | 0      | 194.15    | 6008.07 | 137.54     | 10.71 | 11.81 | 76.57 | 11.62 |                  |            |

Table C.1 cont'd

| Site | Transect | Quadrat | Date      | Latitude | Longitude | Canopy | Herb | Sedge | Stem | Burrow | Elevation | Solar   | Water_dist | CTI   | Sand  | Silt  | Clay  | Burrow ownership | Water_trns |
|------|----------|---------|-----------|----------|-----------|--------|------|-------|------|--------|-----------|---------|------------|-------|-------|-------|-------|------------------|------------|
| 10   | 10       | 458     | 3/31/2015 | 34.56465 | -93.63181 | 0      | 35   | 1     | 36   | 0      | 194.31    | 6007.26 | 145.87     | 9.96  | 11.81 | 76.57 | 11.62 |                  |            |
| 10   | 10       | 459     | 3/31/2015 | 34.56465 | -93.63181 | 0      | 65   | 1     | 37   | 0      | 194.33    | 6008.90 | 154.11     | 7.66  | 11.81 | 76.57 | 11.62 |                  |            |
| 10   | 10       | 460     | 3/31/2015 | 34.56465 | -93.63181 | 0      | 70   | 1     | 24   | 0      | 194.33    | 6008.38 | 162.44     | 10.81 | 11.81 | 76.57 | 11.62 |                  |            |
| 10   | 10       | 461     | 3/31/2015 | 34.56465 | -93.63181 | 0      | 75   | 1     | 27   | 0      | 194.37    | 6007.62 | 170.41     | 7.75  | 11.81 | 76.57 | 11.62 |                  |            |
| 12   | 12       | 462     | 3/25/2015 | 34.6647  | -93.26058 | 0      | 100  | 0     | 49   | 1      | 192.06    | 6009.98 | 162.73     | 13.40 | 21.59 | 60.33 | 18.08 |                  |            |
| 12   | 12       | 463     | 3/25/2015 | 34.6647  | -93.26058 | 0      | 95   | 0     | 36   | 0      | 192.03    | 6011.62 | 172.32     | 13.60 | 21.59 | 60.33 | 18.08 |                  |            |
| 12   | 12       | 464     | 3/25/2015 | 34.6647  | -93.26058 | 12     | 96   | 0     | 48   | 0      | 192.04    | 6011.15 | 182.03     | 7.08  | 21.59 | 60.33 | 18.08 |                  |            |
| 12   | 12       | 465     | 3/25/2015 | 34.6647  | -93.26058 | 20     | 90   | 0     | 12   | 0      | 192.04    | 6010.90 | 191.76     | 7.08  | 21.59 | 60.33 | 18.08 |                  |            |
| 12   | 12       | 466     | 3/25/2015 | 34.6647  | -93.26058 | 0      | 60   | 1     | 0    | 0      | 191.52    | 6013.75 | 201.45     | 7.12  | 21.59 | 60.33 | 18.08 |                  |            |
| 12   | 12       | 467     | 3/25/2015 | 34.6647  | -93.26058 | 8      | 55   | 1     | 22   | 0      | 191.60    | 6013.10 | 211.25     | 7.55  | 21.59 | 60.33 | 18.08 |                  |            |
| 13   | 13       | 468     | 3/29/2015 | 34.2505  | -93.42452 | 0      | 80   | 0     | 68   | 0      | 174.75    | 6004.43 | 189.01     | 6.15  | 38.93 | 50.66 | 10.41 |                  |            |
| 13   | 13       | 469     | 3/29/2015 | 34.2505  | -93.42452 | 0      | 100  | 0     | 94   | 0      | 174.43    | 6001.88 | 198.76     | 6.69  | 38.93 | 50.66 | 10.41 |                  |            |
| 13   | 13       | 470     | 3/29/2015 | 34.2505  | -93.42452 | 0      | 95   | 0     | 78   | 0      | 174.08    | 6000.30 | 208.51     | 7.13  | 38.93 | 50.66 | 10.41 |                  |            |
| 13   | 13       | 471     | 3/29/2015 | 34.2505  | -93.42452 | 0      | 90   | 0     | 22   | 0      | 173.67    | 5996.38 | 218.27     | 7.61  | 38.93 | 50.66 | 10.41 |                  |            |
| 13   | 13       | 472     | 3/29/2015 | 34.2505  | -93.42452 | 0      | 80   | 0     | 27   | 0      | 173.18    | 6001.12 | 228.02     | 11.69 | 38.93 | 50.66 | 10.41 |                  |            |
| 13   | 13       | 473     | 3/29/2015 | 34.2505  | -93.42452 | 27     | 85   | 0     | 32   | 0      | 173.18    | 6002.90 | 237.77     | 8.09  | 38.93 | 50.66 | 10.41 |                  |            |
| 14   | 14       | 474     | 3/28/2015 | 34.32955 | -93.53259 | 0      | 20   | 1     | 6    | 16     | 177.71    | 5995.32 | 245.37     | 8.95  | 31.68 | 53.11 | 15.21 | <i>F. harpi</i>  |            |
| 14   | 14       | 475     | 3/28/2015 | 34.32955 | -93.53259 | 0      | 65   | 1     | 26   | 7      | 177.81    | 5995.34 | 237.11     | 7.77  | 31.68 | 53.11 | 15.21 | <i>F. harpi</i>  |            |
| 14   | 14       | 476     | 3/28/2015 | 34.32955 | -93.53259 | 0      | 30   | 1     | 21   | 5      | 177.79    | 5995.49 | 228.99     | 7.55  | 31.68 | 53.11 | 15.21 | <i>F. harpi</i>  |            |
| 14   | 14       | 477     | 3/28/2015 | 34.32955 | -93.53259 | 0      | 65   | 1     | 12   | 4      | 177.79    | 5995.49 | 220.93     | 7.55  | 31.68 | 53.11 | 15.21 | <i>F. harpi</i>  |            |
| 14   | 14       | 478     | 3/28/2015 | 34.32955 | -93.53259 | 0      | 60   | 1     | 26   | 4      | 177.63    | 5997.67 | 212.93     | 7.53  | 31.68 | 53.11 | 15.21 | <i>F. harpi</i>  |            |
| 14   | 14       | 479     | 3/28/2015 | 34.32955 | -93.53259 | 0      | 80   | 0     | 38   | 0      | 177.49    | 5998.54 | 205.01     | 9.73  | 31.68 | 53.11 | 15.21 |                  |            |
| 16   | 16       | 480     | 3/28/2015 | 34.44565 | -93.34284 | 0      | 90   | 1     | 32   | 2      | 170.72    | 5994.74 | 131.09     | 10.31 | 24.82 | 56.49 | 18.69 | <i>F. harpi</i>  |            |
| 16   | 16       | 481     | 3/28/2015 | 34.44565 | -93.34284 | 0      | 55   | 1     | 25   | 1      | 170.72    | 5994.71 | 136.74     | 15.02 | 24.82 | 56.49 | 18.69 | <i>F. harpi</i>  |            |
| 16   | 16       | 482     | 3/28/2015 | 34.44565 | -93.34284 | 0      | 85   | 1     | 17   | 1      | 170.72    | 5996.95 | 140.30     | 8.37  | 24.82 | 56.49 | 18.69 | <i>F. harpi</i>  |            |
| 16   | 16       | 483     | 3/28/2015 | 34.44565 | -93.34284 | 0      | 60   | 1     | 37   | 0      | 170.56    | 6000.24 | 144.46     | 9.51  | 24.82 | 56.49 | 18.69 |                  |            |
| 16   | 16       | 484     | 3/28/2015 | 34.44565 | -93.34284 | 0      | 85   | 1     | 42   | 0      | 170.32    | 6001.65 | 142.66     | 9.25  | 24.82 | 56.49 | 18.69 |                  |            |

Table C.1 cont'd

| Site | Transect | Quadrat | Date      | Latitude | Longitude | Canopy | Herb | Sedge | Stem | Burrow | Elevation | Solar   | Water dist | CTI   | Sand  | Silt  | Clay  | Burrow ownership | Water trns |
|------|----------|---------|-----------|----------|-----------|--------|------|-------|------|--------|-----------|---------|------------|-------|-------|-------|-------|------------------|------------|
| 16   | 16       | 485     | 3/28/2015 | 34.44565 | -93.34284 | 0      | 55   | 0     | 42   | 0      | 170.01    | 6000.81 | 132.58     | 9.71  | 24.82 | 56.49 | 18.69 |                  |            |
| 18   | 18       | 486     | 3/29/2015 | 34.32352 | -93.4558  | 0      | 60   | 0     | 21   | 7      | 188.13    | 6011.20 | 231.83     | 8.65  | 41.95 | 50.37 | 7.68  | <i>F. harpi</i>  |            |
| 18   | 18       | 487     | 3/29/2015 | 34.32352 | -93.4558  | 0      | 55   | 1     | 16   | 5      | 187.92    | 6010.71 | 237.99     | 9.00  | 41.95 | 50.37 | 7.68  | <i>F. harpi</i>  |            |
| 18   | 18       | 488     | 3/29/2015 | 34.32352 | -93.4558  | 0      | 35   | 1     | 27   | 4      | 187.85    | 6009.94 | 244.46     | 9.20  | 41.95 | 50.37 | 7.68  | <i>F. harpi</i>  |            |
| 18   | 18       | 489     | 3/29/2015 | 34.32352 | -93.4558  | 0      | 55   | 1     | 23   | 4      | 187.65    | 6009.79 | 250.89     | 9.98  | 41.95 | 50.37 | 7.68  | <i>F. harpi</i>  |            |
| 18   | 18       | 490     | 3/29/2015 | 34.32352 | -93.4558  | 0      | 35   | 1     | 17   | 1      | 187.55    | 6007.77 | 257.45     | 9.30  | 41.95 | 50.37 | 7.68  | <i>F. harpi</i>  |            |
| 18   | 18       | 491     | 3/29/2015 | 34.32352 | -93.4558  | 0      | 45   | 1     | 12   | 1      | 187.49    | 6005.81 | 264.22     | 12.31 | 41.95 | 50.37 | 7.68  | <i>F. harpi</i>  |            |
| 24   | 24       | 492     | 3/28/2015 | 34.27573 | -93.59502 | 8      | 100  | 0     | 64   | 0      | 190.22    | 6009.58 | 105.59     | 9.46  | 38.60 | 48.15 | 13.25 |                  |            |
| 24   | 24       | 493     | 3/28/2015 | 34.27573 | -93.59502 | 80     | 25   | 0     | 7    | 0      | 190.23    | 6009.88 | 109.56     | 7.97  | 38.60 | 48.15 | 13.25 |                  |            |
| 24   | 24       | 494     | 3/28/2015 | 34.27573 | -93.59502 | 50     | 15   | 0     | 0    | 0      | 190.03    | 6010.27 | 113.91     | 7.91  | 38.60 | 48.15 | 13.25 |                  |            |
| 24   | 24       | 495     | 3/28/2015 | 34.27573 | -93.59502 | 84     | 65   | 0     | 3    | 0      | 189.95    | 6010.44 | 118.97     | 9.23  | 38.60 | 48.15 | 13.25 |                  |            |
| 24   | 24       | 496     | 3/28/2015 | 34.27573 | -93.59502 | 90     | 65   | 0     | 22   | 0      | 189.91    | 6011.05 | 124.60     | 7.78  | 38.60 | 48.15 | 13.25 |                  |            |
| 24   | 24       | 497     | 3/28/2015 | 34.27573 | -93.59502 | 8      | 70   | 0     | 19   | 0      | 189.29    | 6010.37 | 130.77     | 9.79  | 38.60 | 48.15 | 13.25 |                  |            |
| 25   | 25       | 498     | 4/1/2015  | 34.13671 | -93.94329 | 2      | 78   | 1     | 37   | 5      | 180.93    | 6003.87 | 408.06     | 10.68 | 39.95 | 54.66 | 5.38  |                  |            |
| 25   | 25       | 499     | 4/1/2015  | 34.13671 | -93.94329 | 3      | 85   | 1     | 22   | 2      | 181.13    | 6005.99 | 410.18     | 6.96  | 39.95 | 54.66 | 5.38  |                  |            |
| 25   | 25       | 500     | 4/1/2015  | 34.13671 | -93.94329 | 2      | 65   | 1     | 27   | 1      | 181.53    | 6005.03 | 412.53     | 7.13  | 39.95 | 54.66 | 5.38  |                  |            |
| 25   | 25       | 501     | 4/1/2015  | 34.13671 | -93.94329 | 4      | 85   | 1     | 41   | 1      | 181.56    | 6005.15 | 415.10     | 11.66 | 39.95 | 54.66 | 5.38  |                  |            |
| 25   | 25       | 502     | 4/1/2015  | 34.13671 | -93.94329 | 1      | 77   | 1     | 32   | 0      | 181.62    | 6005.86 | 417.81     | 9.78  | 39.95 | 54.66 | 5.38  |                  |            |
| 25   | 25       | 503     | 4/1/2015  | 34.13671 | -93.94329 | 0      | 45   | 1     | 13   | 0      | 181.70    | 6006.36 | 420.84     | 9.17  | 39.95 | 54.66 | 5.38  |                  |            |
| 27   | 27       | 504     | 3/29/2015 | 34.39679 | -93.6251  | 0      | 90   | 0     | 27   | 0      | 185.00    | 5992.95 | 261.89     | 8.83  | 20.61 | 55.36 | 24.03 |                  |            |
| 27   | 27       | 505     | 3/29/2015 | 34.39679 | -93.6251  | 0      | 70   | 1     | 12   | 0      | 184.90    | 5992.64 | 251.89     | 9.18  | 20.61 | 55.36 | 24.03 |                  |            |
| 27   | 27       | 506     | 3/29/2015 | 34.39679 | -93.6251  | 0      | 80   | 1     | 32   | 0      | 184.75    | 5992.00 | 241.96     | 9.20  | 20.61 | 55.36 | 24.03 |                  |            |
| 27   | 27       | 507     | 3/29/2015 | 34.39679 | -93.6251  | 0      | 90   | 1     | 47   | 0      | 184.59    | 5990.83 | 231.96     | 8.90  | 20.61 | 55.36 | 24.03 |                  |            |
| 27   | 27       | 508     | 3/29/2015 | 34.39679 | -93.6251  | 0      | 80   | 1     | 33   | 0      | 184.26    | 5989.71 | 222.04     | 8.82  | 20.61 | 55.36 | 24.03 |                  |            |
| 27   | 27       | 509     | 3/29/2015 | 34.39679 | -93.6251  | 0      | 80   | 1     | 52   | 0      | 183.97    | 5991.00 | 212.05     | 9.40  | 20.61 | 55.36 | 24.03 |                  |            |
| 29   | 29       | 510     | 3/28/2015 | 34.3375  | -93.49864 | 0      | 100  | 0     | 84   | 0      | 180.04    | 5999.59 | 48.91      | 7.94  | 41.95 | 50.37 | 7.68  |                  |            |
| 29   | 29       | 511     | 3/28/2015 | 34.3375  | -93.49864 | 0      | 100  | 0     | 114  | 0      | 179.79    | 5998.09 | 47.16      | 8.17  | 41.95 | 50.37 | 7.68  |                  |            |

**Table C.1 cont'd**

| Site | Transect | Quadrat | Date      | Latitude | Longitude | Canopy | Herb | Sedge | Stem | Burrow | Elevation | Solar   | Water dist | CTI   | Sand  | Silt  | Clay  | Burrow ownership | Water trns |
|------|----------|---------|-----------|----------|-----------|--------|------|-------|------|--------|-----------|---------|------------|-------|-------|-------|-------|------------------|------------|
| 29   | 29       | 512     | 3/28/2015 | 34.3375  | -93.49864 | 0      | 99   | 0     | 100  | 0      | 179.55    | 5997.61 | 45.79      | 8.00  | 41.95 | 50.37 | 7.68  |                  |            |
| 29   | 29       | 513     | 3/28/2015 | 34.3375  | -93.49864 | 0      | 100  | 0     | 106  | 0      | 179.21    | 5998.48 | 44.55      | 8.12  | 41.95 | 50.37 | 7.68  |                  |            |
| 29   | 29       | 514     | 3/28/2015 | 34.3375  | -93.49864 | 0      | 100  | 0     | 120  | 0      | 178.79    | 6002.26 | 44.70      | 11.84 | 41.95 | 50.37 | 7.68  |                  |            |
| 29   | 29       | 515     | 3/28/2015 | 34.3375  | -93.49864 | 0      | 100  | 0     | 99   | 0      | 178.72    | 6006.06 | 45.48      | 6.97  | 41.95 | 50.37 | 7.68  |                  |            |
| 30   | 30       | 516     | 3/30/2015 | 34.80357 | -93.9707  | 0      | 90   | 1     | 38   | 0      | 189.86    | 6005.88 | 132.03     | 8.28  | 31.03 | 58.33 | 10.64 |                  |            |
| 30   | 30       | 517     | 3/30/2015 | 34.80357 | -93.9707  | 0      | 85   | 0     | 32   | 0      | 189.92    | 6005.81 | 140.26     | 8.68  | 31.03 | 58.33 | 10.64 |                  |            |
| 30   | 30       | 518     | 3/30/2015 | 34.80357 | -93.9707  | 0      | 85   | 0     | 25   | 0      | 189.99    | 6006.18 | 147.66     | 9.13  | 31.03 | 58.33 | 10.64 |                  |            |
| 30   | 30       | 519     | 3/30/2015 | 34.80357 | -93.9707  | 0      | 70   | 0     | 35   | 0      | 189.99    | 6006.92 | 154.95     | 8.93  | 31.03 | 58.33 | 10.64 |                  |            |
| 30   | 30       | 520     | 3/30/2015 | 34.80357 | -93.9707  | 0      | 80   | 0     | 7    | 0      | 189.99    | 6007.23 | 160.65     | 8.72  | 31.03 | 58.33 | 10.64 |                  |            |
| 30   | 30       | 521     | 3/30/2015 | 34.80357 | -93.9707  | 0      | 45   | 0     | 0    | 0      | 189.99    | 6007.22 | 166.64     | 8.58  | 31.03 | 58.33 | 10.64 |                  |            |
| 32   | 32       | 522     | 3/26/2015 | 34.32851 | -93.07111 | 0      | 90   | 1     | 47   | 7      | 178.30    | 6004.16 | 36.17      | 8.36  | 37.96 | 54.17 | 7.87  |                  |            |
| 32   | 32       | 523     | 3/26/2015 | 34.32851 | -93.07111 | 0      | 95   | 1     | 37   | 7      | 177.91    | 6004.64 | 45.71      | 8.39  | 37.96 | 54.17 | 7.87  |                  |            |
| 32   | 32       | 524     | 3/26/2015 | 34.32851 | -93.07111 | 0      | 88   | 1     | 39   | 3      | 177.80    | 6008.25 | 55.30      | 11.43 | 37.96 | 54.17 | 7.87  |                  |            |
| 32   | 32       | 525     | 3/26/2015 | 34.32851 | -93.07111 | 0      | 75   | 1     | 12   | 3      | 177.77    | 6009.15 | 65.11      | 8.75  | 37.96 | 54.17 | 7.87  |                  |            |
| 32   | 32       | 526     | 3/26/2015 | 34.32851 | -93.07111 | 16     | 65   | 1     | 27   | 3      | 177.87    | 6009.57 | 74.96      | 9.31  | 37.96 | 54.17 | 7.87  |                  |            |
| 32   | 32       | 527     | 3/26/2015 | 34.32851 | -93.07111 | 50     | 65   | 1     | 7    | 3      | 178.04    | 6009.18 | 84.86      | 7.73  | 37.96 | 54.17 | 7.87  |                  |            |
| 34   | 34       | 528     | 3/25/2015 | 34.53791 | -93.23159 | 0      | 100  | 0     | 48   | 0      | 189.71    | 6007.03 | 146.87     | 8.46  | 29.70 | 56.02 | 14.28 |                  |            |
| 34   | 34       | 529     | 3/25/2015 | 34.53791 | -93.23159 | 0      | 100  | 0     | 57   | 0      | 189.64    | 6005.51 | 141.29     | 8.30  | 29.70 | 56.02 | 14.28 |                  |            |
| 34   | 34       | 530     | 3/25/2015 | 34.53791 | -93.23159 | 0      | 100  | 0     | 82   | 0      | 189.64    | 6004.94 | 136.31     | 9.01  | 29.70 | 56.02 | 14.28 |                  |            |
| 34   | 34       | 531     | 3/25/2015 | 34.53791 | -93.23159 | 0      | 100  | 0     | 46   | 0      | 189.61    | 6007.42 | 131.89     | 8.16  | 29.70 | 56.02 | 14.28 |                  |            |
| 34   | 34       | 532     | 3/25/2015 | 34.53791 | -93.23159 | 0      | 100  | 0     | 42   | 0      | 189.47    | 6009.58 | 127.65     | 8.63  | 29.70 | 56.02 | 14.28 |                  |            |
| 34   | 34       | 533     | 3/25/2015 | 34.53791 | -93.23159 | 0      | 90   | 0     | 36   | 0      | 189.28    | 6010.34 | 123.86     | 8.94  | 29.70 | 56.02 | 14.28 |                  |            |
| 36   | 36       | 534     | 4/1/2015  | 34.1408  | -93.89461 | 0      | 70   | 0     | 35   | 0      | 179.92    | 6005.58 | 241.73     | 8.34  | 69.01 | 27.73 | 3.26  |                  |            |
| 36   | 36       | 535     | 4/1/2015  | 34.1408  | -93.89461 | 0      | 65   | 0     | 52   | 0      | 179.83    | 6004.61 | 249.10     | 10.18 | 69.01 | 27.73 | 3.26  |                  |            |
| 36   | 36       | 536     | 4/1/2015  | 34.1408  | -93.89461 | 0      | 70   | 0     | 56   | 0      | 179.77    | 6004.87 | 256.78     | 7.38  | 69.01 | 27.73 | 3.26  |                  |            |
| 36   | 36       | 537     | 4/1/2015  | 34.1408  | -93.89461 | 0      | 80   | 0     | 79   | 0      | 179.68    | 6005.49 | 264.48     | 9.59  | 69.01 | 27.73 | 3.26  |                  |            |
| 36   | 36       | 538     | 4/1/2015  | 34.1408  | -93.89461 | 0      | 85   | 0     | 42   | 0      | 179.72    | 6005.76 | 272.47     | 9.71  | 69.01 | 27.73 | 3.26  |                  |            |

**Table C.1 cont'd**

| Site | Transect | Quadrat | Date      | Latitude | Longitude | Canopy | Herb | Sedge | Stem | Burrow | Elevation | Solar   | Water dist | CTI   | Sand  | Silt  | Clay  | Burrow ownership | Water trns |
|------|----------|---------|-----------|----------|-----------|--------|------|-------|------|--------|-----------|---------|------------|-------|-------|-------|-------|------------------|------------|
| 36   | 36       | 539     | 4/1/2015  | 34.1408  | -93.89461 | 0      | 30   | 0     | 0    | 0      | 179.61    | 6005.54 | 279.28     | 9.67  | 69.01 | 27.73 | 3.26  |                  |            |
| 37   | 37       | 540     | 3/27/2015 | 34.10069 | -93.57496 | 0      | 99   | 0     | 27   | 0      | 177.12    | 6004.02 | 116.42     | 8.62  | 31.02 | 57.97 | 11.01 |                  |            |
| 37   | 37       | 541     | 3/27/2015 | 34.10069 | -93.57496 | 0      | 100  | 0     | 29   | 0      | 177.08    | 6003.55 | 111.25     | 9.05  | 31.02 | 57.97 | 11.01 |                  |            |
| 37   | 37       | 542     | 3/27/2015 | 34.10069 | -93.57496 | 0      | 95   | 1     | 17   | 0      | 177.07    | 6003.41 | 106.75     | 9.49  | 31.02 | 57.97 | 11.01 |                  |            |
| 37   | 37       | 543     | 3/27/2015 | 34.10069 | -93.57496 | 0      | 90   | 1     | 22   | 0      | 177.05    | 6003.45 | 102.25     | 9.41  | 31.02 | 57.97 | 11.01 |                  |            |
| 37   | 37       | 544     | 3/27/2015 | 34.10069 | -93.57496 | 0      | 99   | 0     | 32   | 0      | 177.03    | 6002.99 | 97.79      | 9.92  | 31.02 | 57.97 | 11.01 |                  |            |
| 37   | 37       | 545     | 3/27/2015 | 34.10069 | -93.57496 | 0      | 90   | 1     | 25   | 0      | 177.03    | 6002.37 | 94.02      | 10.67 | 31.02 | 57.97 | 11.01 |                  |            |
| 38   | 38       | 546     | 4/3/2015  | 34.14672 | -94.30036 | 100    | 46   | 0     | 36   | 0      | 190.52    | 6011.67 | 329.66     | 8.54  | 35.53 | 54.25 | 10.22 |                  |            |
| 38   | 38       | 547     | 4/3/2015  | 34.14672 | -94.30036 | 5      | 80   | 0     | 17   | 0      | 190.39    | 6012.11 | 332.47     | 7.34  | 35.53 | 54.25 | 10.22 |                  |            |
| 38   | 38       | 548     | 4/3/2015  | 34.14672 | -94.30036 | 8      | 85   | 0     | 17   | 0      | 190.24    | 6012.19 | 335.31     | 8.75  | 35.53 | 54.25 | 10.22 |                  |            |
| 38   | 38       | 549     | 4/3/2015  | 34.14672 | -94.30036 | 2      | 80   | 0     | 42   | 0      | 189.99    | 6013.28 | 338.51     | 8.70  | 35.53 | 54.25 | 10.22 |                  |            |
| 38   | 38       | 550     | 4/3/2015  | 34.14672 | -94.30036 | 92     | 20   | 0     | 7    | 0      | 189.73    | 6013.80 | 341.88     | 8.70  | 35.53 | 54.25 | 10.22 |                  |            |
| 38   | 38       | 551     | 4/3/2015  | 34.14672 | -94.30036 | 0      | 45   | 0     | 14   | 0      | 189.39    | 6013.65 | 345.60     | 9.10  | 35.53 | 54.25 | 10.22 |                  |            |
| 43   | 43       | 552     | 3/26/2015 | 34.36023 | -93.03284 | 28     | 80   | 0     | 21   | 0      | 192.98    | 6005.74 | 371.58     | 7.79  | 17.62 | 65.56 | 16.82 |                  |            |
| 43   | 43       | 553     | 3/26/2015 | 34.36023 | -93.03284 | 12     | 70   | 0     | 39   | 0      | 193.08    | 6004.94 | 361.99     | 7.15  | 17.62 | 65.56 | 16.82 |                  |            |
| 43   | 43       | 554     | 3/26/2015 | 34.36023 | -93.03284 | 0      | 55   | 0     | 25   | 0      | 192.91    | 6004.12 | 352.37     | 8.97  | 17.62 | 65.56 | 16.82 |                  |            |
| 43   | 43       | 555     | 3/26/2015 | 34.36023 | -93.03284 | 0      | 95   | 1     | 23   | 0      | 192.96    | 6003.47 | 342.82     | 9.06  | 17.62 | 65.56 | 16.82 |                  |            |
| 43   | 43       | 556     | 3/26/2015 | 34.36023 | -93.03284 | 0      | 85   | 0     | 7    | 0      | 193.00    | 6002.45 | 333.25     | 8.45  | 17.62 | 65.56 | 16.82 |                  |            |
| 43   | 43       | 557     | 3/26/2015 | 34.36023 | -93.03284 | 0      | 85   | 0     | 14   | 0      | 192.83    | 6002.67 | 323.75     | 8.97  | 17.62 | 65.56 | 16.82 |                  |            |
| 45   | 45       | 558     | 3/28/2015 | 34.47732 | -93.26605 | 48     | 90   | 1     | 27   | 0      | 163.00    | 5982.89 | 69.77      | 11.91 | 30.42 | 57.12 | 12.46 |                  |            |
| 45   | 45       | 559     | 3/28/2015 | 34.47732 | -93.26605 | 5      | 95   | 0     | 32   | 0      | 163.02    | 5981.12 | 60.67      | 14.78 | 30.42 | 57.12 | 12.46 |                  |            |
| 45   | 45       | 560     | 3/28/2015 | 34.47732 | -93.26605 | 36     | 100  | 1     | 54   | 0      | 163.02    | 5981.40 | 51.91      | 12.82 | 30.42 | 57.12 | 12.46 |                  |            |
| 45   | 45       | 561     | 3/28/2015 | 34.47732 | -93.26605 | 3      | 100  | 0     | 60   | 0      | 163.02    | 5982.40 | 43.68      | 16.82 | 30.42 | 57.12 | 12.46 |                  |            |
| 45   | 45       | 562     | 3/28/2015 | 34.47732 | -93.26605 | 5      | 90   | 0     | 74   | 0      | 163.02    | 5982.40 | 36.34      | 16.82 | 30.42 | 57.12 | 12.46 |                  |            |
| 45   | 45       | 563     | 3/28/2015 | 34.47732 | -93.26605 | 1      | 95   | 0     | 38   | 0      | 163.02    | 5982.63 | 30.60      | 10.31 | 30.42 | 57.12 | 12.46 |                  |            |
| 48   | 48       | 564     | 3/23/2015 | 34.80642 | -92.77906 | 47     | 100  | 1     | 30   | 3      | 177.59    | 5995.43 | 185.99     | 12.53 | 23.60 | 66.03 | 10.37 |                  |            |
| 48   | 48       | 565     | 3/23/2015 | 34.80642 | -92.77906 | 78     | 70   | 1     | 0    | 1      | 177.91    | 5999.93 | 193.19     | 6.68  | 23.60 | 66.03 | 10.37 |                  |            |

**Table C.1 cont'd**

| Site | Transect | Quadrat | Date      | Latitude | Longitude  | Canopy | Herb | Sedge | Stem | Burrow | Elevation | Solar   | Water dist | CTI   | Sand  | Silt  | Clay  | Burrow ownership | Water trns |
|------|----------|---------|-----------|----------|------------|--------|------|-------|------|--------|-----------|---------|------------|-------|-------|-------|-------|------------------|------------|
| 48   | 48       | 566     | 3/23/2015 | 34.80642 | -92.77906  | 62     | 78   | 1     | 18   | 0      | 178.04    | 6001.68 | 200.63     | 9.82  | 23.60 | 66.03 | 10.37 |                  |            |
| 48   | 48       | 567     | 3/23/2015 | 34.80642 | -92.77906  | 60     | 90   | 1     | 45   | 0      | 178.49    | 6001.84 | 208.36     | 6.67  | 23.60 | 66.03 | 10.37 |                  |            |
| 48   | 48       | 568     | 3/23/2015 | 34.80642 | -92.77906  | 48     | 95   | 1     | 55   | 0      | 178.79    | 6000.62 | 216.21     | 7.49  | 23.60 | 66.03 | 10.37 |                  |            |
| 48   | 48       | 569     | 3/23/2015 | 34.80642 | -92.77906  | 0      | 90   | 1     | 38   | 0      | 179.06    | 5999.52 | 224.23     | 13.12 | 23.60 | 66.03 | 10.37 |                  |            |
| 49   | 49       | 570     | 4/1/2015  | 34.18689 | -93.83407  | 4      | 70   | 1     | 12   | 6      | 196.56    | 6014.11 | 121.30     | 8.63  | 40.87 | 53.48 | 5.65  |                  |            |
| 49   | 49       | 571     | 4/1/2015  | 34.18689 | -93.83407  | 22     | 45   | 1     | 11   | 6      | 197.31    | 6014.56 | 91.65      | 7.41  | 40.87 | 53.48 | 5.65  |                  |            |
| 49   | 49       | 572     | 4/1/2015  | 34.18689 | -93.83407  | 6      | 20   | 1     | 3    | 4      | 197.55    | 6008.66 | 83.82      | 6.52  | 40.87 | 53.48 | 5.65  |                  |            |
| 49   | 49       | 573     | 4/1/2015  | 34.18689 | -93.83407  | 5      | 40   | 1     | 13   | 4      | 196.78    | 6014.40 | 99.66      | 7.72  | 40.87 | 53.48 | 5.65  |                  |            |
| 49   | 49       | 574     | 4/1/2015  | 34.18689 | -93.83407  | 43     | 15   | 1     | 13   | 4      | 196.56    | 6014.11 | 115.54     | 8.63  | 40.87 | 53.48 | 5.65  |                  |            |
| 49   | 49       | 575     | 4/1/2015  | 34.18689 | -93.83407  | 22     | 30   | 0     | 13   | 2      | 196.54    | 6011.93 | 107.44     | 8.24  | 40.87 | 53.48 | 5.65  |                  |            |
| 51   | 51       | 576     | 3/31/2015 | 34.53489 | -93.56304  | 0      | 95   | 0     | 24   | 1      | 207.45    | 5993.98 | 59.72      | 7.10  | 42.72 | 52.94 | 4.34  |                  |            |
| 51   | 51       | 577     | 3/31/2015 | 34.53489 | -93.56304  | 0      | 99   | 0     | 22   | 1      | 207.39    | 5996.18 | 68.05      | 8.68  | 42.72 | 52.94 | 4.34  |                  |            |
| 51   | 51       | 578     | 3/31/2015 | 34.53489 | -93.56304  | 0      | 95   | 1     | 44   | 1      | 207.34    | 5998.68 | 76.66      | 7.28  | 42.72 | 52.94 | 4.34  |                  |            |
| 51   | 51       | 579     | 3/31/2015 | 34.53489 | -93.56304  | 0      | 99   | 1     | 12   | 0      | 207.35    | 6001.15 | 81.34      | 7.39  | 42.72 | 52.94 | 4.34  |                  |            |
| 51   | 51       | 580     | 3/31/2015 | 34.53489 | -93.56304  | 0      | 65   | 1     | 22   | 0      | 207.35    | 6003.62 | 73.53      | 7.53  | 42.72 | 52.94 | 4.34  |                  |            |
| 51   | 51       | 581     | 3/31/2015 | 34.53489 | -93.56304  | 0      | 45   | 1     | 13   | 0      | 207.35    | 6005.20 | 66.30      | 7.63  | 42.72 | 52.94 | 4.34  |                  |            |
| 52   | 52       | 582     | 3/29/2015 | 34.40523 | -93.620426 | 0      | 99   | 0     | 42   | 0      | 191.41    | 5998.33 | 208.11     | 9.20  | 20.61 | 55.36 | 24.03 |                  |            |
| 52   | 52       | 583     | 3/29/2015 | 34.40523 | -93.620426 | 0      | 95   | 0     | 11   | 0      | 191.46    | 5999.88 | 201.13     | 8.40  | 20.61 | 55.36 | 24.03 |                  |            |
| 52   | 52       | 584     | 3/29/2015 | 34.40523 | -93.620426 | 0      | 90   | 0     | 24   | 0      | 191.45    | 6000.16 | 194.14     | 11.04 | 20.61 | 55.36 | 24.03 |                  |            |
| 52   | 52       | 585     | 3/29/2015 | 34.40523 | -93.620426 | 0      | 85   | 1     | 35   | 0      | 191.62    | 6001.40 | 187.48     | 10.26 | 20.61 | 55.36 | 24.03 |                  |            |
| 52   | 52       | 586     | 3/29/2015 | 34.40523 | -93.620426 | 0      | 85   | 1     | 35   | 0      | 191.70    | 6001.69 | 181.05     | 8.05  | 20.61 | 55.36 | 24.03 |                  |            |
| 52   | 52       | 587     | 3/29/2015 | 34.40523 | -93.620426 | 0      | 80   | 1     | 42   | 0      | 191.80    | 6002.70 | 172.30     | 10.07 | 20.61 | 55.36 | 24.03 |                  |            |
| 53   | 53       | 588     | 3/28/2015 | 34.35356 | -93.47742  | 0      | 65   | 1     | 39   | 0      | 198.08    | 6020.91 | 99.32      | 7.65  | 41.95 | 50.37 | 7.68  |                  |            |
| 53   | 53       | 589     | 3/28/2015 | 34.35356 | -93.47742  | 0      | 85   | 0     | 37   | 0      | 198.49    | 6018.53 | 98.68      | 7.11  | 41.95 | 50.37 | 7.68  |                  |            |
| 53   | 53       | 590     | 3/28/2015 | 34.35356 | -93.47742  | 0      | 90   | 0     | 48   | 0      | 198.42    | 6019.68 | 99.14      | 11.64 | 41.95 | 50.37 | 7.68  |                  |            |
| 53   | 53       | 591     | 3/28/2015 | 34.35356 | -93.47742  | 0      | 80   | 0     | 52   | 0      | 198.46    | 6019.49 | 99.88      | 9.84  | 41.95 | 50.37 | 7.68  |                  |            |
| 53   | 53       | 592     | 3/28/2015 | 34.35356 | -93.47742  | 0      | 85   | 0     | 64   | 0      | 198.98    | 6023.57 | 101.56     | 7.56  | 41.95 | 50.37 | 7.68  |                  |            |



**Table C.1 cont'd**

| Site | Transect | Quadrat | Date      | Latitude | Longitude | Canopy | Herb | Sedge | Stem | Burrow | Elevation | Solar   | Water dist | CTI   | Sand  | Silt  | Clay  | Burrow ownership | Water trns |
|------|----------|---------|-----------|----------|-----------|--------|------|-------|------|--------|-----------|---------|------------|-------|-------|-------|-------|------------------|------------|
| 53   | 53       | 593     | 3/28/2015 | 34.35356 | -93.47742 | 0      | 95   | 0     | 68   | 0      | 198.99    | 6022.94 | 100.72     | 8.27  | 41.95 | 50.37 | 7.68  |                  |            |
| 55   | 55       | 594     | 3/23/2015 | 34.79232 | -92.66393 | 11     | 100  | 0     | 18   | 0      | 186.10    | 6005.96 | 123.60     | 6.78  | 20.64 | 64.61 | 14.76 |                  |            |
| 55   | 55       | 595     | 3/23/2015 | 34.79232 | -92.66393 | 0      | 45   | 0     | 6    | 0      | 186.25    | 6004.61 | 123.78     | 7.20  | 20.64 | 64.61 | 14.76 |                  |            |
| 55   | 55       | 596     | 3/23/2015 | 34.79232 | -92.66393 | 13     | 20   | 0     | 4    | 0      | 186.35    | 6004.68 | 124.07     | 7.28  | 20.64 | 64.61 | 14.76 |                  |            |
| 55   | 55       | 597     | 3/23/2015 | 34.79232 | -92.66393 | 0      | 35   | 0     | 23   | 0      | 186.44    | 6005.14 | 124.25     | 7.33  | 20.64 | 64.61 | 14.76 |                  |            |
| 55   | 55       | 598     | 3/23/2015 | 34.79232 | -92.66393 | 14     | 90   | 0     | 10   | 0      | 186.48    | 6005.82 | 124.42     | 7.25  | 20.64 | 64.61 | 14.76 |                  |            |
| 55   | 55       | 599     | 3/23/2015 | 34.79232 | -92.66393 | 10     | 90   | 0     | 8    | 0      | 186.04    | 6010.43 | 124.71     | 7.10  | 20.64 | 64.61 | 14.76 |                  |            |
| 56   | 56       | 600     | 3/26/2015 | 34.33267 | -93.32069 | 78     | 3    | 0     | 0    | 0      | 173.89    | 6001.21 | 289.69     | 8.86  | 19.59 | 63.74 | 16.67 |                  |            |
| 56   | 56       | 601     | 3/26/2015 | 34.33267 | -93.32069 | 48     | 100  | 1     | 37   | 0      | 173.72    | 5996.12 | 295.72     | 9.86  | 19.59 | 63.74 | 16.67 |                  |            |
| 56   | 56       | 602     | 3/26/2015 | 34.33267 | -93.32069 | 100    | 100  | 1     | 18   | 0      | 173.74    | 5993.30 | 301.88     | 9.39  | 19.59 | 63.74 | 16.67 |                  |            |
| 56   | 56       | 603     | 3/26/2015 | 34.33267 | -93.32069 | 48     | 85   | 0     | 12   | 0      | 173.52    | 5994.06 | 308.37     | 8.73  | 19.59 | 63.74 | 16.67 |                  |            |
| 56   | 56       | 604     | 3/26/2015 | 34.33267 | -93.32069 | 84     | 70   | 0     | 7    | 0      | 173.54    | 5992.43 | 314.91     | 8.55  | 19.59 | 63.74 | 16.67 |                  |            |
| 56   | 56       | 605     | 3/26/2015 | 34.33267 | -93.32069 | 90     | 25   | 1     | 2    | 0      | 173.60    | 5991.73 | 321.71     | 8.92  | 19.59 | 63.74 | 16.67 |                  |            |
| 58   | 58       | 606     | 4/1/2015  | 34.13091 | -93.96602 | 0      | 10   | 0     | 0    | 7      | 167.90    | 5993.80 | 238.24     | 7.48  | 39.95 | 54.66 | 5.38  |                  |            |
| 58   | 58       | 607     | 4/1/2015  | 34.13091 | -93.96602 | 0      | 8    | 1     | 2    | 5      | 167.40    | 5996.86 | 231.06     | 8.04  | 39.95 | 54.66 | 5.38  |                  |            |
| 58   | 58       | 608     | 4/1/2015  | 34.13091 | -93.96602 | 0      | 5    | 1     | 0    | 2      | 166.95    | 5994.51 | 223.85     | 8.34  | 39.95 | 54.66 | 5.38  |                  |            |
| 58   | 58       | 609     | 4/1/2015  | 34.13091 | -93.96602 | 10     | 3    | 1     | 0    | 1      | 166.73    | 5995.94 | 216.66     | 9.58  | 39.95 | 54.66 | 5.38  |                  |            |
| 58   | 58       | 610     | 4/1/2015  | 34.13091 | -93.96602 | 52     | 15   | 0     | 0    | 0      | 166.39    | 5997.26 | 208.86     | 9.88  | 39.95 | 54.66 | 5.38  |                  |            |
| 58   | 58       | 611     | 4/1/2015  | 34.13091 | -93.96602 | 28     | 3    | 0     | 0    | 0      | 166.22    | 5996.57 | 200.28     | 10.31 | 39.95 | 54.66 | 5.38  |                  |            |
| 62   | 62       | 612     | 3/27/2015 | 34.11237 | -93.52864 | 0      | 90   | 0     | 12   | 0      | 208.99    | 6027.30 | 155.19     | 8.17  | 56.15 | 34.93 | 7.67  |                  |            |
| 62   | 62       | 613     | 3/27/2015 | 34.11237 | -93.52864 | 0      | 80   | 1     | 27   | 0      | 208.84    | 6027.82 | 147.87     | 8.49  | 56.15 | 34.93 | 7.67  |                  |            |
| 62   | 62       | 614     | 3/27/2015 | 34.11237 | -93.52864 | 0      | 85   | 0     | 19   | 0      | 208.63    | 6025.55 | 140.84     | 9.35  | 56.15 | 34.93 | 7.67  |                  |            |
| 62   | 62       | 615     | 3/27/2015 | 34.11237 | -93.52864 | 0      | 95   | 0     | 36   | 0      | 208.63    | 6026.49 | 134.23     | 7.70  | 56.15 | 34.93 | 7.67  |                  |            |
| 62   | 62       | 616     | 3/27/2015 | 34.11237 | -93.52864 | 0      | 90   | 1     | 21   | 0      | 208.43    | 6028.25 | 128.04     | 7.94  | 56.15 | 34.93 | 7.67  |                  |            |
| 62   | 62       | 617     | 3/27/2015 | 34.11237 | -93.52864 | 0      | 35   | 1     | 33   | 0      | 208.21    | 6029.04 | 122.37     | 8.13  | 56.15 | 34.93 | 7.67  |                  |            |
| 65   | 65       | 618     | 3/29/2015 | 34.26972 | -93.45657 | 0      | 80   | 0     | 34   | 3      | 168.79    | 5999.32 | 186.65     | 5.82  | 38.93 | 50.66 | 10.41 |                  |            |
| 65   | 65       | 619     | 3/29/2015 | 34.26972 | -93.45657 | 0      | 85   | 0     | 32   | 2      | 168.79    | 5999.32 | 194.88     | 5.82  | 38.93 | 50.66 | 10.41 |                  |            |

Table C.1 cont'd

| Site | Transect | Quadrat | Date      | Latitude | Longitude | Canopy | Herb | Sedge | Stem | Burrow | Elevation | Solar   | Water dist | CTI   | Sand  | Silt  | Clay  | Burrow ownership | Water trns |
|------|----------|---------|-----------|----------|-----------|--------|------|-------|------|--------|-----------|---------|------------|-------|-------|-------|-------|------------------|------------|
| 65   | 65       | 620     | 3/29/2015 | 34.26972 | -93.45657 | 0      | 90   | 0     | 42   | 2      | 169.76    | 6005.20 | 203.25     | 6.18  | 38.93 | 50.66 | 10.41 |                  |            |
| 65   | 65       | 621     | 3/29/2015 | 34.26972 | -93.45657 | 4      | 80   | 1     | 68   | 1      | 169.78    | 5995.13 | 211.67     | 6.20  | 38.93 | 50.66 | 10.41 |                  |            |
| 65   | 65       | 622     | 3/29/2015 | 34.26972 | -93.45657 | 0      | 45   | 1     | 13   | 1      | 170.03    | 5991.24 | 220.31     | 7.14  | 38.93 | 50.66 | 10.41 |                  |            |
| 65   | 65       | 623     | 3/29/2015 | 34.26972 | -93.45657 | 16     | 65   | 1     | 56   | 0      | 169.63    | 5995.67 | 229.08     | 7.70  | 38.93 | 50.66 | 10.41 |                  |            |
| 67   | 67       | 624     | 3/27/2015 | 34.10209 | -93.52663 | 0      | 15   | 0     | 0    | 0      | 201.20    | 6006.28 | 377.51     | 8.81  | 56.15 | 34.93 | 7.67  |                  |            |
| 67   | 67       | 625     | 3/27/2015 | 34.10209 | -93.52663 | 32     | 35   | 1     | 7    | 0      | 201.48    | 6008.48 | 373.55     | 8.21  | 56.15 | 34.93 | 7.67  |                  |            |
| 67   | 67       | 626     | 3/27/2015 | 34.10209 | -93.52663 | 0      | 90   | 0     | 19   | 0      | 201.53    | 6013.17 | 369.82     | 8.34  | 56.15 | 34.93 | 7.67  |                  |            |
| 67   | 67       | 627     | 3/27/2015 | 34.10209 | -93.52663 | 0      | 70   | 1     | 39   | 0      | 201.52    | 6015.67 | 366.32     | 7.76  | 56.15 | 34.93 | 7.67  |                  |            |
| 67   | 67       | 628     | 3/27/2015 | 34.10209 | -93.52663 | 1      | 80   | 1     | 19   | 0      | 201.52    | 6015.67 | 363.07     | 7.76  | 56.15 | 34.93 | 7.67  |                  |            |
| 67   | 67       | 629     | 3/27/2015 | 34.10209 | -93.52663 | 0      | 20   | 0     | 3    | 0      | 201.41    | 6018.39 | 359.92     | 7.73  | 56.15 | 34.93 | 7.67  |                  |            |
| 68   | 68       | 630     | 3/26/2015 | 34.44685 | -93.21099 | 0      | 100  | 0     | 42   | 2      | 173.27    | 5998.05 | 345.14     | 6.67  | 37.98 | 48.68 | 13.35 | <i>F. harpi</i>  |            |
| 68   | 68       | 631     | 3/26/2015 | 34.44685 | -93.21099 | 0      | 90   | 0     | 27   | 1      | 172.98    | 5995.88 | 352.71     | 8.30  | 37.98 | 48.68 | 13.35 | <i>F. harpi</i>  |            |
| 68   | 68       | 632     | 3/26/2015 | 34.44685 | -93.21099 | 0      | 55   | 1     | 7    | 1      | 172.61    | 5996.35 | 345.62     | 9.23  | 37.98 | 48.68 | 13.35 | <i>F. harpi</i>  |            |
| 68   | 68       | 633     | 3/26/2015 | 34.44685 | -93.21099 | 0      | 100  | 0     | 47   | 1      | 172.22    | 5997.77 | 335.75     | 7.30  | 37.98 | 48.68 | 13.35 | <i>F. harpi</i>  |            |
| 68   | 68       | 634     | 3/26/2015 | 34.44685 | -93.21099 | 0      | 100  | 0     | 20   | 0      | 172.22    | 5997.77 | 325.98     | 7.30  | 37.98 | 48.68 | 13.35 |                  |            |
| 68   | 68       | 635     | 3/26/2015 | 34.44685 | -93.21099 | 0      | 100  | 0     | 31   | 0      | 172.08    | 5994.31 | 316.22     | 6.54  | 37.98 | 48.68 | 13.35 |                  |            |
| 70   | 70       | 636     | 3/31/2015 | 34.65402 | -93.6782  | 0      | 90   | 0     | 64   | 2      | 213.88    | 6019.61 | 111.10     | 10.50 | 21.64 | 63.39 | 14.97 |                  |            |
| 70   | 70       | 637     | 3/31/2015 | 34.65402 | -93.6782  | 0      | 95   | 1     | 33   | 1      | 213.86    | 6019.90 | 117.33     | 12.78 | 21.64 | 63.39 | 14.97 |                  |            |
| 70   | 70       | 638     | 3/31/2015 | 34.65402 | -93.6782  | 0      | 88   | 1     | 39   | 0      | 213.87    | 6019.26 | 123.30     | 11.71 | 21.64 | 63.39 | 14.97 |                  |            |
| 70   | 70       | 639     | 3/31/2015 | 34.65402 | -93.6782  | 0      | 75   | 1     | 35   | 0      | 213.82    | 6018.70 | 129.40     | 11.15 | 21.64 | 63.39 | 14.97 |                  |            |
| 70   | 70       | 640     | 3/31/2015 | 34.65402 | -93.6782  | 0      | 90   | 1     | 32   | 0      | 213.77    | 6018.53 | 135.09     | 10.64 | 21.64 | 63.39 | 14.97 |                  |            |
| 70   | 70       | 641     | 3/31/2015 | 34.65402 | -93.6782  | 0      | 80   | 1     | 54   | 0      | 213.58    | 6018.51 | 140.06     | 7.69  | 21.64 | 63.39 | 14.97 |                  |            |
| 75   | 75       | 642     | 3/28/2015 | 34.27823 | -93.51379 | 0      | 85   | 0     | 35   | 0      | 175.55    | 6001.46 | 332.63     | 6.92  | 30.56 | 58.63 | 10.81 |                  |            |
| 75   | 75       | 643     | 3/28/2015 | 34.27823 | -93.51379 | 38     | 70   | 0     | 17   | 0      | 175.55    | 5999.06 | 327.18     | 8.70  | 30.56 | 58.63 | 10.81 |                  |            |
| 75   | 75       | 644     | 3/28/2015 | 34.27823 | -93.51379 | 36     | 65   | 0     | 37   | 0      | 175.84    | 6002.06 | 321.98     | 8.66  | 30.56 | 58.63 | 10.81 |                  |            |
| 75   | 75       | 645     | 3/28/2015 | 34.27823 | -93.51379 | 29     | 30   | 0     | 25   | 0      | 176.02    | 6003.59 | 316.98     | 9.89  | 30.56 | 58.63 | 10.81 |                  |            |
| 75   | 75       | 646     | 3/28/2015 | 34.27823 | -93.51379 | 76     | 55   | 0     | 39   | 0      | 176.65    | 6002.79 | 312.26     | 8.02  | 30.56 | 58.63 | 10.81 |                  |            |

**Table C.1 cont'd**

| Site | Transect | Quadrat | Date      | Latitude | Longitude | Canopy | Herb | Sedge | Stem | Burrow | Elevation | Solar   | Water dist | CTI   | Sand  | Silt  | Clay  | Burrow ownership | Water trns |
|------|----------|---------|-----------|----------|-----------|--------|------|-------|------|--------|-----------|---------|------------|-------|-------|-------|-------|------------------|------------|
| 75   | 75       | 647     | 3/28/2015 | 34.27823 | -93.51379 | 49     | 25   | 0     | 0    | 0      | 176.93    | 6004.80 | 307.49     | 9.39  | 30.56 | 58.63 | 10.81 |                  |            |
| 76   | 76       | 648     | 3/25/2015 | 34.64294 | -92.94296 | 18     | 99   | 1     | 34   | 0      | 179.15    | 6004.16 | 130.71     | 8.98  | 29.68 | 59.40 | 10.92 |                  |            |
| 76   | 76       | 649     | 3/25/2015 | 34.64294 | -92.94296 | 52     | 99   | 1     | 14   | 0      | 179.48    | 6005.30 | 129.79     | 8.70  | 29.68 | 59.40 | 10.92 |                  |            |
| 76   | 76       | 650     | 3/25/2015 | 34.64294 | -92.94296 | 60     | 35   | 0     | 0    | 0      | 179.81    | 6006.07 | 128.88     | 8.41  | 29.68 | 59.40 | 10.92 |                  |            |
| 76   | 76       | 651     | 3/25/2015 | 34.64294 | -92.94296 | 33     | 80   | 1     | 19   | 0      | 180.14    | 6006.38 | 127.89     | 8.16  | 29.68 | 59.40 | 10.92 |                  |            |
| 76   | 76       | 652     | 3/25/2015 | 34.64294 | -92.94296 | 100    | 25   | 0     | 2    | 0      | 180.15    | 6006.48 | 126.98     | 8.13  | 29.68 | 59.40 | 10.92 |                  |            |
| 76   | 76       | 653     | 3/25/2015 | 34.64294 | -92.94296 | 60     | 3    | 0     | 0    | 0      | 180.47    | 6006.13 | 126.06     | 12.32 | 29.68 | 59.40 | 10.92 |                  |            |
| 77   | 77       | 654     | 4/2/2015  | 34.24662 | -94.01553 | 29     | 95   | 0     | 24   | 3      | 211.22    | 6018.27 | 52.01      | 10.43 | 51.36 | 42.15 | 6.49  |                  |            |
| 77   | 77       | 655     | 4/2/2015  | 34.24662 | -94.01553 | 24     | 98   | 0     | 21   | 3      | 211.31    | 6017.80 | 54.71      | 10.07 | 51.36 | 42.15 | 6.49  |                  |            |
| 77   | 77       | 656     | 4/2/2015  | 34.24662 | -94.01553 | 25     | 80   | 0     | 38   | 3      | 211.43    | 6016.99 | 57.29      | 12.70 | 51.36 | 42.15 | 6.49  |                  |            |
| 77   | 77       | 657     | 4/2/2015  | 34.24662 | -94.01553 | 10     | 85   | 0     | 12   | 2      | 211.58    | 6016.27 | 60.00      | 12.51 | 51.36 | 42.15 | 6.49  |                  |            |
| 77   | 77       | 658     | 4/2/2015  | 34.24662 | -94.01553 | 15     | 99   | 0     | 22   | 2      | 211.75    | 6015.74 | 62.59      | 12.34 | 51.36 | 42.15 | 6.49  |                  |            |
| 77   | 77       | 659     | 4/2/2015  | 34.24662 | -94.01553 | 10     | 95   | 0     | 19   | 0      | 212.06    | 6008.76 | 65.28      | 8.32  | 51.36 | 42.15 | 6.49  |                  |            |
| 78   | 78       | 660     | 3/30/2015 | 34.57817 | -93.57967 | 4      | 95   | 1     | 22   | 0      | 176.82    | 5991.79 | 116.08     | 9.29  | 15.63 | 74.09 | 10.28 |                  |            |
| 78   | 78       | 661     | 3/30/2015 | 34.57817 | -93.57967 | 0      | 88   | 0     | 42   | 0      | 176.82    | 5991.15 | 107.76     | 9.69  | 15.63 | 74.09 | 10.28 |                  |            |
| 78   | 78       | 662     | 3/30/2015 | 34.57817 | -93.57967 | 2      | 65   | 1     | 9    | 0      | 176.83    | 5990.62 | 99.38      | 9.27  | 15.63 | 74.09 | 10.28 |                  |            |
| 78   | 78       | 663     | 3/30/2015 | 34.57817 | -93.57967 | 24     | 45   | 1     | 12   | 0      | 176.86    | 5989.20 | 90.65      | 8.33  | 15.63 | 74.09 | 10.28 |                  |            |
| 78   | 78       | 664     | 3/30/2015 | 34.57817 | -93.57967 | 56     | 70   | 1     | 54   | 0      | 177.02    | 5983.28 | 81.60      | 7.24  | 15.63 | 74.09 | 10.28 |                  |            |
| 78   | 78       | 665     | 3/30/2015 | 34.57817 | -93.57967 | 52     | 60   | 0     | 32   | 0      | 177.32    | 5979.85 | 72.23      | 6.91  | 15.63 | 74.09 | 10.28 |                  |            |
| 80   | 80       | 666     | 4/2/2015  | 34.20946 | -94.05049 | 98     | 75   | 1     | 32   | 0      | 156.84    | 5980.20 | 55.85      | 8.17  | 39.90 | 48.71 | 11.39 |                  |            |
| 80   | 80       | 667     | 4/2/2015  | 34.20946 | -94.05049 | 56     | 80   | 0     | 29   | 0      | 156.92    | 5980.98 | 61.12      | 7.47  | 39.90 | 48.71 | 11.39 |                  |            |
| 80   | 80       | 668     | 4/2/2015  | 34.20946 | -94.05049 | 4      | 65   | 0     | 47   | 0      | 156.94    | 5981.31 | 64.74      | 8.54  | 39.90 | 48.71 | 11.39 |                  |            |
| 80   | 80       | 669     | 4/2/2015  | 34.20946 | -94.05049 | 18     | 85   | 0     | 46   | 0      | 156.97    | 5981.38 | 68.23      | 8.18  | 39.90 | 48.71 | 11.39 |                  |            |
| 80   | 80       | 670     | 4/2/2015  | 34.20946 | -94.05049 | 63     | 85   | 1     | 28   | 0      | 157.02    | 5981.46 | 72.05      | 7.51  | 39.90 | 48.71 | 11.39 |                  |            |
| 80   | 80       | 671     | 4/2/2015  | 34.20946 | -94.05049 | 92     | 78   | 1     | 32   | 0      | 156.76    | 5982.48 | 76.85      | 7.17  | 39.90 | 48.71 | 11.39 |                  |            |
| 83   | 83       | 672     | 3/24/2015 | 34.59437 | -93.1265  | 0      | 100  | 0     | 32   | 0      | 231.91    | 6035.28 | 24.44      | 15.56 | 20.44 | 65.93 | 13.63 |                  |            |
| 83   | 83       | 673     | 3/24/2015 | 34.59437 | -93.1265  | 0      | 100  | 0     | 33   | 0      | 231.96    | 6033.42 | 28.75      | 8.95  | 20.44 | 65.93 | 13.63 |                  |            |

**Table C.1 cont'd**

| Site | Transect | Quadrat | Date      | Latitude | Longitude | Canopy | Herb | Sedge | Stem | Burrow | Elevation | Solar   | Water dist | CTI   | Sand  | Silt  | Clay  | Burrow ownership | Water trns |
|------|----------|---------|-----------|----------|-----------|--------|------|-------|------|--------|-----------|---------|------------|-------|-------|-------|-------|------------------|------------|
| 83   | 83       | 674     | 3/24/2015 | 34.59437 | -93.1265  | 0      | 100  | 0     | 56   | 0      | 232.02    | 6035.56 | 34.33      | 8.14  | 20.44 | 65.93 | 13.63 |                  |            |
| 83   | 83       | 675     | 3/24/2015 | 34.59437 | -93.1265  | 0      | 100  | 0     | 28   | 0      | 232.03    | 6035.43 | 40.39      | 9.53  | 20.44 | 65.93 | 13.63 |                  |            |
| 83   | 83       | 676     | 3/24/2015 | 34.59437 | -93.1265  | 0      | 100  | 39    | 0    | 0      | 232.06    | 6035.20 | 46.37      | 9.12  | 20.44 | 65.93 | 13.63 |                  |            |
| 83   | 83       | 677     | 3/24/2015 | 34.59437 | -93.1265  | 68     | 100  | 0     | 23   | 0      | 232.11    | 6035.26 | 51.93      | 8.52  | 20.44 | 65.93 | 13.63 |                  |            |
| 85   | 85       | 678     | 3/31/2015 | 34.63339 | -93.76313 | 0      | 45   | 1     | 3    | 0      | 197.95    | 6016.06 | 162.79     | 7.95  | 39.43 | 49.92 | 10.65 |                  |            |
| 85   | 85       | 679     | 3/31/2015 | 34.63339 | -93.76313 | 0      | 75   | 0     | 9    | 0      | 197.90    | 6015.49 | 158.45     | 7.53  | 39.43 | 49.92 | 10.65 |                  |            |
| 85   | 85       | 680     | 3/31/2015 | 34.63339 | -93.76313 | 0      | 85   | 1     | 14   | 0      | 197.77    | 6017.73 | 154.37     | 7.27  | 39.43 | 49.92 | 10.65 |                  |            |
| 85   | 85       | 681     | 3/31/2015 | 34.63339 | -93.76313 | 0      | 85   | 0     | 10   | 0      | 197.50    | 6017.66 | 150.83     | 8.01  | 39.43 | 49.92 | 10.65 |                  |            |
| 85   | 85       | 682     | 3/31/2015 | 34.63339 | -93.76313 | 0      | 80   | 0     | 6    | 0      | 197.37    | 6014.64 | 147.84     | 8.15  | 39.43 | 49.92 | 10.65 |                  |            |
| 85   | 85       | 683     | 3/31/2015 | 34.63339 | -93.76313 | 0      | 78   | 0     | 9    | 0      | 197.35    | 6014.82 | 145.52     | 8.17  | 39.43 | 49.92 | 10.65 |                  |            |
| 87   | 87       | 684     | 3/27/2015 | 34.1227  | -93.55003 | 0      | 90   | 0     | 7    | 3      | 174.79    | 5976.73 | 124.61     | 10.31 | 41.95 | 50.37 | 7.68  |                  |            |
| 87   | 87       | 685     | 3/27/2015 | 34.1227  | -93.55003 | 0      | 65   | 0     | 9    | 2      | 174.60    | 5978.47 | 120.92     | 11.15 | 41.95 | 50.37 | 7.68  |                  |            |
| 87   | 87       | 686     | 3/27/2015 | 34.1227  | -93.55003 | 0      | 15   | 0     | 8    | 2      | 174.55    | 5980.19 | 116.56     | 13.03 | 41.95 | 50.37 | 7.68  |                  |            |
| 87   | 87       | 687     | 3/27/2015 | 34.1227  | -93.55003 | 5      | 35   | 1     | 3    | 0      | 174.57    | 5980.46 | 111.19     | 12.29 | 41.95 | 50.37 | 7.68  |                  |            |
| 87   | 87       | 688     | 3/27/2015 | 34.1227  | -93.55003 | 0      | 45   | 1     | 9    | 0      | 174.65    | 5978.87 | 106.38     | 10.11 | 41.95 | 50.37 | 7.68  |                  |            |
| 87   | 87       | 689     | 3/27/2015 | 34.1227  | -93.55003 | 0      | 45   | 1     | 4    | 0      | 174.79    | 5969.52 | 102.07     | 6.39  | 41.95 | 50.37 | 7.68  |                  |            |
| 87   | 87       | 690     | 3/28/2015 | 34.36918 | -93.43809 | 45     | 80   | 0     | 26   | 0      | 191.20    | 6010.66 | 117.98     | 6.68  | 56.15 | 34.93 | 7.67  |                  |            |
| 87   | 87       | 691     | 3/28/2015 | 34.36918 | -93.43809 | 40     | 99   | 0     | 37   | 0      | 190.98    | 6005.44 | 108.44     | 6.54  | 56.15 | 34.93 | 7.67  |                  |            |
| 87   | 87       | 692     | 3/28/2015 | 34.36918 | -93.43809 | 32     | 95   | 0     | 19   | 0      | 189.33    | 6006.66 | 98.91      | 6.93  | 56.15 | 34.93 | 7.67  |                  |            |
| 87   | 87       | 693     | 3/28/2015 | 34.36918 | -93.43809 | 33     | 85   | 1     | 17   | 0      | 189.43    | 6007.89 | 89.37      | 6.64  | 56.15 | 34.93 | 7.67  |                  |            |
| 87   | 87       | 694     | 3/28/2015 | 34.36918 | -93.43809 | 28     | 85   | 0     | 7    | 0      | 189.39    | 6009.61 | 79.84      | 7.00  | 56.15 | 34.93 | 7.67  |                  |            |
| 87   | 87       | 695     | 3/28/2015 | 34.36918 | -93.43809 | 18     | 75   | 0     | 47   | 0      | 188.26    | 6013.01 | 70.30      | 6.74  | 56.15 | 34.93 | 7.67  |                  |            |
| 88   | 88       | 696     | 3/24/2015 | 34.45258 | -92.81526 | 0      | 75   | 0     | 27   | 0      | 184.63    | 5996.38 | 138.02     | 6.69  | 17.94 | 66.90 | 15.16 |                  |            |
| 88   | 88       | 697     | 3/24/2015 | 34.45258 | -92.81526 | 0      | 95   | 0     | 110  | 0      | 184.09    | 5985.61 | 146.54     | 8.25  | 17.94 | 66.90 | 15.16 |                  |            |
| 88   | 88       | 698     | 3/24/2015 | 34.45258 | -92.81526 | 0      | 100  | 0     | 27   | 0      | 183.34    | 5989.06 | 155.24     | 8.42  | 17.94 | 66.90 | 15.16 |                  |            |
| 88   | 88       | 699     | 3/24/2015 | 34.45258 | -92.81526 | 6      | 100  | 1     | 19   | 0      | 182.80    | 5991.87 | 164.10     | 8.93  | 17.94 | 66.90 | 15.16 |                  |            |
| 88   | 88       | 700     | 3/24/2015 | 34.45258 | -92.81526 | 24     | 95   | 1     | 32   | 0      | 182.01    | 5997.63 | 173.00     | 7.88  | 17.94 | 66.90 | 15.16 |                  |            |

**Table C.1 cont'd**

| Site | Transect | Quadrat | Date      | Latitude | Longitude | Canopy | Herb | Sedge | Stem | Burrow | Elevation | Solar   | Waterdist | CTI   | Sand  | Silt  | Clay  | Burrow ownership | Water trns |
|------|----------|---------|-----------|----------|-----------|--------|------|-------|------|--------|-----------|---------|-----------|-------|-------|-------|-------|------------------|------------|
| 88   | 88       | 701     | 3/24/2015 | 34.45258 | -92.81526 | 40     | 80   | 1     | 47   | 0      | 181.81    | 6005.45 | 182.09    | 8.84  | 17.94 | 66.90 | 15.16 |                  |            |
| 90   | 90       | 702     | 3/31/2015 | 34.25821 | -93.80802 | 0      | 90   | 0     | 22   | 1      | 214.38    | 6022.78 | 409.74    | 8.52  | 44.30 | 45.60 | 10.10 |                  |            |
| 90   | 90       | 703     | 3/31/2015 | 34.25821 | -93.80802 | 0      | 85   | 1     | 12   | 0      | 214.40    | 6024.58 | 405.60    | 8.74  | 44.30 | 45.60 | 10.10 |                  |            |
| 90   | 90       | 704     | 3/31/2015 | 34.25821 | -93.80802 | 0      | 78   | 1     | 9    | 0      | 214.36    | 6025.05 | 401.65    | 10.77 | 44.30 | 45.60 | 10.10 |                  |            |
| 90   | 90       | 705     | 3/31/2015 | 34.25821 | -93.80802 | 0      | 89   | 1     | 24   | 0      | 214.36    | 6024.83 | 398.02    | 8.35  | 44.30 | 45.60 | 10.10 |                  |            |
| 90   | 90       | 706     | 3/31/2015 | 34.25821 | -93.80802 | 0      | 80   | 1     | 20   | 0      | 214.31    | 6026.11 | 394.51    | 8.68  | 44.30 | 45.60 | 10.10 |                  |            |
| 90   | 90       | 707     | 3/31/2015 | 34.25821 | -93.80802 | 0      | 75   | 1     | 7    | 0      | 214.21    | 6029.53 | 391.25    | 7.96  | 44.30 | 45.60 | 10.10 |                  |            |
| 92   | 92       | 708     | 3/26/2015 | 34.30846 | -93.06246 | 50     | 80   | 1     | 79   | 3      | 153.03    | 5989.16 | 69.29     | 8.45  | 37.96 | 54.17 | 7.87  |                  |            |
| 92   | 92       | 709     | 3/26/2015 | 34.30846 | -93.06246 | 99     | 65   | 0     | 37   | 1      | 152.90    | 5987.67 | 65.34     | 8.06  | 37.96 | 54.17 | 7.87  |                  |            |
| 92   | 92       | 710     | 3/26/2015 | 34.30846 | -93.06246 | 0      | 15   | 0     | 7    | 0      | 153.04    | 5987.61 | 62.74     | 8.05  | 37.96 | 54.17 | 7.87  |                  |            |
| 92   | 92       | 711     | 3/26/2015 | 34.30846 | -93.06246 | 0      | 100  | 0     | 52   | 0      | 152.97    | 5988.56 | 61.67     | 7.73  | 37.96 | 54.17 | 7.87  |                  |            |
| 92   | 92       | 712     | 3/26/2015 | 34.30846 | -93.06246 | 0      | 100  | 0     | 37   | 0      | 152.80    | 5988.50 | 62.21     | 7.63  | 37.96 | 54.17 | 7.87  |                  |            |
| 92   | 92       | 713     | 3/26/2015 | 34.30846 | -93.06246 | 32     | 100  | 0     | 37   | 0      | 152.75    | 5986.78 | 64.31     | 8.35  | 37.96 | 54.17 | 7.87  |                  |            |
| 93   | 93       | 714     | 4/16/2015 | 34.58444 | -93.97827 | 0      | 90   | 0     | 18   | 0      | 261.47    | 6049.36 | 89.06     | 12.14 | 22.14 | 65.75 | 12.11 |                  |            |
| 93   | 93       | 715     | 4/16/2015 | 34.58444 | -93.97827 | 0      | 95   | 0     | 17   | 0      | 261.49    | 6048.92 | 99.04     | 10.83 | 22.14 | 65.75 | 12.11 |                  |            |
| 93   | 93       | 716     | 4/16/2015 | 34.58444 | -93.97827 | 0      | 97   | 0     | 18   | 0      | 261.67    | 6048.49 | 109.01    | 10.02 | 22.14 | 65.75 | 12.11 |                  |            |
| 93   | 93       | 717     | 4/16/2015 | 34.58444 | -93.97827 | 0      | 96   | 0     | 20   | 0      | 261.73    | 6047.83 | 118.99    | 9.87  | 22.14 | 65.75 | 12.11 |                  |            |
| 93   | 93       | 718     | 4/16/2015 | 34.58444 | -93.97827 | 0      | 85   | 1     | 21   | 0      | 261.93    | 6047.60 | 128.98    | 7.90  | 22.14 | 65.75 | 12.11 |                  |            |
| 93   | 93       | 719     | 4/16/2015 | 34.58444 | -93.97827 | 0      | 78   | 1     | 19   | 0      | 261.95    | 6046.36 | 138.96    | 8.13  | 22.14 | 65.75 | 12.11 |                  |            |
| 94   | 94       | 720     | 3/26/2015 | 34.31986 | -93.16096 | 24     | 70   | 0     | 3    | 2      | 167.44    | 5971.32 | 106.56    | 12.11 | 23.63 | 62.74 | 13.63 |                  |            |
| 94   | 94       | 721     | 3/26/2015 | 34.31986 | -93.16096 | 8      | 80   | 0     | 28   | 0      | 167.86    | 5933.07 | 116.47    | 7.45  | 23.63 | 62.74 | 13.63 |                  |            |
| 94   | 94       | 722     | 3/26/2015 | 34.31986 | -93.16096 | 42     | 80   | 0     | 12   | 0      | 169.23    | 5904.58 | 115.50    | 6.89  | 23.63 | 62.74 | 13.63 |                  |            |
| 94   | 94       | 723     | 3/26/2015 | 34.31986 | -93.16096 | 11     | 70   | 0     | 36   | 0      | 170.43    | 5940.31 | 109.66    | 6.96  | 23.63 | 62.74 | 13.63 |                  |            |
| 94   | 94       | 724     | 3/26/2015 | 34.31986 | -93.16096 | 22     | 75   | 0     | 46   | 0      | 170.89    | 5967.89 | 104.61    | 7.44  | 23.63 | 62.74 | 13.63 |                  |            |
| 94   | 94       | 725     | 3/26/2015 | 34.31986 | -93.16096 | 24     | 100  | 0     | 36   | 0      | 171.15    | 5969.93 | 100.30    | 7.06  | 23.63 | 62.74 | 13.63 |                  |            |
| 95   | 95       | 726     | 3/31/2015 | 34.6651  | -93.61877 | 44     | 65   | 0     | 22   | 0      | 213.94    | 6015.32 | 145.61    | 9.79  | 30.46 | 57.84 | 11.71 |                  |            |
| 95   | 95       | 727     | 3/31/2015 | 34.6651  | -93.61877 | 42     | 55   | 0     | 12   | 0      | 214.07    | 6015.99 | 147.06    | 8.45  | 30.46 | 57.84 | 11.71 |                  |            |

**Table C.1 cont'd**

| Site | Transect | Quadrat | Date      | Latitude | Longitude | Canopy | Herb | Sedge | Stem | Burrow | Elevation | Solar   | Waterdist | CTI   | Sand  | Silt  | Clay  | Burrow ownership | Water trns |
|------|----------|---------|-----------|----------|-----------|--------|------|-------|------|--------|-----------|---------|-----------|-------|-------|-------|-------|------------------|------------|
| 95   | 95       | 728     | 3/31/2015 | 34.6651  | -93.61877 | 22     | 30   | 0     | 10   | 0      | 214.13    | 6018.34 | 148.77    | 8.16  | 30.46 | 57.84 | 11.71 |                  |            |
| 95   | 95       | 729     | 3/31/2015 | 34.6651  | -93.61877 | 16     | 35   | 0     | 7    | 0      | 214.12    | 6019.26 | 149.88    | 9.09  | 30.46 | 57.84 | 11.71 |                  |            |
| 95   | 95       | 730     | 3/31/2015 | 34.6651  | -93.61877 | 25     | 40   | 0     | 9    | 0      | 214.12    | 6020.42 | 150.90    | 8.48  | 30.46 | 57.84 | 11.71 |                  |            |
| 95   | 95       | 731     | 3/31/2015 | 34.6651  | -93.61877 | 44     | 35   | 0     | 34   | 0      | 214.05    | 6020.80 | 151.84    | 11.60 | 30.46 | 57.84 | 11.71 |                  |            |
| 97   | 97       | 732     | 3/27/2015 | 34.15429 | -93.58212 | 24     | 55   | 0     | 1    | 1      | 159.06    | 5986.72 | 106.13    | 8.17  | 36.12 | 56.42 | 7.47  |                  |            |
| 97   | 97       | 733     | 3/27/2015 | 34.15429 | -93.58212 | 28     | 65   | 0     | 40   | 1      | 159.26    | 5988.10 | 106.21    | 8.43  | 36.12 | 56.42 | 7.47  |                  |            |
| 97   | 97       | 734     | 3/27/2015 | 34.15429 | -93.58212 | 52     | 65   | 0     | 37   | 1      | 159.22    | 5987.61 | 107.22    | 7.60  | 36.12 | 56.42 | 7.47  |                  |            |
| 97   | 97       | 735     | 3/27/2015 | 34.15429 | -93.58212 | 27     | 75   | 0     | 2    | 0      | 159.16    | 5987.12 | 108.53    | 8.58  | 36.12 | 56.42 | 7.47  |                  |            |
| 97   | 97       | 736     | 3/27/2015 | 34.15429 | -93.58212 | 76     | 30   | 0     | 0    | 0      | 159.09    | 5986.79 | 104.76    | 8.81  | 36.12 | 56.42 | 7.47  |                  |            |
| 97   | 97       | 737     | 3/27/2015 | 34.15429 | -93.58212 | 60     | 30   | 0     | 0    | 0      | 159.04    | 5986.36 | 101.37    | 7.74  | 36.12 | 56.42 | 7.47  |                  |            |
| 101  | 101      | 738     | 3/30/2015 | 34.86133 | -93.3456  | 32     | 15   | 0     | 3    | 0      | 194.78    | 6004.73 | 141.58    | 8.72  | 30.33 | 59.99 | 9.68  |                  |            |
| 101  | 101      | 739     | 3/30/2015 | 34.86133 | -93.3456  | 28     | 17   | 1     | 7    | 0      | 194.78    | 6004.73 | 134.41    | 8.72  | 30.33 | 59.99 | 9.68  |                  |            |
| 101  | 101      | 740     | 3/30/2015 | 34.86133 | -93.3456  | 94     | 20   | 1     | 35   | 0      | 194.76    | 6007.06 | 127.48    | 9.96  | 30.33 | 59.99 | 9.68  |                  |            |
| 101  | 101      | 741     | 3/30/2015 | 34.86133 | -93.3456  | 36     | 70   | 1     | 32   | 0      | 194.76    | 6007.06 | 121.06    | 9.96  | 30.33 | 59.99 | 9.68  |                  |            |
| 101  | 101      | 742     | 3/30/2015 | 34.86133 | -93.3456  | 49     | 18   | 1     | 2    | 0      | 194.73    | 6007.82 | 114.63    | 9.52  | 30.33 | 59.99 | 9.68  |                  |            |
| 101  | 101      | 743     | 3/30/2015 | 34.86133 | -93.3456  | 64     | 8    | 0     | 0    | 0      | 194.75    | 6001.92 | 108.26    | 9.02  | 30.33 | 59.99 | 9.68  |                  |            |
| 102  | 102      | 744     | 3/23/2015 | 34.65306 | -92.50546 | 79     | 3    | 1     | 2    | 0      | 156.80    | 5991.64 | 135.22    | 7.96  | 19.44 | 67.75 | 12.80 |                  |            |
| 102  | 102      | 745     | 3/23/2015 | 34.65306 | -92.50546 | 15     | 15   | 1     | 0    | 0      | 157.30    | 5993.49 | 125.33    | 6.67  | 19.44 | 67.75 | 12.80 |                  |            |
| 102  | 102      | 746     | 3/23/2015 | 34.65306 | -92.50546 | 13     | 18   | 1     | 2    | 0      | 157.40    | 5987.79 | 115.46    | 7.51  | 19.44 | 67.75 | 12.80 |                  |            |
| 102  | 102      | 747     | 3/23/2015 | 34.65306 | -92.50546 | 22     | 17   | 1     | 9    | 0      | 157.48    | 5986.97 | 105.63    | 8.16  | 19.44 | 67.75 | 12.80 |                  |            |
| 102  | 102      | 748     | 3/23/2015 | 34.65306 | -92.50546 | 24     | 90   | 1     | 34   | 0      | 157.48    | 5986.62 | 95.70     | 9.33  | 19.44 | 67.75 | 12.80 |                  |            |
| 102  | 102      | 749     | 3/23/2015 | 34.65306 | -92.50546 | 37     | 95   | 1     | 33   | 0      | 157.48    | 5984.93 | 85.94     | 7.00  | 19.44 | 67.75 | 12.80 |                  |            |
| 104  | 104      | 750     | 3/25/2015 | 34.64087 | -92.93977 | 0      | 90   | 1     | 22   | 0      | 175.24    | 6002.95 | 74.09     | 6.87  | 29.68 | 59.40 | 10.92 |                  |            |
| 104  | 104      | 751     | 3/25/2015 | 34.64087 | -92.93977 | 4      | 75   | 1     | 19   | 0      | 176.32    | 6007.61 | 84.05     | 6.75  | 29.68 | 59.40 | 10.92 |                  |            |
| 104  | 104      | 752     | 3/25/2015 | 34.64087 | -92.93977 | 72     | 90   | 1     | 16   | 0      | 176.44    | 5999.41 | 94.06     | 7.16  | 29.68 | 59.40 | 10.92 |                  |            |
| 104  | 104      | 753     | 3/25/2015 | 34.64087 | -92.93977 | 40     | 90   | 0     | 17   | 0      | 176.64    | 5996.12 | 104.03    | 7.88  | 29.68 | 59.40 | 10.92 |                  |            |
| 104  | 104      | 754     | 3/25/2015 | 34.64087 | -92.93977 | 8      | 65   | 0     | 26   | 0      | 175.95    | 5989.17 | 113.96    | 7.02  | 29.68 | 59.40 | 10.92 |                  |            |

**Table C.1 cont'd**

| Site | Transect | Quadrat | Date      | Latitude | Longitude | Canopy | Herb | Sedge | Stem | Burrow | Elevation | Solar   | Water dist | CTI  | Sand  | Silt  | Clay  | Burrow ownership | Water trns |
|------|----------|---------|-----------|----------|-----------|--------|------|-------|------|--------|-----------|---------|------------|------|-------|-------|-------|------------------|------------|
| 104  | 104      | 755     | 3/25/2015 | 34.64087 | -92.93977 | 0      | 100  | 0     | 27   | 0      | 176.03    | 5989.03 | 124.03     | 7.76 | 29.68 | 59.40 | 10.92 |                  |            |
| 109  | 109      | 756     | 4/1/2015  | 34.15819 | -93.89613 | 25     | 18   | 0     | 0    | 1      | 206.80    | 6012.68 | 401.59     | 6.73 | 69.01 | 27.73 | 3.26  |                  |            |
| 109  | 109      | 757     | 4/1/2015  | 34.15819 | -93.89613 | 6      | 45   | 1     | 0    | 0      | 207.08    | 6009.64 | 393.12     | 6.10 | 69.01 | 27.73 | 3.26  |                  |            |
| 109  | 109      | 758     | 4/1/2015  | 34.15819 | -93.89613 | 68     | 70   | 1     | 0    | 0      | 207.14    | 6004.54 | 384.77     | 7.58 | 69.01 | 27.73 | 3.26  |                  |            |
| 109  | 109      | 759     | 4/1/2015  | 34.15819 | -93.89613 | 45     | 30   | 0     | 0    | 0      | 207.08    | 6001.57 | 376.45     | 7.87 | 69.01 | 27.73 | 3.26  |                  |            |
| 109  | 109      | 760     | 4/1/2015  | 34.15819 | -93.89613 | 12     | 30   | 1     | 3    | 0      | 207.03    | 6009.04 | 368.27     | 9.77 | 69.01 | 27.73 | 3.26  |                  |            |
| 109  | 109      | 761     | 4/1/2015  | 34.15819 | -93.89613 | 91     | 25   | 1     | 7    | 0      | 207.22    | 6019.48 | 360.21     | 9.10 | 69.01 | 27.73 | 3.26  |                  |            |
| 111  | 111      | 762     | 3/26/2015 | 34.42896 | -93.28929 | 0      | 30   | 0     | 0    | 0      | 186.05    | 5993.48 | 230.75     | 7.13 | 39.91 | 49.27 | 10.83 |                  |            |
| 111  | 111      | 763     | 3/26/2015 | 34.42896 | -93.28929 | 0      | 75   | 1     | 5    | 0      | 186.55    | 5998.84 | 222.67     | 7.23 | 39.91 | 49.27 | 10.83 |                  |            |
| 111  | 111      | 764     | 3/26/2015 | 34.42896 | -93.28929 | 0      | 90   | 1     | 62   | 0      | 187.12    | 6003.36 | 214.79     | 5.51 | 39.91 | 49.27 | 10.83 |                  |            |
| 111  | 111      | 765     | 3/26/2015 | 34.42896 | -93.28929 | 0      | 90   | 1     | 0    | 0      | 186.05    | 5999.42 | 207.06     | 6.51 | 39.91 | 49.27 | 10.83 |                  |            |
| 111  | 111      | 766     | 3/26/2015 | 34.42896 | -93.28929 | 0      | 80   | 0     | 52   | 0      | 186.26    | 6002.58 | 199.52     | 7.11 | 39.91 | 49.27 | 10.83 |                  |            |
| 111  | 111      | 767     | 3/26/2015 | 34.42896 | -93.28929 | 0      | 100  | 1     | 54   | 0      | 186.66    | 6003.74 | 192.26     | 7.93 | 39.91 | 49.27 | 10.83 |                  |            |
| 112  | 112      | 768     | 4/3/2015  | 34.19992 | -94.26167 | 0      | 65   | 1     | 32   | 0      | 160.58    | 5980.97 | 63.86      | 8.43 | 32.42 | 55.98 | 11.60 |                  |            |
| 112  | 112      | 769     | 4/3/2015  | 34.19992 | -94.26167 | 0      | 90   | 0     | 29   | 0      | 160.96    | 5979.16 | 63.08      | 8.07 | 32.42 | 55.98 | 11.60 |                  |            |
| 112  | 112      | 770     | 4/3/2015  | 34.19992 | -94.26167 | 0      | 85   | 0     | 39   | 0      | 161.38    | 5977.52 | 63.75      | 8.89 | 32.42 | 55.98 | 11.60 |                  |            |
| 112  | 112      | 771     | 4/3/2015  | 34.19992 | -94.26167 | 0      | 95   | 0     | 32   | 0      | 161.87    | 5961.86 | 61.49      | 8.31 | 32.42 | 55.98 | 11.60 |                  |            |
| 112  | 112      | 772     | 4/3/2015  | 34.19992 | -94.26167 | 0      | 79   | 0     | 22   | 0      | 162.80    | 5956.22 | 60.02      | 8.15 | 32.42 | 55.98 | 11.60 |                  |            |
| 112  | 112      | 773     | 4/3/2015  | 34.19992 | -94.26167 | 0      | 80   | 1     | 30   | 0      | 163.70    | 5972.21 | 58.61      | 6.46 | 32.42 | 55.98 | 11.60 |                  |            |
| 117  | 117      | 774     | 4/3/2015  | 34.09761 | -94.46558 | 52     | 100  | 0     | 32   | 0      | 159.36    | 5978.63 | 689.92     | 8.33 | 35.22 | 53.75 | 11.03 |                  |            |
| 117  | 117      | 775     | 4/3/2015  | 34.09761 | -94.46558 | 32     | 90   | 0     | 29   | 0      | 158.97    | 5972.28 | 683.58     | 8.51 | 35.22 | 53.75 | 11.03 |                  |            |
| 117  | 117      | 776     | 4/3/2015  | 34.09761 | -94.46558 | 32     | 95   | 0     | 42   | 0      | 158.90    | 5972.29 | 677.26     | 6.74 | 35.22 | 53.75 | 11.03 |                  |            |
| 117  | 117      | 777     | 4/3/2015  | 34.09761 | -94.46558 | 5      | 98   | 1     | 70   | 0      | 158.62    | 5976.08 | 671.03     | 7.76 | 35.22 | 53.75 | 11.03 |                  |            |
| 117  | 117      | 778     | 4/3/2015  | 34.09761 | -94.46558 | 3      | 95   | 1     | 42   | 0      | 158.52    | 5979.40 | 664.72     | 9.49 | 35.22 | 53.75 | 11.03 |                  |            |
| 117  | 117      | 779     | 4/3/2015  | 34.09761 | -94.46558 | 20     | 88   | 1     | 20   | 0      | 158.52    | 5979.43 | 658.40     | 7.17 | 35.22 | 53.75 | 11.03 |                  |            |
| 118  | 118      | 780     | 3/31/2015 | 34.646   | -93.71104 | 66     | 15   | 0     | 10   | 0      | 221.08    | 6026.54 | 46.50      | 7.31 | 21.64 | 63.39 | 14.97 |                  |            |
| 118  | 118      | 781     | 3/31/2015 | 34.646   | -93.71104 | 99     | 5    | 0     | 3    | 0      | 221.25    | 6025.70 | 49.70      | 7.48 | 21.64 | 63.39 | 14.97 |                  |            |

**Table C.1 cont'd**

| Site | Transect | Quadrat | Date      | Latitude | Longitude | Canopy | Herb | Sedge | Stem | Burrow | Elevation | Solar   | Water dist | CTI  | Sand  | Silt  | Clay  | Burrow ownership | Water trns |
|------|----------|---------|-----------|----------|-----------|--------|------|-------|------|--------|-----------|---------|------------|------|-------|-------|-------|------------------|------------|
| 118  | 118      | 782     | 3/31/2015 | 34.646   | -93.71104 | 98     | 3    | 0     | 0    | 0      | 221.34    | 6026.21 | 54.48      | 7.66 | 21.64 | 63.39 | 14.97 |                  |            |
| 118  | 118      | 783     | 3/31/2015 | 34.646   | -93.71104 | 67     | 10   | 0     | 0    | 0      | 221.42    | 6026.88 | 60.62      | 7.32 | 21.64 | 63.39 | 14.97 |                  |            |
| 118  | 118      | 784     | 3/31/2015 | 34.646   | -93.71104 | 91     | 15   | 0     | 6    | 0      | 221.63    | 6027.60 | 67.61      | 6.86 | 21.64 | 63.39 | 14.97 |                  |            |
| 118  | 118      | 785     | 3/31/2015 | 34.646   | -93.71104 | 98     | 3    | 0     | 3    | 0      | 222.01    | 6028.77 | 75.35      | 6.65 | 21.64 | 63.39 | 14.97 |                  |            |
| 120  | 120      | 786     | 3/23/2015 | 34.74667 | -92.85654 | 28     | 45   | 1     | 7    | 1      | 177.04    | 6003.57 | 67.64      | 8.11 | 18.28 | 61.07 | 20.65 |                  |            |
| 120  | 120      | 787     | 3/23/2015 | 34.74667 | -92.85654 | 36     | 35   | 1     | 32   | 1      | 177.74    | 6004.33 | 71.67      | 7.97 | 18.28 | 61.07 | 20.65 |                  |            |
| 120  | 120      | 788     | 3/23/2015 | 34.74667 | -92.85654 | 32     | 90   | 0     | 37   | 0      | 178.51    | 6003.93 | 76.43      | 7.74 | 18.28 | 61.07 | 20.65 |                  |            |
| 120  | 120      | 789     | 3/23/2015 | 34.74667 | -92.85654 | 52     | 95   | 1     | 48   | 0      | 179.07    | 6004.52 | 79.82      | 7.64 | 18.28 | 61.07 | 20.65 |                  |            |
| 120  | 120      | 790     | 3/23/2015 | 34.74667 | -92.85654 | 20     | 70   | 1     | 28   | 0      | 179.81    | 6002.95 | 82.73      | 7.24 | 18.28 | 61.07 | 20.65 |                  |            |
| 120  | 120      | 791     | 3/23/2015 | 34.74667 | -92.85654 | 16     | 90   | 1     | 16   | 0      | 180.68    | 6003.31 | 85.53      | 6.91 | 18.28 | 61.07 | 20.65 |                  |            |
| 122  | 122      | 792     | 3/23/2015 | 34.87427 | -92.63171 | 0      | 100  | 0     | 32   | 0      | 101.15    | 5945.89 | 131.53     | 6.48 | 6.48  | 83.64 | 9.89  |                  |            |
| 122  | 122      | 793     | 3/23/2015 | 34.87427 | -92.63171 | 0      | 100  | 0     | 35   | 0      | 101.83    | 5943.45 | 141.48     | 6.39 | 6.48  | 83.64 | 9.89  |                  |            |
| 122  | 122      | 794     | 3/23/2015 | 34.87427 | -92.63171 | 0      | 100  | 1     | 22   | 0      | 102.25    | 5944.48 | 151.43     | 6.54 | 6.48  | 83.64 | 9.89  |                  |            |
| 122  | 122      | 795     | 3/23/2015 | 34.87427 | -92.63171 | 0      | 100  | 0     | 60   | 0      | 103.28    | 5946.37 | 161.46     | 6.34 | 6.48  | 83.64 | 9.89  |                  |            |
| 122  | 122      | 796     | 3/23/2015 | 34.87427 | -92.63171 | 0      | 100  | 0     | 39   | 0      | 103.74    | 5941.17 | 171.41     | 6.31 | 6.48  | 83.64 | 9.89  |                  |            |
| 122  | 122      | 797     | 3/23/2015 | 34.87427 | -92.63171 | 76     | 100  | 0     | 66   | 0      | 104.18    | 5909.96 | 181.36     | 9.88 | 6.48  | 83.64 | 9.89  |                  |            |
| 125  | 125      | 798     | 3/29/2015 | 34.31173 | -93.67787 | 24     | 0    | 0     | 0    | 0      | 262.93    | 6059.46 | 150.24     | 6.93 | 35.57 | 51.99 | 12.44 |                  |            |
| 125  | 125      | 799     | 3/29/2015 | 34.31173 | -93.67787 | 26     | 35   | 0     | 5    | 0      | 262.62    | 6060.30 | 148.22     | 6.78 | 35.57 | 51.99 | 12.44 |                  |            |
| 125  | 125      | 800     | 3/29/2015 | 34.31173 | -93.67787 | 48     | 3    | 0     | 0    | 0      | 262.30    | 6062.24 | 146.93     | 6.26 | 35.57 | 51.99 | 12.44 |                  |            |
| 125  | 125      | 801     | 3/29/2015 | 34.31173 | -93.67787 | 10     | 80   | 0     | 11   | 0      | 261.56    | 6060.60 | 146.19     | 7.95 | 35.57 | 51.99 | 12.44 |                  |            |
| 125  | 125      | 802     | 3/29/2015 | 34.31173 | -93.67787 | 41     | 20   | 0     | 3    | 0      | 261.56    | 6060.60 | 146.26     | 7.95 | 35.57 | 51.99 | 12.44 |                  |            |
| 125  | 125      | 803     | 3/29/2015 | 34.31173 | -93.67787 | 30     | 15   | 0     | 2    | 0      | 260.60    | 6053.77 | 146.92     | 7.80 | 35.57 | 51.99 | 12.44 |                  |            |
| 128  | 128      | 804     | 4/2/2015  | 34.26218 | -93.95017 | 0      | 45   | 0     | 42   | 0      | 248.84    | 5973.12 | 42.88      | 5.59 | 37.65 | 53.37 | 8.98  |                  |            |
| 128  | 128      | 805     | 4/2/2015  | 34.26218 | -93.95017 | 19     | 80   | 1     | 13   | 0      | 248.24    | 5985.35 | 46.66      | 8.07 | 37.65 | 53.37 | 8.98  |                  |            |
| 128  | 128      | 806     | 4/2/2015  | 34.26218 | -93.95017 | 0      | 85   | 1     | 33   | 0      | 248.61    | 5994.62 | 51.93      | 5.89 | 37.65 | 53.37 | 8.98  |                  |            |
| 128  | 128      | 807     | 4/2/2015  | 34.26218 | -93.95017 | 0      | 70   | 1     | 25   | 0      | 248.90    | 6000.21 | 57.61      | 8.27 | 37.65 | 53.37 | 8.98  |                  |            |
| 128  | 128      | 808     | 4/2/2015  | 34.26218 | -93.95017 | 0      | 85   | 1     | 23   | 0      | 248.71    | 6009.19 | 64.24      | 6.15 | 37.65 | 53.37 | 8.98  |                  |            |



**Table C.1 cont'd**

| Site | Transect | Quadrat | Date      | Latitude | Longitude | Canopy | Herb | Sedge | Stem | Burrow | Elevation | Solar   | Water dist | CTI   | Sand  | Silt  | Clay  | Burrow ownership | Water trns |
|------|----------|---------|-----------|----------|-----------|--------|------|-------|------|--------|-----------|---------|------------|-------|-------|-------|-------|------------------|------------|
| 128  | 128      | 809     | 4/2/2015  | 34.26218 | -93.95017 | 24     | 65   | 1     | 12   | 0      | 248.87    | 6013.06 | 71.54      | 8.25  | 37.65 | 53.37 | 8.98  |                  |            |
| 132  | 132      | 810     | 3/29/2015 | 34.26529 | -93.47874 | 13     | 80   | 1     | 68   | 0      | 142.72    | 5978.30 | 138.73     | 9.93  | 30.56 | 58.63 | 10.81 |                  |            |
| 132  | 132      | 811     | 3/29/2015 | 34.26529 | -93.47874 | 25     | 99   | 0     | 32   | 0      | 142.89    | 5976.37 | 148.62     | 10.36 | 30.56 | 58.63 | 10.81 |                  |            |
| 132  | 132      | 812     | 3/29/2015 | 34.26529 | -93.47874 | 26     | 85   | 0     | 22   | 0      | 143.08    | 5969.68 | 158.42     | 9.08  | 30.56 | 58.63 | 10.81 |                  |            |
| 132  | 132      | 813     | 3/29/2015 | 34.26529 | -93.47874 | 58     | 99   | 0     | 22   | 0      | 143.90    | 5971.36 | 168.34     | 8.83  | 30.56 | 58.63 | 10.81 |                  |            |
| 132  | 132      | 814     | 3/29/2015 | 34.26529 | -93.47874 | 75     | 90   | 1     | 47   | 0      | 144.28    | 5974.32 | 176.86     | 8.61  | 30.56 | 58.63 | 10.81 |                  |            |
| 132  | 132      | 815     | 3/29/2015 | 34.26529 | -93.47874 | 50     | 99   | 1     | 48   | 0      | 145.09    | 5980.38 | 185.26     | 6.87  | 30.56 | 58.63 | 10.81 |                  |            |
| 133  | 133      | 816     | 4/2/2015  | 34.31225 | -94.13503 | 23     | 2    | 0     | 0    | 0      | 275.09    | 6010.90 | 336.35     | 7.27  | 36.92 | 49.99 | 13.08 |                  |            |
| 133  | 133      | 817     | 4/2/2015  | 34.31225 | -94.13503 | 0      | 0    | 0     | 0    | 0      | 275.92    | 6041.97 | 339.25     | 6.50  | 36.92 | 49.99 | 13.08 |                  |            |
| 133  | 133      | 818     | 4/2/2015  | 34.31225 | -94.13503 | 2      | 5    | 0     | 0    | 0      | 275.83    | 6061.12 | 342.36     | 7.92  | 36.92 | 49.99 | 13.08 |                  |            |
| 133  | 133      | 819     | 4/2/2015  | 34.31225 | -94.13503 | 43     | 15   | 0     | 3    | 0      | 275.89    | 6066.14 | 345.78     | 7.94  | 36.92 | 49.99 | 13.08 |                  |            |
| 133  | 133      | 820     | 4/2/2015  | 34.31225 | -94.13503 | 0      | 88   | 0     | 21   | 0      | 275.61    | 6070.73 | 349.50     | 7.26  | 36.92 | 49.99 | 13.08 |                  |            |
| 133  | 133      | 821     | 4/2/2015  | 34.31225 | -94.13503 | 0      | 95   | 0     | 37   | 0      | 275.36    | 6071.35 | 353.42     | 7.00  | 36.92 | 49.99 | 13.08 |                  |            |
| 134  | 134      | 822     | 4/3/2015  | 34.29995 | -94.14393 | 16     | 20   | 1     | 9    | 1      | 222.23    | 5955.91 | 352.45     | 7.91  | 36.92 | 49.99 | 13.08 |                  |            |
| 134  | 134      | 823     | 4/3/2015  | 34.29995 | -94.14393 | 32     | 60   | 1     | 13   | 1      | 221.90    | 5925.54 | 361.75     | 5.51  | 36.92 | 49.99 | 13.08 |                  |            |
| 134  | 134      | 824     | 4/3/2015  | 34.29995 | -94.14393 | 2      | 65   | 0     | 29   | 0      | 221.02    | 5883.19 | 371.18     | 6.36  | 36.92 | 49.99 | 13.08 |                  |            |
| 134  | 134      | 825     | 4/3/2015  | 34.29995 | -94.14393 | 48     | 35   | 0     | 7    | 0      | 219.62    | 5964.49 | 380.55     | 6.02  | 36.92 | 49.99 | 13.08 |                  |            |
| 134  | 134      | 826     | 4/3/2015  | 34.29995 | -94.14393 | 25     | 78   | 1     | 7    | 0      | 219.02    | 5960.58 | 386.23     | 9.27  | 36.92 | 49.99 | 13.08 |                  |            |
| 134  | 134      | 827     | 4/3/2015  | 34.29995 | -94.14393 | 0      | 20   | 0     | 0    | 0      | 218.68    | 5988.61 | 378.76     | 10.28 | 36.92 | 49.99 | 13.08 |                  |            |
| 136  | 136      | 828     | 3/30/2015 | 34.85619 | -93.82548 | 16     | 30   | 0     | 2    | 0      | 203.44    | 5992.63 | 156.44     | 5.46  | 14.22 | 72.57 | 13.21 |                  |            |
| 136  | 136      | 829     | 3/30/2015 | 34.85619 | -93.82548 | 22     | 70   | 0     | 4    | 0      | 202.30    | 5986.73 | 160.08     | 8.56  | 14.22 | 72.57 | 13.21 |                  |            |
| 136  | 136      | 830     | 3/30/2015 | 34.85619 | -93.82548 | 8      | 25   | 0     | 12   | 0      | 200.77    | 5988.71 | 162.86     | 8.69  | 14.22 | 72.57 | 13.21 |                  |            |
| 136  | 136      | 831     | 3/30/2015 | 34.85619 | -93.82548 | 14     | 20   | 0     | 0    | 0      | 201.07    | 5971.50 | 164.17     | 8.55  | 14.22 | 72.57 | 13.21 |                  |            |
| 136  | 136      | 832     | 3/30/2015 | 34.85619 | -93.82548 | 32     | 70   | 1     | 20   | 0      | 199.91    | 5991.65 | 165.47     | 10.98 | 14.22 | 72.57 | 13.21 |                  |            |
| 136  | 136      | 833     | 3/30/2015 | 34.85619 | -93.82548 | 8      | 65   | 1     | 27   | 0      | 200.86    | 5984.05 | 166.78     | 5.55  | 14.22 | 72.57 | 13.21 |                  |            |
| 137  | 137      | 834     | 4/3/2015  | 34.23858 | -94.08827 | 52     | 88   | 0     | 8    | 0      | 226.23    | 6023.98 | 278.28     | 6.07  | 20.41 | 64.93 | 14.66 |                  |            |
| 137  | 137      | 835     | 4/3/2015  | 34.23858 | -94.08827 | 62     | 85   | 0     | 32   | 0      | 227.76    | 6036.55 | 274.63     | 5.73  | 20.41 | 64.93 | 14.66 |                  |            |

**Table C.1 cont'd**

| Site | Transect | Quadrat | Date      | Latitude | Longitude | Canopy | Herb | Sedge | Stem | Burrow | Elevation | Solar   | Water.dist | CTI   | Sand  | Silt  | Clay  | Burrow ownership | Water trns |
|------|----------|---------|-----------|----------|-----------|--------|------|-------|------|--------|-----------|---------|------------|-------|-------|-------|-------|------------------|------------|
| 137  | 137      | 836     | 4/3/2015  | 34.23858 | -94.08827 | 2      | 90   | 0     | 42   | 0      | 227.57    | 6035.04 | 271.41     | 5.65  | 20.41 | 64.93 | 14.66 |                  |            |
| 137  | 137      | 837     | 4/3/2015  | 34.23858 | -94.08827 | 0      | 95   | 0     | 27   | 0      | 227.57    | 6037.57 | 268.41     | 9.72  | 20.41 | 64.93 | 14.66 |                  |            |
| 137  | 137      | 838     | 4/3/2015  | 34.23858 | -94.08827 | 76     | 65   | 0     | 47   | 0      | 227.41    | 6037.59 | 265.87     | 9.83  | 20.41 | 64.93 | 14.66 |                  |            |
| 137  | 137      | 839     | 4/3/2015  | 34.23858 | -94.08827 | 38     | 55   | 0     | 9    | 0      | 228.75    | 6030.41 | 263.20     | 7.24  | 20.41 | 64.93 | 14.66 |                  |            |
| 138  | 138      | 840     | 4/3/2015  | 34.07553 | -94.46408 | 40     | 55   | 0     | 12   | 0      | 130.71    | 5962.98 | 199.68     | 8.35  | 35.22 | 53.75 | 11.03 |                  |            |
| 138  | 138      | 841     | 4/3/2015  | 34.07553 | -94.46408 | 36     | 85   | 0     | 12   | 0      | 130.89    | 5961.46 | 199.20     | 8.49  | 35.22 | 53.75 | 11.03 |                  |            |
| 138  | 138      | 842     | 4/3/2015  | 34.07553 | -94.46408 | 68     | 20   | 0     | 7    | 0      | 130.81    | 5958.42 | 198.71     | 6.86  | 35.22 | 53.75 | 11.03 |                  |            |
| 138  | 138      | 843     | 4/3/2015  | 34.07553 | -94.46408 | 28     | 85   | 1     | 28   | 0      | 131.09    | 5959.74 | 198.23     | 8.35  | 35.22 | 53.75 | 11.03 |                  |            |
| 138  | 138      | 844     | 4/3/2015  | 34.07553 | -94.46408 | 48     | 90   | 1     | 25   | 0      | 131.31    | 5958.40 | 197.67     | 8.48  | 35.22 | 53.75 | 11.03 |                  |            |
| 138  | 138      | 845     | 4/3/2015  | 34.07553 | -94.46408 | 82     | 90   | 1     | 36   | 0      | 131.20    | 5952.30 | 197.19     | 6.46  | 35.22 | 53.75 | 11.03 |                  |            |
| 139  | 139      | 846     | 4/2/2015  | 34.31769 | -94.05876 | 0      | 20   | 0     | 0    | 0      | 279.26    | 6055.71 | 567.72     | 9.39  | 30.55 | 59.51 | 9.94  |                  |            |
| 139  | 139      | 847     | 4/2/2015  | 34.31769 | -94.05876 | 2      | 25   | 0     | 11   | 0      | 279.32    | 6055.30 | 572.91     | 14.10 | 30.55 | 59.51 | 9.94  |                  |            |
| 139  | 139      | 848     | 4/2/2015  | 34.31769 | -94.05876 | 0      | 0    | 0     | 0    | 0      | 279.64    | 6046.50 | 578.12     | 6.82  | 30.55 | 59.51 | 9.94  |                  |            |
| 139  | 139      | 849     | 4/2/2015  | 34.31769 | -94.05876 | 12     | 5    | 0     | 11   | 0      | 279.64    | 6046.50 | 583.56     | 6.82  | 30.55 | 59.51 | 9.94  |                  |            |
| 139  | 139      | 850     | 4/2/2015  | 34.31769 | -94.05876 | 0      | 8    | 1     | 12   | 0      | 280.24    | 6045.67 | 589.13     | 7.43  | 30.55 | 59.51 | 9.94  |                  |            |
| 139  | 139      | 851     | 4/2/2015  | 34.31769 | -94.05876 | 0      | 7    | 0     | 3    | 0      | 280.39    | 6043.50 | 594.69     | 6.68  | 30.55 | 59.51 | 9.94  |                  |            |
| 140  | 140      | 852     | 4/1/2015  | 34.1141  | -93.83714 | 0      | 98   | 1     | 42   | 0      | 147.22    | 5988.63 | 227.48     | 6.94  | 20.46 | 71.47 | 8.07  |                  |            |
| 140  | 140      | 853     | 4/1/2015  | 34.1141  | -93.83714 | 0      | 80   | 0     | 27   | 0      | 147.01    | 5988.84 | 237.37     | 8.51  | 20.46 | 71.47 | 8.07  |                  |            |
| 140  | 140      | 854     | 4/1/2015  | 34.1141  | -93.83714 | 0      | 85   | 0     | 14   | 0      | 146.64    | 5984.48 | 247.37     | 6.90  | 20.46 | 71.47 | 8.07  |                  |            |
| 140  | 140      | 855     | 4/1/2015  | 34.1141  | -93.83714 | 28     | 65   | 1     | 16   | 0      | 146.12    | 5978.75 | 257.27     | 6.70  | 20.46 | 71.47 | 8.07  |                  |            |
| 140  | 140      | 856     | 4/1/2015  | 34.1141  | -93.83714 | 66     | 57   | 0     | 4    | 0      | 145.37    | 5971.65 | 267.27     | 6.56  | 20.46 | 71.47 | 8.07  |                  |            |
| 140  | 140      | 857     | 4/1/2015  | 34.1141  | -93.83714 | 18     | 87   | 1     | 35   | 0      | 144.56    | 5964.76 | 277.20     | 7.15  | 20.46 | 71.47 | 8.07  |                  |            |
| 142  | 142      | 858     | 4/12/2015 | 34.48577 | -93.8707  | 80     | 35   | 1     | 2    | 0      | 330.55    | 6082.79 | 158.68     | 6.90  | 14.56 | 70.84 | 14.61 |                  |            |
| 142  | 142      | 859     | 4/12/2015 | 34.48577 | -93.8707  | 65     | 15   | 1     | 0    | 0      | 330.32    | 6084.97 | 153.24     | 7.21  | 14.56 | 70.84 | 14.61 |                  |            |
| 142  | 142      | 860     | 4/12/2015 | 34.48577 | -93.8707  | 50     | 65   | 1     | 6    | 0      | 330.19    | 6086.60 | 145.23     | 7.48  | 14.56 | 70.84 | 14.61 |                  |            |
| 142  | 142      | 861     | 4/12/2015 | 34.48577 | -93.8707  | 40     | 85   | 0     | 27   | 0      | 330.09    | 6086.05 | 137.39     | 7.51  | 14.56 | 70.84 | 14.61 |                  |            |
| 142  | 142      | 862     | 4/12/2015 | 34.48577 | -93.8707  | 30     | 95   | 0     | 30   | 0      | 329.82    | 6082.85 | 129.85     | 7.85  | 14.56 | 70.84 | 14.61 |                  |            |

**Table C.1 cont'd**

| Site | Transect | Quadrat | Date      | Latitude | Longitude | Canopy | Herb | Sedge | Stem | Burrow | Elevation | Solar   | Water dist | CTI   | Sand  | Silt  | Clay  | Burrow ownership | Watertrns |
|------|----------|---------|-----------|----------|-----------|--------|------|-------|------|--------|-----------|---------|------------|-------|-------|-------|-------|------------------|-----------|
| 142  | 142      | 863     | 4/12/2015 | 34.48577 | -93.8707  | 47     | 65   | 0     | 16   | 0      | 329.57    | 6082.22 | 122.74     | 7.08  | 14.56 | 70.84 | 14.61 |                  |           |
| 143  | 143      | 864     | 3/29/2015 | 34.30464 | -93.39529 | 44     | 78   | 0     | 20   | 0      | 157.03    | 5992.37 | 141.38     | 6.83  | 41.52 | 49.43 | 9.05  |                  |           |
| 143  | 143      | 865     | 3/29/2015 | 34.30464 | -93.39529 | 78     | 55   | 0     | 14   | 0      | 157.03    | 5992.37 | 144.72     | 6.83  | 41.52 | 49.43 | 9.05  |                  |           |
| 143  | 143      | 866     | 3/29/2015 | 34.30464 | -93.39529 | 75     | 56   | 0     | 28   | 0      | 156.68    | 5992.18 | 148.24     | 6.53  | 41.52 | 49.43 | 9.05  |                  |           |
| 143  | 143      | 867     | 3/29/2015 | 34.30464 | -93.39529 | 55     | 20   | 0     | 7    | 0      | 156.86    | 5991.67 | 151.89     | 7.75  | 41.52 | 49.43 | 9.05  |                  |           |
| 143  | 143      | 868     | 3/29/2015 | 34.30464 | -93.39529 | 57     | 15   | 0     | 8    | 0      | 157.11    | 5992.14 | 155.91     | 6.50  | 41.52 | 49.43 | 9.05  |                  |           |
| 143  | 143      | 869     | 3/29/2015 | 34.30464 | -93.39529 | 84     | 30   | 0     | 12   | 0      | 156.10    | 5990.17 | 159.98     | 7.89  | 41.52 | 49.43 | 9.05  |                  |           |
| 146  | 146      | 870     | 4/9/2015  | 34.59105 | -94.36073 | 0      | 80   | 1     | 28   | 0      | 321.98    | 6096.20 | 345.48     | 7.13  | 40.99 | 47.79 | 11.21 |                  |           |
| 146  | 146      | 871     | 4/9/2015  | 34.59105 | -94.36073 | 0      | 95   | 1     | 17   | 0      | 322.05    | 6096.51 | 342.46     | 8.66  | 40.99 | 47.79 | 11.21 |                  |           |
| 146  | 146      | 872     | 4/9/2015  | 34.59105 | -94.36073 | 0      | 90   | 0     | 33   | 0      | 322.05    | 6096.33 | 339.58     | 8.91  | 40.99 | 47.79 | 11.21 |                  |           |
| 146  | 146      | 873     | 4/9/2015  | 34.59105 | -94.36073 | 0      | 70   | 0     | 22   | 0      | 322.12    | 6096.17 | 336.64     | 9.56  | 40.99 | 47.79 | 11.21 |                  |           |
| 146  | 146      | 874     | 4/9/2015  | 34.59105 | -94.36073 | 0      | 85   | 0     | 19   | 0      | 322.20    | 6096.02 | 334.08     | 9.19  | 40.99 | 47.79 | 11.21 |                  |           |
| 146  | 146      | 875     | 4/9/2015  | 34.59105 | -94.36073 | 0      | 65   | 0     | 17   | 0      | 322.29    | 6095.21 | 331.69     | 9.59  | 40.99 | 47.79 | 11.21 |                  |           |
| 148  | 148      | 876     | 3/27/2015 | 34.15646 | -93.27261 | 0      | 35   | 0     | 4    | 0      | 140.15    | 5973.27 | 336.14     | 8.72  | 42.49 | 50.46 | 7.05  |                  |           |
| 148  | 148      | 877     | 3/27/2015 | 34.15646 | -93.27261 | 32     | 45   | 0     | 27   | 0      | 139.79    | 5972.44 | 331.73     | 6.46  | 42.49 | 50.46 | 7.05  |                  |           |
| 148  | 148      | 878     | 3/27/2015 | 34.15646 | -93.27261 | 60     | 15   | 0     | 0    | 0      | 139.23    | 5965.52 | 327.57     | 7.57  | 42.49 | 50.46 | 7.05  |                  |           |
| 148  | 148      | 879     | 3/27/2015 | 34.15646 | -93.27261 | 40     | 30   | 0     | 2    | 0      | 138.50    | 5967.37 | 323.67     | 7.82  | 42.49 | 50.46 | 7.05  |                  |           |
| 148  | 148      | 880     | 3/27/2015 | 34.15646 | -93.27261 | 68     | 5    | 0     | 0    | 0      | 138.03    | 5972.65 | 319.98     | 8.20  | 42.49 | 50.46 | 7.05  |                  |           |
| 148  | 148      | 881     | 3/27/2015 | 34.15646 | -93.27261 | 80     | 5    | 0     | 0    | 0      | 137.42    | 5977.41 | 316.61     | 13.41 | 42.49 | 50.46 | 7.05  |                  |           |
| 149  | 149      | 882     | 3/24/2015 | 34.53686 | -92.68876 | 0      | 90   | 0     | 24   | 0      | 139.90    | 5966.85 | 180.83     | 6.07  | 29.23 | 61.50 | 9.26  |                  |           |
| 149  | 149      | 883     | 3/24/2015 | 34.53686 | -92.68876 | 0      | 100  | 0     | 54   | 0      | 139.28    | 5958.41 | 184.28     | 5.95  | 29.23 | 61.50 | 9.26  |                  |           |
| 149  | 149      | 884     | 3/24/2015 | 34.53686 | -92.68876 | 0      | 100  | 0     | 46   | 0      | 139.28    | 5958.41 | 188.12     | 5.95  | 29.23 | 61.50 | 9.26  |                  |           |
| 149  | 149      | 885     | 3/24/2015 | 34.53686 | -92.68876 | 0      | 100  | 0     | 38   | 0      | 138.64    | 5942.94 | 192.42     | 6.64  | 29.23 | 61.50 | 9.26  |                  |           |
| 149  | 149      | 886     | 3/24/2015 | 34.53686 | -92.68876 | 0      | 100  | 0     | 21   | 0      | 137.71    | 5913.38 | 197.11     | 6.46  | 29.23 | 61.50 | 9.26  |                  |           |
| 149  | 149      | 887     | 3/24/2015 | 34.53686 | -92.68876 | 0      | 100  | 0     | 61   | 0      | 135.72    | 5898.00 | 202.22     | 8.89  | 29.23 | 61.50 | 9.26  |                  |           |
| 150  | 150      | 888     | 3/25/2015 | 34.69566 | -92.97722 | 84     | 15   | 1     | 0    | 0      | 195.90    | 5954.82 | 117.59     | 6.72  | 28.35 | 52.90 | 18.75 |                  |           |

**Table C.1 cont'd**

| Site | Transect | Quadrat | Date      | Latitude  | Longitude | Canopy | Herb | Sedge | Stem | Burrow | Elevation | Solar   | Water dist | CTI  | Sand  | Silt  | Clay  | Burrow ownership | Watertrns |
|------|----------|---------|-----------|-----------|-----------|--------|------|-------|------|--------|-----------|---------|------------|------|-------|-------|-------|------------------|-----------|
| 150  | 150      | 889     | 3/25/2015 | 34.69566  | -92.97722 | 55     | 8    | 0     | 0    | 0      | 194.81    | 5840.70 | 119.83     | 6.73 | 28.35 | 52.90 | 18.75 |                  |           |
| 150  | 150      | 890     | 3/25/2015 | 34.69566  | -92.97722 | 88     | 15   | 0     | 2    | 0      | 194.87    | 5814.70 | 122.90     | 5.80 | 28.35 | 52.90 | 18.75 |                  |           |
| 150  | 150      | 891     | 3/25/2015 | 34.69566  | -92.97722 | 76     | 5    | 0     | 0    | 0      | 194.58    | 5830.99 | 126.55     | 4.72 | 28.35 | 52.90 | 18.75 |                  |           |
| 150  | 150      | 892     | 3/25/2015 | 34.69566  | -92.97722 | 82     | 5    | 0     | 15   | 0      | 190.01    | 5818.43 | 131.01     | 5.84 | 28.35 | 52.90 | 18.75 |                  |           |
| 150  | 150      | 893     | 3/25/2015 | 34.69566  | -92.97722 | 68     | 3    | 1     | 0    | 0      | 188.94    | 5822.54 | 135.97     | 8.06 | 28.35 | 52.90 | 18.75 |                  |           |
| 154  | 154      | 894     | 3/25/2015 | 34.64.829 | -92.95192 | 76     | 58   | 0     | 98   | 0      | 226.60    | 5978.55 | 438.85     | 7.59 | 29.68 | 59.40 | 10.92 |                  |           |
| 154  | 154      | 895     | 3/25/2015 | 34.64.829 | -92.95192 | 62     | 90   | 1     | 66   | 0      | 227.31    | 5980.47 | 432.29     | 7.17 | 29.68 | 59.40 | 10.92 |                  |           |
| 154  | 154      | 896     | 3/25/2015 | 34.64.829 | -92.95192 | 56     | 85   | 1     | 47   | 0      | 227.90    | 5972.09 | 425.73     | 7.31 | 29.68 | 59.40 | 10.92 |                  |           |
| 154  | 154      | 897     | 3/25/2015 | 34.64.829 | -92.95192 | 68     | 55   | 1     | 17   | 0      | 229.41    | 5964.91 | 419.44     | 6.98 | 29.68 | 59.40 | 10.92 |                  |           |
| 154  | 154      | 898     | 3/25/2015 | 34.64.829 | -92.95192 | 68     | 15   | 0     | 7    | 0      | 230.03    | 5946.68 | 413.16     | 6.12 | 29.68 | 59.40 | 10.92 |                  |           |
| 154  | 154      | 899     | 3/25/2015 | 34.64.829 | -92.95192 | 72     | 15   | 1     | 6    | 0      | 232.06    | 5969.51 | 407.16     | 5.61 | 29.68 | 59.40 | 10.92 |                  |           |
| 156  | 156      | 900     | 3/27/2015 | 34.12791  | -93.32538 | 20     | 65   | 0     | 9    | 0      | 104.60    | 5956.59 | 85.90      | 8.44 | 46.96 | 45.42 | 7.62  |                  |           |
| 156  | 156      | 901     | 3/27/2015 | 34.12791  | -93.32538 | 12     | 35   | 0     | 3    | 0      | 104.59    | 5955.92 | 75.88      | 6.75 | 46.96 | 45.42 | 7.62  |                  |           |
| 156  | 156      | 902     | 3/27/2015 | 34.12791  | -93.32538 | 20     | 65   | 0     | 23   | 0      | 104.43    | 5952.14 | 65.95      | 8.36 | 46.96 | 45.42 | 7.62  |                  |           |
| 156  | 156      | 903     | 3/27/2015 | 34.12791  | -93.32538 | 80     | 5    | 0     | 3    | 0      | 103.79    | 5944.02 | 56.03      | 8.64 | 46.96 | 45.42 | 7.62  |                  |           |
| 156  | 156      | 904     | 3/27/2015 | 34.12791  | -93.32538 | 68     | 3    | 0     | 1    | 0      | 103.22    | 5926.52 | 46.01      | 6.29 | 46.96 | 45.42 | 7.62  |                  |           |
| 156  | 156      | 905     | 3/27/2015 | 34.12791  | -93.32538 | 100    | 2    | 0     | 0    | 0      | 101.89    | 5873.00 | 36.08      | 5.82 | 46.96 | 45.42 | 7.62  |                  |           |
| 159  | 159      | 906     | 3/24/2015 | 34.57591  | -92.98907 | 96     | 5    | 0     | 0    | 0      | 206.90    | 5845.52 | 313.55     | 5.74 | 10.29 | 74.76 | 14.95 |                  |           |
| 159  | 159      | 907     | 3/24/2015 | 34.57591  | -92.98907 | 62     | 2    | 0     | 0    | 0      | 206.24    | 5814.19 | 306.15     | 5.63 | 10.29 | 74.76 | 14.95 |                  |           |
| 159  | 159      | 908     | 3/24/2015 | 34.57591  | -92.98907 | 60     | 3    | 0     | 0    | 0      | 205.85    | 5776.71 | 298.91     | 5.53 | 10.29 | 74.76 | 14.95 |                  |           |
| 159  | 159      | 909     | 3/24/2015 | 34.57591  | -92.98907 | 76     | 2    | 0     | 0    | 0      | 205.82    | 5761.93 | 291.83     | 5.49 | 10.29 | 74.76 | 14.95 |                  |           |
| 159  | 159      | 910     | 3/24/2015 | 34.57591  | -92.98907 | 92     | 0    | 0     | 0    | 0      | 206.08    | 5757.94 | 284.93     | 5.48 | 10.29 | 74.76 | 14.95 |                  |           |
| 159  | 159      | 911     | 3/24/2015 | 34.57591  | -92.98907 | 48     | 4    | 0     | 2    | 0      | 206.63    | 5744.00 | 278.21     | 6.16 | 10.29 | 74.76 | 14.95 |                  |           |

**APPENDIX D: *PROCAMBARUS REIMERI* SAMPLING SUPPLEMENTARY MATERIAL**

**Table D.1: Habitat covariates and counts measured at each quadrat for *Procambarus reimeri* in western Arkansas in the spring of 2014 and 2015. See Table 2.1 in main body of thesis for a description of each variable. The water\_trns corresponds to the water\_trans covariate in the main body, this variable was not measured in 2015. The burrow ownership column depicts the assumed ownership of each burrow counted in the corresponding quadrat.**

| Site | Transect | Quadrat | Date      | Latitude | Longitude | Canopy | Herb | Sedge | Stem | Burrow | Elevation | Solar   | Water_dist | CTI   | Sand   | Silt   | Clay   | Burrow ownership  | Water_trns |
|------|----------|---------|-----------|----------|-----------|--------|------|-------|------|--------|-----------|---------|------------|-------|--------|--------|--------|-------------------|------------|
| 1    | 36       | 210     | 4/21/2014 | 34.58384 | -94.14815 | 56     | 82   | 0     | 26   | 0      | 289.98    | 6071.78 | 62.75      | 10.83 | 23.360 | 60.210 | 16.430 |                   | Y          |
| 1    | 36       | 211     | 4/21/2014 | 34.58385 | -94.14825 | 2      | 76   | 1     | 36   | 0      | 289.68    | 6072.71 | 70.37      | 8.97  | 23.360 | 60.210 | 16.430 |                   | Y          |
| 1    | 36       | 212     | 4/21/2014 | 34.58385 | -94.14836 | 2      | 48   | 1     | 18   | 0      | 289.53    | 6072.47 | 78.44      | 9.40  | 13.380 | 67.570 | 19.050 |                   | Y          |
| 1    | 36       | 213     | 4/21/2014 | 34.58385 | -94.14847 | 1      | 68   | 1     | 29   | 0      | 289.39    | 6072.79 | 86.95      | 9.64  | 13.380 | 67.570 | 19.050 |                   | Y          |
| 1    | 36       | 214     | 4/21/2014 | 34.58386 | -94.14858 | 0      | 25   | 1     | 46   | 0      | 289.24    | 6073.48 | 95.64      | 8.61  | 11.060 | 66.200 | 22.740 |                   | Y          |
| 1    | 36       | 215     | 4/21/2014 | 34.58386 | -94.14869 | 0      | 65   | 1     | 36   | 1      | 289.03    | 6073.88 | 104.45     | 9.24  | 11.060 | 66.200 | 22.740 | <i>P. reimeri</i> | Y          |
| 1    | 37       | 216     | 4/21/2014 | 34.58377 | -94.14818 | 100    | 3    | 1     | 0    | 0      | 289.72    | 6070.08 | 59.81      | 8.12  | 27.270 | 57.390 | 14.510 |                   | N          |
| 1    | 37       | 217     | 4/21/2014 | 34.58377 | -94.14829 | 95     | 10   | 1     | 5    | 0      | 289.57    | 6070.61 | 68.18      | 10.55 | 27.270 | 57.390 | 14.510 |                   | N          |
| 1    | 37       | 218     | 4/21/2014 | 34.58378 | -94.14840 | 60     | 60   | 0     | 15   | 0      | 289.43    | 6070.98 | 76.85      | 9.64  | 37.370 | 47.920 | 14.710 |                   | N          |
| 1    | 37       | 219     | 4/21/2014 | 34.58378 | -94.14850 | 96     | 3    | 1     | 0    | 0      | 289.24    | 6071.04 | 85.63      | 10.26 | 37.370 | 47.920 | 14.710 |                   | N          |
| 1    | 37       | 220     | 4/21/2014 | 34.58379 | -94.14861 | 100    | 54   | 1     | 6    | 0      | 288.82    | 6072.07 | 94.58      | 8.81  | 33.190 | 54.500 | 12.310 |                   | N          |
| 1    | 37       | 221     | 4/21/2014 | 34.58379 | -94.14872 | 0      | 100  | 1     | 28   | 0      | 288.70    | 6073.28 | 103.76     | 9.31  | 33.190 | 54.500 | 12.310 |                   | N          |
| 1    | 38       | 222     | 4/21/2014 | 34.58403 | -94.14822 | 0      | 80   | 1     | 48   | 0      | 290.12    | 6074.66 | 82.89      | 9.33  | 37.070 | 48.260 | 14.670 |                   | N          |
| 1    | 38       | 223     | 4/21/2014 | 34.58403 | -94.14834 | 0      | 85   | 1     | 40   | 2      | 289.90    | 6075.23 | 90.29      | 7.99  | 37.070 | 48.260 | 14.670 | <i>P. reimeri</i> | N          |
| 1    | 38       | 224     | 4/21/2014 | 34.58404 | -94.14846 | 0      | 85   | 1     | 4    | 1      | 289.74    | 6075.35 | 98.26      | 9.02  | 35.460 | 49.660 | 14.880 | <i>P. reimeri</i> | N          |
| 1    | 38       | 225     | 4/21/2014 | 34.58404 | -94.14857 | 0      | 90   | 1     | 47   | 0      | 289.62    | 6075.40 | 106.79     | 9.60  | 35.460 | 49.660 | 14.880 |                   | N          |
| 1    | 38       | 226     | 4/21/2014 | 34.58405 | -94.14869 | 0      | 100  | 0     | 27   | 1      | 289.50    | 6075.64 | 115.63     | 13.85 | 31.860 | 52.520 | 15.420 | <i>P. reimeri</i> | N          |
| 1    | 38       | 227     | 4/21/2014 | 34.58405 | -94.14881 | 0      | 100  | 0     | 48   | 0      | 289.32    | 6076.25 | 124.85     | 10.48 | 31.860 | 52.520 | 15.420 |                   | N          |
| 2    | 39       | 228     | 4/21/2014 | 34.60709 | -94.16787 | 0      | 95   | 0     | 46   | 0      | 293.31    | 6073.12 | 75.45      | 11.32 | 16.540 | 44.370 | 39.090 |                   | Y          |
| 2    | 39       | 229     | 4/21/2014 | 34.60715 | -94.16779 | 1      | 100  | 0     | 14   | 0      | 293.42    | 6074.25 | 84.59      | 9.35  | 16.540 | 44.370 | 39.090 |                   | Y          |
| 2    | 39       | 230     | 4/21/2014 | 34.60720 | -94.16770 | 26     | 95   | 0     | 37   | 0      | 293.42    | 6074.50 | 93.74      | 10.37 | 43.760 | 38.000 | 18.250 |                   | Y          |
| 2    | 39       | 231     | 4/21/2014 | 34.60726 | -94.16762 | 8      | 95   | 0     | 14   | 0      | 293.52    | 6074.46 | 102.85     | 9.72  | 43.760 | 38.000 | 18.250 |                   | Y          |
| 2    | 39       | 232     | 4/21/2014 | 34.60732 | -94.16753 | 50     | 100  | 0     | 36   | 1      | 293.63    | 6074.14 | 112.10     | 9.03  | 29.640 | 43.410 | 26.950 | <i>P. reimeri</i> | Y          |
| 2    | 39       | 233     | 4/21/2014 | 34.60737 | -94.16745 | 0      | 100  | 0     | 27   | 0      | 293.61    | 6073.53 | 121.35     | 7.93  | 29.640 | 43.410 | 26.950 |                   | Y          |

**Table D.1 cont'd**

| Site | Transect | Quadrat | Date      | Latitude | Longitude | Canopy | Herb | Sedge | Stem | Burrow | Elevation | Solar   | Water_dist | CTI   | Sand   | Silt   | Clay   | Burrow ownership  | Water_trns |
|------|----------|---------|-----------|----------|-----------|--------|------|-------|------|--------|-----------|---------|------------|-------|--------|--------|--------|-------------------|------------|
| 2    | 40       | 234     | 4/21/2014 | 34.60757 | -94.16715 | 0      | 100  | 0     | 37   | 0      | 293.51    | 6073.14 | 134.72     | 9.33  | 31.880 | 50.250 | 17.870 |                   | Y          |
| 2    | 40       | 235     | 4/21/2014 | 34.60763 | -94.16707 | 0      | 100  | 1     | 38   | 0      | 293.50    | 6072.22 | 124.80     | 8.05  | 31.880 | 50.250 | 17.870 |                   | Y          |
| 2    | 40       | 236     | 4/21/2014 | 34.60768 | -94.16698 | 32     | 100  | 1     | 19   | 0      | 293.41    | 6072.10 | 114.89     | 12.73 | 32.590 | 46.350 | 21.060 |                   | Y          |
| 2    | 40       | 237     | 4/21/2014 | 34.60774 | -94.16690 | 0      | 100  | 0     | 34   | 0      | 293.34    | 6072.01 | 105.03     | 8.22  | 32.590 | 46.350 | 21.060 |                   | Y          |
| 2    | 40       | 238     | 4/21/2014 | 34.60780 | -94.16681 | 0      | 90   | 1     | 38   | 0      | 293.32    | 6071.59 | 95.04      | 8.54  | 30.470 | 51.870 | 17.660 |                   | Y          |
| 2    | 40       | 239     | 4/21/2014 | 34.60785 | -94.16673 | 0      | 80   | 0     | 28   | 0      | 293.26    | 6072.10 | 85.12      | 9.22  | 30.470 | 51.870 | 17.660 |                   | Y          |
| 2    | 41       | 240     | 4/21/2014 | 34.60764 | -94.16742 | 0      | 100  | 0     | 22   | 0      | 293.77    | 6073.43 | 134.28     | 8.59  | 26.830 | 53.480 | 19.690 |                   | Y          |
| 2    | 41       | 241     | 4/21/2014 | 34.60758 | -94.16750 | 0      | 100  | 0     | 40   | 0      | 293.75    | 6073.99 | 124.82     | 8.51  | 26.830 | 53.480 | 19.690 |                   | Y          |
| 2    | 41       | 242     | 4/21/2014 | 34.60753 | -94.16759 | 0      | 100  | 0     | 48   | 0      | 293.75    | 6073.99 | 115.37     | 8.93  | 25.490 | 51.550 | 22.960 |                   | Y          |
| 2    | 41       | 243     | 4/21/2014 | 34.60747 | -94.16767 | 0      | 100  | 0     | 50   | 0      | 293.73    | 6074.64 | 105.87     | 9.26  | 25.490 | 51.550 | 22.960 |                   | Y          |
| 2    | 41       | 244     | 4/21/2014 | 34.60741 | -94.16776 | 0      | 100  | 1     | 47   | 0      | 293.77    | 6075.34 | 96.41      | 9.86  | 29.880 | 49.570 | 20.550 |                   | Y          |
| 2    | 41       | 245     | 4/21/2014 | 34.60736 | -94.16784 | 0      | 97   | 1     | 47   | 1      | 293.66    | 6075.79 | 86.96      | 8.24  | 29.880 | 49.570 | 20.550 | <i>P. reimeri</i> | Y          |
| 3    | 42       | 246     | 4/22/2014 | 34.65613 | -94.10335 | 9      | 100  | 0     | 14   | 0      | 336.38    | 6093.12 | 4.68       | 10.58 | 41.960 | 37.590 | 20.450 |                   | Y          |
| 3    | 42       | 247     | 4/22/2014 | 34.65613 | -94.10324 | 0      | 100  | 1     | 27   | 0      | 336.81    | 6094.18 | 14.41      | 7.55  | 41.960 | 37.590 | 20.450 |                   | Y          |
| 3    | 42       | 248     | 4/22/2014 | 34.65613 | -94.10313 | 0      | 75   | 1     | 47   | 0      | 336.97    | 6094.48 | 24.01      | 9.05  | 42.230 | 37.290 | 20.480 |                   | Y          |
| 3    | 42       | 249     | 4/22/2014 | 34.65613 | -94.10301 | 1      | 100  | 1     | 26   | 0      | 337.15    | 6094.47 | 33.80      | 9.13  | 42.230 | 37.290 | 20.480 |                   | Y          |
| 3    | 42       | 250     | 4/22/2014 | 34.65613 | -94.10290 | 0      | 100  | 0     | 36   | 0      | 337.32    | 6094.35 | 43.76      | 9.15  | 29.740 | 50.410 | 19.850 |                   | Y          |
| 3    | 42       | 251     | 4/22/2014 | 34.65613 | -94.10279 | 0      | 95   | 0     | 56   | 0      | 337.47    | 6094.52 | 53.84      | 6.94  | 29.740 | 50.410 | 19.850 |                   | Y          |
| 3    | 43       | 252     | 4/22/2014 | 34.65633 | -94.10260 | 100    | 1    | 0     | 0    | 0      | 338.48    | 6096.04 | 76.64      | 8.25  | 34.910 | 45.970 | 19.120 |                   | Y          |
| 3    | 43       | 253     | 4/22/2014 | 34.65633 | -94.10249 | 87     | 3    | 1     | 0    | 0      | 338.94    | 6096.24 | 86.33      | 8.76  | 34.910 | 45.970 | 19.120 |                   | Y          |
| 3    | 43       | 254     | 4/22/2014 | 34.65633 | -94.10238 | 100    | 3    | 0     | 0    | 0      | 339.25    | 6096.65 | 96.06      | 8.19  | 36.600 | 46.430 | 16.970 |                   | Y          |
| 3    | 43       | 255     | 4/22/2014 | 34.65633 | -94.10226 | 100    | 15   | 0     | 4    | 0      | 339.50    | 6097.07 | 105.82     | 8.28  | 36.600 | 46.430 | 16.970 |                   | Y          |
| 3    | 43       | 256     | 4/22/2014 | 34.65633 | -94.10215 | 76     | 3    | 1     | 0    | 0      | 339.77    | 6096.89 | 115.70     | 7.43  | 40.460 | 43.610 | 15.930 |                   | Y          |
| 3    | 43       | 257     | 4/22/2014 | 34.65633 | -94.10204 | 96     | 15   | 0     | 0    | 0      | 340.10    | 6097.78 | 125.62     | 8.36  | 40.460 | 43.610 | 15.930 |                   | Y          |
| 3    | 44       | 258     | 4/22/2014 | 34.65633 | -94.10268 | 27     | 100  | 1     | 22   | 0      | 338.48    | 6096.04 | 69.71      | 8.25  | 30.070 | 54.680 | 15.250 |                   | N          |
| 3    | 44       | 259     | 4/22/2014 | 34.65642 | -94.10267 | 36     | 95   | 0     | 25   | 0      | 338.72    | 6095.63 | 74.21      | 9.11  | 30.070 | 54.680 | 15.250 |                   | N          |
| 3    | 44       | 260     | 4/22/2014 | 34.65651 | -94.10265 | 32     | 35   | 1     | 12   | 0      | 338.92    | 6096.64 | 79.33      | 8.38  | 43.570 | 35.540 | 20.890 |                   | N          |

Table D.1 cont'd

| Site | Transect | Quadrat | Date      | Latitude | Longitude | Canopy | Herb | Sedge | Stem | Burrow | Elevation | Solar   | Water_dist | CTI   | Sand   | Silt   | Clay   | Burrow ownership  | Water_trns |
|------|----------|---------|-----------|----------|-----------|--------|------|-------|------|--------|-----------|---------|------------|-------|--------|--------|--------|-------------------|------------|
| 3    | 44       | 261     | 4/22/2014 | 34.65660 | -94.10264 | 68     | 43   | 1     | 0    | 0      | 339.31    | 6097.35 | 84.45      | 8.03  | 43.570 | 35.540 | 20.890 |                   | N          |
| 3    | 44       | 262     | 4/22/2014 | 34.65670 | -94.10263 | 40     | 95   | 1     | 13   | 0      | 339.62    | 6096.41 | 89.57      | 7.83  | 46.010 | 38.830 | 15.050 |                   | N          |
| 3    | 44       | 263     | 4/22/2014 | 34.65679 | -94.10261 | 60     | 100  | 1     | 17   | 0      | 339.94    | 6095.55 | 94.48      | 7.63  | 46.010 | 38.830 | 15.050 |                   | N          |
| 4    | 45       | 264     | 4/22/2014 | 34.65406 | -94.11623 | 0      | 90   | 1     | 36   | 1      | 340.93    | 6097.71 | 148.57     | 8.13  | 43.810 | 34.560 | 21.530 | <i>P. reimeri</i> | Y          |
| 4    | 45       | 265     | 4/22/2014 | 34.65396 | -94.11623 | 0      | 100  | 1     | 47   | 0      | 340.78    | 6095.67 | 149.13     | 10.89 | 43.810 | 34.560 | 21.530 |                   | Y          |
| 4    | 45       | 266     | 4/22/2014 | 34.65387 | -94.11623 | 0      | 98   | 1     | 52   | 2      | 340.72    | 6092.59 | 150.10     | 7.32  | 25.890 | 51.290 | 22.820 | <i>P. reimeri</i> | Y          |
| 4    | 45       | 267     | 4/22/2014 | 34.65378 | -94.11623 | 0      | 85   | 1     | 38   | 1      | 340.76    | 6087.56 | 151.22     | 9.03  | 25.890 | 51.290 | 22.820 | <i>P. reimeri</i> | Y          |
| 4    | 45       | 268     | 4/22/2014 | 34.65369 | -94.11623 | 0      | 97   | 1     | 62   | 1      | 340.95    | 6081.14 | 153.07     | 8.59  | 50.620 | 32.430 | 16.950 | <i>P. reimeri</i> | Y          |
| 4    | 45       | 269     | 4/22/2014 | 34.65360 | -94.11624 | 72     | 90   | 1     | 69   | 1      | 341.30    | 6078.54 | 155.52     | 7.52  | 50.620 | 32.430 | 16.950 | <i>P. reimeri</i> | Y          |
| 4    | 46       | 270     | 4/22/2014 | 34.65407 | -94.11607 | 0      | 100  | 1     | 37   | 0      | 341.40    | 6096.86 | 134.18     | 7.41  | 32.840 | 41.970 | 25.190 |                   | Y          |
| 4    | 46       | 271     | 4/22/2014 | 34.65398 | -94.11607 | 0      | 100  | 1     | 63   | 0      | 341.31    | 6094.63 | 134.66     | 10.28 | 32.840 | 41.970 | 25.190 |                   | Y          |
| 4    | 46       | 272     | 4/22/2014 | 34.65389 | -94.11607 | 0      | 100  | 0     | 81   | 0      | 341.27    | 6091.33 | 135.54     | 9.47  | 38.530 | 43.190 | 18.280 |                   | Y          |
| 4    | 46       | 273     | 4/22/2014 | 34.65379 | -94.11608 | 0      | 100  | 0     | 52   | 0      | 341.36    | 6087.79 | 136.74     | 8.94  | 38.530 | 43.190 | 18.280 |                   | Y          |
| 4    | 46       | 274     | 4/22/2014 | 34.65370 | -94.11608 | 0      | 100  | 0     | 46   | 2      | 341.52    | 6086.21 | 138.66     | 8.10  | 30.240 | 47.400 | 22.360 | <i>P. reimeri</i> | Y          |
| 4    | 46       | 275     | 4/22/2014 | 34.65361 | -94.11608 | 0      | 99   | 1     | 32   | 1      | 341.70    | 6085.94 | 141.05     | 7.72  | 30.240 | 47.400 | 22.360 | <i>P. reimeri</i> | Y          |
| 4    | 47       | 276     | 4/22/2014 | 34.65407 | -94.11564 | 100    | 1    | 0     | 0    | 0      | 342.28    | 6097.74 | 94.78      | 9.47  | 30.240 | 47.400 | 22.360 |                   | N          |
| 4    | 47       | 277     | 4/22/2014 | 34.65398 | -94.11564 | 92     | 0    | 0     | 0    | 0      | 342.21    | 6095.20 | 95.37      | 8.07  | 30.440 | 59.680 | 9.880  |                   | N          |
| 4    | 47       | 278     | 4/22/2014 | 34.65389 | -94.11564 | 92     | 1    | 1     | 0    | 0      | 342.28    | 6094.26 | 96.25      | 8.94  | 30.440 | 59.680 | 9.880  |                   | N          |
| 4    | 47       | 279     | 4/22/2014 | 34.65379 | -94.11565 | 96     | 3    | 0     | 0    | 0      | 342.29    | 6096.11 | 97.84      | 9.14  | 30.440 | 59.680 | 9.880  |                   | N          |
| 4    | 47       | 280     | 4/22/2014 | 34.65370 | -94.11565 | 92     | 3    | 1     | 6    | 0      | 342.23    | 6096.54 | 100.26     | 8.90  | 32.510 | 53.950 | 13.540 |                   | N          |
| 4    | 47       | 281     | 4/22/2014 | 34.65361 | -94.11565 | 100    | 2    | 1     | 0    | 0      | 342.21    | 6095.66 | 103.04     | 10.55 | 32.510 | 53.950 | 13.540 |                   | N          |
| 4    | 48       | 282     | 4/22/2014 | 34.65445 | -94.11616 | 0      | 100  | 0     | 39   | 0      | 342.56    | 6102.63 | 147.33     | 8.67  | 25.880 | 50.260 | 23.860 |                   | Y          |
| 4    | 48       | 283     | 4/22/2014 | 34.65445 | -94.11627 | 0      | 70   | 1     | 29   | 0      | 342.33    | 6102.67 | 157.09     | 9.50  | 25.880 | 50.260 | 23.860 |                   | Y          |
| 4    | 48       | 284     | 4/22/2014 | 34.65445 | -94.11638 | 0      | 80   | 1     | 21   | 0      | 342.14    | 6102.39 | 166.86     | 9.23  | 35.070 | 47.370 | 17.370 |                   | Y          |
| 4    | 48       | 285     | 4/22/2014 | 34.65445 | -94.11649 | 0      | 70   | 1     | 28   | 1      | 341.89    | 6102.36 | 176.67     | 6.66  | 35.070 | 47.370 | 17.370 | <i>P. reimeri</i> | Y          |
| 4    | 48       | 286     | 4/22/2014 | 34.65445 | -94.11660 | 0      | 65   | 0     | 17   | 0      | 341.78    | 6102.63 | 186.39     | 9.33  | 35.440 | 43.560 | 21.000 |                   | Y          |
| 4    | 48       | 287     | 4/22/2014 | 34.65445 | -94.11670 | 0      | 95   | 1     | 22   | 1      | 341.62    | 6101.88 | 196.24     | 6.94  | 35.440 | 43.560 | 21.000 | <i>P. reimeri</i> | Y          |

Table D.1 cont'd

| Site | Transect | Quadrat | Date      | Latitude | Longitude | Canopy | Herb | Sedge | Stem | Burrow | Elevation | Solar   | Water_dist | CTI   | Sand   | Silt   | Clay   | Burrow ownership  | Water_trns |
|------|----------|---------|-----------|----------|-----------|--------|------|-------|------|--------|-----------|---------|------------|-------|--------|--------|--------|-------------------|------------|
| 5    | 49       | 288     | 4/22/2014 | 34.65771 | -94.15163 | 0      | 100  | 0     | 29   | 0      | 338.28    | 6103.39 | 55.14      | 6.63  | 21.780 | 60.450 | 17.770 |                   | N          |
| 5    | 49       | 289     | 4/22/2014 | 34.65763 | -94.15168 | 0      | 75   | 0     | 25   | 0      | 338.13    | 6103.77 | 52.21      | 6.42  | 21.780 | 60.450 | 17.770 |                   | N          |
| 5    | 49       | 290     | 4/22/2014 | 34.65755 | -94.15172 | 0      | 100  | 0     | 44   | 0      | 337.60    | 6103.11 | 49.69      | 6.83  | 19.290 | 57.040 | 23.670 |                   | N          |
| 5    | 49       | 291     | 4/22/2014 | 34.65747 | -94.15177 | 48     | 100  | 1     | 58   | 0      | 337.48    | 6102.39 | 49.07      | 7.39  | 19.290 | 57.040 | 23.670 |                   | N          |
| 5    | 49       | 292     | 4/22/2014 | 34.65739 | -94.15182 | 0      | 100  | 0     | 39   | 0      | 337.18    | 6100.67 | 49.83      | 7.86  | 29.950 | 43.900 | 26.060 |                   | N          |
| 5    | 49       | 293     | 4/22/2014 | 34.65730 | -94.15187 | 0      | 100  | 0     | 55   | 0      | 337.12    | 6102.34 | 52.14      | 7.86  | 29.950 | 43.900 | 26.060 |                   | N          |
| 5    | 50       | 294     | 4/22/2014 | 34.65777 | -94.15186 | 0      | 70   | 1     | 52   | 1      | 339.35    | 6105.56 | 75.21      | 7.23  | 24.640 | 55.140 | 20.230 | <i>P. reimeri</i> | Y          |
| 5    | 50       | 295     | 4/22/2014 | 34.65785 | -94.15181 | 0      | 90   | 1     | 30   | 0      | 339.50    | 6104.29 | 78.15      | 7.54  | 24.640 | 55.140 | 20.230 |                   | Y          |
| 5    | 50       | 296     | 4/22/2014 | 34.65793 | -94.15177 | 0      | 85   | 1     | 46   | 1      | 339.94    | 6104.49 | 81.75      | 8.22  | 23.290 | 51.220 | 25.490 | <i>P. reimeri</i> | Y          |
| 5    | 50       | 297     | 4/22/2014 | 34.65801 | -94.15172 | 0      | 12   | 1     | 0    | 2      | 340.10    | 6105.66 | 86.12      | 7.29  | 23.290 | 51.220 | 25.490 | <i>P. reimeri</i> | Y          |
| 5    | 50       | 298     | 4/22/2014 | 34.65810 | -94.15167 | 0      | 15   | 1     | 26   | 1      | 340.55    | 6104.40 | 90.74      | 8.71  | 39.180 | 40.680 | 20.140 | <i>P. reimeri</i> | Y          |
| 5    | 50       | 299     | 4/22/2014 | 34.65818 | -94.15162 | 0      | 100  | 1     | 76   | 0      | 340.58    | 6103.52 | 95.95      | 7.51  | 39.180 | 40.680 | 20.140 |                   | Y          |
| 5    | 51       | 300     | 4/22/2014 | 34.65734 | -94.15216 | 1      | 70   | 0     | 37   | 0      | 338.11    | 6105.17 | 79.38      | 6.40  | 36.710 | 49.040 | 14.250 |                   | Y          |
| 5    | 51       | 301     | 4/22/2014 | 34.65726 | -94.15221 | 38     | 90   | 0     | 44   | 0      | 337.72    | 6105.57 | 82.85      | 6.41  | 36.710 | 49.040 | 14.250 |                   | Y          |
| 5    | 51       | 302     | 4/22/2014 | 34.65718 | -94.15225 | 52     | 75   | 1     | 37   | 0      | 337.38    | 6104.59 | 87.33      | 12.47 | 20.090 | 48.300 | 31.610 |                   | Y          |
| 5    | 51       | 303     | 4/22/2014 | 34.65710 | -94.15230 | 32     | 70   | 1     | 3    | 0      | 336.85    | 6102.62 | 92.20      | 8.18  | 20.090 | 48.300 | 31.610 |                   | Y          |
| 5    | 51       | 304     | 4/22/2014 | 34.65701 | -94.15235 | 3      | 100  | 1     | 55   | 0      | 336.87    | 6099.00 | 97.72      | 9.76  | 29.630 | 51.970 | 18.400 |                   | Y          |
| 5    | 51       | 305     | 4/22/2014 | 34.65693 | -94.15240 | 8      | 45   | 1     | 0    | 0      | 336.62    | 6097.52 | 103.83     | 6.27  | 29.630 | 51.970 | 18.400 |                   | Y          |
| 5    | 52       | 306     | 4/22/2014 | 34.65712 | -94.15261 | 100    | 0    | 0     | 0    | 0      | 338.65    | 6093.40 | 120.28     | 8.44  | 43.000 | 44.710 | 12.100 |                   | Y          |
| 5    | 52       | 307     | 4/22/2014 | 34.65720 | -94.15256 | 92     | 3    | 1     | 0    | 0      | 338.37    | 6097.75 | 115.49     | 9.76  | 43.000 | 44.710 | 12.100 |                   | Y          |
| 5    | 52       | 308     | 4/22/2014 | 34.65728 | -94.15252 | 84     | 10   | 1     | 0    | 0      | 338.58    | 6100.26 | 111.26     | 8.09  | 20.450 | 56.420 | 23.130 |                   | Y          |
| 5    | 52       | 309     | 4/22/2014 | 34.65736 | -94.15247 | 80     | 20   | 0     | 2    | 0      | 338.69    | 6104.68 | 107.79     | 7.53  | 20.450 | 56.420 | 23.130 |                   | Y          |
| 5    | 52       | 310     | 4/22/2014 | 34.65745 | -94.15242 | 100    | 30   | 1     | 11   | 0      | 339.08    | 6105.17 | 105.06     | 12.77 | 15.690 | 54.640 | 29.570 |                   | Y          |
| 5    | 52       | 311     | 4/22/2014 | 34.65753 | -94.15237 | 72     | 100  | 1     | 22   | 0      | 339.30    | 6106.47 | 103.15     | 7.09  | 15.690 | 54.640 | 29.570 |                   | Y          |
| 6    | 53       | 312     | 4/22/2014 | 34.65057 | -94.16443 | 0      | 100  | 0     | 27   | 0      | 333.64    | 6101.48 | 82.42      | 7.68  | 28.160 | 50.520 | 21.320 |                   | Y          |
| 6    | 53       | 313     | 4/22/2014 | 34.65055 | -94.16454 | 0      | 100  | 1     | 48   | 0      | 333.79    | 6096.39 | 92.49      | 7.91  | 28.160 | 50.520 | 21.320 |                   | Y          |
| 6    | 53       | 314     | 4/22/2014 | 34.65053 | -94.16465 | 8      | 24   | 1     | 32   | 0      | 334.00    | 6091.73 | 102.59     | 9.49  | 17.250 | 46.870 | 35.760 |                   | Y          |



**Table D.1 cont'd**

| Site | Transect | Quadrat | Date      | Latitude | Longitude | Canopy | Herb | Sedge | Stem | Burrow | Elevation | Solar   | Water_dist | CTI   | Sand   | Silt   | Clay   | Burrow ownership  | Water_trns |
|------|----------|---------|-----------|----------|-----------|--------|------|-------|------|--------|-----------|---------|------------|-------|--------|--------|--------|-------------------|------------|
| 6    | 53       | 315     | 4/22/2014 | 34.65050 | -94.16475 | 0      | 54   | 1     | 42   | 0      | 334.28    | 6085.21 | 112.71     | 7.69  | 17.250 | 46.870 | 35.760 |                   | Y          |
| 6    | 53       | 316     | 4/22/2014 | 34.65048 | -94.16486 | 0      | 38   | 1     | 47   | 1      | 334.55    | 6076.03 | 122.83     | 6.98  | 26.820 | 54.330 | 18.850 | <i>P. reimeri</i> | Y          |
| 6    | 53       | 317     | 4/22/2014 | 34.65046 | -94.16497 | 0      | 100  | 1     | 17   | 0      | 335.44    | 6078.82 | 132.97     | 6.35  | 26.820 | 54.330 | 18.850 |                   | Y          |
| 6    | 54       | 318     | 4/22/2014 | 34.65041 | -94.16422 | 0      | 80   | 1     | 33   | 1      | 332.43    | 6099.03 | 65.97      | 7.97  | 25.430 | 52.440 | 22.130 | <i>P. reimeri</i> | Y          |
| 6    | 54       | 319     | 4/22/2014 | 34.65039 | -94.16433 | 0      | 76   | 1     | 17   | 1      | 332.76    | 6098.63 | 76.16      | 8.12  | 25.430 | 52.440 | 22.130 | <i>P. reimeri</i> | Y          |
| 6    | 54       | 320     | 4/22/2014 | 34.65037 | -94.16444 | 0      | 100  | 1     | 64   | 0      | 332.82    | 6095.64 | 86.35      | 13.01 | 32.510 | 50.530 | 16.960 |                   | Y          |
| 6    | 54       | 321     | 4/22/2014 | 34.65034 | -94.16455 | 0      | 95   | 1     | 26   | 1      | 333.60    | 6090.38 | 96.54      | 9.01  | 32.510 | 50.530 | 16.960 | <i>P. reimeri</i> | Y          |
| 6    | 54       | 322     | 4/22/2014 | 34.65032 | -94.16465 | 0      | 95   | 1     | 32   | 2      | 334.11    | 6084.98 | 106.73     | 7.55  | 30.510 | 55.880 | 13.610 | <i>P. reimeri</i> | Y          |
| 6    | 54       | 323     | 4/22/2014 | 34.65030 | -94.16476 | 0      | 70   | 1     | 42   | 1      | 334.68    | 6082.76 | 116.92     | 6.63  | 30.510 | 55.880 | 13.610 | <i>P. reimeri</i> | Y          |
| 6    | 55       | 324     | 4/22/2014 | 34.65014 | -94.16463 | 100    | 3    | 0     | 0    | 0      | 333.98    | 6091.83 | 110.85     | 7.44  | 29.580 | 54.460 | 15.960 |                   | N          |
| 6    | 55       | 325     | 4/22/2014 | 34.65016 | -94.16452 | 80     | 3    | 0     | 0    | 0      | 333.01    | 6091.11 | 100.80     | 7.84  | 29.580 | 54.460 | 15.960 |                   | N          |
| 6    | 55       | 326     | 4/22/2014 | 34.65018 | -94.16441 | 100    | 10   | 1     | 18   | 0      | 332.60    | 6092.50 | 90.79      | 6.52  | 31.710 | 53.850 | 14.440 |                   | N          |
| 6    | 55       | 327     | 4/22/2014 | 34.65021 | -94.16431 | 100    | 3    | 0     | 0    | 0      | 332.32    | 6093.50 | 80.82      | 9.95  | 31.710 | 53.850 | 14.440 |                   | N          |
| 6    | 55       | 328     | 4/22/2014 | 34.65023 | -94.16420 | 100    | 3    | 0     | 1    | 0      | 331.92    | 6093.30 | 70.87      | 12.88 | 30.740 | 52.610 | 16.660 |                   | N          |
| 6    | 55       | 329     | 4/22/2014 | 34.65025 | -94.16409 | 100    | 3    | 1     | 1    | 0      | 331.48    | 6093.46 | 60.93      | 12.87 | 30.740 | 52.610 | 16.660 |                   | N          |
| 7    | 56       | 330     | 4/23/2014 | 34.63678 | -94.20505 | 0      | 100  | 1     | 46   | 0      | 329.33    | 6087.85 | 21.38      | 11.56 | 29.360 | 53.140 | 17.500 |                   | Y          |
| 7    | 56       | 331     | 4/23/2014 | 34.63677 | -94.20494 | 0      | 70   | 1     | 38   | 0      | 329.31    | 6086.41 | 18.80      | 9.19  | 29.360 | 53.140 | 17.500 |                   | Y          |
| 7    | 56       | 332     | 4/23/2014 | 34.63676 | -94.20483 | 0      | 70   | 1     | 48   | 0      | 329.32    | 6085.65 | 18.87      | 7.61  | 29.190 | 52.660 | 18.070 |                   | Y          |
| 7    | 56       | 333     | 4/23/2014 | 34.63675 | -94.20472 | 0      | 75   | 1     | 33   | 0      | 329.50    | 6085.06 | 21.98      | 7.64  | 29.190 | 52.660 | 18.070 |                   | Y          |
| 7    | 56       | 334     | 4/23/2014 | 34.63674 | -94.20462 | 0      | 45   | 1     | 31   | 2      | 329.42    | 6085.45 | 27.88      | 10.37 | 29.940 | 52.400 | 17.660 | <i>P. reimeri</i> | Y          |
| 7    | 56       | 335     | 4/23/2014 | 34.63673 | -94.20451 | 0      | 100  | 1     | 54   | 1      | 329.43    | 6084.77 | 35.14      | 8.37  | 29.940 | 52.400 | 17.660 | <i>P. reimeri</i> | Y          |
| 7    | 57       | 336     | 4/23/2014 | 34.63665 | -94.20506 | 0      | 100  | 0     | 66   | 0      | 329.51    | 6087.07 | 34.81      | 9.48  | 29.980 | 55.560 | 14.460 |                   | Y          |
| 7    | 57       | 337     | 4/23/2014 | 34.63664 | -94.20495 | 0      | 100  | 1     | 48   | 0      | 329.57    | 6087.42 | 33.09      | 9.25  | 29.980 | 55.560 | 14.460 |                   | Y          |
| 7    | 57       | 338     | 4/23/2014 | 34.63663 | -94.20484 | 0      | 100  | 1     | 36   | 0      | 329.61    | 6088.30 | 33.13      | 8.58  | 27.440 | 49.400 | 23.160 |                   | Y          |
| 7    | 57       | 339     | 4/23/2014 | 34.63662 | -94.20473 | 0      | 100  | 1     | 84   | 0      | 329.59    | 6087.91 | 35.65      | 8.25  | 27.440 | 49.400 | 23.160 |                   | Y          |
| 7    | 57       | 340     | 4/23/2014 | 34.63661 | -94.20462 | 0      | 100  | 1     | 76   | 4      | 329.53    | 6086.30 | 39.82      | 10.55 | 33.460 | 48.700 | 17.840 | <i>P. reimeri</i> | Y          |
| 7    | 57       | 341     | 4/23/2014 | 34.63660 | -94.20452 | 0      | 100  | 1     | 88   | 0      | 329.61    | 6086.68 | 45.77      | 8.03  | 33.460 | 48.700 | 17.840 |                   | Y          |

Table D.1 cont'd

| Site | Transect | Quadrat | Date      | Latitude | Longitude | Canopy | Herb | Sedge | Stem | Burrow | Elevation | Solar   | Water_dist | CTI   | Sand   | Silt   | Clay   | Burrow ownership  | Water_trns |
|------|----------|---------|-----------|----------|-----------|--------|------|-------|------|--------|-----------|---------|------------|-------|--------|--------|--------|-------------------|------------|
| 7    | 58       | 342     | 4/23/2014 | 34.63655 | -94.20507 | 0      | 100  | 0     | 100  | 1      | 329.59    | 6087.16 | 45.70      | 8.77  | 18.600 | 46.330 | 35.060 | <i>P. reimeri</i> | Y          |
| 7    | 58       | 343     | 4/23/2014 | 34.63654 | -94.20496 | 0      | 99   | 0     | 66   | 0      | 329.63    | 6087.65 | 44.20      | 8.28  | 18.600 | 46.330 | 35.060 |                   | Y          |
| 7    | 58       | 344     | 4/23/2014 | 34.63653 | -94.20485 | 0      | 99   | 1     | 74   | 0      | 329.62    | 6088.35 | 44.33      | 9.39  | 22.830 | 54.120 | 23.050 |                   | Y          |
| 7    | 58       | 345     | 4/23/2014 | 34.63652 | -94.20474 | 0      | 100  | 1     | 48   | 1      | 329.62    | 6088.60 | 46.30      | 10.98 | 22.830 | 54.120 | 23.050 | <i>P. reimeri</i> | Y          |
| 7    | 58       | 346     | 4/23/2014 | 34.63651 | -94.20464 | 0      | 100  | 1     | 44   | 1      | 329.62    | 6088.13 | 49.69      | 9.45  | 39.500 | 44.100 | 16.290 | <i>P. reimeri</i> | Y          |
| 7    | 58       | 347     | 4/23/2014 | 34.63650 | -94.20453 | 0      | 100  | 1     | 53   | 1      | 329.61    | 6089.15 | 54.73      | 8.86  | 39.500 | 44.100 | 16.290 | <i>P. reimeri</i> | Y          |
| 7    | 59       | 348     | 4/23/2014 | 34.63643 | -94.20512 | 0      | 100  | 0     | 57   | 0      | 329.63    | 6085.98 | 59.77      | 8.97  | 33.410 | 50.130 | 16.460 |                   | Y          |
| 7    | 59       | 349     | 4/23/2014 | 34.63642 | -94.20501 | 0      | 100  | 1     | 74   | 0      | 329.69    | 6086.94 | 58.10      | 8.73  | 33.410 | 50.130 | 16.460 |                   | Y          |
| 7    | 59       | 350     | 4/23/2014 | 34.63641 | -94.20490 | 0      | 95   | 1     | 44   | 0      | 329.71    | 6088.60 | 57.86      | 11.48 | 23.540 | 59.580 | 16.880 |                   | Y          |
| 7    | 59       | 351     | 4/23/2014 | 34.63640 | -94.20479 | 0      | 100  | 1     | 40   | 3      | 329.68    | 6089.11 | 58.84      | 8.84  | 23.540 | 59.580 | 16.880 | <i>P. reimeri</i> | Y          |
| 7    | 59       | 352     | 4/23/2014 | 34.63639 | -94.20469 | 0      | 100  | 1     | 47   | 0      | 329.62    | 6089.48 | 61.40      | 11.59 | 39.290 | 43.600 | 17.110 |                   | Y          |
| 7    | 59       | 353     | 4/23/2014 | 34.63638 | -94.20458 | 0      | 100  | 0     | 38   | 0      | 329.70    | 6089.90 | 65.08      | 13.22 | 39.290 | 43.600 | 17.110 |                   | Y          |
| 7    | 60       | 354     | 4/23/2014 | 34.63633 | -94.20512 | 0      | 100  | 0     | 54   | 0      | 329.81    | 6087.58 | 70.35      | 9.30  | 34.360 | 50.370 | 15.270 |                   | Y          |
| 7    | 60       | 355     | 4/23/2014 | 34.63632 | -94.20501 | 0      | 100  | 1     | 56   | 0      | 329.76    | 6087.88 | 69.02      | 8.81  | 34.360 | 50.370 | 15.270 |                   | Y          |
| 7    | 60       | 356     | 4/23/2014 | 34.63631 | -94.20490 | 0      | 100  | 1     | 51   | 1      | 329.73    | 6088.44 | 68.91      | 10.08 | 24.780 | 51.240 | 23.980 | <i>P. reimeri</i> | Y          |
| 7    | 60       | 357     | 4/23/2014 | 34.63630 | -94.20479 | 0      | 100  | 0     | 44   | 0      | 329.70    | 6088.37 | 69.89      | 8.45  | 24.780 | 51.240 | 23.980 |                   | Y          |
| 7    | 60       | 358     | 4/23/2014 | 34.63629 | -94.20469 | 0      | 100  | 1     | 28   | 1      | 329.74    | 6088.56 | 72.27      | 10.13 | 43.890 | 42.900 | 13.220 | <i>P. reimeri</i> | Y          |
| 7    | 60       | 359     | 4/23/2014 | 34.63628 | -94.20458 | 0      | 100  | 0     | 58   | 0      | 329.71    | 6089.74 | 75.64      | 9.49  | 43.890 | 42.900 | 13.220 |                   | Y          |
| 7    | 61       | 360     | 4/23/2014 | 34.63607 | -94.20445 | 0      | 35   | 1     | 28   | 0      | 329.63    | 6090.51 | 101.66     | 13.12 | 40.690 | 40.770 | 18.530 |                   | N          |
| 7    | 61       | 361     | 4/23/2014 | 34.63598 | -94.20445 | 0      | 15   | 1     | 26   | 0      | 329.65    | 6089.67 | 111.47     | 9.32  | 40.690 | 40.770 | 18.530 |                   | N          |
| 7    | 61       | 362     | 4/23/2014 | 34.63588 | -94.20445 | 0      | 80   | 1     | 29   | 0      | 329.70    | 6088.70 | 121.33     | 8.51  | 38.250 | 48.790 | 12.960 |                   | N          |
| 7    | 61       | 363     | 4/23/2014 | 34.63579 | -94.20445 | 0      | 85   | 1     | 68   | 0      | 329.74    | 6089.26 | 131.29     | 8.90  | 38.250 | 48.790 | 12.960 |                   | N          |
| 7    | 61       | 364     | 4/23/2014 | 34.63570 | -94.20445 | 0      | 35   | 1     | 34   | 0      | 329.77    | 6089.65 | 141.29     | 11.11 | 39.400 | 46.090 | 14.510 |                   | N          |
| 7    | 61       | 365     | 4/23/2014 | 34.63561 | -94.20445 | 0      | 100  | 1     | 88   | 0      | 329.81    | 6089.56 | 151.34     | 8.85  | 39.400 | 46.090 | 14.510 |                   | N          |
| 8    | 62       | 366     | 4/23/2014 | 34.55729 | -94.20766 | 0      | 95   | 1     | 36   | 3      | 315.93    | 6083.94 | 127.84     | 12.24 | 20.710 | 58.550 | 20.740 | <i>P. reimeri</i> | N          |
| 8    | 62       | 367     | 4/23/2014 | 34.55736 | -94.20773 | 0      | 90   | 1     | 26   | 1      | 315.85    | 6084.73 | 137.91     | 10.56 | 20.710 | 58.550 | 20.740 | <i>P. reimeri</i> | N          |
| 8    | 62       | 368     | 4/23/2014 | 34.55743 | -94.20780 | 0      | 99   | 1     | 36   | 0      | 315.83    | 6084.69 | 148.05     | 8.39  | 31.090 | 54.750 | 14.130 |                   | N          |

**Table D.1 cont'd**

| Site | Transect | Quadrat | Date      | Latitude | Longitude | Canopy | Herb | Sedge | Stem | Burrow | Elevation | Solar   | Water_dist | CTI   | Sand   | Silt   | Clay   | Burrow ownership  | Water_trns |
|------|----------|---------|-----------|----------|-----------|--------|------|-------|------|--------|-----------|---------|------------|-------|--------|--------|--------|-------------------|------------|
| 8    | 62       | 369     | 4/23/2014 | 34.55751 | -94.20786 | 0      | 99   | 0     | 47   | 0      | 315.80    | 6085.73 | 158.13     | 12.84 | 31.090 | 54.750 | 14.130 |                   | N          |
| 8    | 62       | 370     | 4/23/2014 | 34.55758 | -94.20793 | 0      | 100  | 0     | 34   | 0      | 315.82    | 6086.18 | 168.35     | 8.44  | 18.400 | 61.510 | 20.090 |                   | N          |
| 8    | 62       | 371     | 4/23/2014 | 34.55765 | -94.20800 | 0      | 100  | 0     | 51   | 0      | 315.77    | 6083.60 | 178.42     | 8.28  | 18.400 | 61.510 | 20.090 |                   | N          |
| 8    | 63       | 372     | 4/23/2014 | 34.55721 | -94.20782 | 0      | 95   | 1     | 46   | 0      | 315.88    | 6082.88 | 130.84     | 8.87  | 12.600 | 66.800 | 20.600 |                   | N          |
| 8    | 63       | 373     | 4/23/2014 | 34.55728 | -94.20789 | 0      | 85   | 1     | 32   | 0      | 315.78    | 6082.64 | 140.93     | 9.19  | 12.600 | 66.800 | 20.600 |                   | N          |
| 8    | 63       | 374     | 4/23/2014 | 34.55736 | -94.20796 | 0      | 80   | 1     | 34   | 0      | 315.75    | 6083.58 | 151.04     | 14.29 | 12.750 | 65.050 | 22.200 |                   | N          |
| 8    | 63       | 375     | 4/23/2014 | 34.55743 | -94.20802 | 0      | 100  | 1     | 47   | 1      | 315.71    | 6085.78 | 161.08     | 14.29 | 12.750 | 65.050 | 22.200 | <i>P. reimeri</i> | N          |
| 8    | 63       | 376     | 4/23/2014 | 34.55750 | -94.20809 | 0      | 65   | 1     | 29   | 1      | 315.70    | 6084.86 | 171.17     | 8.64  | 12.330 | 63.640 | 24.030 | <i>P. reimeri</i> | N          |
| 8    | 63       | 377     | 4/23/2014 | 34.55757 | -94.20816 | 0      | 90   | 1     | 39   | 1      | 315.60    | 6083.29 | 181.21     | 8.09  | 12.330 | 63.640 | 24.030 | <i>P. reimeri</i> | N          |
| 8    | 64       | 378     | 4/23/2014 | 34.55741 | -94.20753 | 52     | 100  | 1     | 38   | 0      | 316.01    | 6084.26 | 132.20     | 8.98  | 41.980 | 44.780 | 12.730 |                   | N          |
| 8    | 64       | 379     | 4/23/2014 | 34.55748 | -94.20760 | 74     | 100  | 1     | 52   | 0      | 315.92    | 6084.39 | 142.25     | 8.84  | 41.980 | 44.780 | 12.730 |                   | N          |
| 8    | 64       | 380     | 4/23/2014 | 34.55755 | -94.20767 | 100    | 65   | 1     | 28   | 0      | 315.96    | 6085.68 | 152.26     | 12.20 | 19.840 | 65.160 | 15.000 |                   | N          |
| 8    | 64       | 381     | 4/23/2014 | 34.55763 | -94.20773 | 56     | 100  | 1     | 41   | 0      | 315.95    | 6086.03 | 162.42     | 7.98  | 19.840 | 65.160 | 15.000 |                   | N          |
| 8    | 64       | 382     | 4/23/2014 | 34.55770 | -94.20780 | 100    | 95   | 1     | 35   | 0      | 315.89    | 6085.73 | 172.44     | 10.39 | 38.170 | 52.950 | 8.880  |                   | N          |
| 8    | 64       | 383     | 4/23/2014 | 34.55777 | -94.20787 | 100    | 80   | 1     | 52   | 0      | 315.89    | 6085.73 | 182.48     | 10.59 | 38.170 | 52.950 | 8.880  |                   | N          |
| 8    | 65       | 384     | 4/23/2014 | 34.55681 | -94.20713 | 0      | 85   | 1     | 12   | 3      | 316.49    | 6078.72 | 56.16      | 7.69  | 18.460 | 60.980 | 20.560 | <i>P. reimeri</i> | Y          |
| 8    | 65       | 385     | 4/23/2014 | 34.55675 | -94.20705 | 0      | 45   | 1     | 0    | 1      | 316.65    | 6078.77 | 46.31      | 7.61  | 18.460 | 60.980 | 20.560 | <i>P. reimeri</i> | Y          |
| 8    | 65       | 386     | 4/23/2014 | 34.55668 | -94.20697 | 0      | 80   | 1     | 16   | 2      | 316.67    | 6077.63 | 36.60      | 8.24  | 26.720 | 52.760 | 20.520 | <i>P. reimeri</i> | Y          |
| 8    | 65       | 387     | 4/23/2014 | 34.55662 | -94.20689 | 0      | 80   | 1     | 5    | 0      | 316.89    | 6076.70 | 27.30      | 7.41  | 26.720 | 52.760 | 20.520 |                   | Y          |
| 8    | 65       | 388     | 4/23/2014 | 34.55655 | -94.20681 | 0      | 95   | 1     | 27   | 0      | 317.02    | 6076.96 | 18.89      | 7.74  | 21.180 | 47.990 | 30.830 |                   | Y          |
| 8    | 65       | 389     | 4/23/2014 | 34.55649 | -94.20674 | 0      | 95   | 1     | 29   | 1      | 317.01    | 6075.42 | 11.81      | 7.64  | 21.180 | 47.990 | 30.830 | <i>P. reimeri</i> | Y          |
| 8    | 66       | 390     | 4/23/2014 | 34.55671 | -94.20714 | 0      | 85   | 1     | 47   | 1      | 316.55    | 6079.65 | 47.68      | 9.04  | 19.860 | 63.060 | 17.080 | <i>P. reimeri</i> | Y          |
| 8    | 66       | 391     | 4/23/2014 | 34.55665 | -94.20706 | 0      | 100  | 1     | 63   | 0      | 316.74    | 6079.83 | 37.58      | 8.75  | 19.860 | 63.060 | 17.080 |                   | Y          |
| 8    | 66       | 392     | 4/23/2014 | 34.55658 | -94.20698 | 0      | 100  | 0     | 29   | 0      | 316.84    | 6078.35 | 27.47      | 8.40  | 14.430 | 57.760 | 27.800 |                   | Y          |
| 8    | 66       | 393     | 4/23/2014 | 34.55652 | -94.20690 | 0      | 100  | 0     | 29   | 0      | 317.00    | 6078.82 | 17.53      | 7.74  | 14.430 | 57.760 | 27.800 |                   | Y          |
| 8    | 66       | 394     | 4/23/2014 | 34.55645 | -94.20682 | 0      | 100  | 0     | 44   | 0      | 317.20    | 6078.91 | 8.13       | 7.83  | 21.450 | 47.890 | 30.660 |                   | Y          |
| 8    | 66       | 395     | 4/23/2014 | 34.55639 | -94.20674 | 0      | 100  | 0     | 48   | 0      | 317.34    | 6077.19 | 1.31       | 7.39  | 21.450 | 47.890 | 30.660 |                   | Y          |

**Table D.1 cont'd**

| Site | Transect | Quadrat | Date      | Latitude | Longitude | Canopy | Herb | Sedge | Stem | Burrow | Elevation | Solar   | Water_dist | CTI   | Sand   | Silt   | Clay   | Burrow ownership  | Water_trns |
|------|----------|---------|-----------|----------|-----------|--------|------|-------|------|--------|-----------|---------|------------|-------|--------|--------|--------|-------------------|------------|
| 8    | 67       | 396     | 4/23/2014 | 34.55673 | -94.20679 | 0      | 45   | 1     | 18   | 0      | 316.68    | 6079.42 | 38.79      | 8.10  | 18.980 | 52.060 | 28.960 |                   | Y          |
| 8    | 67       | 397     | 4/23/2014 | 34.55667 | -94.20670 | 0      | 30   | 1     | 0    | 0      | 316.61    | 6079.52 | 32.74      | 8.76  | 18.980 | 52.060 | 28.960 |                   | Y          |
| 8    | 67       | 398     | 4/23/2014 | 34.55661 | -94.20662 | 0      | 40   | 1     | 30   | 0      | 316.67    | 6074.62 | 28.96      | 8.76  | 20.420 | 51.990 | 27.580 |                   | Y          |
| 8    | 67       | 399     | 4/23/2014 | 34.55656 | -94.20653 | 0      | 99   | 0     | 46   | 0      | 316.81    | 6074.01 | 26.25      | 7.93  | 20.420 | 51.990 | 27.580 |                   | Y          |
| 8    | 67       | 400     | 4/23/2014 | 34.55650 | -94.20645 | 0      | 90   | 1     | 37   | 0      | 316.69    | 6076.65 | 25.51      | 7.88  | 27.910 | 52.700 | 19.390 |                   | Y          |
| 8    | 67       | 401     | 4/23/2014 | 34.55644 | -94.20636 | 0      | 80   | 1     | 48   | 2      | 316.70    | 6075.76 | 24.89      | 9.28  | 27.910 | 52.700 | 19.390 | <i>P. reimeri</i> | Y          |
| 4    | 68       | 402     | 4/23/2014 | 34.65411 | -94.11646 | 0      | 100  | 1     | 34   | 2      | 340.53    | 6099.74 | 170.11     | 7.89  | 18.860 | 55.870 | 25.270 | <i>P. reimeri</i> | Y          |
| 4    | 68       | 403     | 4/23/2014 | 34.65411 | -94.11657 | 0      | 80   | 0     | 23   | 0      | 340.24    | 6100.02 | 180.00     | 7.57  | 18.860 | 55.870 | 25.270 |                   | Y          |
| 4    | 68       | 404     | 4/23/2014 | 34.65411 | -94.11668 | 0      | 100  | 1     | 27   | 1      | 339.66    | 6099.93 | 189.98     | 7.75  | 17.010 | 52.980 | 30.010 | <i>P. reimeri</i> | Y          |
| 4    | 68       | 405     | 4/23/2014 | 34.65411 | -94.11679 | 0      | 100  | 1     | 36   | 1      | 339.32    | 6099.67 | 199.97     | 7.33  | 17.010 | 52.980 | 30.010 | <i>P. reimeri</i> | Y          |
| 4    | 68       | 406     | 4/23/2014 | 34.65411 | -94.11690 | 22     | 3    | 0     | 7    | 0      | 338.98    | 6099.25 | 209.95     | 7.08  | 40.420 | 37.260 | 22.320 |                   | Y          |
| 4    | 68       | 407     | 4/23/2014 | 34.65411 | -94.11701 | 0      | 100  | 1     | 47   | 2      | 338.63    | 6098.68 | 219.93     | 6.98  | 40.420 | 37.260 | 22.320 | <i>P. reimeri</i> | Y          |
| 4    | 69       | 408     | 4/23/2014 | 34.65365 | -94.11678 | 0      | 100  | 0     | 48   | 0      | 338.63    | 6069.79 | 189.36     | 8.65  | 30.580 | 45.250 | 24.170 |                   | Y          |
| 4    | 69       | 409     | 4/23/2014 | 34.65365 | -94.11689 | 0      | 80   | 1     | 38   | 0      | 337.88    | 6067.71 | 193.60     | 8.63  | 30.580 | 45.250 | 24.170 |                   | Y          |
| 4    | 69       | 410     | 4/23/2014 | 34.65365 | -94.11700 | 0      | 90   | 1     | 19   | 0      | 337.06    | 6068.06 | 197.76     | 8.34  | 36.980 | 41.570 | 21.450 |                   | Y          |
| 4    | 69       | 411     | 4/23/2014 | 34.65365 | -94.11711 | 0      | 85   | 1     | 22   | 1      | 336.20    | 6074.97 | 202.35     | 8.58  | 36.980 | 41.570 | 21.450 | <i>P. reimeri</i> | Y          |
| 4    | 69       | 412     | 4/23/2014 | 34.65365 | -94.11722 | 92     | 15   | 0     | 7    | 0      | 335.57    | 6084.38 | 207.02     | 11.80 | 45.750 | 41.720 | 12.530 |                   | Y          |
| 4    | 69       | 413     | 4/23/2014 | 34.65365 | -94.11733 | 96     | 3    | 0     | 0    | 0      | 334.92    | 6092.19 | 211.79     | 12.63 | 45.750 | 41.720 | 12.530 |                   | Y          |
| 9    | 70       | 414     | 4/23/2014 | 34.65422 | -94.15506 | 0      | 80   | 1     | 24   | 0      | 336.27    | 6092.25 | 29.68      | 10.52 | 24.220 | 62.050 | 13.730 |                   | Y          |
| 9    | 70       | 415     | 4/23/2014 | 34.65428 | -94.15498 | 0      | 100  | 1     | 28   | 0      | 336.61    | 6097.11 | 36.57      | 9.74  | 24.220 | 62.050 | 13.730 |                   | Y          |
| 9    | 70       | 416     | 4/23/2014 | 34.65435 | -94.15490 | 0      | 95   | 1     | 34   | 0      | 336.76    | 6099.29 | 43.55      | 9.53  | 24.880 | 60.440 | 14.680 |                   | Y          |
| 9    | 70       | 417     | 4/23/2014 | 34.65441 | -94.15482 | 0      | 95   | 1     | 27   | 0      | 336.95    | 6097.45 | 50.56      | 9.47  | 24.880 | 60.440 | 14.680 |                   | Y          |
| 9    | 70       | 418     | 4/23/2014 | 34.65447 | -94.15474 | 0      | 30   | 1     | 7    | 1      | 337.23    | 6098.50 | 58.37      | 9.04  | 35.400 | 42.620 | 21.980 | <i>P. reimeri</i> | Y          |
| 9    | 70       | 419     | 4/23/2014 | 34.65453 | -94.15466 | 0      | 30   | 1     | 6    | 0      | 337.39    | 6100.11 | 66.46      | 9.30  | 35.400 | 42.620 | 21.980 |                   | Y          |
| 9    | 71       | 420     | 4/23/2014 | 34.65416 | -94.15478 | 36     | 3    | 0     | 7    | 0      | 336.48    | 6102.91 | 55.71      | 11.65 | 37.930 | 40.190 | 21.890 |                   | N          |
| 9    | 71       | 421     | 4/23/2014 | 34.65423 | -94.15470 | 36     | 35   | 0     | 5    | 0      | 336.79    | 6102.51 | 62.68      | 9.25  | 37.930 | 40.190 | 21.890 |                   | N          |
| 9    | 71       | 422     | 4/23/2014 | 34.65429 | -94.15462 | 56     | 20   | 0     | 4    | 0      | 337.14    | 6101.90 | 69.56      | 6.84  | 29.240 | 56.090 | 14.670 |                   | N          |

**Table D.1 cont'd**

| Site | Transect | Quadrat | Date      | Latitude | Longitude | Canopy | Herb | Sedge | Stem | Burrow | Elevation | Solar   | Water_dist | CTI   | Sand   | Silt   | Clay   | Burrow ownership | Water_trns |
|------|----------|---------|-----------|----------|-----------|--------|------|-------|------|--------|-----------|---------|------------|-------|--------|--------|--------|------------------|------------|
| 9    | 71       | 423     | 4/23/2014 | 34.65435 | -94.15454 | 80     | 10   | 0     | 0    | 0      | 337.18    | 6102.68 | 76.45      | 7.07  | 29.240 | 56.090 | 14.670 |                  | N          |
| 9    | 71       | 424     | 4/23/2014 | 34.65441 | -94.15446 | 72     | 35   | 0     | 5    | 0      | 337.46    | 6102.54 | 83.56      | 8.05  | 21.100 | 55.270 | 23.630 |                  | N          |
| 9    | 71       | 425     | 4/23/2014 | 34.65447 | -94.15438 | 88     | 3    | 0     | 0    | 0      | 337.81    | 6102.74 | 91.21      | 7.52  | 21.100 | 55.270 | 23.630 |                  | N          |
| 9    | 72       | 426     | 4/23/2014 | 34.65387 | -94.15496 | 96     | 3    | 0     | 0    | 0      | 335.56    | 6104.52 | 44.74      | 7.80  | 25.650 | 51.520 | 22.840 |                  | N          |
| 9    | 72       | 427     | 4/23/2014 | 34.65393 | -94.15488 | 100    | 3    | 0     | 0    | 0      | 335.76    | 6104.56 | 50.70      | 8.23  | 25.650 | 51.520 | 22.840 |                  | N          |
| 9    | 72       | 428     | 4/23/2014 | 34.65400 | -94.15480 | 66     | 10   | 0     | 3    | 0      | 336.18    | 6104.92 | 56.65      | 7.31  | 34.740 | 44.130 | 21.130 |                  | N          |
| 9    | 72       | 429     | 4/23/2014 | 34.65406 | -94.15472 | 100    | 10   | 0     | 2    | 0      | 336.10    | 6105.60 | 62.59      | 7.47  | 34.740 | 44.130 | 21.130 |                  | N          |
| 9    | 72       | 430     | 4/23/2014 | 34.65412 | -94.15464 | 84     | 3    | 0     | 0    | 0      | 336.52    | 6104.41 | 68.62      | 7.25  | 31.490 | 44.830 | 23.690 |                  | N          |
| 9    | 72       | 431     | 4/23/2014 | 34.65418 | -94.15456 | 94     | 3    | 0     | 1    | 0      | 336.89    | 6103.58 | 75.32      | 10.91 | 31.490 | 44.830 | 23.690 |                  | N          |
| 160  | 160      | 912     | 4/17/2015 | 34.41528 | -94.35553 | 10     | 98   | 0     | 42   | 0      | 335.83    | 6101.24 | 128.79     | 8.89  | 42.17  | 49.05  | 8.78   |                  |            |
| 160  | 160      | 913     | 4/17/2015 | 34.41528 | -94.35553 | 4      | 95   | 0     | 38   | 0      | 335.93    | 6101.94 | 131.34     | 8.52  | 42.17  | 49.05  | 8.78   |                  |            |
| 160  | 160      | 914     | 4/17/2015 | 34.41528 | -94.35553 | 10     | 97   | 0     | 25   | 0      | 335.96    | 6101.54 | 134.20     | 8.68  | 42.17  | 49.05  | 8.78   |                  |            |
| 160  | 160      | 915     | 4/17/2015 | 34.41528 | -94.35553 | 6      | 95   | 0     | 32   | 0      | 336.15    | 6101.35 | 137.13     | 8.08  | 42.17  | 49.05  | 8.78   |                  |            |
| 160  | 160      | 916     | 4/17/2015 | 34.41528 | -94.35553 | 5      | 93   | 0     | 23   | 0      | 336.10    | 6101.62 | 140.07     | 10.40 | 42.17  | 49.05  | 8.78   |                  |            |
| 160  | 160      | 917     | 4/17/2015 | 34.41528 | -94.35553 | 10     | 97   | 0     | 26   | 0      | 336.25    | 6102.43 | 142.94     | 8.46  | 42.17  | 49.05  | 8.78   |                  |            |
| 161  | 161      | 918     | 4/21/2015 | 34.35899 | -94.41644 | 21     | 80   | 1     | 25   | 0      | 335.80    | 6093.39 | 251.31     | 8.35  | 28.46  | 55.12  | 16.42  |                  |            |
| 161  | 161      | 919     | 4/21/2015 | 34.35899 | -94.41644 | 27     | 95   | 1     | 16   | 0      | 335.60    | 6090.48 | 244.19     | 8.53  | 28.46  | 55.12  | 16.42  |                  |            |
| 161  | 161      | 920     | 4/21/2015 | 34.35899 | -94.41644 | 27     | 90   | 1     | 32   | 0      | 335.33    | 6092.45 | 237.41     | 8.89  | 28.46  | 55.12  | 16.42  |                  |            |
| 161  | 161      | 921     | 4/21/2015 | 34.35899 | -94.41644 | 25     | 85   | 1     | 30   | 0      | 335.14    | 6091.08 | 230.73     | 7.15  | 28.46  | 55.12  | 16.42  |                  |            |
| 161  | 161      | 922     | 4/21/2015 | 34.35899 | -94.41644 | 32     | 80   | 1     | 7    | 0      | 334.90    | 6089.15 | 224.43     | 9.19  | 28.46  | 55.12  | 16.42  |                  |            |
| 161  | 161      | 923     | 4/21/2015 | 34.35899 | -94.41644 | 20     | 85   | 0     | 9    | 0      | 334.67    | 6088.68 | 218.27     | 7.02  | 28.46  | 55.12  | 16.42  |                  |            |
| 163  | 163      | 924     | 4/19/2015 | 34.37500 | -94.34000 | 8      | 90   | 0     | 13   | 0      | 350.27    | 6109.74 | 96.26      | 8.25  | 45.70  | 47.08  | 7.23   |                  |            |
| 163  | 163      | 925     | 4/19/2015 | 34.37500 | -94.34000 | 20     | 85   | 0     | 12   | 0      | 350.27    | 6109.74 | 105.46     | 8.25  | 45.70  | 47.08  | 7.23   |                  |            |
| 163  | 163      | 926     | 4/19/2015 | 34.37500 | -94.34000 | 24     | 95   | 0     | 12   | 0      | 349.97    | 6110.47 | 114.75     | 6.98  | 45.70  | 47.08  | 7.23   |                  |            |
| 163  | 163      | 927     | 4/19/2015 | 34.37500 | -94.34000 | 30     | 85   | 0     | 16   | 0      | 349.64    | 6104.44 | 124.20     | 6.68  | 45.70  | 47.08  | 7.23   |                  |            |
| 163  | 163      | 928     | 4/19/2015 | 34.37500 | -94.34000 | 7      | 95   | 0     | 19   | 0      | 349.04    | 6100.00 | 133.67     | 7.21  | 45.70  | 47.08  | 7.23   |                  |            |
| 163  | 163      | 929     | 4/19/2015 | 34.37500 | -94.34000 | 42     | 90   | 0     | 11   | 0      | 349.03    | 6102.05 | 143.19     | 7.28  | 45.70  | 47.08  | 7.23   |                  |            |

Table D.1 cont'd

| Site | Transect | Quadrat | Date      | Latitude | Longitude | Canopy | Herb | Sedge | Stem | Burrow | Elevation | Solar   | Water_dist | CTI   | Sand  | Silt  | Clay  | Burrow ownership  | Water_trns |
|------|----------|---------|-----------|----------|-----------|--------|------|-------|------|--------|-----------|---------|------------|-------|-------|-------|-------|-------------------|------------|
| 164  | 164      | 930     | 4/18/2015 | 34.39311 | -94.33522 | 1      | 86   | 1     | 18   | 0      | 344.91    | 6105.27 | 137.81     | 8.38  | 45.70 | 47.08 | 7.23  |                   |            |
| 164  | 164      | 931     | 4/18/2015 | 34.39311 | -94.33522 | 40     | 80   | 1     | 7    | 0      | 345.23    | 6103.47 | 139.03     | 9.73  | 45.70 | 47.08 | 7.23  |                   |            |
| 164  | 164      | 932     | 4/18/2015 | 34.39311 | -94.33522 | 37     | 90   | 1     | 11   | 0      | 345.52    | 6100.98 | 140.86     | 8.83  | 45.70 | 47.08 | 7.23  |                   |            |
| 164  | 164      | 933     | 4/18/2015 | 34.39311 | -94.33522 | 24     | 95   | 1     | 10   | 0      | 345.96    | 6084.59 | 143.26     | 6.37  | 45.70 | 47.08 | 7.23  |                   |            |
| 164  | 164      | 934     | 4/18/2015 | 34.39311 | -94.33522 | 8      | 95   | 1     | 14   | 0      | 346.23    | 6077.47 | 145.98     | 7.65  | 45.70 | 47.08 | 7.23  |                   |            |
| 164  | 164      | 935     | 4/18/2015 | 34.39311 | -94.33522 | 0      | 97   | 1     | 7    | 0      | 346.59    | 6076.64 | 149.33     | 6.26  | 45.70 | 47.08 | 7.23  |                   |            |
| 166  | 166      | 936     | 4/14/2015 | 34.65028 | -94.16457 | 12     | 80   | 1     | 27   | 3      | 333.51    | 6087.30 | 108.98     | 7.48  | 36.14 | 52.07 | 11.79 | <i>P. reimeri</i> |            |
| 166  | 166      | 937     | 4/14/2015 | 34.65028 | -94.16457 | 1      | 88   | 1     | 47   | 2      | 333.03    | 6090.12 | 99.04      | 7.94  | 36.14 | 52.07 | 11.79 | <i>P. reimeri</i> |            |
| 166  | 166      | 938     | 4/14/2015 | 34.65028 | -94.16457 | 0      | 90   | 1     | 17   | 1      | 332.66    | 6092.11 | 89.20      | 9.50  | 36.14 | 52.07 | 11.79 | <i>P. reimeri</i> |            |
| 166  | 166      | 939     | 4/14/2015 | 34.65028 | -94.16457 | 0      | 75   | 1     | 46   | 1      | 332.32    | 6092.59 | 79.31      | 10.01 | 36.14 | 52.07 | 11.79 | <i>P. reimeri</i> |            |
| 166  | 166      | 940     | 4/14/2015 | 34.65028 | -94.16457 | 0      | 90   | 1     | 32   | 1      | 332.10    | 6094.76 | 69.49      | 10.05 | 36.14 | 52.07 | 11.79 | <i>P. reimeri</i> |            |
| 166  | 166      | 941     | 4/14/2015 | 34.65028 | -94.16457 | 0      | 70   | 1     | 42   | 0      | 331.73    | 6095.21 | 59.78      | 8.20  | 36.14 | 52.07 | 11.79 |                   |            |
| 167  | 167      | 942     | 4/11/2015 | 34.53557 | -94.22560 | 0      | 35   | 1     | 20   | 1      | 344.11    | 6096.20 | 105.09     | 11.33 | 12.52 | 70.16 | 17.31 | <i>P. reimeri</i> |            |
| 167  | 167      | 943     | 4/11/2015 | 34.53557 | -94.22560 | 0      | 45   | 1     | 14   | 1      | 344.04    | 6096.26 | 107.12     | 7.83  | 12.52 | 70.16 | 17.31 | <i>P. reimeri</i> |            |
| 167  | 167      | 944     | 4/11/2015 | 34.53557 | -94.22560 | 0      | 65   | 1     | 7    | 1      | 343.92    | 6095.70 | 109.82     | 9.15  | 12.52 | 70.16 | 17.31 | <i>P. reimeri</i> |            |
| 167  | 167      | 945     | 4/11/2015 | 34.53557 | -94.22560 | 0      | 65   | 1     | 18   | 0      | 343.77    | 6095.52 | 113.30     | 9.47  | 12.52 | 70.16 | 17.31 |                   |            |
| 167  | 167      | 946     | 4/11/2015 | 34.53557 | -94.22560 | 0      | 55   | 1     | 11   | 0      | 343.68    | 6096.08 | 117.12     | 8.19  | 12.52 | 70.16 | 17.31 |                   |            |
| 167  | 167      | 947     | 4/11/2015 | 34.53557 | -94.22560 | 0      | 45   | 1     | 27   | 0      | 343.52    | 6095.09 | 121.51     | 7.25  | 12.52 | 70.16 | 17.31 |                   |            |
| 170  | 170      | 948     | 4/15/2015 | 34.60364 | -94.20482 | 0      | 45   | 1     | 19   | 4      | 336.64    | 6103.95 | 139.87     | 7.23  | 33.99 | 54.64 | 11.36 | <i>P. reimeri</i> |            |
| 170  | 170      | 949     | 4/15/2015 | 34.60364 | -94.20482 | 0      | 65   | 1     | 22   | 2      | 336.32    | 6105.98 | 143.95     | 7.49  | 33.99 | 54.64 | 11.36 | <i>P. reimeri</i> |            |
| 170  | 170      | 950     | 4/15/2015 | 34.60364 | -94.20482 | 0      | 70   | 1     | 27   | 2      | 335.92    | 6106.37 | 148.48     | 7.73  | 33.99 | 54.64 | 11.36 | <i>P. reimeri</i> |            |
| 170  | 170      | 951     | 4/15/2015 | 34.60364 | -94.20482 | 1      | 65   | 1     | 16   | 1      | 335.49    | 6104.36 | 153.18     | 8.92  | 33.99 | 54.64 | 11.36 | <i>P. reimeri</i> |            |
| 170  | 170      | 952     | 4/15/2015 | 34.60364 | -94.20482 | 2      | 80   | 1     | 19   | 1      | 335.33    | 6100.18 | 157.87     | 11.33 | 33.99 | 54.64 | 11.36 | <i>P. reimeri</i> |            |
| 170  | 170      | 953     | 4/15/2015 | 34.60364 | -94.20482 | 3      | 45   | 1     | 13   | 0      | 335.44    | 6099.15 | 162.59     | 7.57  | 33.99 | 54.64 | 11.36 |                   |            |
| 172  | 172      | 954     | 4/17/2015 | 34.59108 | -94.36240 | 1      | 95   | 0     | 16   | 0      | 319.80    | 6095.80 | 403.50     | 7.73  | 40.99 | 47.79 | 11.21 |                   |            |
| 172  | 172      | 955     | 4/17/2015 | 34.59108 | -94.36240 | 4      | 87   | 1     | 9    | 0      | 319.71    | 6094.38 | 408.57     | 7.06  | 40.99 | 47.79 | 11.21 |                   |            |
| 172  | 172      | 956     | 4/17/2015 | 34.59108 | -94.36240 | 20     | 90   | 0     | 13   | 0      | 319.55    | 6091.48 | 413.68     | 7.21  | 40.99 | 47.79 | 11.21 |                   |            |

**Table D.1 cont'd**

| Site | Transect | Quadrat | Date      | Latitude | Longitude | Canopy | Herb | Sedge | Stem | Burrow | Elevation | Solar   | Water_dist | CTI   | Sand  | Silt  | Clay  | Burrow ownership  | Water_trns |
|------|----------|---------|-----------|----------|-----------|--------|------|-------|------|--------|-----------|---------|------------|-------|-------|-------|-------|-------------------|------------|
| 172  | 172      | 957     | 4/17/2015 | 34.59108 | -94.36240 | 20     | 90   | 1     | 64   | 0      | 319.37    | 6091.11 | 418.90     | 7.60  | 40.99 | 47.79 | 11.21 |                   |            |
| 172  | 172      | 958     | 4/17/2015 | 34.59108 | -94.36240 | 25     | 90   | 1     | 9    | 0      | 319.28    | 6091.67 | 424.02     | 7.73  | 40.99 | 47.79 | 11.21 |                   |            |
| 172  | 172      | 959     | 4/17/2015 | 34.59108 | -94.36240 | 41     | 85   | 1     | 16   | 0      | 319.19    | 6091.65 | 429.34     | 7.75  | 40.99 | 47.79 | 11.21 |                   |            |
| 174  | 174      | 960     | 4/10/2015 | 34.59349 | -94.32080 | 0      | 85   | 0     | 27   | 0      | 335.91    | 6097.06 | 102.73     | 8.80  | 37.67 | 51.73 | 10.60 |                   |            |
| 174  | 174      | 961     | 4/10/2015 | 34.59349 | -94.32080 | 0      | 90   | 0     | 10   | 0      | 335.74    | 6094.72 | 92.77      | 8.67  | 37.67 | 51.73 | 10.60 |                   |            |
| 174  | 174      | 962     | 4/10/2015 | 34.59349 | -94.32080 | 0      | 85   | 0     | 37   | 0      | 335.31    | 6091.80 | 82.83      | 8.51  | 37.67 | 51.73 | 10.60 |                   |            |
| 174  | 174      | 963     | 4/10/2015 | 34.59349 | -94.32080 | 0      | 90   | 0     | 25   | 0      | 334.88    | 6095.24 | 72.91      | 8.84  | 37.67 | 51.73 | 10.60 |                   |            |
| 174  | 174      | 964     | 4/10/2015 | 34.59349 | -94.32080 | 0      | 80   | 0     | 21   | 0      | 334.66    | 6098.22 | 63.01      | 12.44 | 37.67 | 51.73 | 10.60 |                   |            |
| 174  | 174      | 965     | 4/10/2015 | 34.59349 | -94.32080 | 0      | 90   | 0     | 7    | 0      | 334.42    | 6097.53 | 53.13      | 8.01  | 37.67 | 51.73 | 10.60 |                   |            |
| 175  | 175      | 966     | 4/18/2015 | 34.43276 | -94.46193 | 13     | 78   | 0     | 24   | 2      | 322.95    | 6092.07 | 492.64     | 8.95  | 13.11 | 73.70 | 13.19 | <i>P. reimeri</i> |            |
| 175  | 175      | 967     | 4/18/2015 | 34.43276 | -94.46193 | 4      | 85   | 0     | 19   | 0      | 322.78    | 6090.96 | 483.71     | 9.14  | 13.11 | 73.70 | 13.19 |                   |            |
| 175  | 175      | 968     | 4/18/2015 | 34.43276 | -94.46193 | 2      | 80   | 0     | 23   | 0      | 322.61    | 6089.95 | 474.78     | 10.12 | 13.11 | 73.70 | 13.19 |                   |            |
| 175  | 175      | 969     | 4/18/2015 | 34.43276 | -94.46193 | 8      | 90   | 0     | 22   | 0      | 322.46    | 6089.94 | 466.02     | 9.66  | 13.11 | 73.70 | 13.19 |                   |            |
| 175  | 175      | 970     | 4/18/2015 | 34.43276 | -94.46193 | 12     | 83   | 0     | 13   | 0      | 322.00    | 6090.88 | 457.18     | 10.15 | 13.11 | 73.70 | 13.19 |                   |            |
| 175  | 175      | 971     | 4/18/2015 | 34.43276 | -94.46193 | 9      | 90   | 0     | 6    | 0      | 321.96    | 6094.79 | 448.44     | 11.46 | 13.11 | 73.70 | 13.19 |                   |            |
| 178  | 178      | 972     | 4/18/2015 | 34.35961 | -94.37667 | 0      | 98   | 0     | 32   | 0      | 360.66    | 6113.61 | 263.95     | 9.07  | 28.46 | 55.12 | 16.42 |                   |            |
| 178  | 178      | 973     | 4/18/2015 | 34.35961 | -94.37667 | 0      | 97   | 0     | 17   | 0      | 360.65    | 6113.04 | 263.91     | 8.80  | 28.46 | 55.12 | 16.42 |                   |            |
| 178  | 178      | 974     | 4/18/2015 | 34.35961 | -94.37667 | 0      | 99   | 0     | 21   | 0      | 360.64    | 6113.16 | 263.88     | 8.86  | 28.46 | 55.12 | 16.42 |                   |            |
| 178  | 178      | 975     | 4/18/2015 | 34.35961 | -94.37667 | 0      | 100  | 0     | 17   | 0      | 360.65    | 6113.28 | 263.84     | 8.80  | 28.46 | 55.12 | 16.42 |                   |            |
| 178  | 178      | 976     | 4/18/2015 | 34.35961 | -94.37667 | 0      | 97   | 0     | 17   | 0      | 360.58    | 6112.64 | 263.92     | 8.18  | 28.46 | 55.12 | 16.42 |                   |            |
| 178  | 178      | 977     | 4/18/2015 | 34.35961 | -94.37667 | 0      | 98   | 0     | 12   | 0      | 360.50    | 6112.08 | 263.89     | 9.66  | 28.46 | 55.12 | 16.42 |                   |            |
| 180  | 180      | 978     | 4/14/2015 | 34.72329 | -94.23804 | 70     | 45   | 0     | 7    | 0      | 341.56    | 6088.55 | 67.76      | 11.24 | 43.01 | 49.47 | 7.52  |                   |            |
| 180  | 180      | 979     | 4/14/2015 | 34.72329 | -94.23804 | 56     | 35   | 1     | 12   | 0      | 341.64    | 6091.15 | 74.53      | 11.66 | 43.01 | 49.47 | 7.52  |                   |            |
| 180  | 180      | 980     | 4/14/2015 | 34.72329 | -94.23804 | 1      | 65   | 0     | 6    | 0      | 341.86    | 6091.34 | 81.50      | 7.94  | 43.01 | 49.47 | 7.52  |                   |            |
| 180  | 180      | 981     | 4/14/2015 | 34.72329 | -94.23804 | 5      | 80   | 1     | 14   | 0      | 341.92    | 6092.15 | 88.71      | 8.14  | 43.01 | 49.47 | 7.52  |                   |            |
| 180  | 180      | 982     | 4/14/2015 | 34.72329 | -94.23804 | 12     | 88   | 0     | 16   | 0      | 341.97    | 6092.13 | 96.09      | 11.77 | 43.01 | 49.47 | 7.52  |                   |            |
| 180  | 180      | 983     | 4/14/2015 | 34.72329 | -94.23804 | 9      | 90   | 1     | 5    | 0      | 342.07    | 6091.99 | 103.41     | 11.70 | 43.01 | 49.47 | 7.52  |                   |            |

**Table D.1 cont'd**

| Site | Transect | Quadrat | Date      | Latitude | Longitude | Canopy | Herb | Sedge | Stem | Burrow | Elevation | Solar   | Water_dist | CTI   | Sand  | Silt  | Clay  | Burrow ownership | Water_trns |
|------|----------|---------|-----------|----------|-----------|--------|------|-------|------|--------|-----------|---------|------------|-------|-------|-------|-------|------------------|------------|
| 182  | 182      | 984     | 4/10/2015 | 34.59201 | -94.28992 | 0      | 45   | 1     | 57   | 2      | 334.40    | 6094.97 | 230.52     | 9.80  | 37.67 | 51.73 | 10.60 |                  |            |
| 182  | 182      | 985     | 4/10/2015 | 34.59201 | -94.28992 | 4      | 75   | 1     | 37   | 0      | 334.56    | 6092.85 | 235.50     | 9.38  | 37.67 | 51.73 | 10.60 |                  |            |
| 182  | 182      | 986     | 4/10/2015 | 34.59201 | -94.28992 | 9      | 30   | 1     | 16   | 0      | 334.82    | 6089.92 | 229.68     | 8.52  | 37.67 | 51.73 | 10.60 |                  |            |
| 182  | 182      | 987     | 4/10/2015 | 34.59201 | -94.28992 | 12     | 78   | 1     | 24   | 0      | 335.08    | 6075.46 | 223.97     | 7.13  | 37.67 | 51.73 | 10.60 |                  |            |
| 182  | 182      | 988     | 4/10/2015 | 34.59201 | -94.28992 | 21     | 90   | 0     | 18   | 0      | 336.27    | 6083.15 | 218.50     | 5.85  | 37.67 | 51.73 | 10.60 |                  |            |
| 182  | 182      | 989     | 4/10/2015 | 34.59201 | -94.28992 | 12     | 85   | 0     | 46   | 0      | 336.90    | 6099.95 | 213.36     | 8.08  | 37.67 | 51.73 | 10.60 |                  |            |
| 186  | 186      | 990     | 4/2/2015  | 34.33675 | -93.98843 | 4      | 90   | 0     | 37   | 0      | 323.47    | 6090.94 | 90.14      | 7.76  | 30.88 | 55.90 | 13.22 |                  |            |
| 186  | 186      | 991     | 4/2/2015  | 34.33675 | -93.98843 | 4      | 95   | 0     | 27   | 0      | 323.65    | 6092.44 | 93.93      | 7.96  | 30.88 | 55.90 | 13.22 |                  |            |
| 186  | 186      | 992     | 4/2/2015  | 34.33675 | -93.98843 | 0      | 85   | 0     | 31   | 0      | 323.79    | 6089.52 | 98.13      | 7.70  | 30.88 | 55.90 | 13.22 |                  |            |
| 186  | 186      | 993     | 4/2/2015  | 34.33675 | -93.98843 | 9      | 100  | 0     | 32   | 0      | 323.83    | 6089.71 | 103.04     | 8.45  | 30.88 | 55.90 | 13.22 |                  |            |
| 186  | 186      | 994     | 4/2/2015  | 34.33675 | -93.98843 | 100    | 15   | 0     | 0    | 0      | 323.86    | 6088.00 | 106.32     | 9.28  | 30.88 | 55.90 | 13.22 |                  |            |
| 186  | 186      | 995     | 4/2/2015  | 34.33675 | -93.98843 | 40     | 35   | 0     | 16   | 0      | 323.87    | 6087.17 | 96.27      | 9.58  | 30.88 | 55.90 | 13.22 |                  |            |
| 187  | 187      | 996     | 4/21/2015 | 34.16070 | -94.41533 | 89     | 5    | 0     | 2    | 0      | 384.51    | 6129.44 | 142.54     | 9.33  | 34.00 | 54.29 | 11.71 |                  |            |
| 187  | 187      | 997     | 4/21/2015 | 34.16070 | -94.41533 | 100    | 5    | 0     | 0    | 0      | 384.58    | 6130.74 | 138.68     | 8.70  | 34.00 | 54.29 | 11.71 |                  |            |
| 187  | 187      | 998     | 4/21/2015 | 34.16070 | -94.41533 | 53     | 15   | 0     | 8    | 0      | 384.82    | 6131.70 | 135.46     | 8.95  | 34.00 | 54.29 | 11.71 |                  |            |
| 187  | 187      | 999     | 4/21/2015 | 34.16070 | -94.41533 | 43     | 65   | 0     | 13   | 0      | 384.89    | 6130.13 | 132.90     | 8.38  | 34.00 | 54.29 | 11.71 |                  |            |
| 187  | 187      | 1000    | 4/21/2015 | 34.16070 | -94.41533 | 90     | 20   | 0     | 0    | 0      | 384.88    | 6129.56 | 130.99     | 9.47  | 34.00 | 54.29 | 11.71 |                  |            |
| 187  | 187      | 1001    | 4/21/2015 | 34.16070 | -94.41533 | 25     | 55   | 0     | 9    | 0      | 384.95    | 6128.73 | 129.96     | 12.76 | 34.00 | 54.29 | 11.71 |                  |            |
| 188  | 188      | 1002    | 4/16/2015 | 34.46184 | -93.90311 | 46     | 85   | 0     | 12   | 0      | 353.10    | 6093.93 | 38.95      | 7.75  | 14.56 | 70.84 | 14.61 |                  |            |
| 188  | 188      | 1003    | 4/16/2015 | 34.46184 | -93.90311 | 40     | 88   | 0     | 19   | 0      | 352.78    | 6094.68 | 40.83      | 7.75  | 14.56 | 70.84 | 14.61 |                  |            |
| 188  | 188      | 1004    | 4/16/2015 | 34.46184 | -93.90311 | 20     | 90   | 0     | 25   | 0      | 352.22    | 6095.19 | 42.98      | 8.24  | 14.56 | 70.84 | 14.61 |                  |            |
| 188  | 188      | 1005    | 4/16/2015 | 34.46184 | -93.90311 | 3      | 97   | 1     | 22   | 0      | 352.06    | 6095.44 | 46.00      | 8.36  | 14.56 | 70.84 | 14.61 |                  |            |
| 188  | 188      | 1006    | 4/16/2015 | 34.46184 | -93.90311 | 31     | 87   | 0     | 20   | 0      | 351.85    | 6095.10 | 49.04      | 8.36  | 14.56 | 70.84 | 14.61 |                  |            |
| 188  | 188      | 1007    | 4/16/2015 | 34.46184 | -93.90311 | 41     | 83   | 0     | 21   | 0      | 351.46    | 6092.62 | 53.08      | 9.23  | 14.56 | 70.84 | 14.61 |                  |            |
| 190  | 190      | 1008    | 4/14/2015 | 34.65643 | -94.13260 | 0      | 90   | 0     | 27   | 0      | 337.77    | 6094.20 | 78.65      | 8.18  | 36.14 | 52.07 | 11.79 |                  |            |
| 190  | 190      | 1009    | 4/14/2015 | 34.65643 | -94.13260 | 0      | 95   | 0     | 28   | 0      | 338.10    | 6093.85 | 88.64      | 6.79  | 36.14 | 52.07 | 11.79 |                  |            |
| 190  | 190      | 1010    | 4/14/2015 | 34.65643 | -94.13260 | 0      | 95   | 0     | 23   | 0      | 338.36    | 6094.56 | 98.62      | 8.95  | 36.14 | 52.07 | 11.79 |                  |            |



Table D.1 cont'd

| Site | Transect | Quadrat | Date      | Latitude | Longitude | Canopy | Herb | Sedge | Stem | Burrow | Elevation | Solar   | Water_dist | CTI   | Sand  | Silt  | Clay  | Burrow<br>ownership | Water_trns |
|------|----------|---------|-----------|----------|-----------|--------|------|-------|------|--------|-----------|---------|------------|-------|-------|-------|-------|---------------------|------------|
| 190  | 190      | 1011    | 4/14/2015 | 34.65643 | -94.13260 | 25     | 85   | 0     | 27   | 0      | 338.69    | 6094.03 | 89.50      | 8.55  | 36.14 | 52.07 | 11.79 |                     |            |
| 190  | 190      | 1012    | 4/14/2015 | 34.65643 | -94.13260 | 98     | 65   | 0     | 32   | 0      | 339.17    | 6085.93 | 79.70      | 6.83  | 36.14 | 52.07 | 11.79 |                     |            |
| 190  | 190      | 1013    | 4/14/2015 | 34.65643 | -94.13260 | 32     | 35   | 0     | 18   | 0      | 339.99    | 6084.82 | 69.93      | 6.08  | 36.14 | 52.07 | 11.79 |                     |            |
| 195  | 195      | 1014    | 4/9/2015  | 34.55227 | -94.28708 | 0      | 88   | 0     | 58   | 0      | 335.57    | 6095.05 | 600.17     | 7.80  | 24.99 | 63.65 | 11.35 |                     |            |
| 195  | 195      | 1015    | 4/9/2015  | 34.55227 | -94.28708 | 0      | 85   | 0     | 78   | 0      | 335.43    | 6094.60 | 601.73     | 9.03  | 24.99 | 63.65 | 11.35 |                     |            |
| 195  | 195      | 1016    | 4/9/2015  | 34.55227 | -94.28708 | 0      | 95   | 0     | 32   | 0      | 335.39    | 6094.35 | 603.35     | 13.29 | 24.99 | 63.65 | 11.35 |                     |            |
| 195  | 195      | 1017    | 4/9/2015  | 34.55227 | -94.28708 | 0      | 95   | 0     | 52   | 0      | 335.39    | 6094.45 | 605.13     | 10.29 | 24.99 | 63.65 | 11.35 |                     |            |
| 195  | 195      | 1018    | 4/9/2015  | 34.55227 | -94.28708 | 0      | 99   | 0     | 56   | 0      | 335.39    | 6095.34 | 607.00     | 8.73  | 24.99 | 63.65 | 11.35 |                     |            |
| 195  | 195      | 1019    | 4/9/2015  | 34.55227 | -94.28708 | 4      | 98   | 0     | 49   | 0      | 335.47    | 6096.80 | 608.87     | 7.96  | 24.99 | 63.65 | 11.35 |                     |            |
| 197  | 197      | 1020    | 4/18/2015 | 34.37649 | -94.38387 | 0      | 87   | 0     | 4    | 2      | 330.07    | 6050.43 | 630.76     | 7.77  | 28.46 | 55.12 | 16.42 | <i>P. reimeri</i>   |            |
| 197  | 197      | 1021    | 4/18/2015 | 34.37649 | -94.38387 | 0      | 85   | 0     | 11   | 0      | 329.42    | 6064.75 | 624.01     | 8.26  | 28.46 | 55.12 | 16.42 |                     |            |
| 197  | 197      | 1022    | 4/18/2015 | 34.37649 | -94.38387 | 0      | 78   | 0     | 8    | 0      | 328.96    | 6072.55 | 617.48     | 9.46  | 28.46 | 55.12 | 16.42 |                     |            |
| 197  | 197      | 1023    | 4/18/2015 | 34.37649 | -94.38387 | 0      | 65   | 0     | 3    | 0      | 328.72    | 6077.65 | 610.91     | 9.78  | 28.46 | 55.12 | 16.42 |                     |            |
| 197  | 197      | 1024    | 4/18/2015 | 34.37649 | -94.38387 | 0      | 85   | 1     | 7    | 0      | 328.46    | 6082.26 | 604.52     | 7.27  | 28.46 | 55.12 | 16.42 |                     |            |
| 197  | 197      | 1025    | 4/18/2015 | 34.37649 | -94.38387 | 0      | 98   | 0     | 16   | 0      | 328.36    | 6083.27 | 598.19     | 7.31  | 28.46 | 55.12 | 16.42 |                     |            |
| 198  | 198      | 1026    | 4/15/2015 | 34.61970 | -94.10235 | 0      | 35   | 0     | 3    | 0      | 332.86    | 6093.08 | 90.91      | 9.26  | 31.30 | 52.55 | 16.15 |                     |            |
| 198  | 198      | 1027    | 4/15/2015 | 34.61970 | -94.10235 | 0      | 95   | 1     | 17   | 0      | 332.86    | 6091.96 | 88.45      | 6.32  | 31.30 | 52.55 | 16.15 |                     |            |
| 198  | 198      | 1028    | 4/15/2015 | 34.61970 | -94.10235 | 0      | 98   | 0     | 11   | 0      | 332.60    | 6090.78 | 87.18      | 7.24  | 31.30 | 52.55 | 16.15 |                     |            |
| 198  | 198      | 1029    | 4/15/2015 | 34.61970 | -94.10235 | 1      | 97   | 1     | 32   | 0      | 332.37    | 6082.16 | 86.62      | 9.28  | 31.30 | 52.55 | 16.15 |                     |            |
| 198  | 198      | 1030    | 4/15/2015 | 34.61970 | -94.10235 | 6      | 98   | 1     | 22   | 0      | 332.31    | 6073.00 | 87.19      | 6.95  | 31.30 | 52.55 | 16.15 |                     |            |
| 198  | 198      | 1031    | 4/15/2015 | 34.61970 | -94.10235 | 43     | 97   | 0     | 27   | 0      | 332.28    | 6066.16 | 88.15      | 7.75  | 31.30 | 52.55 | 16.15 |                     |            |
| 200  | 200      | 1032    | 4/9/2015  | 34.56834 | -94.25409 | 0      | 70   | 0     | 18   | 0      | 347.16    | 6104.49 | 281.88     | 8.77  | 33.99 | 54.64 | 11.36 |                     |            |
| 200  | 200      | 1033    | 4/9/2015  | 34.56834 | -94.25409 | 0      | 95   | 0     | 32   | 0      | 347.08    | 6104.98 | 287.83     | 7.84  | 33.99 | 54.64 | 11.36 |                     |            |
| 200  | 200      | 1034    | 4/9/2015  | 34.56834 | -94.25409 | 0      | 95   | 0     | 42   | 0      | 347.03    | 6105.17 | 293.94     | 8.48  | 33.99 | 54.64 | 11.36 |                     |            |
| 200  | 200      | 1035    | 4/9/2015  | 34.56834 | -94.25409 | 0      | 98   | 0     | 38   | 0      | 347.00    | 6104.60 | 300.32     | 10.93 | 33.99 | 54.64 | 11.36 |                     |            |
| 200  | 200      | 1036    | 4/9/2015  | 34.56834 | -94.25409 | 0      | 99   | 0     | 47   | 0      | 347.02    | 6100.45 | 306.90     | 11.48 | 33.99 | 54.64 | 11.36 |                     |            |
| 200  | 200      | 1037    | 4/9/2015  | 34.56834 | -94.25409 | 0      | 95   | 0     | 28   | 0      | 347.24    | 6096.77 | 313.66     | 8.84  | 33.99 | 54.64 | 11.36 |                     |            |

**Table D.1 cont'd**

| Site | Transect | Quadrat | Date      | Latitude | Longitude | Canopy | Herb | Sedge | Stem | Burrow | Elevation | Solar   | Water_dist | CTI   | Sand  | Silt  | Clay  | Burrow ownership  | Water_trns |
|------|----------|---------|-----------|----------|-----------|--------|------|-------|------|--------|-----------|---------|------------|-------|-------|-------|-------|-------------------|------------|
| 201  | 201      | 1038    | 4/11/2015 | 34.50230 | -94.02217 | 0      | 90   | 1     | 13   | 0      | 325.26    | 6062.69 | 128.03     | 8.62  | 23.47 | 64.09 | 12.44 |                   |            |
| 201  | 201      | 1039    | 4/11/2015 | 34.50230 | -94.02217 | 0      | 55   | 0     | 11   | 0      | 324.58    | 6041.73 | 134.27     | 10.03 | 23.47 | 64.09 | 12.44 |                   |            |
| 201  | 201      | 1040    | 4/11/2015 | 34.50230 | -94.02217 | 0      | 90   | 0     | 24   | 0      | 324.58    | 6041.73 | 140.93     | 10.03 | 23.47 | 64.09 | 12.44 |                   |            |
| 201  | 201      | 1041    | 4/11/2015 | 34.50230 | -94.02217 | 22     | 85   | 1     | 16   | 0      | 324.67    | 6025.75 | 147.92     | 6.78  | 23.47 | 64.09 | 12.44 |                   |            |
| 201  | 201      | 1042    | 4/11/2015 | 34.50230 | -94.02217 | 32     | 95   | 0     | 24   | 0      | 325.68    | 6008.29 | 155.29     | 6.59  | 23.47 | 64.09 | 12.44 |                   |            |
| 201  | 201      | 1043    | 4/11/2015 | 34.50230 | -94.02217 | 40     | 90   | 1     | 18   | 0      | 326.81    | 6002.90 | 162.83     | 6.12  | 23.47 | 64.09 | 12.44 |                   |            |
| 204  | 204      | 1044    | 4/21/2015 | 34.32547 | -94.38884 | 0      | 90   | 1     | 28   | 0      | 330.76    | 6084.87 | 89.82      | 10.82 | 34.00 | 54.29 | 11.71 |                   |            |
| 204  | 204      | 1045    | 4/21/2015 | 34.32547 | -94.38884 | 0      | 95   | 0     | 22   | 0      | 330.80    | 6093.35 | 85.62      | 9.06  | 34.00 | 54.29 | 11.71 |                   |            |
| 204  | 204      | 1046    | 4/21/2015 | 34.32547 | -94.38884 | 4      | 97   | 1     | 32   | 0      | 331.17    | 6092.14 | 82.41      | 6.15  | 34.00 | 54.29 | 11.71 |                   |            |
| 204  | 204      | 1047    | 4/21/2015 | 34.32547 | -94.38884 | 3      | 95   | 1     | 27   | 0      | 331.52    | 6094.89 | 78.89      | 6.45  | 34.00 | 54.29 | 11.71 |                   |            |
| 204  | 204      | 1048    | 4/21/2015 | 34.32547 | -94.38884 | 8      | 90   | 1     | 26   | 0      | 330.88    | 6096.14 | 73.55      | 6.28  | 34.00 | 54.29 | 11.71 |                   |            |
| 204  | 204      | 1049    | 4/21/2015 | 34.32547 | -94.38884 | 4      | 98   | 0     | 28   | 0      | 330.85    | 6092.27 | 68.11      | 6.71  | 34.00 | 54.29 | 11.71 |                   |            |
| 205  | 205      | 1050    | 4/11/2015 | 34.58804 | -94.26631 | 15     | 60   | 1     | 34   | 4      | 348.45    | 6105.15 | 180.40     | 10.28 | 37.67 | 51.73 | 10.60 | <i>P. reimeri</i> |            |
| 205  | 205      | 1051    | 4/11/2015 | 34.58804 | -94.26631 | 11     | 45   | 1     | 41   | 4      | 348.49    | 6105.18 | 183.18     | 8.14  | 37.67 | 51.73 | 10.60 | <i>P. reimeri</i> |            |
| 205  | 205      | 1052    | 4/11/2015 | 34.58804 | -94.26631 | 16     | 65   | 1     | 30   | 3      | 348.49    | 6105.30 | 186.33     | 10.08 | 37.67 | 51.73 | 10.60 | <i>P. reimeri</i> |            |
| 205  | 205      | 1053    | 4/11/2015 | 34.58804 | -94.26631 | 9      | 55   | 1     | 7    | 2      | 348.58    | 6106.05 | 187.88     | 7.77  | 37.67 | 51.73 | 10.60 | <i>P. reimeri</i> |            |
| 205  | 205      | 1054    | 4/11/2015 | 34.58804 | -94.26631 | 10     | 50   | 1     | 41   | 2      | 348.61    | 6106.77 | 188.34     | 7.64  | 37.67 | 51.73 | 10.60 | <i>P. reimeri</i> |            |
| 205  | 205      | 1055    | 4/11/2015 | 34.58804 | -94.26631 | 0      | 65   | 1     | 21   | 1      | 348.54    | 6107.48 | 189.21     | 8.05  | 37.67 | 51.73 | 10.60 | <i>P. reimeri</i> |            |
| 206  | 206      | 1056    | 4/11/2015 | 34.58151 | -94.22252 | 0      | 99   | 0     | 118  | 0      | 329.98    | 6093.57 | 171.49     | 8.14  | 33.99 | 54.64 | 11.36 |                   |            |
| 206  | 206      | 1057    | 4/11/2015 | 34.58151 | -94.22252 | 0      | 100  | 0     | 114  | 0      | 329.98    | 6093.80 | 164.22     | 8.50  | 33.99 | 54.64 | 11.36 |                   |            |
| 206  | 206      | 1058    | 4/11/2015 | 34.58151 | -94.22252 | 0      | 100  | 1     | 96   | 0      | 329.97    | 6094.73 | 157.32     | 10.12 | 33.99 | 54.64 | 11.36 |                   |            |
| 206  | 206      | 1059    | 4/11/2015 | 34.58151 | -94.22252 | 0      | 100  | 0     | 84   | 0      | 329.90    | 6094.95 | 150.61     | 11.04 | 33.99 | 54.64 | 11.36 |                   |            |
| 206  | 206      | 1060    | 4/11/2015 | 34.58151 | -94.22252 | 0      | 87   | 1     | 88   | 0      | 329.90    | 6094.04 | 143.87     | 10.77 | 33.99 | 54.64 | 11.36 |                   |            |
| 206  | 206      | 1061    | 4/11/2015 | 34.58151 | -94.22252 | 0      | 100  | 0     | 110  | 0      | 329.93    | 6093.38 | 137.57     | 8.24  | 33.99 | 54.64 | 11.36 |                   |            |
| 207  | 207      | 1062    | 4/14/2015 | 34.65010 | -94.16549 | 12     | 65   | 1     | 21   | 0      | 336.45    | 6090.78 | 186.58     | 6.53  | 36.14 | 52.07 | 11.79 |                   |            |
| 207  | 207      | 1063    | 4/14/2015 | 34.65010 | -94.16549 | 17     | 75   | 1     | 24   | 0      | 336.18    | 6091.54 | 176.60     | 6.96  | 36.14 | 52.07 | 11.79 |                   |            |
| 207  | 207      | 1064    | 4/14/2015 | 34.65010 | -94.16549 | 15     | 55   | 1     | 21   | 0      | 335.76    | 6095.30 | 166.64     | 6.47  | 36.14 | 52.07 | 11.79 |                   |            |

Table D.1 cont'd

| Site | Transect | Quadrat | Date      | Latitude | Longitude | Canopy | Herb | Sedge | Stem | Burrow | Elevation | Solar   | Water_dist | CTI   | Sand  | Silt  | Clay  | Burrow_ownership  | Water_trns |
|------|----------|---------|-----------|----------|-----------|--------|------|-------|------|--------|-----------|---------|------------|-------|-------|-------|-------|-------------------|------------|
| 207  | 207      | 1065    | 4/14/2015 | 34.65010 | -94.16549 | 22     | 45   | 1     | 10   | 0      | 335.19    | 6099.94 | 156.57     | 7.60  | 36.14 | 52.07 | 11.79 |                   |            |
| 207  | 207      | 1066    | 4/14/2015 | 34.65010 | -94.16549 | 7      | 95   | 1     | 14   | 0      | 335.08    | 6102.84 | 146.59     | 7.31  | 36.14 | 52.07 | 11.79 |                   |            |
| 207  | 207      | 1067    | 4/14/2015 | 34.65010 | -94.16549 | 6      | 95   | 1     | 37   | 0      | 335.01    | 6103.02 | 136.60     | 7.29  | 36.14 | 52.07 | 11.79 |                   |            |
| 211  | 211      | 1068    | 4/12/2015 | 34.49381 | -93.90891 | 100    | 10   | 0     | 0    | 0      | 306.86    | 6077.92 | 47.25      | 8.95  | 14.56 | 70.84 | 14.61 |                   |            |
| 211  | 211      | 1069    | 4/12/2015 | 34.49381 | -93.90891 | 66     | 15   | 0     | 0    | 0      | 307.04    | 6076.74 | 54.48      | 7.75  | 14.56 | 70.84 | 14.61 |                   |            |
| 211  | 211      | 1070    | 4/12/2015 | 34.49381 | -93.90891 | 88     | 35   | 1     | 0    | 0      | 307.10    | 6074.59 | 62.15      | 8.06  | 14.56 | 70.84 | 14.61 |                   |            |
| 211  | 211      | 1071    | 4/12/2015 | 34.49381 | -93.90891 | 47     | 70   | 1     | 23   | 0      | 307.33    | 6073.61 | 70.34      | 7.53  | 14.56 | 70.84 | 14.61 |                   |            |
| 211  | 211      | 1072    | 4/12/2015 | 34.49381 | -93.90891 | 73     | 60   | 0     | 7    | 0      | 307.26    | 6072.11 | 78.91      | 9.42  | 14.56 | 70.84 | 14.61 |                   |            |
| 211  | 211      | 1073    | 4/12/2015 | 34.49381 | -93.90891 | 51     | 100  | 1     | 19   | 0      | 307.23    | 6071.94 | 87.74      | 10.10 | 14.56 | 70.84 | 14.61 |                   |            |
| 213  | 213      | 1074    | 4/14/2015 | 34.64357 | -94.19765 | 59     | 88   | 1     | 22   | 0      | 327.27    | 6089.95 | 56.88      | 7.77  | 36.14 | 52.07 | 11.79 |                   |            |
| 213  | 213      | 1075    | 4/14/2015 | 34.64357 | -94.19765 | 98     | 95   | 1     | 36   | 0      | 327.13    | 6088.71 | 60.28      | 7.28  | 36.14 | 52.07 | 11.79 |                   |            |
| 213  | 213      | 1076    | 4/14/2015 | 34.64357 | -94.19765 | 35     | 85   | 0     | 27   | 0      | 326.74    | 6093.04 | 55.91      | 7.45  | 36.14 | 52.07 | 11.79 |                   |            |
| 213  | 213      | 1077    | 4/14/2015 | 34.64357 | -94.19765 | 27     | 90   | 1     | 17   | 0      | 326.58    | 6094.14 | 48.50      | 7.26  | 36.14 | 52.07 | 11.79 |                   |            |
| 213  | 213      | 1078    | 4/14/2015 | 34.64357 | -94.19765 | 89     | 85   | 0     | 21   | 0      | 326.35    | 6094.77 | 39.32      | 7.57  | 36.14 | 52.07 | 11.79 |                   |            |
| 213  | 213      | 1079    | 4/14/2015 | 34.64357 | -94.19765 | 53     | 95   | 0     | 24   | 0      | 326.15    | 6094.93 | 30.55      | 7.16  | 36.14 | 52.07 | 11.79 |                   |            |
| 214  | 214      | 1080    | 4/17/2015 | 34.43245 | -94.34029 | 31     | 70   | 0     | 18   | 0      | 337.10    | 6080.77 | 162.08     | 8.59  | 42.17 | 49.05 | 8.78  |                   |            |
| 214  | 214      | 1081    | 4/17/2015 | 34.43245 | -94.34029 | 30     | 80   | 0     | 6    | 0      | 337.10    | 6081.92 | 153.27     | 7.15  | 42.17 | 49.05 | 8.78  |                   |            |
| 214  | 214      | 1082    | 4/17/2015 | 34.43245 | -94.34029 | 23     | 35   | 0     | 3    | 0      | 337.08    | 6087.24 | 144.61     | 6.97  | 42.17 | 49.05 | 8.78  |                   |            |
| 214  | 214      | 1083    | 4/17/2015 | 34.43245 | -94.34029 | 42     | 45   | 0     | 11   | 0      | 336.98    | 6095.90 | 136.09     | 6.69  | 42.17 | 49.05 | 8.78  |                   |            |
| 214  | 214      | 1084    | 4/17/2015 | 34.43245 | -94.34029 | 31     | 70   | 0     | 0    | 0      | 336.78    | 6100.21 | 127.83     | 8.49  | 42.17 | 49.05 | 8.78  |                   |            |
| 214  | 214      | 1085    | 4/17/2015 | 34.43245 | -94.34029 | 24     | 20   | 3     | 0    | 0      | 336.62    | 6100.98 | 119.84     | 8.94  | 42.17 | 49.05 | 8.78  |                   |            |
| 216  | 216      | 1086    | 4/10/2015 | 34.63903 | -94.41092 | 0      | 67   | 1     | 47   | 3      | 303.15    | 6083.77 | 258.03     | 8.13  | 23.42 | 62.71 | 13.87 | <i>P. reimeri</i> |            |
| 216  | 216      | 1087    | 4/10/2015 | 34.63903 | -94.41092 | 4      | 60   | 1     | 10   | 3      | 303.15    | 6083.70 | 261.41     | 8.12  | 23.42 | 62.71 | 13.87 | <i>P. reimeri</i> |            |
| 216  | 216      | 1088    | 4/10/2015 | 34.63903 | -94.41092 | 1      | 98   | 1     | 42   | 1      | 302.32    | 6082.44 | 264.60     | 8.22  | 23.42 | 62.71 | 13.87 | <i>P. reimeri</i> |            |
| 216  | 216      | 1089    | 4/10/2015 | 34.63903 | -94.41092 | 24     | 80   | 1     | 28   | 1      | 301.81    | 6081.68 | 267.94     | 8.61  | 23.42 | 62.71 | 13.87 | <i>P. reimeri</i> |            |
| 216  | 216      | 1090    | 4/10/2015 | 34.63903 | -94.41092 | 45     | 80   | 1     | 36   | 1      | 301.88    | 6081.46 | 271.53     | 8.75  | 23.42 | 62.71 | 13.87 | <i>P. reimeri</i> |            |
| 216  | 216      | 1091    | 4/10/2015 | 34.63903 | -94.41092 | 60     | 45   | 1     | 52   | 1      | 301.45    | 6078.69 | 275.56     | 10.53 | 23.42 | 62.71 | 13.87 | <i>P. reimeri</i> |            |

**Table D.1 cont'd**

| Site | Transect | Quadrat | Date      | Latitude | Longitude | Canopy | Herb | Sedge | Stem | Burrow | Elevation | Solar   | Water_dist | CTI  | Sand  | Silt  | Clay  | Burrow ownership | Water_trns |
|------|----------|---------|-----------|----------|-----------|--------|------|-------|------|--------|-----------|---------|------------|------|-------|-------|-------|------------------|------------|
| 221  | 221      | 1092    | 4/19/2015 | 34.35120 | -94.35957 | 17     | 25   | 1     | 4    | 2      | 359.12    | 6103.89 | 126.75     | 7.80 | 45.70 | 47.08 | 7.23  |                  |            |
| 221  | 221      | 1093    | 4/19/2015 | 34.35120 | -94.35957 | 23     | 65   | 1     | 11   | 1      | 359.52    | 6095.68 | 123.29     | 7.19 | 45.70 | 47.08 | 7.23  |                  |            |
| 221  | 221      | 1094    | 4/19/2015 | 34.35120 | -94.35957 | 12     | 77   | 1     | 21   | 0      | 360.44    | 6101.30 | 120.58     | 6.80 | 45.70 | 47.08 | 7.23  |                  |            |
| 221  | 221      | 1095    | 4/19/2015 | 34.35120 | -94.35957 | 15     | 87   | 1     | 19   | 0      | 360.72    | 6111.65 | 118.63     | 6.97 | 45.70 | 47.08 | 7.23  |                  |            |
| 221  | 221      | 1096    | 4/19/2015 | 34.35120 | -94.35957 | 13     | 80   | 1     | 10   | 0      | 360.57    | 6106.22 | 117.13     | 6.98 | 45.70 | 47.08 | 7.23  |                  |            |
| 221  | 221      | 1097    | 4/19/2015 | 34.35120 | -94.35957 | 15     | 85   | 1     | 8    | 0      | 360.27    | 6100.05 | 115.66     | 7.52 | 45.70 | 47.08 | 7.23  |                  |            |
| 222  | 222      | 1098    | 4/10/2015 | 34.56499 | -94.40951 | 0      | 55   | 0     | 22   | 0      | 323.46    | 6097.77 | 379.35     | 7.74 | 25.36 | 64.04 | 10.60 |                  |            |
| 222  | 222      | 1099    | 4/10/2015 | 34.56499 | -94.40951 | 0      | 70   | 0     | 16   | 0      | 323.79    | 6097.17 | 370.92     | 7.15 | 25.36 | 64.04 | 10.60 |                  |            |
| 222  | 222      | 1100    | 4/10/2015 | 34.56499 | -94.40951 | 0      | 65   | 0     | 13   | 0      | 323.88    | 6094.42 | 362.57     | 8.14 | 25.36 | 64.04 | 10.60 |                  |            |
| 222  | 222      | 1101    | 4/10/2015 | 34.56499 | -94.40951 | 0      | 70   | 0     | 39   | 0      | 324.04    | 6092.73 | 354.14     | 7.58 | 25.36 | 64.04 | 10.60 |                  |            |
| 222  | 222      | 1102    | 4/10/2015 | 34.56499 | -94.40951 | 0      | 90   | 0     | 32   | 0      | 323.94    | 6092.21 | 345.79     | 9.42 | 25.36 | 64.04 | 10.60 |                  |            |
| 222  | 222      | 1103    | 4/10/2015 | 34.56499 | -94.40951 | 0      | 85   | 0     | 32   | 0      | 324.06    | 6094.30 | 337.40     | 8.40 | 25.36 | 64.04 | 10.60 |                  |            |
| 223  | 223      | 1104    | 4/16/2015 | 34.59415 | -93.94822 | 2      | 15   | 0     | 14   | 0      | 317.98    | 6090.08 | 35.02      | 6.63 | 22.14 | 65.75 | 12.11 |                  |            |
| 223  | 223      | 1105    | 4/16/2015 | 34.59415 | -93.94822 | 12     | 35   | 0     | 27   | 0      | 318.15    | 6087.11 | 36.12      | 6.79 | 22.14 | 65.75 | 12.11 |                  |            |
| 223  | 223      | 1106    | 4/16/2015 | 34.59415 | -93.94822 | 13     | 85   | 0     | 24   | 0      | 318.33    | 6088.51 | 37.32      | 6.94 | 22.14 | 65.75 | 12.11 |                  |            |
| 223  | 223      | 1107    | 4/16/2015 | 34.59415 | -93.94822 | 22     | 90   | 0     | 18   | 0      | 318.42    | 6087.00 | 38.43      | 7.17 | 22.14 | 65.75 | 12.11 |                  |            |
| 223  | 223      | 1108    | 4/16/2015 | 34.59415 | -93.94822 | 100    | 5    | 0     | 0    | 0      | 318.42    | 6085.32 | 39.83      | 7.38 | 22.14 | 65.75 | 12.11 |                  |            |
| 223  | 223      | 1109    | 4/16/2015 | 34.59415 | -93.94822 | 81     | 75   | 0     | 11   | 0      | 318.42    | 6086.75 | 41.64      | 7.41 | 22.14 | 65.75 | 12.11 |                  |            |
| 227  | 227      | 1110    | 4/10/2015 | 34.64431 | -94.45112 | 0      | 70   | 1     | 37   | 0      | 304.94    | 6065.24 | 13.50      | 8.43 | 23.42 | 62.71 | 13.87 |                  |            |
| 227  | 227      | 1111    | 4/10/2015 | 34.64431 | -94.45112 | 0      | 80   | 0     | 29   | 0      | 305.21    | 6069.18 | 23.48      | 8.85 | 23.42 | 62.71 | 13.87 |                  |            |
| 227  | 227      | 1112    | 4/10/2015 | 34.64431 | -94.45112 | 0      | 90   | 0     | 76   | 0      | 305.46    | 6069.38 | 33.45      | 8.70 | 23.42 | 62.71 | 13.87 |                  |            |
| 227  | 227      | 1113    | 4/10/2015 | 34.64431 | -94.45112 | 0      | 85   | 1     | 31   | 0      | 305.70    | 6067.55 | 43.42      | 7.81 | 23.42 | 62.71 | 13.87 |                  |            |
| 227  | 227      | 1114    | 4/10/2015 | 34.64431 | -94.45112 | 0      | 95   | 1     | 54   | 0      | 306.20    | 6069.57 | 53.30      | 7.41 | 23.42 | 62.71 | 13.87 |                  |            |
| 227  | 227      | 1115    | 4/10/2015 | 34.64431 | -94.45112 | 0      | 65   | 1     | 38   | 0      | 306.46    | 6072.64 | 63.28      | 7.10 | 23.42 | 62.71 | 13.87 |                  |            |
| 229  | 229      | 1116    | 4/17/2015 | 34.48272 | -94.39660 | 2      | 80   | 0     | 21   | 0      | 301.56    | 6083.85 | 281.25     | 8.27 | 15.85 | 64.74 | 19.40 |                  |            |
| 229  | 229      | 1117    | 4/17/2015 | 34.48272 | -94.39660 | 1      | 70   | 0     | 17   | 0      | 301.54    | 6083.97 | 280.19     | 8.26 | 15.85 | 64.74 | 19.40 |                  |            |
| 229  | 229      | 1118    | 4/17/2015 | 34.48272 | -94.39660 | 10     | 85   | 0     | 31   | 0      | 301.54    | 6084.56 | 279.19     | 9.78 | 15.85 | 64.74 | 19.40 |                  |            |

**Table D.1 cont'd**

| Site | Transect | Quadrat | Date      | Latitude | Longitude | Canopy | Herb | Sedge | Stem | Burrow | Elevation | Solar   | Water_dist | CTI   | Sand  | Silt  | Clay  | Burrow ownership  | Water_trns |
|------|----------|---------|-----------|----------|-----------|--------|------|-------|------|--------|-----------|---------|------------|-------|-------|-------|-------|-------------------|------------|
| 229  | 229      | 1119    | 4/17/2015 | 34.48272 | -94.39660 | 41     | 80   | 0     | 12   | 0      | 301.53    | 6085.16 | 278.51     | 8.27  | 15.85 | 64.74 | 19.40 |                   |            |
| 229  | 229      | 1120    | 4/17/2015 | 34.48272 | -94.39660 | 36     | 87   | 0     | 11   | 0      | 301.53    | 6085.26 | 278.07     | 6.59  | 15.85 | 64.74 | 19.40 |                   |            |
| 229  | 229      | 1121    | 4/17/2015 | 34.48272 | -94.39660 | 5      | 90   | 0     | 21   | 0      | 301.31    | 6084.34 | 277.73     | 11.32 | 15.85 | 64.74 | 19.40 |                   |            |
| 234  | 234      | 1122    | 4/10/2015 | 34.59190 | -94.29022 | 0      | 75   | 1     | 32   | 1      | 333.54    | 6102.55 | 172.79     | 8.32  | 37.67 | 51.73 | 10.60 |                   |            |
| 234  | 234      | 1123    | 4/10/2015 | 34.59190 | -94.29022 | 20     | 70   | 1     | 27   | 0      | 333.90    | 6104.13 | 164.80     | 7.83  | 37.67 | 51.73 | 10.60 |                   |            |
| 234  | 234      | 1124    | 4/10/2015 | 34.59190 | -94.29022 | 20     | 95   | 1     | 37   | 0      | 333.83    | 6103.68 | 156.87     | 6.73  | 37.67 | 51.73 | 10.60 |                   |            |
| 234  | 234      | 1125    | 4/10/2015 | 34.59190 | -94.29022 | 4      | 80   | 1     | 25   | 0      | 333.69    | 6103.19 | 148.80     | 8.39  | 37.67 | 51.73 | 10.60 |                   |            |
| 234  | 234      | 1126    | 4/10/2015 | 34.59190 | -94.29022 | 0      | 99   | 0     | 42   | 0      | 333.60    | 6102.79 | 140.81     | 6.84  | 37.67 | 51.73 | 10.60 |                   |            |
| 234  | 234      | 1127    | 4/10/2015 | 34.59190 | -94.29022 | 0      | 95   | 0     | 46   | 0      | 333.45    | 6102.28 | 132.81     | 8.25  | 37.67 | 51.73 | 10.60 |                   |            |
| 236  | 236      | 1128    | 4/18/2015 | 34.39311 | -94.33360 | 0      | 96   | 1     | 16   | 2      | 344.95    | 6111.40 | 168.01     | 8.26  | 45.70 | 47.08 | 7.23  | <i>P. reimeri</i> |            |
| 236  | 236      | 1129    | 4/18/2015 | 34.39311 | -94.33360 | 0      | 97   | 1     | 23   | 0      | 345.09    | 6111.67 | 166.14     | 9.11  | 45.70 | 47.08 | 7.23  |                   |            |
| 236  | 236      | 1130    | 4/18/2015 | 34.39311 | -94.33360 | 0      | 90   | 1     | 23   | 0      | 344.99    | 6111.92 | 164.98     | 8.75  | 45.70 | 47.08 | 7.23  |                   |            |
| 236  | 236      | 1131    | 4/18/2015 | 34.39311 | -94.33360 | 17     | 95   | 1     | 22   | 0      | 344.88    | 6111.94 | 164.30     | 8.86  | 45.70 | 47.08 | 7.23  |                   |            |
| 236  | 236      | 1132    | 4/18/2015 | 34.39311 | -94.33360 | 38     | 90   | 1     | 27   | 0      | 344.91    | 6111.88 | 164.23     | 8.86  | 45.70 | 47.08 | 7.23  |                   |            |
| 236  | 236      | 1133    | 4/18/2015 | 34.39311 | -94.33360 | 10     | 97   | 1     | 14   | 0      | 345.06    | 6111.30 | 164.88     | 6.73  | 45.70 | 47.08 | 7.23  |                   |            |
| 237  | 237      | 1134    | 4/17/2015 | 34.59109 | -94.36215 | 0      | 87   | 0     | 24   | 0      | 320.40    | 6092.66 | 387.88     | 7.36  | 40.99 | 47.79 | 11.21 |                   |            |
| 237  | 237      | 1135    | 4/17/2015 | 34.59109 | -94.36215 | 0      | 95   | 0     | 29   | 0      | 320.53    | 6093.45 | 383.92     | 7.27  | 40.99 | 47.79 | 11.21 |                   |            |
| 237  | 237      | 1136    | 4/17/2015 | 34.59109 | -94.36215 | 0      | 90   | 0     | 11   | 0      | 320.63    | 6092.07 | 379.85     | 7.51  | 40.99 | 47.79 | 11.21 |                   |            |
| 237  | 237      | 1137    | 4/17/2015 | 34.59109 | -94.36215 | 6      | 65   | 0     | 7    | 0      | 320.82    | 6094.51 | 375.88     | 6.67  | 40.99 | 47.79 | 11.21 |                   |            |
| 237  | 237      | 1138    | 4/17/2015 | 34.59109 | -94.36215 | 0      | 86   | 0     | 16   | 0      | 320.93    | 6096.54 | 371.82     | 8.06  | 40.99 | 47.79 | 11.21 |                   |            |
| 237  | 237      | 1139    | 4/17/2015 | 34.59109 | -94.36215 | 0      | 90   | 1     | 11   | 0      | 321.00    | 6096.52 | 367.85     | 8.40  | 40.99 | 47.79 | 11.21 |                   |            |
| 238  | 238      | 1140    | 4/12/2015 | 34.51524 | -94.03127 | 0      | 100  | 0     | 17   | 0      | 318.26    | 6067.73 | 80.81      | 8.42  | 23.47 | 64.09 | 12.44 |                   |            |
| 238  | 238      | 1141    | 4/12/2015 | 34.51524 | -94.03127 | 0      | 90   | 1     | 21   | 0      | 318.26    | 6067.73 | 74.33      | 8.42  | 23.47 | 64.09 | 12.44 |                   |            |
| 238  | 238      | 1142    | 4/12/2015 | 34.51524 | -94.03127 | 1      | 65   | 1     | 32   | 0      | 318.79    | 6065.63 | 68.58      | 7.35  | 23.47 | 64.09 | 12.44 |                   |            |
| 238  | 238      | 1143    | 4/12/2015 | 34.51524 | -94.03127 | 4      | 13   | 0     | 7    | 0      | 319.37    | 6064.75 | 62.97      | 6.68  | 23.47 | 64.09 | 12.44 |                   |            |
| 238  | 238      | 1144    | 4/12/2015 | 34.51524 | -94.03127 | 0      | 90   | 1     | 33   | 0      | 319.46    | 6066.28 | 58.07      | 8.53  | 23.47 | 64.09 | 12.44 |                   |            |
| 238  | 238      | 1145    | 4/12/2015 | 34.51524 | -94.03127 | 0      | 95   | 0     | 22   | 0      | 320.03    | 6068.23 | 54.12      | 6.69  | 23.47 | 64.09 | 12.44 |                   |            |

Table D.1 cont'd

| Site | Transect | Quadrat | Date      | Latitude | Longitude | Canopy | Herb | Sedge | Stem | Burrow | Elevation | Solar   | Water_dist | CTI   | Sand  | Silt  | Clay  | Burrow_ownership  | Water_trns |
|------|----------|---------|-----------|----------|-----------|--------|------|-------|------|--------|-----------|---------|------------|-------|-------|-------|-------|-------------------|------------|
| 239  | 239      | 1146    | 4/2/2015  | 34.36409 | -94.10996 | 6      | 20   | 0     | 4    | 0      | 333.08    | 6104.82 | 392.31     | 6.53  | 22.59 | 65.96 | 11.45 |                   |            |
| 239  | 239      | 1147    | 4/2/2015  | 34.36409 | -94.10996 | 44     | 95   | 1     | 32   | 0      | 332.69    | 6102.92 | 396.72     | 7.21  | 22.59 | 65.96 | 11.45 |                   |            |
| 239  | 239      | 1148    | 4/2/2015  | 34.36409 | -94.10996 | 8      | 85   | 0     | 35   | 0      | 332.86    | 6099.65 | 401.27     | 6.84  | 22.59 | 65.96 | 11.45 |                   |            |
| 239  | 239      | 1149    | 4/2/2015  | 34.36409 | -94.10996 | 98     | 78   | 0     | 8    | 0      | 332.86    | 6099.65 | 406.07     | 6.84  | 22.59 | 65.96 | 11.45 |                   |            |
| 239  | 239      | 1150    | 4/2/2015  | 34.36409 | -94.10996 | 100    | 45   | 1     | 2    | 0      | 332.57    | 6097.50 | 411.00     | 9.90  | 22.59 | 65.96 | 11.45 |                   |            |
| 239  | 239      | 1151    | 4/2/2015  | 34.36409 | -94.10996 | 80     | 65   | 1     | 28   | 0      | 332.24    | 6095.86 | 416.16     | 10.18 | 22.59 | 65.96 | 11.45 |                   |            |
| 241  | 241      | 1152    | 4/15/2015 | 34.60992 | -94.11887 | 45     | 75   | 0     | 12   | 0      | 303.83    | 6087.03 | 43.85      | 8.31  | 31.30 | 52.55 | 16.15 |                   |            |
| 241  | 241      | 1153    | 4/15/2015 | 34.60992 | -94.11887 | 43     | 90   | 0     | 19   | 0      | 303.75    | 6087.22 | 52.17      | 6.58  | 31.30 | 52.55 | 16.15 |                   |            |
| 241  | 241      | 1154    | 4/15/2015 | 34.60992 | -94.11887 | 50     | 90   | 1     | 4    | 0      | 303.57    | 6087.31 | 60.94      | 8.17  | 31.30 | 52.55 | 16.15 |                   |            |
| 241  | 241      | 1155    | 4/15/2015 | 34.60992 | -94.11887 | 2      | 95   | 0     | 29   | 0      | 303.36    | 6086.77 | 69.89      | 7.93  | 31.30 | 52.55 | 16.15 |                   |            |
| 241  | 241      | 1156    | 4/15/2015 | 34.60992 | -94.11887 | 89     | 90   | 0     | 32   | 0      | 303.09    | 6086.10 | 78.85      | 8.49  | 31.30 | 52.55 | 16.15 |                   |            |
| 241  | 241      | 1157    | 4/15/2015 | 34.60992 | -94.11887 | 86     | 98   | 1     | 25   | 0      | 302.99    | 6086.35 | 87.99      | 7.56  | 31.30 | 52.55 | 16.15 |                   |            |
| 243  | 243      | 1158    | 4/12/2015 | 34.48455 | -93.96854 | 40     | 100  | 1     | 32   | 0      | 312.43    | 6055.25 | 121.95     | 7.53  | 34.00 | 52.96 | 13.05 |                   |            |
| 243  | 243      | 1159    | 4/12/2015 | 34.48455 | -93.96854 | 85     | 90   | 0     | 26   | 0      | 312.84    | 6054.75 | 129.03     | 6.84  | 34.00 | 52.96 | 13.05 |                   |            |
| 243  | 243      | 1160    | 4/12/2015 | 34.48455 | -93.96854 | 22     | 95   | 1     | 37   | 0      | 313.17    | 6052.17 | 136.18     | 11.39 | 34.00 | 52.96 | 13.05 |                   |            |
| 243  | 243      | 1161    | 4/12/2015 | 34.48455 | -93.96854 | 70     | 85   | 1     | 7    | 0      | 313.46    | 6051.17 | 143.34     | 7.32  | 34.00 | 52.96 | 13.05 |                   |            |
| 243  | 243      | 1162    | 4/12/2015 | 34.48455 | -93.96854 | 60     | 65   | 0     | 7    | 0      | 313.84    | 6047.42 | 150.43     | 7.17  | 34.00 | 52.96 | 13.05 |                   |            |
| 243  | 243      | 1163    | 4/12/2015 | 34.48455 | -93.96854 | 80     | 90   | 1     | 26   | 0      | 314.30    | 6047.21 | 157.51     | 7.14  | 34.00 | 52.96 | 13.05 |                   |            |
| 245  | 245      | 1164    | 4/9/2015  | 34.55144 | -94.34115 | 0      | 0    | 0     | 0    | 0      | 281.51    | 6063.31 | 19.50      | 7.60  | 40.99 | 47.79 | 11.21 |                   |            |
| 245  | 245      | 1165    | 4/9/2015  | 34.55144 | -94.34115 | 0      | 30   | 0     | 16   | 0      | 281.50    | 6062.41 | 28.11      | 8.61  | 40.99 | 47.79 | 11.21 |                   |            |
| 245  | 245      | 1166    | 4/9/2015  | 34.55144 | -94.34115 | 0      | 25   | 1     | 17   | 0      | 281.68    | 6062.63 | 37.33      | 8.34  | 40.99 | 47.79 | 11.21 |                   |            |
| 245  | 245      | 1167    | 4/9/2015  | 34.55144 | -94.34115 | 16     | 20   | 0     | 13   | 0      | 281.75    | 6062.12 | 46.91      | 13.59 | 40.99 | 47.79 | 11.21 |                   |            |
| 245  | 245      | 1168    | 4/9/2015  | 34.55144 | -94.34115 | 52     | 15   | 0     | 4    | 0      | 281.75    | 6062.12 | 56.46      | 13.59 | 40.99 | 47.79 | 11.21 |                   |            |
| 245  | 245      | 1169    | 4/9/2015  | 34.55144 | -94.34115 | 17     | 45   | 0     | 11   | 0      | 281.91    | 6062.67 | 65.94      | 10.50 | 40.99 | 47.79 | 11.21 |                   |            |
| 247  | 247      | 1170    | 4/9/2015  | 34.55140 | -94.30366 | 0      | 85   | 1     | 92   | 4      | 305.95    | 6056.27 | 134.58     | 7.38  | 24.99 | 63.65 | 11.35 | <i>P. reimeri</i> |            |
| 247  | 247      | 1171    | 4/9/2015  | 34.55140 | -94.30366 | 0      | 77   | 1     | 27   | 2      | 306.10    | 6052.73 | 141.86     | 7.55  | 24.99 | 63.65 | 11.35 | <i>P. reimeri</i> |            |
| 247  | 247      | 1172    | 4/9/2015  | 34.55140 | -94.30366 | 0      | 85   | 1     | 27   | 2      | 306.79    | 6060.97 | 149.43     | 6.61  | 24.99 | 63.65 | 11.35 | <i>P. reimeri</i> |            |

**Table D.1 cont'd**

| Site | Transect | Quadrat | Date      | Latitude | Longitude | Canopy | Herb | Sedge | Stem | Burrow | Elevation | Solar   | Water_dist | CTI   | Sand  | Silt  | Clay  | Burrow ownership  | Water_trns |
|------|----------|---------|-----------|----------|-----------|--------|------|-------|------|--------|-----------|---------|------------|-------|-------|-------|-------|-------------------|------------|
| 247  | 247      | 1173    | 4/9/2015  | 34.55140 | -94.30366 | 0      | 86   | 1     | 48   | 1      | 307.05    | 6051.87 | 157.13     | 6.14  | 24.99 | 63.65 | 11.35 | <i>P. reimeri</i> |            |
| 247  | 247      | 1174    | 4/9/2015  | 34.55140 | -94.30366 | 8      | 90   | 0     | 64   | 0      | 308.10    | 6060.34 | 164.84     | 6.23  | 24.99 | 63.65 | 11.35 |                   |            |
| 247  | 247      | 1175    | 4/9/2015  | 34.55140 | -94.30366 | 0      | 88   | 1     | 47   | 0      | 308.49    | 6065.66 | 172.76     | 6.59  | 24.99 | 63.65 | 11.35 |                   |            |
| 249  | 249      | 1176    | 4/14/2015 | 34.69905 | -94.38186 | 1      | 78   | 1     | 27   | 0      | 448.56    | 6105.86 | 68.99      | 6.17  | 46.46 | 46.22 | 7.32  |                   |            |
| 249  | 249      | 1177    | 4/14/2015 | 34.69905 | -94.38186 | 0      | 70   | 1     | 24   | 0      | 448.32    | 6105.41 | 70.92      | 8.55  | 46.46 | 46.22 | 7.32  |                   |            |
| 249  | 249      | 1178    | 4/14/2015 | 34.69905 | -94.38186 | 7      | 65   | 1     | 23   | 0      | 448.90    | 6108.31 | 72.74      | 8.17  | 46.46 | 46.22 | 7.32  |                   |            |
| 249  | 249      | 1179    | 4/14/2015 | 34.69905 | -94.38186 | 6      | 85   | 1     | 19   | 0      | 448.69    | 6105.18 | 74.15      | 6.11  | 46.46 | 46.22 | 7.32  |                   |            |
| 249  | 249      | 1180    | 4/14/2015 | 34.69905 | -94.38186 | 7      | 90   | 1     | 14   | 0      | 448.80    | 6104.16 | 75.60      | 9.09  | 46.46 | 46.22 | 7.32  |                   |            |
| 249  | 249      | 1181    | 4/14/2015 | 34.69905 | -94.38186 | 1      | 65   | 1     | 12   | 0      | 448.58    | 6105.34 | 75.94      | 8.36  | 46.46 | 46.22 | 7.32  |                   |            |
| 251  | 251      | 1182    | 4/15/2015 | 34.66298 | -94.26706 | 30     | 90   | 1     | 22   | 0      | 408.48    | 6117.65 | 61.98      | 12.02 | 39.35 | 48.97 | 11.68 |                   |            |
| 251  | 251      | 1183    | 4/15/2015 | 34.66298 | -94.26706 | 35     | 95   | 1     | 35   | 0      | 408.56    | 6111.54 | 59.02      | 7.68  | 39.35 | 48.97 | 11.68 |                   |            |
| 251  | 251      | 1184    | 4/15/2015 | 34.66298 | -94.26706 | 37     | 95   | 1     | 13   | 0      | 408.52    | 6111.05 | 56.17      | 10.15 | 39.35 | 48.97 | 11.68 |                   |            |
| 251  | 251      | 1185    | 4/15/2015 | 34.66298 | -94.26706 | 31     | 98   | 0     | 42   | 0      | 408.52    | 6114.16 | 53.40      | 10.79 | 39.35 | 48.97 | 11.68 |                   |            |
| 251  | 251      | 1186    | 4/15/2015 | 34.66298 | -94.26706 | 42     | 45   | 0     | 9    | 0      | 408.58    | 6113.18 | 51.24      | 7.78  | 39.35 | 48.97 | 11.68 |                   |            |
| 251  | 251      | 1187    | 4/15/2015 | 34.66298 | -94.26706 | 39     | 97   | 0     | 36   | 0      | 408.58    | 6112.26 | 49.12      | 7.77  | 39.35 | 48.97 | 11.68 |                   |            |
| 253  | 253      | 1188    | 4/11/2015 | 34.52831 | -94.03785 | 9      | 65   | 0     | 14   | 0      | 289.89    | 6032.45 | 63.44      | 11.11 | 23.47 | 64.09 | 12.44 |                   |            |
| 253  | 253      | 1189    | 4/11/2015 | 34.52831 | -94.03785 | 7      | 90   | 0     | 37   | 0      | 289.68    | 6038.71 | 57.87      | 9.39  | 23.47 | 64.09 | 12.44 |                   |            |
| 253  | 253      | 1190    | 4/11/2015 | 34.52831 | -94.03785 | 2      | 95   | 0     | 27   | 0      | 289.53    | 6039.14 | 52.67      | 8.94  | 23.47 | 64.09 | 12.44 |                   |            |
| 253  | 253      | 1191    | 4/11/2015 | 34.52831 | -94.03785 | 1      | 88   | 1     | 17   | 0      | 289.37    | 6038.74 | 48.44      | 8.98  | 23.47 | 64.09 | 12.44 |                   |            |
| 253  | 253      | 1192    | 4/11/2015 | 34.52831 | -94.03785 | 2      | 80   | 1     | 39   | 0      | 289.25    | 6040.18 | 44.99      | 7.91  | 23.47 | 64.09 | 12.44 |                   |            |
| 253  | 253      | 1193    | 4/11/2015 | 34.52831 | -94.03785 | 4      | 95   | 0     | 27   | 0      | 289.23    | 6041.45 | 42.86      | 8.89  | 23.47 | 64.09 | 12.44 |                   |            |
| 255  | 255      | 1194    | 4/15/2015 | 34.58909 | -94.05024 | 0      | 95   | 1     | 17   | 0      | 286.04    | 6074.95 | 78.02      | 7.52  | 29.06 | 57.83 | 13.11 |                   |            |
| 255  | 255      | 1195    | 4/15/2015 | 34.58909 | -94.05024 | 0      | 96   | 0     | 14   | 0      | 286.32    | 6072.18 | 78.37      | 7.43  | 29.06 | 57.83 | 13.11 |                   |            |
| 255  | 255      | 1196    | 4/15/2015 | 34.58909 | -94.05024 | 0      | 98   | 0     | 19   | 0      | 286.32    | 6070.31 | 79.36      | 10.94 | 29.06 | 57.83 | 13.11 |                   |            |
| 255  | 255      | 1197    | 4/15/2015 | 34.58909 | -94.05024 | 16     | 100  | 0     | 21   | 0      | 286.52    | 6072.22 | 81.25      | 9.09  | 29.06 | 57.83 | 13.11 |                   |            |
| 255  | 255      | 1198    | 4/15/2015 | 34.58909 | -94.05024 | 43     | 80   | 0     | 19   | 0      | 286.71    | 6072.10 | 84.33      | 7.56  | 29.06 | 57.83 | 13.11 |                   |            |
| 255  | 255      | 1199    | 4/15/2015 | 34.58909 | -94.05024 | 48     | 96   | 0     | 18   | 0      | 286.82    | 6071.17 | 88.26      | 8.56  | 29.06 | 57.83 | 13.11 |                   |            |

**Table D.1 cont'd**

| Site | Transect | Quadrat | Date      | Latitude | Longitude | Canopy | Herb | Sedge | Stem | Burrow | Elevation | Solar   | Water dist | CTI   | Sand  | Silt  | Clay  | Burrow ownership | Water_trns |
|------|----------|---------|-----------|----------|-----------|--------|------|-------|------|--------|-----------|---------|------------|-------|-------|-------|-------|------------------|------------|
| 257  | 257      | 1200    | 4/18/2015 | 34.42169 | -94.45216 | 1      | 65   | 1     | 7    | 0      | 286.45    | 6068.99 | 78.80      | 7.81  | 13.11 | 73.70 | 13.19 |                  |            |
| 257  | 257      | 1201    | 4/18/2015 | 34.42169 | -94.45216 | 0      | 95   | 0     | 22   | 0      | 286.45    | 6069.26 | 79.47      | 7.94  | 13.11 | 73.70 | 13.19 |                  |            |
| 257  | 257      | 1202    | 4/18/2015 | 34.42169 | -94.45216 | 31     | 65   | 0     | 19   | 0      | 286.60    | 6072.89 | 75.62      | 8.29  | 13.11 | 73.70 | 13.19 |                  |            |
| 257  | 257      | 1203    | 4/18/2015 | 34.42169 | -94.45216 | 80     | 20   | 0     | 8    | 0      | 286.87    | 6074.51 | 71.79      | 7.62  | 13.11 | 73.70 | 13.19 |                  |            |
| 257  | 257      | 1204    | 4/18/2015 | 34.42169 | -94.45216 | 62     | 35   | 0     | 6    | 0      | 287.24    | 6074.72 | 68.01      | 6.97  | 13.11 | 73.70 | 13.19 |                  |            |
| 257  | 257      | 1205    | 4/18/2015 | 34.42169 | -94.45216 | 40     | 80   | 0     | 13   | 0      | 287.47    | 6073.40 | 65.36      | 7.15  | 13.11 | 73.70 | 13.19 |                  |            |
| 259  | 259      | 1206    | 4/15/2015 | 34.58384 | -94.14469 | 0      | 65   | 1     | 7    | 0      | 292.28    | 6075.70 | 67.54      | 7.48  | 31.67 | 56.99 | 11.34 |                  |            |
| 259  | 259      | 1207    | 4/15/2015 | 34.58384 | -94.14469 | 0      | 70   | 1     | 6    | 0      | 292.19    | 6075.28 | 64.47      | 8.57  | 31.67 | 56.99 | 11.34 |                  |            |
| 259  | 259      | 1208    | 4/15/2015 | 34.58384 | -94.14469 | 0      | 80   | 1     | 6    | 0      | 292.12    | 6075.08 | 62.87      | 8.25  | 31.67 | 56.99 | 11.34 |                  |            |
| 259  | 259      | 1209    | 4/15/2015 | 34.58384 | -94.14469 | 0      | 78   | 1     | 13   | 0      | 292.10    | 6074.37 | 62.31      | 7.71  | 31.67 | 56.99 | 11.34 |                  |            |
| 259  | 259      | 1210    | 4/15/2015 | 34.58384 | -94.14469 | 0      | 95   | 1     | 11   | 0      | 292.13    | 6072.18 | 62.25      | 7.99  | 31.67 | 56.99 | 11.34 |                  |            |
| 259  | 259      | 1211    | 4/15/2015 | 34.58384 | -94.14469 | 0      | 90   | 1     | 8    | 0      | 292.01    | 6071.88 | 61.69      | 14.66 | 31.67 | 56.99 | 11.34 |                  |            |
| 261  | 261      | 1212    | 4/2/2015  | 34.31176 | -93.96832 | 0      | 30   | 0     | 0    | 0      | 298.77    | 6071.29 | 159.46     | 8.33  | 30.88 | 55.90 | 13.22 |                  |            |
| 261  | 261      | 1213    | 4/2/2015  | 34.31176 | -93.96832 | 0      | 15   | 0     | 3    | 0      | 298.77    | 6074.04 | 158.23     | 8.26  | 30.88 | 55.90 | 13.22 |                  |            |
| 261  | 261      | 1214    | 4/2/2015  | 34.31176 | -93.96832 | 0      | 3    | 0     | 5    | 0      | 298.73    | 6073.17 | 157.14     | 9.58  | 30.88 | 55.90 | 13.22 |                  |            |
| 261  | 261      | 1215    | 4/2/2015  | 34.31176 | -93.96832 | 0      | 15   | 0     | 0    | 0      | 298.75    | 6069.67 | 156.76     | 7.52  | 30.88 | 55.90 | 13.22 |                  |            |
| 261  | 261      | 1216    | 4/2/2015  | 34.31176 | -93.96832 | 0      | 35   | 0     | 27   | 0      | 298.38    | 6056.87 | 156.94     | 6.67  | 30.88 | 55.90 | 13.22 |                  |            |
| 261  | 261      | 1217    | 4/2/2015  | 34.31176 | -93.96832 | 2      | 78   | 0     | 22   | 0      | 297.76    | 6058.71 | 157.89     | 7.34  | 30.88 | 55.90 | 13.22 |                  |            |
| 263  | 263      | 1218    | 3/23/2015 | 34.89122 | -92.92284 | 100    | 0    | 0     | 0    | 0      | 300.80    | 6077.18 | 103.88     | 8.32  | 23.21 | 65.81 | 10.98 |                  |            |
| 263  | 263      | 1219    | 3/23/2015 | 34.89122 | -92.92284 | 100    | 0    | 0     | 0    | 0      | 300.78    | 6077.08 | 104.92     | 8.28  | 23.21 | 65.81 | 10.98 |                  |            |
| 263  | 263      | 1220    | 3/23/2015 | 34.89122 | -92.92284 | 100    | 2    | 0     | 0    | 0      | 300.71    | 6077.36 | 106.90     | 8.21  | 23.21 | 65.81 | 10.98 |                  |            |
| 263  | 263      | 1221    | 3/23/2015 | 34.89122 | -92.92284 | 100    | 2    | 0     | 0    | 0      | 300.74    | 6077.49 | 109.16     | 8.12  | 23.21 | 65.81 | 10.98 |                  |            |
| 263  | 263      | 1222    | 3/23/2015 | 34.89122 | -92.92284 | 100    | 1    | 0     | 0    | 0      | 300.80    | 6077.35 | 111.47     | 8.17  | 23.21 | 65.81 | 10.98 |                  |            |
| 263  | 263      | 1223    | 3/23/2015 | 34.89122 | -92.92284 | 100    | 5    | 1     | 0    | 0      | 300.69    | 6077.06 | 114.35     | 8.04  | 23.21 | 65.81 | 10.98 |                  |            |
| 265  | 265      | 1224    | 4/15/2015 | 34.56628 | -94.10775 | 16     | 80   | 0     | 21   | 0      | 292.74    | 6065.88 | 81.11      | 8.30  | 29.06 | 57.83 | 13.11 |                  |            |
| 265  | 265      | 1225    | 4/15/2015 | 34.56628 | -94.10775 | 32     | 98   | 0     | 20   | 0      | 292.74    | 6065.88 | 91.00      | 8.30  | 29.06 | 57.83 | 13.11 |                  |            |
| 265  | 265      | 1226    | 4/15/2015 | 34.56628 | -94.10775 | 5      | 80   | 0     | 27   | 0      | 292.90    | 6067.05 | 100.84     | 7.73  | 29.06 | 57.83 | 13.11 |                  |            |



**Table D.1 cont'd**

| Site | Transect | Quadrat | Date      | Latitude | Longitude | Canopy | Herb | Sedge | Stem | Burrow | Elevation | Solar   | Water_dist | CTI   | Sand  | Silt  | Clay  | Burrow ownership  | Water_trns |
|------|----------|---------|-----------|----------|-----------|--------|------|-------|------|--------|-----------|---------|------------|-------|-------|-------|-------|-------------------|------------|
| 265  | 265      | 1227    | 4/15/2015 | 34.56628 | -94.10775 | 8      | 97   | 1     | 27   | 0      | 292.95    | 6068.87 | 110.73     | 9.96  | 29.06 | 57.83 | 13.11 |                   |            |
| 265  | 265      | 1228    | 4/15/2015 | 34.56628 | -94.10775 | 11     | 83   | 0     | 42   | 0      | 292.95    | 6069.13 | 120.68     | 7.98  | 29.06 | 57.83 | 13.11 |                   |            |
| 265  | 265      | 1229    | 4/15/2015 | 34.56628 | -94.10775 | 4      | 90   | 1     | 27   | 0      | 292.81    | 6070.10 | 130.58     | 9.12  | 29.06 | 57.83 | 13.11 |                   |            |
| 267  | 267      | 1230    | 4/19/2015 | 34.32731 | -94.33955 | 0      | 98   | 0     | 61   | 0      | 357.64    | 6117.54 | 171.94     | 6.68  | 37.95 | 50.40 | 11.64 |                   |            |
| 267  | 267      | 1231    | 4/19/2015 | 34.32731 | -94.33955 | 0      | 97   | 0     | 72   | 0      | 357.64    | 6117.54 | 181.89     | 6.68  | 37.95 | 50.40 | 11.64 |                   |            |
| 267  | 267      | 1232    | 4/19/2015 | 34.32731 | -94.33955 | 0      | 96   | 0     | 28   | 0      | 357.70    | 6117.56 | 191.90     | 6.59  | 37.95 | 50.40 | 11.64 |                   |            |
| 267  | 267      | 1233    | 4/19/2015 | 34.32731 | -94.33955 | 0      | 96   | 0     | 98   | 0      | 358.46    | 6122.41 | 201.86     | 8.19  | 37.95 | 50.40 | 11.64 |                   |            |
| 267  | 267      | 1234    | 4/19/2015 | 34.32731 | -94.33955 | 0      | 96   | 0     | 86   | 0      | 359.07    | 6122.75 | 211.87     | 5.92  | 37.95 | 50.40 | 11.64 |                   |            |
| 267  | 267      | 1235    | 4/19/2015 | 34.32731 | -94.33955 | 0      | 98   | 0     | 18   | 0      | 359.83    | 6125.75 | 221.83     | 6.15  | 37.95 | 50.40 | 11.64 |                   |            |
| 269  | 269      | 1236    | 4/15/2015 | 34.57042 | -94.17729 | 0      | 85   | 1     | 4    | 1      | 303.60    | 6070.99 | 171.45     | 8.13  | 31.67 | 56.99 | 11.34 | <i>P. reimeri</i> |            |
| 269  | 269      | 1237    | 4/15/2015 | 34.57042 | -94.17729 | 1      | 45   | 1     | 6    | 1      | 303.65    | 6071.80 | 170.67     | 9.77  | 31.67 | 56.99 | 11.34 | <i>P. reimeri</i> |            |
| 269  | 269      | 1238    | 4/15/2015 | 34.57042 | -94.17729 | 0      | 45   | 1     | 11   | 0      | 303.85    | 6073.96 | 170.48     | 9.98  | 31.67 | 56.99 | 11.34 |                   |            |
| 269  | 269      | 1239    | 4/15/2015 | 34.57042 | -94.17729 | 0      | 80   | 1     | 14   | 0      | 304.02    | 6076.33 | 170.87     | 9.88  | 31.67 | 56.99 | 11.34 |                   |            |
| 269  | 269      | 1240    | 4/15/2015 | 34.57042 | -94.17729 | 0      | 65   | 1     | 15   | 0      | 304.26    | 6077.18 | 171.84     | 9.56  | 31.67 | 56.99 | 11.34 |                   |            |
| 269  | 269      | 1241    | 4/15/2015 | 34.57042 | -94.17729 | 0      | 95   | 0     | 16   | 0      | 304.53    | 6078.43 | 173.38     | 9.66  | 31.67 | 56.99 | 11.34 |                   |            |
| 271  | 271      | 1242    | 4/14/2015 | 34.60773 | -94.16734 | 0      | 90   | 1     | 36   | 2      | 293.79    | 6072.51 | 138.35     | 8.36  | 31.67 | 56.99 | 11.34 | <i>P. reimeri</i> |            |
| 271  | 271      | 1243    | 4/14/2015 | 34.60773 | -94.16734 | 0      | 80   | 1     | 23   | 1      | 293.61    | 6072.41 | 128.40     | 8.78  | 31.67 | 56.99 | 11.34 | <i>P. reimeri</i> |            |
| 271  | 271      | 1244    | 4/14/2015 | 34.60773 | -94.16734 | 0      | 100  | 1     | 42   | 0      | 293.67    | 6071.72 | 118.38     | 8.45  | 31.67 | 56.99 | 11.34 |                   |            |
| 271  | 271      | 1245    | 4/14/2015 | 34.60773 | -94.16734 | 0      | 95   | 1     | 46   | 0      | 293.59    | 6071.93 | 108.35     | 8.11  | 31.67 | 56.99 | 11.34 |                   |            |
| 271  | 271      | 1246    | 4/14/2015 | 34.60773 | -94.16734 | 0      | 95   | 1     | 33   | 0      | 293.50    | 6071.72 | 98.38      | 11.01 | 31.67 | 56.99 | 11.34 |                   |            |
| 271  | 271      | 1247    | 4/14/2015 | 34.60773 | -94.16734 | 0      | 85   | 1     | 26   | 0      | 293.47    | 6073.03 | 88.41      | 11.64 | 31.67 | 56.99 | 11.34 |                   |            |
| 273  | 273      | 1248    | 4/17/2015 | 34.47988 | -94.43716 | 21     | 75   | 0     | 3    | 0      | 314.30    | 6094.29 | 271.10     | 6.25  | 15.85 | 64.74 | 19.40 |                   |            |
| 273  | 273      | 1249    | 4/17/2015 | 34.47988 | -94.43716 | 31     | 55   | 0     | 0    | 0      | 314.50    | 6094.38 | 264.66     | 7.99  | 15.85 | 64.74 | 19.40 |                   |            |
| 273  | 273      | 1250    | 4/17/2015 | 34.47988 | -94.43716 | 4      | 60   | 0     | 6    | 0      | 314.73    | 6093.56 | 258.07     | 6.58  | 15.85 | 64.74 | 19.40 |                   |            |
| 273  | 273      | 1251    | 4/17/2015 | 34.47988 | -94.43716 | 21     | 70   | 0     | 3    | 0      | 314.97    | 6093.75 | 251.63     | 6.93  | 15.85 | 64.74 | 19.40 |                   |            |
| 273  | 273      | 1252    | 4/17/2015 | 34.47988 | -94.43716 | 30     | 65   | 0     | 4    | 0      | 315.07    | 6093.46 | 245.20     | 7.21  | 15.85 | 64.74 | 19.40 |                   |            |
| 273  | 273      | 1253    | 4/17/2015 | 34.47988 | -94.43716 | 24     | 80   | 0     | 19   | 0      | 315.24    | 6092.84 | 238.90     | 7.19  | 15.85 | 64.74 | 19.40 |                   |            |

Table D.1 cont'd

| Site | Transect | Quadrat | Date      | Latitude | Longitude | Canopy | Herb | Sedge | Stem | Burrow | Elevation | Solar   | Water_dist | CTI   | Sand  | Silt  | Clay  | Burrow ownership  | Water_trns |
|------|----------|---------|-----------|----------|-----------|--------|------|-------|------|--------|-----------|---------|------------|-------|-------|-------|-------|-------------------|------------|
| 275  | 275      | 1254    | 4/11/2015 | 34.50260 | -94.02230 | 0      | 45   | 1     | 41   | 0      | 326.17    | 6077.60 | 117.14     | 6.99  | 23.47 | 64.09 | 12.44 |                   |            |
| 275  | 275      | 1255    | 4/11/2015 | 34.50260 | -94.02230 | 0      | 80   | 1     | 6    | 0      | 326.17    | 6083.74 | 116.69     | 6.43  | 23.47 | 64.09 | 12.44 |                   |            |
| 275  | 275      | 1256    | 4/11/2015 | 34.50260 | -94.02230 | 0      | 85   | 1     | 22   | 0      | 325.83    | 6083.36 | 117.17     | 8.67  | 23.47 | 64.09 | 12.44 |                   |            |
| 275  | 275      | 1257    | 4/11/2015 | 34.50260 | -94.02230 | 0      | 80   | 1     | 21   | 0      | 325.73    | 6080.80 | 118.51     | 7.68  | 23.47 | 64.09 | 12.44 |                   |            |
| 275  | 275      | 1258    | 4/11/2015 | 34.50260 | -94.02230 | 1      | 90   | 0     | 24   | 0      | 325.27    | 6077.45 | 120.67     | 7.69  | 23.47 | 64.09 | 12.44 |                   |            |
| 275  | 275      | 1259    | 4/11/2015 | 34.50260 | -94.02230 | 6      | 90   | 1     | 17   | 0      | 325.24    | 6073.52 | 123.60     | 7.60  | 23.47 | 64.09 | 12.44 |                   |            |
| 277  | 277      | 1260    | 4/21/2015 | 34.31052 | -94.41735 | 9      | 65   | 0     | 7    | 0      | 372.14    | 6119.89 | 289.44     | 8.05  | 34.00 | 54.29 | 11.71 |                   |            |
| 277  | 277      | 1261    | 4/21/2015 | 34.31052 | -94.41735 | 5      | 70   | 0     | 5    | 0      | 372.14    | 6118.25 | 282.79     | 6.98  | 34.00 | 54.29 | 11.71 |                   |            |
| 277  | 277      | 1262    | 4/21/2015 | 34.31052 | -94.41735 | 10     | 80   | 0     | 6    | 0      | 372.06    | 6116.08 | 276.34     | 7.61  | 34.00 | 54.29 | 11.71 |                   |            |
| 277  | 277      | 1263    | 4/21/2015 | 34.31052 | -94.41735 | 2      | 65   | 0     | 4    | 0      | 371.99    | 6104.17 | 270.19     | 7.26  | 34.00 | 54.29 | 11.71 |                   |            |
| 277  | 277      | 1264    | 4/21/2015 | 34.31052 | -94.41735 | 11     | 55   | 0     | 7    | 0      | 371.35    | 6089.87 | 264.20     | 7.35  | 34.00 | 54.29 | 11.71 |                   |            |
| 277  | 277      | 1265    | 4/21/2015 | 34.31052 | -94.41735 | 18     | 55   | 0     | 10   | 0      | 370.80    | 6094.48 | 258.45     | 8.87  | 34.00 | 54.29 | 11.71 |                   |            |
| 279  | 279      | 1266    | 4/14/2015 | 34.64384 | -94.20309 | 0      | 85   | 1     | 46   | 2      | 330.69    | 6086.65 | 260.74     | 9.52  | 39.35 | 48.97 | 11.68 | <i>P. reimeri</i> |            |
| 279  | 279      | 1267    | 4/14/2015 | 34.64384 | -94.20309 | 0      | 90   | 1     | 49   | 1      | 330.74    | 6085.83 | 263.74     | 8.13  | 39.35 | 48.97 | 11.68 | <i>P. reimeri</i> |            |
| 279  | 279      | 1268    | 4/14/2015 | 34.64384 | -94.20309 | 0      | 80   | 0     | 13   | 0      | 330.73    | 6086.18 | 263.12     | 8.95  | 39.35 | 48.97 | 11.68 |                   |            |
| 279  | 279      | 1269    | 4/14/2015 | 34.64384 | -94.20309 | 0      | 75   | 1     | 37   | 0      | 330.74    | 6086.96 | 261.43     | 9.77  | 39.35 | 48.97 | 11.68 |                   |            |
| 279  | 279      | 1270    | 4/14/2015 | 34.64384 | -94.20309 | 0      | 85   | 1     | 36   | 0      | 330.74    | 6086.96 | 259.97     | 9.77  | 39.35 | 48.97 | 11.68 |                   |            |
| 279  | 279      | 1271    | 4/14/2015 | 34.64384 | -94.20309 | 0      | 90   | 1     | 46   | 0      | 330.73    | 6089.20 | 258.02     | 13.05 | 39.35 | 48.97 | 11.68 |                   |            |
| 282  | 282      | 1272    | 3/24/2015 | 34.50892 | -93.16727 | 56     | 95   | 0     | 52   | 0      | 142.35    | 5977.61 | 99.54      | 7.04  | 18.31 | 65.67 | 16.02 |                   |            |
| 282  | 282      | 1273    | 3/24/2015 | 34.50892 | -93.16727 | 60     | 100  | 0     | 48   | 0      | 142.10    | 5982.97 | 89.57      | 7.31  | 18.31 | 65.67 | 16.02 |                   |            |
| 282  | 282      | 1274    | 3/24/2015 | 34.50892 | -93.16727 | 99     | 100  | 0     | 20   | 0      | 141.67    | 5984.37 | 79.61      | 7.28  | 18.31 | 65.67 | 16.02 |                   |            |
| 282  | 282      | 1275    | 3/24/2015 | 34.50892 | -93.16727 | 80     | 100  | 0     | 47   | 0      | 140.90    | 5982.19 | 69.53      | 7.41  | 18.31 | 65.67 | 16.02 |                   |            |
| 282  | 282      | 1276    | 3/24/2015 | 34.50892 | -93.16727 | 60     | 100  | 0     | 25   | 0      | 140.16    | 5981.47 | 59.56      | 7.86  | 18.31 | 65.67 | 16.02 |                   |            |
| 282  | 282      | 1277    | 3/24/2015 | 34.50892 | -93.16727 | 52     | 100  | 0     | 34   | 0      | 139.74    | 5977.39 | 49.59      | 9.37  | 18.31 | 65.67 | 16.02 |                   |            |
| 283  | 283      | 1278    | 3/23/2015 | 34.93295 | -92.78596 | 0      | 56   | 0     | 15   | 0      | 238.73    | 6020.07 | 165.61     | 6.65  | 38.71 | 52.62 | 8.68  |                   |            |
| 283  | 283      | 1279    | 3/23/2015 | 34.93295 | -92.78596 | 0      | 55   | 0     | 33   | 0      | 238.99    | 6036.46 | 157.85     | 8.25  | 38.71 | 52.62 | 8.68  |                   |            |
| 283  | 283      | 1280    | 3/23/2015 | 34.93295 | -92.78596 | 0      | 75   | 0     | 29   | 0      | 238.95    | 6032.58 | 150.45     | 7.49  | 38.71 | 52.62 | 8.68  |                   |            |

**Table D.1 cont'd**

| Site | Transect | Quadrat | Date      | Latitude | Longitude | Canopy | Herb | Sedge | Stem | Burrow | Elevation | Solar   | Water_dist | CTI   | Sand  | Silt  | Clay  | Burrow ownership | Water_trns |
|------|----------|---------|-----------|----------|-----------|--------|------|-------|------|--------|-----------|---------|------------|-------|-------|-------|-------|------------------|------------|
| 283  | 283      | 1281    | 3/23/2015 | 34.93295 | -92.78596 | 0      | 25   | 0     | 25   | 0      | 238.93    | 6037.53 | 143.25     | 8.54  | 38.71 | 52.62 | 8.68  |                  |            |
| 283  | 283      | 1282    | 3/23/2015 | 34.93295 | -92.78596 | 0      | 30   | 0     | 5    | 0      | 238.88    | 6032.18 | 136.42     | 7.35  | 38.71 | 52.62 | 8.68  |                  |            |
| 283  | 283      | 1283    | 3/23/2015 | 34.93295 | -92.78596 | 0      | 20   | 0     | 5    | 0      | 238.83    | 6034.55 | 130.11     | 7.73  | 38.71 | 52.62 | 8.68  |                  |            |
| 287  | 287      | 1284    | 4/2/2015  | 34.25264 | -93.96960 | 92     | 5    | 0     | 2    | 0      | 258.79    | 6045.18 | 522.98     | 7.69  | 37.65 | 53.37 | 8.98  |                  |            |
| 287  | 287      | 1285    | 4/2/2015  | 34.25264 | -93.96960 | 96     | 5    | 0     | 2    | 0      | 258.38    | 6040.14 | 523.92     | 7.07  | 37.65 | 53.37 | 8.98  |                  |            |
| 287  | 287      | 1286    | 4/2/2015  | 34.25264 | -93.96960 | 43     | 5    | 0     | 2    | 0      | 259.35    | 6035.40 | 525.05     | 5.28  | 37.65 | 53.37 | 8.98  |                  |            |
| 287  | 287      | 1287    | 4/2/2015  | 34.25264 | -93.96960 | 78     | 48   | 0     | 23   | 0      | 259.81    | 6034.74 | 526.37     | 5.92  | 37.65 | 53.37 | 8.98  |                  |            |
| 287  | 287      | 1288    | 4/2/2015  | 34.25264 | -93.96960 | 76     | 10   | 0     | 0    | 0      | 258.54    | 6030.43 | 527.87     | 6.55  | 37.65 | 53.37 | 8.98  |                  |            |
| 287  | 287      | 1289    | 4/2/2015  | 34.25264 | -93.96960 | 100    | 5    | 0     | 0    | 0      | 258.54    | 6030.43 | 529.56     | 6.55  | 37.65 | 53.37 | 8.98  |                  |            |
| 288  | 288      | 1290    | 4/3/2015  | 34.10164 | -94.32694 | 0      | 80   | 1     | 33   | 0      | 179.89    | 5992.97 | 477.59     | 7.60  | 26.65 | 62.37 | 10.98 |                  |            |
| 288  | 288      | 1291    | 4/3/2015  | 34.10164 | -94.32694 | 0      | 80   | 0     | 57   | 0      | 179.09    | 5989.43 | 467.64     | 7.07  | 26.65 | 62.37 | 10.98 |                  |            |
| 288  | 288      | 1292    | 4/3/2015  | 34.10164 | -94.32694 | 0      | 90   | 1     | 33   | 0      | 178.76    | 5993.02 | 457.69     | 6.82  | 26.65 | 62.37 | 10.98 |                  |            |
| 288  | 288      | 1293    | 4/3/2015  | 34.10164 | -94.32694 | 0      | 80   | 1     | 28   | 0      | 178.49    | 5992.70 | 447.74     | 6.94  | 26.65 | 62.37 | 10.98 |                  |            |
| 288  | 288      | 1294    | 4/3/2015  | 34.10164 | -94.32694 | 0      | 95   | 0     | 54   | 0      | 178.25    | 5985.05 | 437.72     | 7.30  | 26.65 | 62.37 | 10.98 |                  |            |
| 288  | 288      | 1295    | 4/3/2015  | 34.10164 | -94.32694 | 0      | 85   | 0     | 22   | 0      | 177.96    | 5981.67 | 427.72     | 7.26  | 26.65 | 62.37 | 10.98 |                  |            |
| 290  | 290      | 1296    | 3/24/2015 | 34.54783 | -93.01835 | 52     | 30   | 1     | 0    | 0      | 206.76    | 5995.25 | 57.21      | 6.98  | 10.29 | 74.76 | 14.95 |                  |            |
| 290  | 290      | 1297    | 3/24/2015 | 34.54783 | -93.01835 | 28     | 100  | 1     | 36   | 0      | 206.73    | 5992.44 | 58.76      | 7.97  | 10.29 | 74.76 | 14.95 |                  |            |
| 290  | 290      | 1298    | 3/24/2015 | 34.54783 | -93.01835 | 20     | 80   | 1     | 6    | 0      | 206.73    | 5992.44 | 60.33      | 7.97  | 10.29 | 74.76 | 14.95 |                  |            |
| 290  | 290      | 1299    | 3/24/2015 | 34.54783 | -93.01835 | 8      | 100  | 1     | 26   | 0      | 206.86    | 5988.72 | 62.06      | 7.91  | 10.29 | 74.76 | 14.95 |                  |            |
| 290  | 290      | 1300    | 3/24/2015 | 34.54783 | -93.01835 | 16     | 80   | 1     | 7    | 0      | 207.49    | 5986.00 | 64.57      | 7.80  | 10.29 | 74.76 | 14.95 |                  |            |
| 290  | 290      | 1301    | 3/24/2015 | 34.54783 | -93.01835 | 4      | 75   | 1     | 14   | 0      | 207.32    | 5986.14 | 67.12      | 6.28  | 10.29 | 74.76 | 14.95 |                  |            |
| 292  | 292      | 1302    | 3/25/2015 | 34.52044 | -93.26630 | 44     | 100  | 0     | 39   | 0      | 162.85    | 5966.66 | 43.36      | 7.18  | 29.70 | 56.02 | 14.28 |                  |            |
| 292  | 292      | 1303    | 3/25/2015 | 34.52044 | -93.26630 | 52     | 80   | 0     | 42   | 0      | 163.53    | 5970.01 | 49.59      | 6.57  | 29.70 | 56.02 | 14.28 |                  |            |
| 292  | 292      | 1304    | 3/25/2015 | 34.52044 | -93.26630 | 52     | 60   | 0     | 25   | 0      | 163.65    | 5983.75 | 55.74      | 7.07  | 29.70 | 56.02 | 14.28 |                  |            |
| 292  | 292      | 1305    | 3/25/2015 | 34.52044 | -93.26630 | 16     | 100  | 0     | 37   | 0      | 163.42    | 5979.59 | 61.55      | 8.67  | 29.70 | 56.02 | 14.28 |                  |            |
| 292  | 292      | 1306    | 3/25/2015 | 34.52044 | -93.26630 | 12     | 90   | 0     | 12   | 0      | 163.77    | 5982.10 | 66.88      | 10.60 | 29.70 | 56.02 | 14.28 |                  |            |
| 292  | 292      | 1307    | 3/25/2015 | 34.52044 | -93.26630 | 44     | 100  | 0     | 7    | 0      | 164.00    | 5981.97 | 71.04      | 6.49  | 29.70 | 56.02 | 14.28 |                  |            |

**Table D.1 cont'd**

| Site | Transect | Quadrat | Date      | Latitude | Longitude | Canopy | Herb | Sedge | Stem | Burrow | Elevation | Solar   | Water_dist | CTI   | Sand  | Silt  | Clay  | Burrow ownership | Water_trns |
|------|----------|---------|-----------|----------|-----------|--------|------|-------|------|--------|-----------|---------|------------|-------|-------|-------|-------|------------------|------------|
| 294  | 294      | 1308    | 4/3/2015  | 34.18113 | -94.38779 | 0      | 65   | 0     | 0    | 0      | 204.64    | 5936.70 | 149.36     | 7.04  | 21.14 | 67.09 | 11.78 |                  |            |
| 294  | 294      | 1309    | 4/3/2015  | 34.18113 | -94.38779 | 0      | 55   | 0     | 6    | 0      | 203.84    | 5939.49 | 154.88     | 7.76  | 21.14 | 67.09 | 11.78 |                  |            |
| 294  | 294      | 1310    | 4/3/2015  | 34.18113 | -94.38779 | 0      | 20   | 0     | 32   | 0      | 203.00    | 5948.07 | 160.84     | 7.38  | 21.14 | 67.09 | 11.78 |                  |            |
| 294  | 294      | 1311    | 4/3/2015  | 34.18113 | -94.38779 | 0      | 65   | 0     | 13   | 0      | 203.43    | 5951.59 | 167.19     | 6.51  | 21.14 | 67.09 | 11.78 |                  |            |
| 294  | 294      | 1312    | 4/3/2015  | 34.18113 | -94.38779 | 0      | 70   | 0     | 12   | 0      | 203.02    | 5953.24 | 173.90     | 6.55  | 21.14 | 67.09 | 11.78 |                  |            |
| 294  | 294      | 1313    | 4/3/2015  | 34.18113 | -94.38779 | 0      | 65   | 0     | 22   | 0      | 203.36    | 5954.67 | 180.80     | 5.87  | 21.14 | 67.09 | 11.78 |                  |            |
| 296  | 296      | 1314    | 3/28/2015 | 34.17333 | -93.65472 | 0      | 85   | 1     | 37   | 1      | 192.44    | 5988.88 | 119.62     | 7.29  | 46.90 | 47.11 | 5.99  |                  |            |
| 296  | 296      | 1315    | 3/28/2015 | 34.17333 | -93.65472 | 0      | 45   | 1     | 12   | 0      | 193.23    | 5960.09 | 120.40     | 6.20  | 46.90 | 47.11 | 5.99  |                  |            |
| 296  | 296      | 1316    | 3/28/2015 | 34.17333 | -93.65472 | 0      | 70   | 0     | 7    | 0      | 194.99    | 5972.72 | 121.39     | 5.58  | 46.90 | 47.11 | 5.99  |                  |            |
| 296  | 296      | 1317    | 3/28/2015 | 34.17333 | -93.65472 | 1      | 25   | 1     | 5    | 0      | 195.49    | 6009.04 | 122.40     | 6.44  | 46.90 | 47.11 | 5.99  |                  |            |
| 296  | 296      | 1318    | 3/28/2015 | 34.17333 | -93.65472 | 1      | 55   | 1     | 27   | 0      | 195.76    | 6014.07 | 124.00     | 6.47  | 46.90 | 47.11 | 5.99  |                  |            |
| 296  | 296      | 1319    | 3/28/2015 | 34.17333 | -93.65472 | 2      | 80   | 1     | 3    | 0      | 195.86    | 6014.86 | 126.23     | 6.40  | 46.90 | 47.11 | 5.99  |                  |            |
| 297  | 297      | 1320    | 3/25/2015 | 34.70231 | -93.22823 | 80     | 35   | 0     | 3    | 0      | 234.77    | 5871.49 | 76.48      | 6.68  | 9.07  | 73.41 | 17.52 |                  |            |
| 297  | 297      | 1321    | 3/25/2015 | 34.70231 | -93.22823 | 100    | 15   | 0     | 1    | 0      | 235.74    | 5961.32 | 76.45      | 7.94  | 9.07  | 73.41 | 17.52 |                  |            |
| 297  | 297      | 1322    | 3/25/2015 | 34.70231 | -93.22823 | 96     | 45   | 0     | 16   | 0      | 234.81    | 5957.27 | 76.45      | 6.63  | 9.07  | 73.41 | 17.52 |                  |            |
| 297  | 297      | 1323    | 3/25/2015 | 34.70231 | -93.22823 | 94     | 15   | 0     | 0    | 0      | 234.80    | 5970.32 | 76.42      | 6.77  | 9.07  | 73.41 | 17.52 |                  |            |
| 297  | 297      | 1324    | 3/25/2015 | 34.70231 | -93.22823 | 80     | 5    | 0     | 0    | 0      | 234.76    | 5972.85 | 76.38      | 6.71  | 9.07  | 73.41 | 17.52 |                  |            |
| 297  | 297      | 1325    | 3/25/2015 | 34.70231 | -93.22823 | 76     | 8    | 0     | 12   | 0      | 233.65    | 5981.14 | 76.44      | 5.77  | 9.07  | 73.41 | 17.52 |                  |            |
| 300  | 300      | 1326    | 3/30/2015 | 34.70973 | -93.46104 | 0      | 70   | 0     | 7    | 0      | 217.91    | 6020.78 | 88.13      | 7.11  | 29.07 | 59.14 | 11.79 |                  |            |
| 300  | 300      | 1327    | 3/30/2015 | 34.70973 | -93.46104 | 1      | 45   | 1     | 62   | 0      | 217.78    | 6023.96 | 87.35      | 7.83  | 29.07 | 59.14 | 11.79 |                  |            |
| 300  | 300      | 1328    | 3/30/2015 | 34.70973 | -93.46104 | 0      | 30   | 1     | 42   | 0      | 217.62    | 6023.66 | 87.62      | 10.38 | 29.07 | 59.14 | 11.79 |                  |            |
| 300  | 300      | 1329    | 3/30/2015 | 34.70973 | -93.46104 | 9      | 70   | 1     | 56   | 0      | 217.62    | 6023.66 | 89.11      | 10.38 | 29.07 | 59.14 | 11.79 |                  |            |
| 300  | 300      | 1330    | 3/30/2015 | 34.70973 | -93.46104 | 25     | 80   | 1     | 27   | 0      | 217.49    | 6021.72 | 91.31      | 7.14  | 29.07 | 59.14 | 11.79 |                  |            |
| 300  | 300      | 1331    | 3/30/2015 | 34.70973 | -93.46104 | 21     | 68   | 1     | 7    | 0      | 217.04    | 6020.64 | 94.28      | 7.20  | 29.07 | 59.14 | 11.79 |                  |            |
| 301  | 301      | 1332    | 3/26/2015 | 34.40034 | -93.08140 | 0      | 100  | 1     | 36   | 0      | 138.34    | 5968.42 | 73.05      | 9.89  | 17.79 | 64.94 | 17.27 |                  |            |
| 301  | 301      | 1333    | 3/26/2015 | 34.40034 | -93.08140 | 0      | 100  | 1     | 52   | 0      | 138.34    | 5968.42 | 68.32      | 9.89  | 17.79 | 64.94 | 17.27 |                  |            |
| 301  | 301      | 1334    | 3/26/2015 | 34.40034 | -93.08140 | 24     | 85   | 1     | 55   | 0      | 138.68    | 5969.53 | 64.65      | 6.69  | 17.79 | 64.94 | 17.27 |                  |            |

**Table D.1 cont'd**

| Site | Transect | Quadrat | Date      | Latitude | Longitude | Canopy | Herb | Sedge | Stem | Burrow | Elevation | Solar   | Water_dist | CTI  | Sand  | Silt  | Clay  | Burrow ownership | Water_trns |
|------|----------|---------|-----------|----------|-----------|--------|------|-------|------|--------|-----------|---------|------------|------|-------|-------|-------|------------------|------------|
| 301  | 301      | 1335    | 3/26/2015 | 34.40034 | -93.08140 | 100    | 100  | 1     | 42   | 0      | 138.39    | 5970.81 | 61.37      | 7.20 | 17.79 | 64.94 | 17.27 |                  |            |
| 301  | 301      | 1336    | 3/26/2015 | 34.40034 | -93.08140 | 75     | 100  | 1     | 38   | 0      | 138.54    | 5969.52 | 58.13      | 7.94 | 17.79 | 64.94 | 17.27 |                  |            |
| 301  | 301      | 1337    | 3/26/2015 | 34.40034 | -93.08140 | 76     | 100  | 0     | 47   | 0      | 138.35    | 5968.43 | 55.92      | 9.81 | 17.79 | 64.94 | 17.27 |                  |            |
| 302  | 302      | 1338    | 3/30/2015 | 34.80457 | -93.46675 | 85     | 5    | 1     | 0    | 0      | 287.10    | 6064.50 | 523.81     | 8.07 | 18.77 | 71.83 | 9.40  |                  |            |
| 302  | 302      | 1339    | 3/30/2015 | 34.80457 | -93.46675 | 100    | 3    | 1     | 0    | 0      | 286.96    | 6063.33 | 532.24     | 7.50 | 18.77 | 71.83 | 9.40  |                  |            |
| 302  | 302      | 1340    | 3/30/2015 | 34.80457 | -93.46675 | 86     | 3    | 0     | 0    | 0      | 286.83    | 6055.17 | 540.73     | 6.88 | 18.77 | 71.83 | 9.40  |                  |            |
| 302  | 302      | 1341    | 3/30/2015 | 34.80457 | -93.46675 | 55     | 15   | 1     | 12   | 0      | 286.28    | 6035.59 | 549.29     | 6.18 | 18.77 | 71.83 | 9.40  |                  |            |
| 302  | 302      | 1342    | 3/30/2015 | 34.80457 | -93.46675 | 30     | 5    | 0     | 0    | 0      | 285.99    | 6037.02 | 557.97     | 6.09 | 18.77 | 71.83 | 9.40  |                  |            |
| 302  | 302      | 1343    | 3/30/2015 | 34.80457 | -93.46675 | 0      | 65   | 1     | 11   | 0      | 284.62    | 6031.33 | 566.60     | 6.72 | 18.77 | 71.83 | 9.40  |                  |            |
| 307  | 307      | 1344    | 3/27/2015 | 34.14621 | -93.59637 | 12     | 65   | 1     | 9    | 3      | 189.57    | 6011.37 | 809.12     | 9.00 | 36.12 | 56.42 | 7.47  |                  |            |
| 307  | 307      | 1345    | 3/27/2015 | 34.14621 | -93.59637 | 8      | 60   | 1     | 7    | 2      | 189.34    | 6011.48 | 810.98     | 9.11 | 36.12 | 56.42 | 7.47  |                  |            |
| 307  | 307      | 1346    | 3/27/2015 | 34.14621 | -93.59637 | 32     | 85   | 1     | 5    | 2      | 189.10    | 6011.47 | 812.88     | 9.13 | 36.12 | 56.42 | 7.47  |                  |            |
| 307  | 307      | 1347    | 3/27/2015 | 34.14621 | -93.59637 | 50     | 75   | 1     | 4    | 0      | 188.97    | 6011.77 | 814.92     | 9.21 | 36.12 | 56.42 | 7.47  |                  |            |
| 307  | 307      | 1348    | 3/27/2015 | 34.14621 | -93.59637 | 24     | 90   | 1     | 17   | 0      | 188.53    | 6009.38 | 817.05     | 8.70 | 36.12 | 56.42 | 7.47  |                  |            |
| 307  | 307      | 1349    | 3/27/2015 | 34.14621 | -93.59637 | 52     | 95   | 1     | 27   | 0      | 188.53    | 6009.38 | 819.39     | 8.70 | 36.12 | 56.42 | 7.47  |                  |            |
| 308  | 308      | 1350    | 3/29/2015 | 34.21942 | -93.50683 | 50     | 70   | 1     | 0    | 3      | 123.97    | 5965.63 | 78.59      | 8.86 | 34.51 | 58.90 | 6.59  |                  |            |
| 308  | 308      | 1351    | 3/29/2015 | 34.21942 | -93.50683 | 21     | 35   | 1     | 0    | 3      | 124.18    | 5965.79 | 87.96      | 7.86 | 34.51 | 58.90 | 6.59  |                  |            |
| 308  | 308      | 1352    | 3/29/2015 | 34.21942 | -93.50683 | 9      | 35   | 1     | 2    | 2      | 124.66    | 5965.62 | 97.25      | 7.42 | 34.51 | 58.90 | 6.59  |                  |            |
| 308  | 308      | 1353    | 3/29/2015 | 34.21942 | -93.50683 | 32     | 15   | 1     | 3    | 2      | 124.89    | 5960.19 | 106.62     | 8.80 | 34.51 | 58.90 | 6.59  |                  |            |
| 308  | 308      | 1354    | 3/29/2015 | 34.21942 | -93.50683 | 68     | 5    | 0     | 4    | 0      | 125.87    | 5962.59 | 115.94     | 7.93 | 34.51 | 58.90 | 6.59  |                  |            |
| 308  | 308      | 1355    | 3/29/2015 | 34.21942 | -93.50683 | 2      | 60   | 1     | 3    | 0      | 126.10    | 5967.80 | 125.31     | 8.35 | 34.51 | 58.90 | 6.59  |                  |            |
| 309  | 309      | 1356    | 3/24/2015 | 34.49177 | -92.97778 | 0      | 100  | 0     | 34   | 0      | 115.58    | 5941.04 | 64.30      | 8.05 | 16.45 | 63.52 | 20.03 |                  |            |
| 309  | 309      | 1357    | 3/24/2015 | 34.49177 | -92.97778 | 0      | 100  | 0     | 37   | 0      | 115.34    | 5943.56 | 66.81      | 6.00 | 16.45 | 63.52 | 20.03 |                  |            |
| 309  | 309      | 1358    | 3/24/2015 | 34.49177 | -92.97778 | 0      | 100  | 0     | 48   | 0      | 114.90    | 5944.79 | 69.93      | 7.69 | 16.45 | 63.52 | 20.03 |                  |            |
| 309  | 309      | 1359    | 3/24/2015 | 34.49177 | -92.97778 | 0      | 100  | 0     | 42   | 0      | 115.10    | 5948.00 | 73.14      | 5.71 | 16.45 | 63.52 | 20.03 |                  |            |
| 309  | 309      | 1360    | 3/24/2015 | 34.49177 | -92.97778 | 0      | 100  | 0     | 35   | 0      | 115.10    | 5948.00 | 76.35      | 5.71 | 16.45 | 63.52 | 20.03 |                  |            |
| 309  | 309      | 1361    | 3/24/2015 | 34.49177 | -92.97778 | 0      | 100  | 0     | 72   | 0      | 114.24    | 5952.60 | 78.56      | 7.15 | 16.45 | 63.52 | 20.03 |                  |            |

**Table D.1 cont'd**

| Site | Transect | Quadrat | Date      | Latitude | Longitude | Canopy | Herb | Sedge | Stem | Burrow | Elevation | Solar   | Water dist | CTI  | Sand  | Silt  | Clay  | Burrow ownership | Water trns |
|------|----------|---------|-----------|----------|-----------|--------|------|-------|------|--------|-----------|---------|------------|------|-------|-------|-------|------------------|------------|
| 310  | 310      | 1362    | 3/23/2015 | 34.57099 | -92.49532 | 97     | 8    | 1     | 0    | 0      | 109.38    | 5957.51 | 445.62     | 7.74 | 53.07 | 40.18 | 6.75  |                  |            |
| 310  | 310      | 1363    | 3/23/2015 | 34.57099 | -92.49532 | 98     | 7    | 0     | 0    | 0      | 109.40    | 5957.06 | 435.81     | 8.85 | 53.07 | 40.18 | 6.75  |                  |            |
| 310  | 310      | 1364    | 3/23/2015 | 34.57099 | -92.49532 | 100    | 5    | 0     | 1    | 0      | 109.47    | 5957.55 | 425.98     | 7.56 | 53.07 | 40.18 | 6.75  |                  |            |
| 310  | 310      | 1365    | 3/23/2015 | 34.57099 | -92.49532 | 99     | 12   | 0     | 1    | 0      | 109.44    | 5955.82 | 416.17     | 7.52 | 53.07 | 40.18 | 6.75  |                  |            |
| 310  | 310      | 1366    | 3/23/2015 | 34.57099 | -92.49532 | 96     | 5    | 1     | 2    | 0      | 109.36    | 5953.11 | 406.34     | 7.95 | 53.07 | 40.18 | 6.75  |                  |            |
| 310  | 310      | 1367    | 3/23/2015 | 34.57099 | -92.49532 | 78     | 7    | 0     | 0    | 0      | 109.18    | 5947.27 | 396.53     | 6.92 | 53.07 | 40.18 | 6.75  |                  |            |
| 311  | 311      | 1368    | 3/25/2015 | 34.70194 | -93.24039 | 24     | 95   | 1     | 23   | 0      | 223.25    | 6018.72 | 259.11     | 8.44 | 9.07  | 73.41 | 17.52 |                  |            |
| 311  | 311      | 1369    | 3/25/2015 | 34.70194 | -93.24039 | 40     | 90   | 1     | 16   | 0      | 222.71    | 6019.38 | 265.97     | 8.61 | 9.07  | 73.41 | 17.52 |                  |            |
| 311  | 311      | 1370    | 3/25/2015 | 34.70194 | -93.24039 | 40     | 100  | 1     | 47   | 0      | 222.90    | 6016.94 | 261.23     | 8.85 | 9.07  | 73.41 | 17.52 |                  |            |
| 311  | 311      | 1371    | 3/25/2015 | 34.70194 | -93.24039 | 28     | 95   | 0     | 37   | 0      | 222.61    | 6011.93 | 256.75     | 7.61 | 9.07  | 73.41 | 17.52 |                  |            |
| 311  | 311      | 1372    | 3/25/2015 | 34.70194 | -93.24039 | 25     | 100  | 0     | 25   | 0      | 222.11    | 5972.26 | 252.63     | 6.79 | 9.07  | 73.41 | 17.52 |                  |            |
| 311  | 311      | 1373    | 3/25/2015 | 34.70194 | -93.24039 | 30     | 100  | 0     | 54   | 0      | 222.11    | 5972.26 | 248.85     | 6.79 | 9.07  | 73.41 | 17.52 |                  |            |
| 313  | 313      | 1374    | 3/25/2015 | 34.65171 | -92.92240 | 52     | 90   | 0     | 15   | 0      | 188.16    | 5994.13 | 259.63     | 6.12 | 29.68 | 59.40 | 10.92 |                  |            |
| 313  | 313      | 1375    | 3/25/2015 | 34.65171 | -92.92240 | 20     | 85   | 1     | 27   | 0      | 185.55    | 5985.64 | 251.30     | 6.95 | 29.68 | 59.40 | 10.92 |                  |            |
| 313  | 313      | 1376    | 3/25/2015 | 34.65171 | -92.92240 | 24     | 70   | 0     | 12   | 0      | 185.08    | 5995.74 | 242.95     | 6.20 | 29.68 | 59.40 | 10.92 |                  |            |
| 313  | 313      | 1377    | 3/25/2015 | 34.65171 | -92.92240 | 0      | 70   | 0     | 56   | 0      | 184.95    | 6000.90 | 234.87     | 5.63 | 29.68 | 59.40 | 10.92 |                  |            |
| 313  | 313      | 1378    | 3/25/2015 | 34.65171 | -92.92240 | 0      | 80   | 0     | 48   | 0      | 183.84    | 6000.90 | 226.86     | 6.41 | 29.68 | 59.40 | 10.92 |                  |            |
| 313  | 313      | 1379    | 3/25/2015 | 34.65171 | -92.92240 | 1      | 90   | 0     | 64   | 0      | 183.85    | 6000.90 | 219.05     | 6.91 | 29.68 | 59.40 | 10.92 |                  |            |
| 314  | 314      | 1380    | 3/26/2015 | 34.44160 | -93.20860 | 24     | 10   | 0     | 4    | 0      | 170.71    | 5990.99 | 257.48     | 7.55 | 37.98 | 48.68 | 13.35 |                  |            |
| 314  | 314      | 1381    | 3/26/2015 | 34.44160 | -93.20860 | 48     | 98   | 1     | 169  | 0      | 170.72    | 5983.36 | 256.28     | 6.73 | 37.98 | 48.68 | 13.35 |                  |            |
| 314  | 314      | 1382    | 3/26/2015 | 34.44160 | -93.20860 | 24     | 90   | 1     | 47   | 0      | 170.21    | 5968.15 | 255.36     | 7.25 | 37.98 | 48.68 | 13.35 |                  |            |
| 314  | 314      | 1383    | 3/26/2015 | 34.44160 | -93.20860 | 98     | 1    | 0     | 0    | 0      | 169.58    | 5964.83 | 254.93     | 6.72 | 37.98 | 48.68 | 13.35 |                  |            |
| 314  | 314      | 1384    | 3/26/2015 | 34.44160 | -93.20860 | 100    | 1    | 0     | 0    | 0      | 168.94    | 5973.70 | 254.78     | 7.24 | 37.98 | 48.68 | 13.35 |                  |            |
| 314  | 314      | 1385    | 3/26/2015 | 34.44160 | -93.20860 | 100    | 1    | 0     | 0    | 0      | 168.40    | 5983.38 | 255.14     | 7.74 | 37.98 | 48.68 | 13.35 |                  |            |
| 318  | 318      | 1386    | 3/30/2015 | 34.82550 | -93.42265 | 48     | 20   | 0     | 0    | 1      | 241.92    | 6007.05 | 88.01      | 7.95 | 16.24 | 72.24 | 11.52 |                  |            |
| 318  | 318      | 1387    | 3/30/2015 | 34.82550 | -93.42265 | 60     | 70   | 1     | 17   | 0      | 242.01    | 6005.04 | 86.39      | 7.86 | 16.24 | 72.24 | 11.52 |                  |            |
| 318  | 318      | 1388    | 3/30/2015 | 34.82550 | -93.42265 | 93     | 65   | 0     | 14   | 0      | 242.11    | 6003.11 | 85.39      | 7.80 | 16.24 | 72.24 | 11.52 |                  |            |

**Table D.1 cont'd**

| Site | Transect | Quadrat | Date      | Latitude | Longitude | Canopy | Herb | Sedge | Stem | Burrow | Elevation | Solar   | Water.dist | CTI  | Sand  | Silt  | Clay  | Burrow ownership | Water_trns |
|------|----------|---------|-----------|----------|-----------|--------|------|-------|------|--------|-----------|---------|------------|------|-------|-------|-------|------------------|------------|
| 318  | 318      | 1389    | 3/30/2015 | 34.82550 | -93.42265 | 90     | 80   | 1     | 29   | 0      | 242.13    | 6002.03 | 84.93      | 7.77 | 16.24 | 72.24 | 11.52 |                  |            |
| 318  | 318      | 1390    | 3/30/2015 | 34.82550 | -93.42265 | 96     | 55   | 1     | 2    | 0      | 242.16    | 6001.64 | 84.36      | 7.76 | 16.24 | 72.24 | 11.52 |                  |            |
| 318  | 318      | 1391    | 3/30/2015 | 34.82550 | -93.42265 | 88     | 55   | 1     | 0    | 0      | 241.73    | 5998.10 | 84.06      | 7.91 | 16.24 | 72.24 | 11.52 |                  |            |
